# Supplementary material for: Improving the Gene Ontology Resource to Facilitate More Informative Analysis and Interpretation of Alzheimer’s Disease Data
Source: Genes (Basel). 2018 Nov 29;9(12):593. doi: 10.3390/genes9120593 (PMC6315915; doi:10.3390/genes9120593)
Supplement: Supplementary file 1 [file genes-09-00593-s001.xlsx]

## Sheet: Table S1
Table S1. Interacting partners of amyloid-beta (A) and microtubule-associated protein tau (B) prioritised for GO annotation. Database identifiers corresponding to human genes are listed: Database Identifier, either UniProt IDs (some with the chain clarified with PRO IDs e.g. P05067:PRO_0000000093) (https://www.uniprot.org/), or Complex Portal IDs (e.g. CPX-1070) (https://www.ebi.ac.uk/complexport…
(A)		Amyloid-beta				Project
		Database Identifier	UniProt / Complex Portal Name	HGNC Symbol	HGNC Name
	1	P42261	AMPA receptor subunit	GRIA1	glutamate ionotropic receptor AMPA type subunit 1	Amyloid-beta
	2	P42262	AMPA receptor subunit	GRIA2	glutamate ionotropic receptor AMPA type subunit 2
	3	P42263	AMPA receptor subunit	GRIA3	glutamate ionotropic receptor AMPA type subunit 3
	4	P48058	AMPA receptor subunit	GRIA4	glutamate ionotropic receptor AMPA type subunit 4
	5	P30988	Amylin 3 receptor (AMY3) (component)	CALCR	calcitonin receptor
	6	O60896	Amylin 3 receptor (AMY3) (component)	RAMP3	receptor activity modifying protein 3
	7	CPX-3187	Amylin receptor 3 complex	n/a	n/a
	8	P05067	Amyloid-beta A4 protein	APP	amyloid beta precursor protein
	9	P05067:PRO_0000000093	Amyloid-beta protein 40	APP	n/a
	10	CPX-1069	Amyloid-beta protein 40 complex	n/a	n/a
	11	CPX-1180	Amyloid-beta protein 40 oligomeric complex	n/a	n/a
	12	CPX-1062	Amyloid-beta protein 40/42 complex	n/a	n/a
	13	CPX-1120	Amyloid-beta protein 40/42 oligomeric complex	n/a	n/a
	14	P05067:PRO_0000000092	Amyloid-beta protein 42	APP	n/a
	15	CPX-1070	Amyloid-beta protein 42 complex	n/a	n/a
	16	CPX-1134	Amyloid-beta protein 42 oligomeric complex	n/a	n/a
	17	P02649	Apolipoprotein E (apoE)	APOE	apolipoprotein E
	18	P10909	Clusterin (ApoJ)	CLU	clusterin
	19	P11215	Complement receptor type 3 (CR3 or Mac1)	ITGAM	integrin subunit alpha M
	20	P05107	Complement receptor type 3 (CR3 or Mac1)	ITGB2	integrin subunit beta 2
	21	CPX-1826	Complement receptor type 3 (CR3 or Mac1)	n/a	n/a
	22	P54764	Ephrin A4 (EphA4)	EPHA4	EPH receptor A4
	23	P29323	Ephrin B2 (EphB2)	EPHB2	EPH receptor B2
	24	P31994	Fcγ receptor IIb (FcγRllb)	FCGR2B	Fc fragment of IgG receptor IIb
	25	P25090	Formyl peptide receptor-like 1 (FPRL1)	FPR2	formyl peptide receptor 2
	26	Q9ULV1	Frizzled-4	FZD4	frizzled class receptor 4
	27	Q13467	Frizzled-5	FZD5	frizzled class receptor 5
	28	Q05586	Glutamate receptor ionotropic, NMDA 1	GRIN1	glutamate ionotropic receptor NMDA type subunit 1
	29	Q12879	Glutamate receptor ionotropic, NMDA 2A	GRIN2A	glutamate ionotropic receptor NMDA type subunit 2A
	30	Q13224	Glutamate receptor ionotropic, NMDA 2B	GRIN2B	glutamate ionotropic receptor NMDA type subunit 2B
	31	P98160	Heparan sulfate proteoglycan (HSPG)	HSPG2	heparan sulfate proteoglycan 2
	32	P06213	Insulin receptor	INSR	insulin receptor
	33	Q8N423	Leukocyte immunoglobulin-like receptor B2 (LilrB2)	LILRB2	leukocyte immunoglobulin like receptor B2
	34	P01130	Low-density lipoprotein receptor (LDLR)	LDLR	low density lipoprotein receptor
	35	Q07954	Low-density lipoprotein receptor-related protein 1 (LRP1)	LRP1	LDL receptor related protein 1
	36	Q9UEW3	Macrophage receptor with collagenous structure (MARCO)	MARCO	macrophage receptor with collagenous structure
	37	P13637	Na+/K+-ATPase neuron-specific α3 subunit (NaKα3)	ATP1A3	ATPase Na+/K+ transporting subunit alpha 3
	38	Q8N2Q7	Neuroligin-1	NLGN1	neuroligin 1
	39	P08138	p75 neurotrophin receptor (p75NTR)	NGFR	nerve growth factor receptor
	40	Q13492	Phosphatidylinositol-binding clathrin assembly (PICALM) protein	PICALM	phosphatidylinositol binding clathrin assembly protein
	41	P04156	Prion protein (PrPC)	PRNP	prion protein
	42	Q15109	Receptor for advanced glycation end products (RAGE)	AGER	advanced glycosylation end-product specific receptor
	43	Q14108	Lysosome membrane protein 2	SCARB2	scavenger receptor class B member 2
	44	P16671	Platelet glycoprotein 4	CD36	CD36 molecule
	45	P21757	Scavenger receptors (SCARA1/2)	MSR1	macrophage scavenger receptor 1
	46	O00264	Sigma-2/PGRMC1	PGRMC1	progesterone receptor membrane component 1
	47	O60603	Toll-like receptor 2 (TLR2)	TLR2	toll like receptor 2
	48	O00555	Voltage-dependent P/Q-type calcium channel subunit alpha-1A	CACNA1A	calcium voltage-gated channel subunit alpha1 A
	49	P36544	α7-Nicotinic acetylcholine receptor (α 7nAChR)	CHRNA7	cholinergic receptor nicotinic alpha 7 subunit
	50	P07550	β2 adrenergic receptor (β2AR)	ADRB2	adrenoceptor beta 2
(B)		Micrtubule-associated protein tau				Project
		Database Identifier	UniProt / Complex Portal Name	HGNC Symbol	HGNC Name
	51	Q13131	5'-AMP-activated protein kinase catalytic subunit alpha-1	PRKAA1	protein kinase AMP-activated catalytic subunit alpha 1	Micrtubule-associated protein tau
	52	P60709	Actin, cytoplasmic 1	ACTB	actin beta
	53	O95816	BAG family molecular chaperone regulator 2	BAG2	BCL2 associated athanogene 2
	54	Q00535	Cyclin-dependent-like kinase 5	CDK5	cyclin dependent kinase 5
	55	Q13627	Dual specificity tyrosine-phosphorylation-regulated kinase 1A	DYRK1A	dual specificity tyrosine phosphorylation regulated kinase 1A
	56	Q14203	Dynactin subunit 1	DCTN1	dynactin subunit 1
	57	Q9UNE7	E3 ubiquitin-protein ligase CHIP	STUB1	STIP1 homology and U-box containing protein 1
	58	P49840	Glycogen synthase kinase-3 alpha	GSK3A	glycogen synthase kinase 3 alpha
	59	P49841	Glycogen synthase kinase-3 beta	GSK3B	glycogen synthase kinase 3 beta
	60	P08238	Heat shock protein HSP 90-beta	HSP90AB1	heat shock protein 90 alpha family class B member 1
	61	Q09472	Histone acetyltransferase p300	EP300	E1A binding protein p300
	62	Q9UBN7	Histone deacetylase 6	HDAC6	histone deacetylase 6
	63	Q99538	Legumain	LGMN	legumain
	64	P27448	MAP/microtubule affinity-regulating kinase 3	MARK3	microtubule affinity regulating kinase 3
	65	Q96L34	MAP/microtubule affinity-regulating kinase 4	MARK4	microtubule affinity regulating kinase 4
	66	P78559	Microtubule-associated protein 1A	MAP1A	microtubule associated protein 1A
	67	P11137	Microtubule-associated protein 2	MAP2	microtubule associated protein 2
	68	P10636	Microtubule-associated protein tau	MAPT	microtubule associated protein tau
	69	O00499	Myc box-dependent-interacting protein 1	BIN1	bridging integrator 1
	70	Q13526	Peptidyl-prolyl cis-trans isomerase NIMA-interacting 1	PIN1	peptidylprolyl cis/trans isomerase, NIMA-interacting 1
	71	Q13464	Rho-associated protein kinase 1	ROCK1	Rho associated coiled-coil containing protein kinase 1
	72	O75116	Rho-associated protein kinase 2	ROCK2	Rho associated coiled-coil containing protein kinase 2
	73	Q8TDC3	Serine/threonine-protein kinase BRSK1	BRSK1	BR serine/threonine kinase 1
	74	Q8IWQ3	Serine/threonine-protein kinase BRSK2	BRSK2	BR serine/threonine kinase 2
	75	Q9P0L2	Serine/threonine-protein kinase MARK1	MARK1	microtubule affinity regulating kinase 1
	76	Q7KZI7	Serine/threonine-protein kinase MARK2	MARK2	microtubule affinity regulating kinase 2
	77	Q7L7X3	Serine/threonine-protein kinase TAO1	TAOK1	TAO kinase 1
	78	Q9UL54	Serine/threonine-protein kinase TAO2	TAOK2	TAO kinase 2
	79	P67775	Serine/threonine-protein phosphatase 2A catalytic subunit alpha isoform	PPP2CA	protein phosphatase 2 catalytic subunit alpha
	80	P62714	Serine/threonine-protein phosphatase 2A catalytic subunit beta isoform	PPP2CB	protein phosphatase 2 catalytic subunit beta
	81	P53041	Serine/threonine-protein phosphatase 5	PPP5C	protein phosphatase 5 catalytic subunit
	82	Q5TCY1	Tau-tubulin kinase 1	TTBK1	tau tubulin kinase 1
	83	Q6IQ55	Tau-tubulin kinase 2	TTBK2	tau tubulin kinase 2
	84	P06241	Tyrosine-protein kinase Fyn	FYN	FYN proto-oncogene, Src family tyrosine kinase

## Sheet: Table S2
Table S2. Amyloid-beta monomers and/or oligomers. All of these amyloid-beta peptides or their complexes were annotated by the ARUK-UCL project. Six new complex IDs were created to facilitate the comprehensive annotation of amyloid-beta. The identifiers (IDs) listed are either UniProt IDs , with the chain clarified with PRO IDs (e.g. P05067:PRO_0000000093) (https://www.uniprot.org/), or Complex Po…
	UniProt/Complex Portal name	Type	Human identifier	Mouse identifier	Rat identifier
	Amyloid-beta protein 40	Monomer	P05067:PRO_0000000093	P12023:PRO_0000000119	P08592:PRO_0000000164
	Amyloid-beta protein 42	Monomer	P05067:PRO_0000000092	P12023:PRO_0000000118	P08592:PRO_0000000163
* New Complex Portal entires resulting from the ARUK-UCL project *	Amyloid-beta protein 42 complex	Dimer	CPX-1070	CPX-1107	CPX-1110
	Amyloid-beta protein 40 complex	Dimer	CPX-1069	CPX-1106	CPX-1109
	Amyloid-beta protein 40/42 complex	Dimer	CPX-1062	CPX-1105	CPX-1108
	Amyloid-beta protein 42 oligomeric complex	Oligomer	CPX-1134	CPX-1139	CPX-1183
	Amyloid-beta protein 40 oligomeric complex	Oligomer	CPX-1180	CPX-1181	CPX-1182
	Amyloid-beta protein 40/42 oligomeric complex	Oligomer	CPX-1120	CPX-1121	CPX-1184

## Sheet: Tables S3 (A - D)
Table S3 (A). All ARUK-UCL GO annotations contributed as a part of the amyloid-beta and tau projects (Data from QuickGO - accessed: 31 October 2018; filtered by ARUK-UCL and date). For full details about each column heading see the QuickGO browser (https://www.ebi.ac.uk/QuickGO/).															Table S3 (B). All ARUK-UCL GO annotations with PubMed (PMID) references, contributed as a part of the amyloid-beta and tau projects (Data from QuickGO - accessed: 31 October 2018; filtered by ARUK-UCL and date).															Table S3 (C). Summary of the annotations associated with each PubMed identifier per taxon, contributed by ARUK-UCL . For each prioritised gene product, PubMed searches were performed using the HUGO Gene Nomenclature Committee (HGNC) [18] approved Gene Symbols and names as well as their synonyms. The results were filtered by the following keywords (one at a time): ‘dementia’, ‘Alzheimer’s’, ‘Alzhe…
																																								Table S3 (D). A list of PubMed identifers, which had appeared in the PubMed searches, and thus were reviewed for suitability for annotations, but which could not be annotated, e.g. due to lack of species information.
																														Reference Identifier	Taxon IDs							Total number of annotations for each reference
GENE PRODUCT DB	GENE PRODUCT ID	SYMBOL	QUALIFIER	GO TERM	GO NAME	ECO ID	GO EVIDENCE CODE	REFERENCE	WITH/FROM	TAXON ID	ANNOTATION EXTENSION	DATE	GO ASPECT		GENE PRODUCT DB	GENE PRODUCT ID	SYMBOL	QUALIFIER	GO TERM	GO NAME	ECO ID	GO EVIDENCE CODE	REFERENCE	WITH/FROM	TAXON ID	ANNOTATION EXTENSION	DATE	GO ASPECT			9544	9606	9823	9913	9986	10090	10116			REFERENCE	Comment	Notes	Last updated
UniProtKB	Q866A2	CHRNA7	involved_in	GO:0007614	short-term memory	ECO:0000314	IDA	PMID:17898229		9544		20170109	P		UniProtKB	P49588	AARS	involved_in	GO:0071277	cellular response to calcium ion	ECO:0007007	HEP	PMID:21237226		9606	occurs_in(GO:0005634)	20180307	P		PMID:10066262		2						2		PMID:24533944	Not suitable for annotation	Disease/patient information	2018-05-15
UniProtKB	P49588	AARS	involved_in	GO:0071277	cellular response to calcium ion	ECO:0007007	HEP	PMID:21237226		9606	occurs_in(GO:0005634)	20180307	P		ComplexPortal	CPX-1069	abeta-40_human	involved_in	GO:1905809	negative regulation of synapse organization	ECO:0000304	TAS	PMID:26224839		9606		20170831	P		PMID:10362258		13				2	8	23		PMID:26738348	Not suitable for annotation	Disease/patient information	2018-02-05
ComplexPortal	CPX-1069	abeta-40_human	involved_in	GO:1905809	negative regulation of synapse organization	ECO:0000304	TAS	PMID:26224839		9606		20170831	P		ComplexPortal	CPX-1069	abeta-40_human	involved_in	GO:2000310	regulation of NMDA receptor activity	ECO:0000304	TAS	PMID:26224839		9606	causally_upstream_of(GO:1905809)	20170831	P		PMID:10542369		3				2	2	7		PMID:24485911	Not suitable for annotation	Disease/patient information	2017-12-19
ComplexPortal	CPX-1069	abeta-40_human	involved_in	GO:2000310	regulation of NMDA receptor activity	ECO:0000304	TAS	PMID:26224839		9606	causally_upstream_of(GO:1905809)	20170831	P		ComplexPortal	CPX-1062	abeta-40-42_human	involved_in	GO:0007611	learning or memory	ECO:0000314	IDA	PMID:18568035		9606		20170626	P		PMID:10640627		5					13	18		PMID:26031903	Not suitable for annotation	Disease/patient information	2017-07-13
ComplexPortal	CPX-1062	abeta-40-42_human	involved_in	GO:0007611	learning or memory	ECO:0000314	IDA	PMID:18568035		9606		20170626	P		ComplexPortal	CPX-1062	abeta-40-42_human	involved_in	GO:1900272	negative regulation of long-term synaptic potentiation	ECO:0000314	IDA	PMID:18568035		9606	occurs_in(UBERON:0002421)	20170626	P		PMID:10683146						3	10	13		PMID:26770414	Not suitable for annotation	Expression data	2018-03-06
ComplexPortal	CPX-1062	abeta-40-42_human	involved_in	GO:1900272	negative regulation of long-term synaptic potentiation	ECO:0000314	IDA	PMID:18568035		9606	occurs_in(UBERON:0002421)	20170626	P		ComplexPortal	CPX-1062	abeta-40-42_human	involved_in	GO:1900454	positive regulation of long term synaptic depression	ECO:0000314	IDA	PMID:18568035		9606	occurs_in(UBERON:0002421)	20170626	P		PMID:10964945							1	1		PMID:23803295	Not suitable for annotation	Expression data	2018-02-05
ComplexPortal	CPX-1062	abeta-40-42_human	involved_in	GO:1900454	positive regulation of long term synaptic depression	ECO:0000314	IDA	PMID:18568035		9606	occurs_in(UBERON:0002421)	20170626	P		ComplexPortal	CPX-1062	abeta-40-42_human	involved_in	GO:1902951	negative regulation of dendritic spine maintenance	ECO:0000314	IDA	PMID:18568035		9606	regulates_o_occurs_in(CL:1001571)	20170626	P		PMID:11140684		2						2		PMID:21321393	Not suitable for annotation	Expression data	2017-01-16
ComplexPortal	CPX-1062	abeta-40-42_human	involved_in	GO:1902951	negative regulation of dendritic spine maintenance	ECO:0000314	IDA	PMID:18568035		9606	regulates_o_occurs_in(CL:1001571)	20170626	P		ComplexPortal	CPX-1062	abeta-40-42_human	enables	GO:0046875	ephrin receptor binding	ECO:0000353	IPI	PMID:21113149	UniProtKB:A0A0G2JY48	9606	occurs_in(CL:0000540)	20171215	F		PMID:11140685		6						6		PMID:8725894	Not suitable for annotation	Insufficient data image quality	2017-10-12
ComplexPortal	CPX-1062	abeta-40-42_human	enables	GO:0046875	ephrin receptor binding	ECO:0000353	IPI	PMID:21113149	UniProtKB:A0A0G2JY48	9606	occurs_in(CL:0000540)	20171215	F		ComplexPortal	CPX-1062	abeta-40-42_human	involved_in	GO:1905809	negative regulation of synapse organization	ECO:0000304	TAS	PMID:26224839		9606		20170831	P		PMID:11160457		10						10		PMID:25576397	Not suitable for annotation	No species information	2018-05-16
ComplexPortal	CPX-1062	abeta-40-42_human	involved_in	GO:1905809	negative regulation of synapse organization	ECO:0000304	TAS	PMID:26224839		9606		20170831	P		ComplexPortal	CPX-1062	abeta-40-42_human	involved_in	GO:2000310	regulation of NMDA receptor activity	ECO:0000304	TAS	PMID:26224839		9606	causally_upstream_of(GO:1905809)	20170831	P		PMID:11240025		5				5		10		PMID:8780737	Not suitable for annotation	No species information	2018-05-15
ComplexPortal	CPX-1062	abeta-40-42_human	involved_in	GO:2000310	regulation of NMDA receptor activity	ECO:0000304	TAS	PMID:26224839		9606	causally_upstream_of(GO:1905809)	20170831	P		ComplexPortal	CPX-1120	abeta-40-42-oligomer_human	involved_in	GO:0051826	negative regulation of synapse structural plasticity	ECO:0000316	IGI	PMID:17360908	UniProtKB:P05067:VAR_000023	9606	regulates_o_occurs_in(CL:1001571)	20170626	P		PMID:11316806		7				4		11		PMID:23585562	Not suitable for annotation	No species information	2018-04-26
ComplexPortal	CPX-1120	abeta-40-42-oligomer_human	involved_in	GO:0051826	negative regulation of synapse structural plasticity	ECO:0000316	IGI	PMID:17360908	UniProtKB:P05067:VAR_000023	9606	regulates_o_occurs_in(CL:1001571)	20170626	P		ComplexPortal	CPX-1120	abeta-40-42-oligomer_human	involved_in	GO:0060025	regulation of synaptic activity	ECO:0000316	IGI	PMID:17360908	UniProtKB:P05067:VAR_000023	9606	regulates_o_occurs_in(CL:1001571),regulates_o_occurs_in(GO:0060076)	20170626	P		PMID:11404397		8				3	9	20		PMID:25600833	Not suitable for annotation	No species information	2018-03-06
ComplexPortal	CPX-1120	abeta-40-42-oligomer_human	involved_in	GO:0060025	regulation of synaptic activity	ECO:0000316	IGI	PMID:17360908	UniProtKB:P05067:VAR_000023	9606	regulates_o_occurs_in(CL:1001571),regulates_o_occurs_in(GO:0060076)	20170626	P		ComplexPortal	CPX-1120	abeta-40-42-oligomer_human	involved_in	GO:0090394	negative regulation of excitatory postsynaptic potential	ECO:0000316	IGI	PMID:17360908	UniProtKB:P05067:VAR_000023	9606	regulates_o_occurs_in(CL:1001571),part_of(GO:0060025)	20170626	P		PMID:11585923						5		5		PMID:25985852	Not suitable for annotation	No species information	2018-03-06
ComplexPortal	CPX-1120	abeta-40-42-oligomer_human	involved_in	GO:0090394	negative regulation of excitatory postsynaptic potential	ECO:0000316	IGI	PMID:17360908	UniProtKB:P05067:VAR_000023	9606	regulates_o_occurs_in(CL:1001571),part_of(GO:0060025)	20170626	P		ComplexPortal	CPX-1120	abeta-40-42-oligomer_human	involved_in	GO:1902951	negative regulation of dendritic spine maintenance	ECO:0000315	IMP	PMID:17360908	UniProtKB:P05067:VAR_000023	9606	regulates_o_occurs_in(CL:1001571),part_of(GO:0051826),has_agent(GO:0097720)	20170626	P		PMID:11689470		5						5		PMID:26208804	Not suitable for annotation	No species information	2018-03-06
ComplexPortal	CPX-1120	abeta-40-42-oligomer_human	involved_in	GO:1902951	negative regulation of dendritic spine maintenance	ECO:0000315	IMP	PMID:17360908	UniProtKB:P05067:VAR_000023	9606	regulates_o_occurs_in(CL:1001571),part_of(GO:0051826),has_agent(GO:0097720)	20170626	P		ComplexPortal	CPX-1120	abeta-40-42-oligomer_human	involved_in	GO:1902951	negative regulation of dendritic spine maintenance	ECO:0000316	IGI	PMID:17360908	UniProtKB:P05067:VAR_000023,UniProtKB:P35439	9606	regulates_o_occurs_in(CL:1001571)	20170626	P		PMID:11826099						10		10		PMID:26496817	Not suitable for annotation	No species information	2018-03-06
ComplexPortal	CPX-1120	abeta-40-42-oligomer_human	involved_in	GO:1902951	negative regulation of dendritic spine maintenance	ECO:0000316	IGI	PMID:17360908	UniProtKB:P05067:VAR_000023,UniProtKB:P35439	9606	regulates_o_occurs_in(CL:1001571)	20170626	P		ComplexPortal	CPX-1120	abeta-40-42-oligomer_human	involved_in	GO:1905949	negative regulation of calcium ion import across plasma membrane	ECO:0000316	IGI	PMID:17360908	UniProtKB:P05067:VAR_000023,UniProtKB:P35439	9606	occurs_in(CL:1001571)	20170626	P		PMID:11880515		5						5		PMID:25219467	Not suitable for annotation	No species information	2018-01-18
ComplexPortal	CPX-1120	abeta-40-42-oligomer_human	involved_in	GO:1905949	negative regulation of calcium ion import across plasma membrane	ECO:0000316	IGI	PMID:17360908	UniProtKB:P05067:VAR_000023,UniProtKB:P35439	9606	occurs_in(CL:1001571)	20170626	P		ComplexPortal	CPX-1120	abeta-40-42-oligomer_human	enables	GO:0046875	ephrin receptor binding	ECO:0000353	IPI	PMID:21113149	UniProtKB:A0A0G2JY48	9606	occurs_in(CL:0000540)	20171215	F		PMID:11927634		9						9		PMID:27876530	Not suitable for annotation	No species information	2017-09-11
ComplexPortal	CPX-1120	abeta-40-42-oligomer_human	enables	GO:0046875	ephrin receptor binding	ECO:0000353	IPI	PMID:21113149	UniProtKB:A0A0G2JY48	9606	occurs_in(CL:0000540)	20171215	F		ComplexPortal	CPX-1120	abeta-40-42-oligomer_human	involved_in	GO:0010628	positive regulation of gene expression	ECO:0000304	TAS	PMID:23164821		9606	regulates_expression_of(ENSEMBL:ENSG00000107984),regulates_o_occurs_in(CL:0000540),negatively_regulates(GO:0060070)	20170627	P		PMID:12383247						1	1	2		PMID:12068077	Not suitable for annotation	No species information	2017-09-06
ComplexPortal	CPX-1120	abeta-40-42-oligomer_human	involved_in	GO:0010628	positive regulation of gene expression	ECO:0000304	TAS	PMID:23164821		9606	regulates_expression_of(ENSEMBL:ENSG00000107984),regulates_o_occurs_in(CL:0000540),negatively_regulates(GO:0060070)	20170627	P		ComplexPortal	CPX-1120	abeta-40-42-oligomer_human	involved_in	GO:0010628	positive regulation of gene expression	ECO:0000316	IGI	PMID:23164821	UniProtKB:O94907	9606	regulates_o_occurs_in(CL:0002609),regulates_expression_of(ENSEMBL:ENSG00000166886)|regulates_o_occurs_in(CL:0002609),regulates_expression_of(ENSEMBL:ENSG00000155090)|regulates_o_occurs_in(CL:0002609),regulates_expression_of(ENSEMBL:ENSG00000110092)|regulates_o_occurs_in(CL:0002609),regulates_expression_of(ENSEMBL:ENSG00000170345)|regulates_o_occurs_in(CL:0002609),regulates_expression_of(ENSEMBL:E…	20170627	P		PMID:12610652						1	4	5		PMID:11222640	Not suitable for annotation	No species information	2017-09-06
ComplexPortal	CPX-1120	abeta-40-42-oligomer_human	involved_in	GO:0010628	positive regulation of gene expression	ECO:0000316	IGI	PMID:23164821	UniProtKB:O94907	9606	regulates_o_occurs_in(CL:0002609),regulates_expression_of(ENSEMBL:ENSG00000166886)|regulates_o_occurs_in(CL:0002609),regulates_expression_of(ENSEMBL:ENSG00000155090)|regulates_o_occurs_in(CL:0002609),regulates_expression_of(ENSEMBL:ENSG00000110092)|regulates_o_occurs_in(CL:0002609),regulates_expression_of(ENSEMBL:ENSG00000170345)|regulates_o_occurs_in(CL:0002609),regulates_expression_of(ENSEMBL:E…	20170627	P		ComplexPortal	CPX-1120	abeta-40-42-oligomer_human	involved_in	GO:0090647	modulation of age-related behavioral decline	ECO:0000304	TAS	PMID:25390368		9606		20170628	P		PMID:12639963		8						8		PMID:23719805	Not suitable for annotation	No species information	2017-08-08
ComplexPortal	CPX-1120	abeta-40-42-oligomer_human	involved_in	GO:0090647	modulation of age-related behavioral decline	ECO:0000304	TAS	PMID:25390368		9606		20170628	P		ComplexPortal	CPX-1120	abeta-40-42-oligomer_human	involved_in	GO:1905809	negative regulation of synapse organization	ECO:0000304	TAS	PMID:26224839		9606		20170831	P		PMID:12761548		2						2		PMID:25375922	Not suitable for annotation	Opinion/views article	2018-03-08
ComplexPortal	CPX-1120	abeta-40-42-oligomer_human	involved_in	GO:1905809	negative regulation of synapse organization	ECO:0000304	TAS	PMID:26224839		9606		20170831	P		ComplexPortal	CPX-1120	abeta-40-42-oligomer_human	involved_in	GO:2000310	regulation of NMDA receptor activity	ECO:0000304	TAS	PMID:26224839		9606	causally_upstream_of(GO:1905809)	20170831	P		PMID:12761826						3		3		PMID:24035895	Not suitable for annotation	Pharmacological data	2018-03-06
ComplexPortal	CPX-1120	abeta-40-42-oligomer_human	involved_in	GO:2000310	regulation of NMDA receptor activity	ECO:0000304	TAS	PMID:26224839		9606	causally_upstream_of(GO:1905809)	20170831	P		ComplexPortal	CPX-1180	abeta-40-oligomer_human	enables	GO:0051087	chaperone binding	ECO:0000353	IPI	PMID:22179788	UniProtKB:P10909	9606		20180118	F		PMID:14517247							1	1		PMID:23168113	Not suitable for annotation	Pharmacological data	2017-01-05
ComplexPortal	CPX-1180	abeta-40-oligomer_human	enables	GO:0051087	chaperone binding	ECO:0000353	IPI	PMID:22179788	UniProtKB:P10909	9606		20180118	F		ComplexPortal	CPX-1180	abeta-40-oligomer_human	enables	GO:0051087	chaperone binding	ECO:0000353	IPI	PMID:23106396	UniProtKB:P02511	9606		20180118	F		PMID:14522992		5					4	9		PMID:21416623	Not suitable for annotation	Review article	2018-03-13
ComplexPortal	CPX-1180	abeta-40-oligomer_human	enables	GO:0051087	chaperone binding	ECO:0000353	IPI	PMID:23106396	UniProtKB:P02511	9606		20180118	F		ComplexPortal	CPX-1180	abeta-40-oligomer_human	enables	GO:0051087	chaperone binding	ECO:0000353	IPI	PMID:23106396	UniProtKB:P10909	9606		20180118	F		PMID:15190117		8						8		PMID:24028951	Not suitable for annotation	Review article	2018-03-13
ComplexPortal	CPX-1180	abeta-40-oligomer_human	enables	GO:0051087	chaperone binding	ECO:0000353	IPI	PMID:23106396	UniProtKB:P10909	9606		20180118	F		ComplexPortal	CPX-1180	abeta-40-oligomer_human	enables	GO:0005102	signaling receptor binding	ECO:0000314	IDA	PMID:25390368		9606	occurs_in(GO:0045202)	20170831	F		PMID:15447668		4					2	6
ComplexPortal	CPX-1180	abeta-40-oligomer_human	enables	GO:0005102	signaling receptor binding	ECO:0000314	IDA	PMID:25390368		9606	occurs_in(GO:0045202)	20170831	F		ComplexPortal	CPX-1180	abeta-40-oligomer_human	involved_in	GO:1905809	negative regulation of synapse organization	ECO:0000304	TAS	PMID:26224839		9606		20170831	P		PMID:15457210		37						37
ComplexPortal	CPX-1180	abeta-40-oligomer_human	involved_in	GO:1905809	negative regulation of synapse organization	ECO:0000304	TAS	PMID:26224839		9606		20170831	P		ComplexPortal	CPX-1180	abeta-40-oligomer_human	involved_in	GO:2000310	regulation of NMDA receptor activity	ECO:0000304	TAS	PMID:26224839		9606	causally_upstream_of(GO:1905809)	20170831	P		PMID:15537891		18					1	19
ComplexPortal	CPX-1180	abeta-40-oligomer_human	involved_in	GO:2000310	regulation of NMDA receptor activity	ECO:0000304	TAS	PMID:26224839		9606	causally_upstream_of(GO:1905809)	20170831	P		ComplexPortal	CPX-1070	abeta-42_human	NOT|colocalizes_with	GO:0032590	dendrite membrane	ECO:0000314	IDA	PMID:15537891		9606		20170711	C		PMID:15546861		4					2	6
ComplexPortal	CPX-1070	abeta-42_human	NOT|colocalizes_with	GO:0032590	dendrite membrane	ECO:0000314	IDA	PMID:15537891		9606		20170711	C		ComplexPortal	CPX-1070	abeta-42_human	NOT|part_of	GO:0031232	extrinsic component of external side of plasma membrane	ECO:0000314	IDA	PMID:15537891		9606		20170711	C		PMID:15652487							3	3
ComplexPortal	CPX-1070	abeta-42_human	NOT|part_of	GO:0031232	extrinsic component of external side of plasma membrane	ECO:0000314	IDA	PMID:15537891		9606		20170711	C		ComplexPortal	CPX-1070	abeta-42_human	involved_in	GO:0007611	learning or memory	ECO:0000314	IDA	PMID:18568035		9606		20170626	P		PMID:15987691							2	2
ComplexPortal	CPX-1070	abeta-42_human	involved_in	GO:0007611	learning or memory	ECO:0000314	IDA	PMID:18568035		9606		20170626	P		ComplexPortal	CPX-1070	abeta-42_human	involved_in	GO:1900272	negative regulation of long-term synaptic potentiation	ECO:0000314	IDA	PMID:18568035		9606	occurs_in(UBERON:0002421)	20170626	P		PMID:16207813		29						29
ComplexPortal	CPX-1070	abeta-42_human	involved_in	GO:1900272	negative regulation of long-term synaptic potentiation	ECO:0000314	IDA	PMID:18568035		9606	occurs_in(UBERON:0002421)	20170626	P		ComplexPortal	CPX-1070	abeta-42_human	involved_in	GO:1900454	positive regulation of long term synaptic depression	ECO:0000314	IDA	PMID:18568035		9606	occurs_in(UBERON:0002421)	20170626	P		PMID:16262633		12						12
ComplexPortal	CPX-1070	abeta-42_human	involved_in	GO:1900454	positive regulation of long term synaptic depression	ECO:0000314	IDA	PMID:18568035		9606	occurs_in(UBERON:0002421)	20170626	P		ComplexPortal	CPX-1070	abeta-42_human	involved_in	GO:1902951	negative regulation of dendritic spine maintenance	ECO:0000314	IDA	PMID:18568035		9606	regulates_o_occurs_in(CL:1001571)	20170626	P		PMID:16273551		1						1
ComplexPortal	CPX-1070	abeta-42_human	involved_in	GO:1902951	negative regulation of dendritic spine maintenance	ECO:0000314	IDA	PMID:18568035		9606	regulates_o_occurs_in(CL:1001571)	20170626	P		ComplexPortal	CPX-1070	abeta-42_human	enables	GO:0031698	beta-2 adrenergic receptor binding	ECO:0000353	IPI	PMID:20395454	UniProtKB:P07550	9606	occurs_in(GO:0009897)	20170525	F		PMID:16505168		3						3
ComplexPortal	CPX-1070	abeta-42_human	enables	GO:0031698	beta-2 adrenergic receptor binding	ECO:0000353	IPI	PMID:20395454	UniProtKB:P07550	9606	occurs_in(GO:0009897)	20170525	F		ComplexPortal	CPX-1070	abeta-42_human	involved_in	GO:0010739	positive regulation of protein kinase A signaling	ECO:0000316	IGI	PMID:20395454	UniProtKB:P07550,UniProtKB:P18762	9606		20170525	P		PMID:16537926						2		2
ComplexPortal	CPX-1070	abeta-42_human	involved_in	GO:0010739	positive regulation of protein kinase A signaling	ECO:0000316	IGI	PMID:20395454	UniProtKB:P07550,UniProtKB:P18762	9606		20170525	P		ComplexPortal	CPX-1070	abeta-42_human	involved_in	GO:0071879	positive regulation of adenylate cyclase-activating adrenergic receptor signaling pathway	ECO:0000316	IGI	PMID:20395454	ENSEMBL_GeneID:ENSG00000087460,UniProtKB:P07550	9606		20170525	P		PMID:16541076		13						13
ComplexPortal	CPX-1070	abeta-42_human	involved_in	GO:0071879	positive regulation of adenylate cyclase-activating adrenergic receptor signaling pathway	ECO:0000316	IGI	PMID:20395454	ENSEMBL_GeneID:ENSG00000087460,UniProtKB:P07550	9606		20170525	P		ComplexPortal	CPX-1070	abeta-42_human	involved_in	GO:0071902	positive regulation of protein serine/threonine kinase activity	ECO:0000316	IGI	PMID:20395454	UniProtKB:P07550	9606	part_of(GO:0010739),has_regulation_target(UniProtKB:P42261),positively_regulates(GO:0004971)	20170525	P		PMID:16697218		4					2	6
ComplexPortal	CPX-1070	abeta-42_human	involved_in	GO:0071902	positive regulation of protein serine/threonine kinase activity	ECO:0000316	IGI	PMID:20395454	UniProtKB:P07550	9606	part_of(GO:0010739),has_regulation_target(UniProtKB:P42261),positively_regulates(GO:0004971)	20170525	P		ComplexPortal	CPX-1070	abeta-42_human	involved_in	GO:1904426	positive regulation of GTP binding	ECO:0000316	IGI	PMID:20395454	ENSEMBL_GeneID:ENSG00000087460,UniProtKB:P07550	9606	has_regulation_target(ENSEMBL:ENSG00000087460)	20170525	P		PMID:16717194		5					4	9
ComplexPortal	CPX-1070	abeta-42_human	involved_in	GO:1904426	positive regulation of GTP binding	ECO:0000316	IGI	PMID:20395454	ENSEMBL_GeneID:ENSG00000087460,UniProtKB:P07550	9606	has_regulation_target(ENSEMBL:ENSG00000087460)	20170525	P		ComplexPortal	CPX-1070	abeta-42_human	involved_in	GO:2000969	positive regulation of AMPA receptor activity	ECO:0000316	IGI	PMID:20395454	UniProtKB:P07550	9606	part_of(GO:0010739),has_regulation_target(UniProtKB:P42261)	20170525	P		PMID:16805831		7				1	1	9
ComplexPortal	CPX-1070	abeta-42_human	involved_in	GO:2000969	positive regulation of AMPA receptor activity	ECO:0000316	IGI	PMID:20395454	UniProtKB:P07550	9606	part_of(GO:0010739),has_regulation_target(UniProtKB:P42261)	20170525	P		ComplexPortal	CPX-1070	abeta-42_human	part_of	GO:0031232	extrinsic component of external side of plasma membrane	ECO:0000353	IPI	PMID:20395454	UniProtKB:P07550	9606		20170525	C		PMID:16923168		6				6		12
ComplexPortal	CPX-1070	abeta-42_human	part_of	GO:0031232	extrinsic component of external side of plasma membrane	ECO:0000353	IPI	PMID:20395454	UniProtKB:P07550	9606		20170525	C		ComplexPortal	CPX-1070	abeta-42_human	involved_in	GO:0061885	positive regulation of mini excitatory postsynaptic potential	ECO:0000316	IGI	PMID:20395454	UniProtKB:P18762	9606	part_of(GO:2000969),regulates_o_occurs_in(CL:0000540)	20170612	P		PMID:17139249		23						23
ComplexPortal	CPX-1070	abeta-42_human	involved_in	GO:0061885	positive regulation of mini excitatory postsynaptic potential	ECO:0000316	IGI	PMID:20395454	UniProtKB:P18762	9606	part_of(GO:2000969),regulates_o_occurs_in(CL:0000540)	20170612	P		ComplexPortal	CPX-1070	abeta-42_human	enables	GO:0046875	ephrin receptor binding	ECO:0000353	IPI	PMID:21113149	UniProtKB:A0A0G2JY48	9606	occurs_in(CL:0000540)	20170620	F		PMID:17251419		10						10
ComplexPortal	CPX-1070	abeta-42_human	enables	GO:0046875	ephrin receptor binding	ECO:0000353	IPI	PMID:21113149	UniProtKB:A0A0G2JY48	9606	occurs_in(CL:0000540)	20170620	F		ComplexPortal	CPX-1070	abeta-42_human	enables	GO:0046875	ephrin receptor binding	ECO:0000353	IPI	PMID:21113149	UniProtKB:P54763	9606		20170620	F		PMID:17308309		9					5	14
ComplexPortal	CPX-1070	abeta-42_human	enables	GO:0046875	ephrin receptor binding	ECO:0000353	IPI	PMID:21113149	UniProtKB:P54763	9606		20170620	F		ComplexPortal	CPX-1070	abeta-42_human	involved_in	GO:0010629	negative regulation of gene expression	ECO:0000314	IDA	PMID:21113149		9606	regulates_expression_of(ENSEMBL:ENSG00000133216),regulates_o_occurs_in(CL:0000540)	20170620	P		PMID:17360908		7					2	9
ComplexPortal	CPX-1070	abeta-42_human	involved_in	GO:0010629	negative regulation of gene expression	ECO:0000314	IDA	PMID:21113149		9606	regulates_expression_of(ENSEMBL:ENSG00000133216),regulates_o_occurs_in(CL:0000540)	20170620	P		ComplexPortal	CPX-1070	abeta-42_human	involved_in	GO:0032436	positive regulation of proteasomal ubiquitin-dependent protein catabolic process	ECO:0000314	IDA	PMID:21113149		9606	has_regulation_target(UniProtKB:P29323),regulates_o_occurs_in(CL:0000540)	20170620	P		PMID:17491008		11		8			3	22
ComplexPortal	CPX-1070	abeta-42_human	involved_in	GO:0032436	positive regulation of proteasomal ubiquitin-dependent protein catabolic process	ECO:0000314	IDA	PMID:21113149		9606	has_regulation_target(UniProtKB:P29323),regulates_o_occurs_in(CL:0000540)	20170620	P		ComplexPortal	CPX-1070	abeta-42_human	involved_in	GO:0031914	negative regulation of synaptic plasticity	ECO:0000316	IGI	PMID:21113149	UniProtKB:P54763	9606	occurs_in(UBERON:0001885)	20170627	P		PMID:17502348						12		12
ComplexPortal	CPX-1070	abeta-42_human	involved_in	GO:0031914	negative regulation of synaptic plasticity	ECO:0000316	IGI	PMID:21113149	UniProtKB:P54763	9606	occurs_in(UBERON:0001885)	20170627	P		ComplexPortal	CPX-1070	abeta-42_human	involved_in	GO:1900272	negative regulation of long-term synaptic potentiation	ECO:0000314	IDA	PMID:21113149		9606	occurs_in(CL:2000089)	20170627	P		PMID:17517623		4				7	3	14
ComplexPortal	CPX-1070	abeta-42_human	involved_in	GO:1900272	negative regulation of long-term synaptic potentiation	ECO:0000314	IDA	PMID:21113149		9606	occurs_in(CL:2000089)	20170627	P		ComplexPortal	CPX-1070	abeta-42_human	involved_in	GO:1900272	negative regulation of long-term synaptic potentiation	ECO:0000314	IDA	PMID:21593310		9606	occurs_in(UBERON:0002421)	20170626	P		PMID:17526495		43					12	55
ComplexPortal	CPX-1070	abeta-42_human	involved_in	GO:1900272	negative regulation of long-term synaptic potentiation	ECO:0000314	IDA	PMID:21593310		9606	occurs_in(UBERON:0002421)	20170626	P		ComplexPortal	CPX-1070	abeta-42_human	involved_in	GO:1905809	negative regulation of synapse organization	ECO:0000304	TAS	PMID:26224839		9606		20170831	P		PMID:17573534		1				5		6
ComplexPortal	CPX-1070	abeta-42_human	involved_in	GO:1905809	negative regulation of synapse organization	ECO:0000304	TAS	PMID:26224839		9606		20170831	P		ComplexPortal	CPX-1070	abeta-42_human	involved_in	GO:2000310	regulation of NMDA receptor activity	ECO:0000304	TAS	PMID:26224839		9606	causally_upstream_of(GO:1905809)	20170831	P		PMID:17898229	1	2				3	5	11
ComplexPortal	CPX-1070	abeta-42_human	involved_in	GO:2000310	regulation of NMDA receptor activity	ECO:0000304	TAS	PMID:26224839		9606	causally_upstream_of(GO:1905809)	20170831	P		ComplexPortal	CPX-1134	abeta-42-oligomer_human	involved_in	GO:0007613	memory	ECO:0000316	IGI	PMID:11140685	UniProtKB:P05067:PRO_0000000092	9606	part_of(GO:0090647)	20170710	P		PMID:17900936		1						1
ComplexPortal	CPX-1134	abeta-42-oligomer_human	involved_in	GO:0010800	positive regulation of peptidyl-threonine phosphorylation	ECO:0000250	ISS	GO_REF:0000024	ComplexPortal:CPX-1183	9606	has_regulation_target(UniProtKB:Q15418),occurs_in(UBERON:0002421)	20170831	P		ComplexPortal	CPX-1134	abeta-42-oligomer_human	involved_in	GO:0090647	modulation of age-related behavioral decline	ECO:0000316	IGI	PMID:11140685	UniProtKB:P05067:PRO_0000000092	9606		20170710	P		PMID:17906291		4				4		8
ComplexPortal	CPX-1134	abeta-42-oligomer_human	involved_in	GO:0070374	positive regulation of ERK1 and ERK2 cascade	ECO:0000250	ISS	GO_REF:0000024	ComplexPortal:CPX-1183	9606	occurs_in(UBERON:0002421)	20170831	P		ComplexPortal	CPX-1134	abeta-42-oligomer_human	involved_in	GO:1905906	regulation of amyloid fibril formation	ECO:0000316	IGI	PMID:11140685	UniProtKB:P05067:PRO_0000000092	9606	occurs_in(UBERON:0002421)|occurs_in(UBERON:0000956)	20170710	P		PMID:18022370		2				2		4
ComplexPortal	CPX-1134	abeta-42-oligomer_human	involved_in	GO:0007613	memory	ECO:0000316	IGI	PMID:11140685	UniProtKB:P05067:PRO_0000000092	9606	part_of(GO:0090647)	20170710	P		ComplexPortal	CPX-1134	abeta-42-oligomer_human	involved_in	GO:0090026	positive regulation of monocyte chemotaxis	ECO:0000314	IDA	PMID:11160457		9606	part_of(GO:1904646)	20170605	P		PMID:18216187		2						2
ComplexPortal	CPX-1134	abeta-42-oligomer_human	involved_in	GO:0090647	modulation of age-related behavioral decline	ECO:0000316	IGI	PMID:11140685	UniProtKB:P05067:PRO_0000000092	9606		20170710	P		ComplexPortal	CPX-1134	abeta-42-oligomer_human	involved_in	GO:0000185	activation of MAPKKK activity	ECO:0000316	IGI	PMID:15190117	UniProtKB:P05067:PRO_0000000092	9606	occurs_in(UBERON:0002421),part_of(GO:0045666)	20170614	P		PMID:18216281		16					14	30
ComplexPortal	CPX-1134	abeta-42-oligomer_human	involved_in	GO:1905906	regulation of amyloid fibril formation	ECO:0000316	IGI	PMID:11140685	UniProtKB:P05067:PRO_0000000092	9606	occurs_in(UBERON:0002421)|occurs_in(UBERON:0000956)	20170710	P		ComplexPortal	CPX-1134	abeta-42-oligomer_human	involved_in	GO:0043410	positive regulation of MAPK cascade	ECO:0000316	IGI	PMID:15190117	UniProtKB:P05067:PRO_0000000092	9606	occurs_in(UBERON:0002421),part_of(GO:0045666)	20170614	P		PMID:18234671		19						19
ComplexPortal	CPX-1134	abeta-42-oligomer_human	involved_in	GO:0090026	positive regulation of monocyte chemotaxis	ECO:0000314	IDA	PMID:11160457		9606	part_of(GO:1904646)	20170605	P		ComplexPortal	CPX-1134	abeta-42-oligomer_human	involved_in	GO:0045666	positive regulation of neuron differentiation	ECO:0000316	IGI	PMID:15190117	UniProtKB:P05067:PRO_0000000092	9606	occurs_in(UBERON:0002421)	20170614	P		PMID:18268107		4				6	2	12
ComplexPortal	CPX-1134	abeta-42-oligomer_human	involved_in	GO:0000185	activation of MAPKKK activity	ECO:0000316	IGI	PMID:15190117	UniProtKB:P05067:PRO_0000000092	9606	occurs_in(UBERON:0002421),part_of(GO:0045666)	20170614	P		ComplexPortal	CPX-1134	abeta-42-oligomer_human	involved_in	GO:0061098	positive regulation of protein tyrosine kinase activity	ECO:0000316	IGI	PMID:15190117	UniProtKB:P05067:PRO_0000000092	9606	occurs_in(UBERON:0002421),part_of(GO:0045666)	20170614	P		PMID:18272392		2						2
ComplexPortal	CPX-1134	abeta-42-oligomer_human	involved_in	GO:0043410	positive regulation of MAPK cascade	ECO:0000316	IGI	PMID:15190117	UniProtKB:P05067:PRO_0000000092	9606	occurs_in(UBERON:0002421),part_of(GO:0045666)	20170614	P		ComplexPortal	CPX-1134	abeta-42-oligomer_human	colocalizes_with	GO:0032590	dendrite membrane	ECO:0000314	IDA	PMID:15537891		9606	part_of(CL:0002608),part_of(GO:0030425)	20170711	C		PMID:18292230		6				2		8
ComplexPortal	CPX-1134	abeta-42-oligomer_human	involved_in	GO:0045666	positive regulation of neuron differentiation	ECO:0000316	IGI	PMID:15190117	UniProtKB:P05067:PRO_0000000092	9606	occurs_in(UBERON:0002421)	20170614	P		ComplexPortal	CPX-1134	abeta-42-oligomer_human	colocalizes_with	GO:0032809	neuronal cell body membrane	ECO:0000314	IDA	PMID:15537891		9606	part_of(CL:0002608)	20170711	C		PMID:18305234		8						8
ComplexPortal	CPX-1134	abeta-42-oligomer_human	involved_in	GO:0061098	positive regulation of protein tyrosine kinase activity	ECO:0000316	IGI	PMID:15190117	UniProtKB:P05067:PRO_0000000092	9606	occurs_in(UBERON:0002421),part_of(GO:0045666)	20170614	P		ComplexPortal	CPX-1134	abeta-42-oligomer_human	colocalizes_with	GO:0043197	dendritic spine	ECO:0000303	NAS	PMID:15537891		9606		20170711	C		PMID:18331289		18					4	22
ComplexPortal	CPX-1134	abeta-42-oligomer_human	colocalizes_with	GO:0032590	dendrite membrane	ECO:0000314	IDA	PMID:15537891		9606	part_of(CL:0002608),part_of(GO:0030425)	20170711	C		ComplexPortal	CPX-1134	abeta-42-oligomer_human	involved_in	GO:0031914	negative regulation of synaptic plasticity	ECO:0000304	TAS	PMID:15537891		9606		20170711	P		PMID:18364389		6						6
ComplexPortal	CPX-1134	abeta-42-oligomer_human	colocalizes_with	GO:0032809	neuronal cell body membrane	ECO:0000314	IDA	PMID:15537891		9606	part_of(CL:0002608)	20170711	C		ComplexPortal	CPX-1134	abeta-42-oligomer_human	part_of	GO:0005615	extracellular space	ECO:0000314	IDA	PMID:15537891		9606	adjacent_to(CL:0000540),part_of(UBERON:0000956)|adjacent_to(CL:0000540),part_of(UBERON:0002037)|adjacent_to(CL:0000540),part_of(UBERON:0001359)	20170711	C		PMID:18367618		7				3		10
ComplexPortal	CPX-1134	abeta-42-oligomer_human	colocalizes_with	GO:0043197	dendritic spine	ECO:0000303	NAS	PMID:15537891		9606		20170711	C		ComplexPortal	CPX-1134	abeta-42-oligomer_human	part_of	GO:0031232	extrinsic component of external side of plasma membrane	ECO:0000314	IDA	PMID:15537891		9606	part_of(CL:0002608),part_of(GO:0032589)|part_of(CL:0002608),part_of(GO:0032809)|part_of(CL:0002608),part_of(GO:0032590)	20170711	C		PMID:18374643		10					1	11
ComplexPortal	CPX-1134	abeta-42-oligomer_human	involved_in	GO:0031914	negative regulation of synaptic plasticity	ECO:0000304	TAS	PMID:15537891		9606		20170711	P		ComplexPortal	CPX-1134	abeta-42-oligomer_human	part_of	GO:0099147	extrinsic component of postsynaptic density membrane	ECO:0000314	IDA	PMID:15537891		9606	part_of(GO:0099573),part_of(CL:0002608)	20170711	C		PMID:18377911		8				1		9
ComplexPortal	CPX-1134	abeta-42-oligomer_human	part_of	GO:0005615	extracellular space	ECO:0000314	IDA	PMID:15537891		9606	adjacent_to(CL:0000540),part_of(UBERON:0000956)|adjacent_to(CL:0000540),part_of(UBERON:0002037)|adjacent_to(CL:0000540),part_of(UBERON:0001359)	20170711	C		ComplexPortal	CPX-1134	abeta-42-oligomer_human	part_of	GO:0099573	glutamatergic postsynaptic density	ECO:0000314	IDA	PMID:15537891		9606	part_of(CL:0002608)	20170711	C		PMID:18492799						3		3
ComplexPortal	CPX-1134	abeta-42-oligomer_human	part_of	GO:0031232	extrinsic component of external side of plasma membrane	ECO:0000314	IDA	PMID:15537891		9606	part_of(CL:0002608),part_of(GO:0032589)|part_of(CL:0002608),part_of(GO:0032809)|part_of(CL:0002608),part_of(GO:0032590)	20170711	C		ComplexPortal	CPX-1134	abeta-42-oligomer_human	involved_in	GO:0061001	regulation of dendritic spine morphogenesis	ECO:0000316	IGI	PMID:15537891	UniProtKB:Q63053	9606	regulates_o_occurs_in(CL:0002608)	20170712	P		PMID:18568035		13						13
ComplexPortal	CPX-1134	abeta-42-oligomer_human	part_of	GO:0099147	extrinsic component of postsynaptic density membrane	ECO:0000314	IDA	PMID:15537891		9606	part_of(GO:0099573),part_of(CL:0002608)	20170711	C		ComplexPortal	CPX-1134	abeta-42-oligomer_human	involved_in	GO:1903827	regulation of cellular protein localization	ECO:0000314	IDA	PMID:15537891		9606	regulates_o_occurs_in(CL:0002608),has_regulation_target(UniProtKB:Q7LC44),has_target_end_location(GO:0043197)	20170712	P		PMID:18723082		7					9	16
ComplexPortal	CPX-1134	abeta-42-oligomer_human	part_of	GO:0099573	glutamatergic postsynaptic density	ECO:0000314	IDA	PMID:15537891		9606	part_of(CL:0002608)	20170711	C		ComplexPortal	CPX-1134	abeta-42-oligomer_human	involved_in	GO:0007613	memory	ECO:0000270	IEP	PMID:16541076		9606		20170626	P		PMID:18981141		7				15		22
ComplexPortal	CPX-1134	abeta-42-oligomer_human	involved_in	GO:0061001	regulation of dendritic spine morphogenesis	ECO:0000316	IGI	PMID:15537891	UniProtKB:Q63053	9606	regulates_o_occurs_in(CL:0002608)	20170712	P		ComplexPortal	CPX-1134	abeta-42-oligomer_human	involved_in	GO:0007613	memory	ECO:0000316	IGI	PMID:16541076	UniProtKB:P05067:PRO_0000000092	9606		20170626	P		PMID:18981818		1				2		3
ComplexPortal	CPX-1134	abeta-42-oligomer_human	involved_in	GO:1903827	regulation of cellular protein localization	ECO:0000314	IDA	PMID:15537891		9606	regulates_o_occurs_in(CL:0002608),has_regulation_target(UniProtKB:Q7LC44),has_target_end_location(GO:0043197)	20170712	P		ComplexPortal	CPX-1134	abeta-42-oligomer_human	part_of	GO:0005615	extracellular space	ECO:0000314	IDA	PMID:16541076		9606		20170626	C		PMID:19004011						6		6
ComplexPortal	CPX-1134	abeta-42-oligomer_human	involved_in	GO:0007613	memory	ECO:0000270	IEP	PMID:16541076		9606		20170626	P		ComplexPortal	CPX-1134	abeta-42-oligomer_human	involved_in	GO:0090647	modulation of age-related behavioral decline	ECO:0000304	TAS	PMID:16541076		9606		20170628	P		PMID:19118186		9				11		20
ComplexPortal	CPX-1134	abeta-42-oligomer_human	involved_in	GO:0007613	memory	ECO:0000316	IGI	PMID:16541076	UniProtKB:P05067:PRO_0000000092	9606		20170626	P		ComplexPortal	CPX-1134	abeta-42-oligomer_human	part_of	GO:0005622	intracellular	ECO:0000314	IDA	PMID:16541076		9606		20180118	C		PMID:19118188		19				11		30
ComplexPortal	CPX-1134	abeta-42-oligomer_human	part_of	GO:0005615	extracellular space	ECO:0000314	IDA	PMID:16541076		9606		20170626	C		ComplexPortal	CPX-1134	abeta-42-oligomer_human	colocalizes_with	GO:0044307	dendritic branch	ECO:0000314	IDA	PMID:17251419		9606	part_of(CL:0002608),part_of(GO:0098978)	20170626	C		PMID:19188609		18					10	28
ComplexPortal	CPX-1134	abeta-42-oligomer_human	involved_in	GO:0090647	modulation of age-related behavioral decline	ECO:0000304	TAS	PMID:16541076		9606		20170628	P		ComplexPortal	CPX-1134	abeta-42-oligomer_human	colocalizes_with	GO:0098978	glutamatergic synapse	ECO:0000314	IDA	PMID:17251419		9606	part_of(CL:0002608)	20170626	C		PMID:19221410		1				2		3
ComplexPortal	CPX-1134	abeta-42-oligomer_human	part_of	GO:0005622	intracellular	ECO:0000314	IDA	PMID:16541076		9606		20180118	C		ComplexPortal	CPX-1134	abeta-42-oligomer_human	involved_in	GO:1902950	regulation of dendritic spine maintenance	ECO:0000314	IDA	PMID:17251419		9606	regulates_o_occurs_in(CL:0002608)	20170626	P		PMID:19228967		10				10	8	28
ComplexPortal	CPX-1134	abeta-42-oligomer_human	colocalizes_with	GO:0044307	dendritic branch	ECO:0000314	IDA	PMID:17251419		9606	part_of(CL:0002608),part_of(GO:0098978)	20170626	C		ComplexPortal	CPX-1134	abeta-42-oligomer_human	involved_in	GO:1903077	negative regulation of protein localization to plasma membrane	ECO:0000314	IDA	PMID:17251419		9606	has_regulation_target(UniProtKB:Q05586)|has_regulation_target(UniProtKB:Q13224)|has_regulation_target(UniProtKB:P29323)|has_regulation_target(UniProtKB:Q16643)	20170626	P		PMID:19230830						3		3
ComplexPortal	CPX-1134	abeta-42-oligomer_human	colocalizes_with	GO:0098978	glutamatergic synapse	ECO:0000314	IDA	PMID:17251419		9606	part_of(CL:0002608)	20170626	C		ComplexPortal	CPX-1134	abeta-42-oligomer_human	part_of	GO:0043197	dendritic spine	ECO:0000304	TAS	PMID:17251419		9606		20170626	C		PMID:19242475		2				10		12
ComplexPortal	CPX-1134	abeta-42-oligomer_human	involved_in	GO:1902950	regulation of dendritic spine maintenance	ECO:0000314	IDA	PMID:17251419		9606	regulates_o_occurs_in(CL:0002608)	20170626	P		ComplexPortal	CPX-1134	abeta-42-oligomer_human	part_of	GO:0044327	dendritic spine head	ECO:0000314	IDA	PMID:17251419		9606	part_of(CL:0002608)	20170626	C		PMID:19363271		4					1	5
ComplexPortal	CPX-1134	abeta-42-oligomer_human	involved_in	GO:1903077	negative regulation of protein localization to plasma membrane	ECO:0000314	IDA	PMID:17251419		9606	has_regulation_target(UniProtKB:Q05586)|has_regulation_target(UniProtKB:Q13224)|has_regulation_target(UniProtKB:P29323)|has_regulation_target(UniProtKB:Q16643)	20170626	P		ComplexPortal	CPX-1134	abeta-42-oligomer_human	part_of	GO:0060076	excitatory synapse	ECO:0000314	IDA	PMID:17251419		9606		20170626	C		PMID:19406747		25					12	37
ComplexPortal	CPX-1134	abeta-42-oligomer_human	part_of	GO:0043197	dendritic spine	ECO:0000304	TAS	PMID:17251419		9606		20170626	C		ComplexPortal	CPX-1134	abeta-42-oligomer_human	part_of	GO:0098794	postsynapse	ECO:0000314	IDA	PMID:17251419		9606	part_of(UBERON:0001890)	20170626	C		PMID:19457097		7				4		11
ComplexPortal	CPX-1134	abeta-42-oligomer_human	part_of	GO:0044327	dendritic spine head	ECO:0000314	IDA	PMID:17251419		9606	part_of(CL:0002608)	20170626	C		ComplexPortal	CPX-1134	abeta-42-oligomer_human	colocalizes_with	GO:0044307	dendritic branch	ECO:0000314	IDA	PMID:17308309		9606	part_of(CL:0002608)	20170627	C		PMID:19587288		2				2		4
ComplexPortal	CPX-1134	abeta-42-oligomer_human	part_of	GO:0060076	excitatory synapse	ECO:0000314	IDA	PMID:17251419		9606		20170626	C		ComplexPortal	CPX-1134	abeta-42-oligomer_human	colocalizes_with	GO:0097060	synaptic membrane	ECO:0000353	IPI	PMID:17308309	UniProtKB:P35439	9606	part_of(UBERON:0001890)	20170627	C		PMID:19660551		10						10
ComplexPortal	CPX-1134	abeta-42-oligomer_human	part_of	GO:0098794	postsynapse	ECO:0000314	IDA	PMID:17251419		9606	part_of(UBERON:0001890)	20170626	C		ComplexPortal	CPX-1134	abeta-42-oligomer_human	enables	GO:0035255	ionotropic glutamate receptor binding	ECO:0000353	IPI	PMID:17308309	UniProtKB:P35439	9606	occurs_in(GO:0097060),occurs_in(UBERON:0001890),positively_regulates(GO:0060402),occurs_at(GO:0106003)|occurs_in(GO:0097060),occurs_in(UBERON:0001890),positively_regulates(GO:1903409),occurs_at(GO:0106003)	20170627	F		PMID:19953350		1				1	5	7
ComplexPortal	CPX-1134	abeta-42-oligomer_human	colocalizes_with	GO:0044307	dendritic branch	ECO:0000314	IDA	PMID:17308309		9606	part_of(CL:0002608)	20170627	C		ComplexPortal	CPX-1134	abeta-42-oligomer_human	involved_in	GO:0010524	positive regulation of calcium ion transport into cytosol	ECO:0000314	IDA	PMID:17308309		9606	regulates_o_occurs_in(CL:0002608),positively_regulates(GO:1903409)	20170627	P		PMID:20005821		16				7		23
ComplexPortal	CPX-1134	abeta-42-oligomer_human	colocalizes_with	GO:0097060	synaptic membrane	ECO:0000353	IPI	PMID:17308309	UniProtKB:P35439	9606	part_of(UBERON:0001890)	20170627	C		ComplexPortal	CPX-1134	abeta-42-oligomer_human	involved_in	GO:0010524	positive regulation of calcium ion transport into cytosol	ECO:0000316	IGI	PMID:17308309	UniProtKB:P35439	9606	regulates_o_occurs_in(CL:0002608),positively_regulates(GO:1903409)	20170627	P		PMID:20032460		18				1	9	28
ComplexPortal	CPX-1134	abeta-42-oligomer_human	enables	GO:0035255	ionotropic glutamate receptor binding	ECO:0000353	IPI	PMID:17308309	UniProtKB:P35439	9606	occurs_in(GO:0097060),occurs_in(UBERON:0001890),positively_regulates(GO:0060402),occurs_at(GO:0106003)|occurs_in(GO:0097060),occurs_in(UBERON:0001890),positively_regulates(GO:1903409),occurs_at(GO:0106003)	20170627	F		ComplexPortal	CPX-1134	abeta-42-oligomer_human	involved_in	GO:1903428	positive regulation of reactive oxygen species biosynthetic process	ECO:0000314	IDA	PMID:17308309		9606	regulates_o_occurs_in(CL:0002608),occurs_in(GO:0044307),regulates_o_occurs_in(GO:0005739)	20170627	P		PMID:20037584		35				38		73
ComplexPortal	CPX-1134	abeta-42-oligomer_human	involved_in	GO:0010524	positive regulation of calcium ion transport into cytosol	ECO:0000314	IDA	PMID:17308309		9606	regulates_o_occurs_in(CL:0002608),positively_regulates(GO:1903409)	20170627	P		ComplexPortal	CPX-1134	abeta-42-oligomer_human	involved_in	GO:1903428	positive regulation of reactive oxygen species biosynthetic process	ECO:0000316	IGI	PMID:17308309	UniProtKB:P35439	9606	regulates_o_occurs_in(CL:0002608)	20170627	P		PMID:20091784							4	4
ComplexPortal	CPX-1134	abeta-42-oligomer_human	involved_in	GO:0010524	positive regulation of calcium ion transport into cytosol	ECO:0000316	IGI	PMID:17308309	UniProtKB:P35439	9606	regulates_o_occurs_in(CL:0002608),positively_regulates(GO:1903409)	20170627	P		ComplexPortal	CPX-1134	abeta-42-oligomer_human	part_of	GO:0014069	postsynaptic density	ECO:0000304	TAS	PMID:17308309		9606		20170627	C		PMID:20141570		13					13	26
ComplexPortal	CPX-1134	abeta-42-oligomer_human	involved_in	GO:1903428	positive regulation of reactive oxygen species biosynthetic process	ECO:0000314	IDA	PMID:17308309		9606	regulates_o_occurs_in(CL:0002608),occurs_in(GO:0044307),regulates_o_occurs_in(GO:0005739)	20170627	P		ComplexPortal	CPX-1134	abeta-42-oligomer_human	enables	GO:0005109	frizzled binding	ECO:0000353	IPI	PMID:18234671	UniProtKB:Q13467|UniProtKB:Q9ULV1	9606		20180515	F		PMID:20164328		5				11		16
ComplexPortal	CPX-1134	abeta-42-oligomer_human	involved_in	GO:1903428	positive regulation of reactive oxygen species biosynthetic process	ECO:0000316	IGI	PMID:17308309	UniProtKB:P35439	9606	regulates_o_occurs_in(CL:0002608)	20170627	P		ComplexPortal	CPX-1134	abeta-42-oligomer_human	enables	GO:0035254	glutamate receptor binding	ECO:0000304	TAS	PMID:18367618		9606	negatively_regulates(GO:0099536)	20170927	F		PMID:20183869		7						7
ComplexPortal	CPX-1134	abeta-42-oligomer_human	part_of	GO:0014069	postsynaptic density	ECO:0000304	TAS	PMID:17308309		9606		20170627	C		ComplexPortal	CPX-1134	abeta-42-oligomer_human	involved_in	GO:1900272	negative regulation of long-term synaptic potentiation	ECO:0000304	TAS	PMID:18367618		9606	regulates(GO:0007611),occurs_in(UBERON:0002421),regulates_o_occurs_in(UBERON:0002421)	20170928	P		PMID:20199584		13				10		23
ComplexPortal	CPX-1134	abeta-42-oligomer_human	enables	GO:0005109	frizzled binding	ECO:0000353	IPI	PMID:18234671	UniProtKB:Q13467|UniProtKB:Q9ULV1	9606		20180515	F		ComplexPortal	CPX-1134	abeta-42-oligomer_human	involved_in	GO:1900272	negative regulation of long-term synaptic potentiation	ECO:0000303	NAS	PMID:18367618		9606	occurs_in(UBERON:0002728),regulates_o_occurs_in(UBERON:0002728)	20180118	P		PMID:20371704		4				10		14
ComplexPortal	CPX-1134	abeta-42-oligomer_human	enables	GO:0035254	glutamate receptor binding	ECO:0000304	TAS	PMID:18367618		9606	negatively_regulates(GO:0099536)	20170927	F		ComplexPortal	CPX-1134	abeta-42-oligomer_human	involved_in	GO:1900744	regulation of p38MAPK cascade	ECO:0000303	NAS	PMID:18367618		9606	occurs_in(UBERON:0002728),regulates_o_occurs_in(UBERON:0002728),regulates(GO:0060291),regulates_o_occurs_in(CL:0002609)	20180118	P		PMID:20395454		18				3	12	33
ComplexPortal	CPX-1134	abeta-42-oligomer_human	involved_in	GO:1900272	negative regulation of long-term synaptic potentiation	ECO:0000304	TAS	PMID:18367618		9606	regulates(GO:0007611),occurs_in(UBERON:0002421),regulates_o_occurs_in(UBERON:0002421)	20170928	P		ComplexPortal	CPX-1134	abeta-42-oligomer_human	NOT|involved_in	GO:0010996	response to auditory stimulus	ECO:0000316	IGI	PMID:19118188	UniProtKB:P05067:PRO_0000000092	9606		20170614	P		PMID:20445063		8				4		12
ComplexPortal	CPX-1134	abeta-42-oligomer_human	involved_in	GO:1900272	negative regulation of long-term synaptic potentiation	ECO:0000303	NAS	PMID:18367618		9606	occurs_in(UBERON:0002728),regulates_o_occurs_in(UBERON:0002728)	20180118	P		ComplexPortal	CPX-1134	abeta-42-oligomer_human	involved_in	GO:0007613	memory	ECO:0000316	IGI	PMID:19118188	UniProtKB:P05067:PRO_0000000092	9606	occurs_in(UBERON:0003881)	20170614	P		PMID:20708605		2						2
ComplexPortal	CPX-1134	abeta-42-oligomer_human	involved_in	GO:1900744	regulation of p38MAPK cascade	ECO:0000303	NAS	PMID:18367618		9606	occurs_in(UBERON:0002728),regulates_o_occurs_in(UBERON:0002728),regulates(GO:0060291),regulates_o_occurs_in(CL:0002609)	20180118	P		ComplexPortal	CPX-1134	abeta-42-oligomer_human	involved_in	GO:0008306	associative learning	ECO:0000316	IGI	PMID:19118188	UniProtKB:P05067:PRO_0000000092	9606	occurs_in(UBERON:0003881)	20170614	P		PMID:20739563		11				3		14
ComplexPortal	CPX-1134	abeta-42-oligomer_human	NOT|involved_in	GO:0010996	response to auditory stimulus	ECO:0000316	IGI	PMID:19118188	UniProtKB:P05067:PRO_0000000092	9606		20170614	P		ComplexPortal	CPX-1134	abeta-42-oligomer_human	involved_in	GO:0008306	associative learning	ECO:0000316	IGI	PMID:19118188	UniProtKB:P05067:PRO_0000000092,UniProtKB:P49582	9606	occurs_in(UBERON:0002421),happens_during(GO:1903048)	20170614	P		PMID:20943921						3		3
ComplexPortal	CPX-1134	abeta-42-oligomer_human	involved_in	GO:0007613	memory	ECO:0000316	IGI	PMID:19118188	UniProtKB:P05067:PRO_0000000092	9606	occurs_in(UBERON:0003881)	20170614	P		ComplexPortal	CPX-1134	abeta-42-oligomer_human	involved_in	GO:1900272	negative regulation of long-term synaptic potentiation	ECO:0000316	IGI	PMID:19118188	UniProtKB:P05067:PRO_0000000092	9606	occurs_in(UBERON:0003881)	20170614	P		PMID:20974225		2				4		6
ComplexPortal	CPX-1134	abeta-42-oligomer_human	involved_in	GO:0008306	associative learning	ECO:0000316	IGI	PMID:19118188	UniProtKB:P05067:PRO_0000000092	9606	occurs_in(UBERON:0003881)	20170614	P		ComplexPortal	CPX-1134	abeta-42-oligomer_human	involved_in	GO:1900273	positive regulation of long-term synaptic potentiation	ECO:0000316	IGI	PMID:19118188	UniProtKB:P05067:PRO_0000000092	9606	occurs_in(UBERON:0003881)	20170614	P		PMID:21113149		12				9	4	25
ComplexPortal	CPX-1134	abeta-42-oligomer_human	involved_in	GO:0008306	associative learning	ECO:0000316	IGI	PMID:19118188	UniProtKB:P05067:PRO_0000000092,UniProtKB:P49582	9606	occurs_in(UBERON:0002421),happens_during(GO:1903048)	20170614	P		ComplexPortal	CPX-1134	abeta-42-oligomer_human	involved_in	GO:1900273	positive regulation of long-term synaptic potentiation	ECO:0000316	IGI	PMID:19118188	UniProtKB:P05067:PRO_0000000092,UniProtKB:P49582	9606	occurs_in(UBERON:0002421),happens_during(GO:1903048)	20170614	P		PMID:21126803		14				1		15
ComplexPortal	CPX-1134	abeta-42-oligomer_human	involved_in	GO:1900272	negative regulation of long-term synaptic potentiation	ECO:0000316	IGI	PMID:19118188	UniProtKB:P05067:PRO_0000000092	9606	occurs_in(UBERON:0003881)	20170614	P		ComplexPortal	CPX-1134	abeta-42-oligomer_human	involved_in	GO:2000463	positive regulation of excitatory postsynaptic potential	ECO:0000316	IGI	PMID:19118188	UniProtKB:P05067:PRO_0000000092,UniProtKB:P49582	9606	occurs_in(UBERON:0002421),happens_during(GO:1903048)	20170614	P		PMID:21215488							1	1
ComplexPortal	CPX-1134	abeta-42-oligomer_human	involved_in	GO:1900273	positive regulation of long-term synaptic potentiation	ECO:0000316	IGI	PMID:19118188	UniProtKB:P05067:PRO_0000000092	9606	occurs_in(UBERON:0003881)	20170614	P		ComplexPortal	CPX-1134	abeta-42-oligomer_human	involved_in	GO:1903048	regulation of acetylcholine-gated cation channel activity	ECO:0000316	IGI	PMID:19118188	UniProtKB:P05067:PRO_0000000092,UniProtKB:P49582	9606	occurs_in(UBERON:0002421),has_regulation_target(UniProtKB:P49582),part_of(GO:1900273)	20180223	P		PMID:21221849		5						5
ComplexPortal	CPX-1134	abeta-42-oligomer_human	involved_in	GO:1900273	positive regulation of long-term synaptic potentiation	ECO:0000316	IGI	PMID:19118188	UniProtKB:P05067:PRO_0000000092,UniProtKB:P49582	9606	occurs_in(UBERON:0002421),happens_during(GO:1903048)	20170614	P		ComplexPortal	CPX-1134	abeta-42-oligomer_human	colocalizes_with	GO:0030425	dendrite	ECO:0000314	IDA	PMID:19188609		9606	part_of(CL:0002608),part_of(GO:0045202)	20170628	C		PMID:21237226		16						16
ComplexPortal	CPX-1134	abeta-42-oligomer_human	involved_in	GO:2000463	positive regulation of excitatory postsynaptic potential	ECO:0000316	IGI	PMID:19118188	UniProtKB:P05067:PRO_0000000092,UniProtKB:P49582	9606	occurs_in(UBERON:0002421),happens_during(GO:1903048)	20170614	P		ComplexPortal	CPX-1134	abeta-42-oligomer_human	colocalizes_with	GO:0043197	dendritic spine	ECO:0000304	TAS	PMID:19188609		9606		20170628	C		PMID:21289173		15				7		22
ComplexPortal	CPX-1134	abeta-42-oligomer_human	involved_in	GO:1903048	regulation of acetylcholine-gated cation channel activity	ECO:0000316	IGI	PMID:19118188	UniProtKB:P05067:PRO_0000000092,UniProtKB:P49582	9606	occurs_in(UBERON:0002421),has_regulation_target(UniProtKB:P49582),part_of(GO:1900273)	20180223	P		ComplexPortal	CPX-1134	abeta-42-oligomer_human	colocalizes_with	GO:0045202	synapse	ECO:0000314	IDA	PMID:19188609		9606	part_of(CL:0002608),part_of(GO:0030425)	20170628	C		PMID:2142460		5						5
ComplexPortal	CPX-1134	abeta-42-oligomer_human	colocalizes_with	GO:0030425	dendrite	ECO:0000314	IDA	PMID:19188609		9606	part_of(CL:0002608),part_of(GO:0045202)	20170628	C		ComplexPortal	CPX-1134	abeta-42-oligomer_human	involved_in	GO:1903076	regulation of protein localization to plasma membrane	ECO:0000314	IDA	PMID:19188609		9606	regulates_o_occurs_in(CL:0002608),has_target_start_location(GO:0032590),transports_or_maintains_localization_of(UniProtKB:P06213),has_target_end_location(GO:0032809),causally_upstream_of(GO:1902951)	20170628	P		PMID:21540349							15	15
ComplexPortal	CPX-1134	abeta-42-oligomer_human	colocalizes_with	GO:0043197	dendritic spine	ECO:0000304	TAS	PMID:19188609		9606		20170628	C		ComplexPortal	CPX-1134	abeta-42-oligomer_human	involved_in	GO:1903076	regulation of protein localization to plasma membrane	ECO:0000316	IGI	PMID:19188609	UniProtKB:P01308	9606	occurs_in(CL:0002608),has_target_start_location(GO:0032590),transports_or_maintains_localization_of(UniProtKB:P06213),has_target_end_location(GO:0032809),causally_upstream_of(GO:1902951)	20170628	P		PMID:21593310		2					1	3
ComplexPortal	CPX-1134	abeta-42-oligomer_human	colocalizes_with	GO:0045202	synapse	ECO:0000314	IDA	PMID:19188609		9606	part_of(CL:0002608),part_of(GO:0030425)	20170628	C		ComplexPortal	CPX-1134	abeta-42-oligomer_human	involved_in	GO:1903076	regulation of protein localization to plasma membrane	ECO:0000316	IGI	PMID:19188609	UniProtKB:P08413,UniProtKB:P11275,UniProtKB:P11730,UniProtKB:P15791	9606	occurs_in(CL:0002608),has_target_start_location(GO:0032590),transports_or_maintains_localization_of(UniProtKB:P06213),has_target_end_location(GO:0032809)|occurs_in(CL:0002608),has_target_start_location(GO:0032590),transports_or_maintains_localization_of(GO:0017146),has_target_end_location(GO:0032809)	20170628	P		PMID:21768291		10				5		15
ComplexPortal	CPX-1134	abeta-42-oligomer_human	involved_in	GO:1903076	regulation of protein localization to plasma membrane	ECO:0000314	IDA	PMID:19188609		9606	regulates_o_occurs_in(CL:0002608),has_target_start_location(GO:0032590),transports_or_maintains_localization_of(UniProtKB:P06213),has_target_end_location(GO:0032809),causally_upstream_of(GO:1902951)	20170628	P		ComplexPortal	CPX-1134	abeta-42-oligomer_human	involved_in	GO:1903076	regulation of protein localization to plasma membrane	ECO:0000316	IGI	PMID:19188609	UniProtKB:P19139	9606	occurs_in(CL:0002608),has_target_start_location(GO:0032590),transports_or_maintains_localization_of(UniProtKB:P06213),has_target_end_location(GO:0032809)|occurs_in(CL:0002608),has_target_start_location(GO:0032590),transports_or_maintains_localization_of(GO:0017146),has_target_end_location(GO:0032809)	20170628	P		PMID:21803450		15						15
ComplexPortal	CPX-1134	abeta-42-oligomer_human	involved_in	GO:1903076	regulation of protein localization to plasma membrane	ECO:0000316	IGI	PMID:19188609	UniProtKB:P01308	9606	occurs_in(CL:0002608),has_target_start_location(GO:0032590),transports_or_maintains_localization_of(UniProtKB:P06213),has_target_end_location(GO:0032809),causally_upstream_of(GO:1902951)	20170628	P		ComplexPortal	CPX-1134	abeta-42-oligomer_human	involved_in	GO:1903428	positive regulation of reactive oxygen species biosynthetic process	ECO:0000316	IGI	PMID:19188609	UniProtKB:P05067:PRO_0000000092	9606	occurs_in(CL:0002608),negatively_regulates(GO:1990535)	20170628	P		PMID:21838267		19						19
ComplexPortal	CPX-1134	abeta-42-oligomer_human	involved_in	GO:1903076	regulation of protein localization to plasma membrane	ECO:0000316	IGI	PMID:19188609	UniProtKB:P08413,UniProtKB:P11275,UniProtKB:P11730,UniProtKB:P15791	9606	occurs_in(CL:0002608),has_target_start_location(GO:0032590),transports_or_maintains_localization_of(UniProtKB:P06213),has_target_end_location(GO:0032809)|occurs_in(CL:0002608),has_target_start_location(GO:0032590),transports_or_maintains_localization_of(GO:0017146),has_target_end_location(GO:0032809)	20170628	P		ComplexPortal	CPX-1134	abeta-42-oligomer_human	colocalizes_with	GO:0005635	nuclear envelope	ECO:0000314	IDA	PMID:19406747		9606	adjacent_to(GO:0106003),exists_during(GO:0008286),adjacent_to(GO:0005899)	20170720	C		PMID:21857966		12				10		22
ComplexPortal	CPX-1134	abeta-42-oligomer_human	involved_in	GO:1903076	regulation of protein localization to plasma membrane	ECO:0000316	IGI	PMID:19188609	UniProtKB:P19139	9606	occurs_in(CL:0002608),has_target_start_location(GO:0032590),transports_or_maintains_localization_of(UniProtKB:P06213),has_target_end_location(GO:0032809)|occurs_in(CL:0002608),has_target_start_location(GO:0032590),transports_or_maintains_localization_of(GO:0017146),has_target_end_location(GO:0032809)	20170628	P		ComplexPortal	CPX-1134	abeta-42-oligomer_human	colocalizes_with	GO:0009897	external side of plasma membrane	ECO:0000314	IDA	PMID:19406747		9606	part_of(GO:0032590),part_of(CL:0002608)	20170720	C		PMID:21878370						4		4
ComplexPortal	CPX-1134	abeta-42-oligomer_human	involved_in	GO:1903428	positive regulation of reactive oxygen species biosynthetic process	ECO:0000316	IGI	PMID:19188609	UniProtKB:P05067:PRO_0000000092	9606	occurs_in(CL:0002608),negatively_regulates(GO:1990535)	20170628	P		ComplexPortal	CPX-1134	abeta-42-oligomer_human	colocalizes_with	GO:0031981	nuclear lumen	ECO:0000314	IDA	PMID:19406747		9606	adjacent_to(GO:0106003),exists_during(GO:0008286),adjacent_to(GO:0005899)	20170720	C		PMID:21883149		13						13
ComplexPortal	CPX-1134	abeta-42-oligomer_human	colocalizes_with	GO:0005635	nuclear envelope	ECO:0000314	IDA	PMID:19406747		9606	adjacent_to(GO:0106003),exists_during(GO:0008286),adjacent_to(GO:0005899)	20170720	C		ComplexPortal	CPX-1134	abeta-42-oligomer_human	colocalizes_with	GO:0031981	nuclear lumen	ECO:0000314	IDA	PMID:19406747		9606	part_of(CL:0000127),exists_during(GO:0097242),exists_during(GO:0008286)	20170720	C		PMID:22138302		17						17
ComplexPortal	CPX-1134	abeta-42-oligomer_human	colocalizes_with	GO:0009897	external side of plasma membrane	ECO:0000314	IDA	PMID:19406747		9606	part_of(GO:0032590),part_of(CL:0002608)	20170720	C		ComplexPortal	CPX-1134	abeta-42-oligomer_human	colocalizes_with	GO:0032590	dendrite membrane	ECO:0000314	IDA	PMID:19406747		9606	part_of(GO:0009897),part_of(CL:0002608)	20170720	C		PMID:22179788		9						9
ComplexPortal	CPX-1134	abeta-42-oligomer_human	colocalizes_with	GO:0031981	nuclear lumen	ECO:0000314	IDA	PMID:19406747		9606	adjacent_to(GO:0106003),exists_during(GO:0008286),adjacent_to(GO:0005899)	20170720	C		ComplexPortal	CPX-1134	abeta-42-oligomer_human	colocalizes_with	GO:0043025	neuronal cell body	ECO:0000314	IDA	PMID:19406747		9606	part_of(CL:0002608),exists_during(GO:0008286)	20170720	C		PMID:2218531		4						4
ComplexPortal	CPX-1134	abeta-42-oligomer_human	colocalizes_with	GO:0031981	nuclear lumen	ECO:0000314	IDA	PMID:19406747		9606	part_of(CL:0000127),exists_during(GO:0097242),exists_during(GO:0008286)	20170720	C		ComplexPortal	CPX-1134	abeta-42-oligomer_human	colocalizes_with	GO:0044297	cell body	ECO:0000314	IDA	PMID:19406747		9606	part_of(CL:0000127),exists_during(GO:0097242),exists_during(GO:0008286),part_of(GO:0048471)|part_of(CL:0000127),exists_during(GO:0097242),exists_during(GO:0008286),part_of(GO:0031981)	20170720	C		PMID:22198949		18				14		32
ComplexPortal	CPX-1134	abeta-42-oligomer_human	colocalizes_with	GO:0032590	dendrite membrane	ECO:0000314	IDA	PMID:19406747		9606	part_of(GO:0009897),part_of(CL:0002608)	20170720	C		ComplexPortal	CPX-1134	abeta-42-oligomer_human	colocalizes_with	GO:0048471	perinuclear region of cytoplasm	ECO:0000314	IDA	PMID:19406747		9606	part_of(CL:0000127),exists_during(GO:0097242),exists_during(GO:0008286)	20170720	C		PMID:22293988		3						3
ComplexPortal	CPX-1134	abeta-42-oligomer_human	colocalizes_with	GO:0043025	neuronal cell body	ECO:0000314	IDA	PMID:19406747		9606	part_of(CL:0002608),exists_during(GO:0008286)	20170720	C		ComplexPortal	CPX-1134	abeta-42-oligomer_human	enables	GO:0005158	insulin receptor binding	ECO:0000353	IPI	PMID:19406747	UniProtKB:P06213	9606	part_of(GO:0008286)	20170720	F		PMID:22383525		5				8		13
ComplexPortal	CPX-1134	abeta-42-oligomer_human	colocalizes_with	GO:0044297	cell body	ECO:0000314	IDA	PMID:19406747		9606	part_of(CL:0000127),exists_during(GO:0097242),exists_during(GO:0008286),part_of(GO:0048471)|part_of(CL:0000127),exists_during(GO:0097242),exists_during(GO:0008286),part_of(GO:0031981)	20170720	C		ComplexPortal	CPX-1134	abeta-42-oligomer_human	enables	GO:0035255	ionotropic glutamate receptor binding	ECO:0000315	IMP	PMID:20032460		9606	occurs_in(CL:0002608),has_input(UniProtKB:P19491)	20170628	F		PMID:22387731		1					5	6
ComplexPortal	CPX-1134	abeta-42-oligomer_human	colocalizes_with	GO:0048471	perinuclear region of cytoplasm	ECO:0000314	IDA	PMID:19406747		9606	part_of(CL:0000127),exists_during(GO:0097242),exists_during(GO:0008286)	20170720	C		ComplexPortal	CPX-1134	abeta-42-oligomer_human	enables	GO:0035255	ionotropic glutamate receptor binding	ECO:0000353	IPI	PMID:20032460	UniProtKB:P19490	9606	occurs_in(CL:0002608)	20170628	F		PMID:22438044						6		6
ComplexPortal	CPX-1134	abeta-42-oligomer_human	enables	GO:0005158	insulin receptor binding	ECO:0000353	IPI	PMID:19406747	UniProtKB:P06213	9606	part_of(GO:0008286)	20170720	F		ComplexPortal	CPX-1134	abeta-42-oligomer_human	enables	GO:0035255	ionotropic glutamate receptor binding	ECO:0000353	IPI	PMID:20032460	UniProtKB:P19491,UniProtKB:P19492	9606	occurs_in(CL:0002608),occurs_at(GO:0009897)	20170628	F		PMID:22500019		119					4	123
ComplexPortal	CPX-1134	abeta-42-oligomer_human	enables	GO:0035255	ionotropic glutamate receptor binding	ECO:0000315	IMP	PMID:20032460		9606	occurs_in(CL:0002608),has_input(UniProtKB:P19491)	20170628	F		ComplexPortal	CPX-1134	abeta-42-oligomer_human	involved_in	GO:0002092	positive regulation of receptor internalization	ECO:0000314	IDA	PMID:20032460		9606	occurs_in(CL:0002608),has_regulation_target(UniProtKB:P19490)|occurs_in(CL:0002608),has_regulation_target(UniProtKB:P19491),has_regulation_target(UniProtKB:P19492)	20170628	P		PMID:2251254		2						2
ComplexPortal	CPX-1134	abeta-42-oligomer_human	enables	GO:0035255	ionotropic glutamate receptor binding	ECO:0000353	IPI	PMID:20032460	UniProtKB:P19490	9606	occurs_in(CL:0002608)	20170628	F		ComplexPortal	CPX-1134	abeta-42-oligomer_human	involved_in	GO:1905668	positive regulation of protein localization to endosome	ECO:0000314	IDA	PMID:20032460		9606	occurs_in(CL:0002608),has_target_start_location(GO:0005886),has_target_end_location(GO:0005768),has_regulation_target(UniProtKB:P19492),has_regulation_target(UniProtKB:P19491)	20170628	P		PMID:22635104		8						8
ComplexPortal	CPX-1134	abeta-42-oligomer_human	enables	GO:0035255	ionotropic glutamate receptor binding	ECO:0000353	IPI	PMID:20032460	UniProtKB:P19491,UniProtKB:P19492	9606	occurs_in(CL:0002608),occurs_at(GO:0009897)	20170628	F		ComplexPortal	CPX-1134	abeta-42-oligomer_human	part_of	GO:0005829	cytosol	ECO:0000314	IDA	PMID:20032460		9606		20170628	C		PMID:22683681		33				20	2	55
ComplexPortal	CPX-1134	abeta-42-oligomer_human	involved_in	GO:0002092	positive regulation of receptor internalization	ECO:0000314	IDA	PMID:20032460		9606	occurs_in(CL:0002608),has_regulation_target(UniProtKB:P19490)|occurs_in(CL:0002608),has_regulation_target(UniProtKB:P19491),has_regulation_target(UniProtKB:P19492)	20170628	P		ComplexPortal	CPX-1134	abeta-42-oligomer_human	part_of	GO:0031232	extrinsic component of external side of plasma membrane	ECO:0000314	IDA	PMID:20032460		9606	part_of(GO:0043197),part_of(CL:0002608),part_of(GO:0060076)	20170628	C		PMID:22718532		1				1		2
ComplexPortal	CPX-1134	abeta-42-oligomer_human	involved_in	GO:1905668	positive regulation of protein localization to endosome	ECO:0000314	IDA	PMID:20032460		9606	occurs_in(CL:0002608),has_target_start_location(GO:0005886),has_target_end_location(GO:0005768),has_regulation_target(UniProtKB:P19492),has_regulation_target(UniProtKB:P19491)	20170628	P		ComplexPortal	CPX-1134	abeta-42-oligomer_human	part_of	GO:0043197	dendritic spine	ECO:0000314	IDA	PMID:20032460		9606	part_of(CL:0002608)	20170628	C		PMID:22750515		3					2	5
ComplexPortal	CPX-1134	abeta-42-oligomer_human	part_of	GO:0005829	cytosol	ECO:0000314	IDA	PMID:20032460		9606		20170628	C		ComplexPortal	CPX-1134	abeta-42-oligomer_human	part_of	GO:0044309	neuron spine	ECO:0000314	IDA	PMID:20032460		9606	part_of(CL:0002608)	20170628	C		PMID:22820466		3				19	2	24
ComplexPortal	CPX-1134	abeta-42-oligomer_human	part_of	GO:0031232	extrinsic component of external side of plasma membrane	ECO:0000314	IDA	PMID:20032460		9606	part_of(GO:0043197),part_of(CL:0002608),part_of(GO:0060076)	20170628	C		ComplexPortal	CPX-1134	abeta-42-oligomer_human	part_of	GO:0060076	excitatory synapse	ECO:0000314	IDA	PMID:20032460		9606	part_of(GO:0043197),part_of(CL:0002608)	20170628	C		PMID:22998873		5				6		11
ComplexPortal	CPX-1134	abeta-42-oligomer_human	part_of	GO:0043197	dendritic spine	ECO:0000314	IDA	PMID:20032460		9606	part_of(CL:0002608)	20170628	C		ComplexPortal	CPX-1134	abeta-42-oligomer_human	part_of	GO:0098843	postsynaptic endocytic zone	ECO:0000303	NAS	PMID:20032460		9606	part_of(GO:0060076)	20170628	C		PMID:23106396		12						12
ComplexPortal	CPX-1134	abeta-42-oligomer_human	part_of	GO:0044309	neuron spine	ECO:0000314	IDA	PMID:20032460		9606	part_of(CL:0002608)	20170628	C		ComplexPortal	CPX-1134	abeta-42-oligomer_human	involved_in	GO:0046330	positive regulation of JNK cascade	ECO:0000316	IGI	PMID:20739563	UniProtKB:P10749,UniProtKB:Q15109	9606	occurs_in(UBERON:0002728),regulates(GO:0060292)	20170628	P		PMID:23152628		8				3		11
ComplexPortal	CPX-1134	abeta-42-oligomer_human	part_of	GO:0060076	excitatory synapse	ECO:0000314	IDA	PMID:20032460		9606	part_of(GO:0043197),part_of(CL:0002608)	20170628	C		ComplexPortal	CPX-1134	abeta-42-oligomer_human	involved_in	GO:0050725	positive regulation of interleukin-1 beta biosynthetic process	ECO:0000314	IDA	PMID:20739563		9606	occurs_in(UBERON:0002728)	20170628	P		PMID:23164821		40				4	9	53
ComplexPortal	CPX-1134	abeta-42-oligomer_human	part_of	GO:0098843	postsynaptic endocytic zone	ECO:0000303	NAS	PMID:20032460		9606	part_of(GO:0060076)	20170628	C		ComplexPortal	CPX-1134	abeta-42-oligomer_human	involved_in	GO:1900453	negative regulation of long term synaptic depression	ECO:0000314	IDA	PMID:20739563		9606	occurs_in(UBERON:0002728)	20170628	P		PMID:23270857						2		2
ComplexPortal	CPX-1134	abeta-42-oligomer_human	involved_in	GO:0046330	positive regulation of JNK cascade	ECO:0000316	IGI	PMID:20739563	UniProtKB:P10749,UniProtKB:Q15109	9606	occurs_in(UBERON:0002728),regulates(GO:0060292)	20170628	P		ComplexPortal	CPX-1134	abeta-42-oligomer_human	involved_in	GO:1900453	negative regulation of long term synaptic depression	ECO:0000316	IGI	PMID:20739563	UniProtKB:Q15109	9606	occurs_in(UBERON:0002728),occurs_in(CL:0000129)	20170628	P		PMID:23362255		3				2		5
ComplexPortal	CPX-1134	abeta-42-oligomer_human	involved_in	GO:0050725	positive regulation of interleukin-1 beta biosynthetic process	ECO:0000314	IDA	PMID:20739563		9606	occurs_in(UBERON:0002728)	20170628	P		ComplexPortal	CPX-1134	abeta-42-oligomer_human	involved_in	GO:1900745	positive regulation of p38MAPK cascade	ECO:0000316	IGI	PMID:20739563	UniProtKB:P10749,UniProtKB:Q15109	9606	occurs_in(UBERON:0002728),regulates(GO:0060292)	20170628	P		PMID:23376566		8						8
ComplexPortal	CPX-1134	abeta-42-oligomer_human	involved_in	GO:1900453	negative regulation of long term synaptic depression	ECO:0000314	IDA	PMID:20739563		9606	occurs_in(UBERON:0002728)	20170628	P		ComplexPortal	CPX-1134	abeta-42-oligomer_human	involved_in	GO:0061907	negative regulation of AMPA receptor activity	ECO:0000314	IDA	PMID:20739563		9606	regulates_o_occurs_in(UBERON:0022337),regulates_o_occurs_in(UBERON:0022327)	20170703	P		PMID:23386614		30				3	2	35
ComplexPortal	CPX-1134	abeta-42-oligomer_human	involved_in	GO:1900453	negative regulation of long term synaptic depression	ECO:0000316	IGI	PMID:20739563	UniProtKB:Q15109	9606	occurs_in(UBERON:0002728),occurs_in(CL:0000129)	20170628	P		ComplexPortal	CPX-1134	abeta-42-oligomer_human	enables	GO:0046875	ephrin receptor binding	ECO:0000353	IPI	PMID:21113149	UniProtKB:A0A0G2JY48	9606	occurs_in(CL:0000540)	20170620	F		PMID:23399914		2						2
ComplexPortal	CPX-1134	abeta-42-oligomer_human	involved_in	GO:1900745	positive regulation of p38MAPK cascade	ECO:0000316	IGI	PMID:20739563	UniProtKB:P10749,UniProtKB:Q15109	9606	occurs_in(UBERON:0002728),regulates(GO:0060292)	20170628	P		ComplexPortal	CPX-1134	abeta-42-oligomer_human	enables	GO:0046875	ephrin receptor binding	ECO:0000353	IPI	PMID:21113149	UniProtKB:P54763	9606		20170620	F		PMID:23400999		5						5
ComplexPortal	CPX-1134	abeta-42-oligomer_human	involved_in	GO:0061907	negative regulation of AMPA receptor activity	ECO:0000314	IDA	PMID:20739563		9606	regulates_o_occurs_in(UBERON:0022337),regulates_o_occurs_in(UBERON:0022327)	20170703	P		ComplexPortal	CPX-1134	abeta-42-oligomer_human	involved_in	GO:0010628	positive regulation of gene expression	ECO:0000314	IDA	PMID:21857966		9606	regulates_expression_of(ENSEMBL:ENSG00000163251),regulates_o_occurs_in(CL:0002609)|regulates_expression_of(ENSEMBL:ENSG00000114251),regulates_o_occurs_in(CL:0002609)	20171220	P		PMID:23640054		5				1		6
ComplexPortal	CPX-1134	abeta-42-oligomer_human	enables	GO:0046875	ephrin receptor binding	ECO:0000353	IPI	PMID:21113149	UniProtKB:A0A0G2JY48	9606	occurs_in(CL:0000540)	20170620	F		ComplexPortal	CPX-1134	abeta-42-oligomer_human	involved_in	GO:0050731	positive regulation of peptidyl-tyrosine phosphorylation	ECO:0000314	IDA	PMID:21857966		9606	has_regulation_target(UniProtKB:Q9UQM7),regulates_o_occurs_in(CL:0002609)	20171220	P		PMID:23845000		1				2		3
ComplexPortal	CPX-1134	abeta-42-oligomer_human	enables	GO:0046875	ephrin receptor binding	ECO:0000353	IPI	PMID:21113149	UniProtKB:P54763	9606		20170620	F		ComplexPortal	CPX-1134	abeta-42-oligomer_human	involved_in	GO:1903207	regulation of hydrogen peroxide-induced neuron death	ECO:0000314	IDA	PMID:21857966		9606	regulates_o_occurs_in(CL:0002609)	20171220	P		PMID:23918388						6		6
ComplexPortal	CPX-1134	abeta-42-oligomer_human	involved_in	GO:0010628	positive regulation of gene expression	ECO:0000314	IDA	PMID:21857966		9606	regulates_expression_of(ENSEMBL:ENSG00000163251),regulates_o_occurs_in(CL:0002609)|regulates_expression_of(ENSEMBL:ENSG00000114251),regulates_o_occurs_in(CL:0002609)	20171220	P		ComplexPortal	CPX-1134	abeta-42-oligomer_human	involved_in	GO:0050718	positive regulation of interleukin-1 beta secretion	ECO:0000316	IGI	PMID:21857966	UniProtKB:P22725,UniProtKB:Q9EQD0	9606	regulates_o_occurs_in(CL:0002609)	20171221	P		PMID:23921129		26				7	3	36
ComplexPortal	CPX-1134	abeta-42-oligomer_human	involved_in	GO:0050731	positive regulation of peptidyl-tyrosine phosphorylation	ECO:0000314	IDA	PMID:21857966		9606	has_regulation_target(UniProtKB:Q9UQM7),regulates_o_occurs_in(CL:0002609)	20171220	P		ComplexPortal	CPX-1134	abeta-42-oligomer_human	involved_in	GO:0050727	regulation of inflammatory response	ECO:0000314	IDA	PMID:21857966		9606	regulates_o_occurs_in(CL:0002609),regulates(GO:0070997)	20171221	P		PMID:23959425		6						6
ComplexPortal	CPX-1134	abeta-42-oligomer_human	involved_in	GO:1903207	regulation of hydrogen peroxide-induced neuron death	ECO:0000314	IDA	PMID:21857966		9606	regulates_o_occurs_in(CL:0002609)	20171220	P		ComplexPortal	CPX-1134	abeta-42-oligomer_human	involved_in	GO:1904469	positive regulation of tumor necrosis factor secretion	ECO:0000316	IGI	PMID:21857966	UniProtKB:P22725,UniProtKB:Q9EQD0	9606	regulates_o_occurs_in(CL:0002609),has_regulation_target(UniProtKB:P01375)	20171221	P		PMID:23962722		5				2		7
ComplexPortal	CPX-1134	abeta-42-oligomer_human	involved_in	GO:0050718	positive regulation of interleukin-1 beta secretion	ECO:0000316	IGI	PMID:21857966	UniProtKB:P22725,UniProtKB:Q9EQD0	9606	regulates_o_occurs_in(CL:0002609)	20171221	P		ComplexPortal	CPX-1134	abeta-42-oligomer_human	involved_in	GO:2000052	positive regulation of non-canonical Wnt signaling pathway	ECO:0000316	IGI	PMID:21857966	UniProtKB:P22725|UniProtKB:Q9EQD0	9606	regulates_o_occurs_in(CL:0002609)	20171221	P		PMID:24012003		33				11	5	49
ComplexPortal	CPX-1134	abeta-42-oligomer_human	involved_in	GO:0050727	regulation of inflammatory response	ECO:0000314	IDA	PMID:21857966		9606	regulates_o_occurs_in(CL:0002609),regulates(GO:0070997)	20171221	P		ComplexPortal	CPX-1134	abeta-42-oligomer_human	enables	GO:0035663	Toll-like receptor 2 binding	ECO:0000353	IPI	PMID:22198949	UniProtKB:O60603	9606	occurs_in(CL:0000129)	20170628	F		PMID:24052308		21				13	1	35
ComplexPortal	CPX-1134	abeta-42-oligomer_human	involved_in	GO:1904469	positive regulation of tumor necrosis factor secretion	ECO:0000316	IGI	PMID:21857966	UniProtKB:P22725,UniProtKB:Q9EQD0	9606	regulates_o_occurs_in(CL:0002609),has_regulation_target(UniProtKB:P01375)	20171221	P		ComplexPortal	CPX-1134	abeta-42-oligomer_human	enables	GO:0035663	Toll-like receptor 2 binding	ECO:0000353	IPI	PMID:22198949	UniProtKB:Q9QUN7	9606	occurs_in(CL:0000129)	20170628	F		PMID:24217950		25						25
ComplexPortal	CPX-1134	abeta-42-oligomer_human	involved_in	GO:2000052	positive regulation of non-canonical Wnt signaling pathway	ECO:0000316	IGI	PMID:21857966	UniProtKB:P22725|UniProtKB:Q9EQD0	9606	regulates_o_occurs_in(CL:0002609)	20171221	P		ComplexPortal	CPX-1134	abeta-42-oligomer_human	involved_in	GO:0030838	positive regulation of actin filament polymerization	ECO:0000316	IGI	PMID:22198949	UniProtKB:Q9QUN7	9606	part_of(GO:1904646),regulates_o_occurs_in(CL:0000235),causally_upstream_of(GO:0006909)	20170628	P		PMID:24251416		7					6	13
ComplexPortal	CPX-1134	abeta-42-oligomer_human	enables	GO:0035663	Toll-like receptor 2 binding	ECO:0000353	IPI	PMID:22198949	UniProtKB:O60603	9606	occurs_in(CL:0000129)	20170628	F		ComplexPortal	CPX-1134	abeta-42-oligomer_human	involved_in	GO:0050718	positive regulation of interleukin-1 beta secretion	ECO:0000316	IGI	PMID:22198949	UniProtKB:Q9QUN7	9606	regulates_o_occurs_in(CL:0000113),has_regulation_target(UniProtKB:P01584)	20170628	P		PMID:24286867						23		23
ComplexPortal	CPX-1134	abeta-42-oligomer_human	enables	GO:0035663	Toll-like receptor 2 binding	ECO:0000353	IPI	PMID:22198949	UniProtKB:Q9QUN7	9606	occurs_in(CL:0000129)	20170628	F		ComplexPortal	CPX-1134	abeta-42-oligomer_human	involved_in	GO:0050729	positive regulation of inflammatory response	ECO:0000316	IGI	PMID:22198949	UniProtKB:Q9QUN7	9606	regulates_o_occurs_in(CL:0000113)	20170628	P		PMID:24305806		19				6		25
ComplexPortal	CPX-1134	abeta-42-oligomer_human	involved_in	GO:0030838	positive regulation of actin filament polymerization	ECO:0000316	IGI	PMID:22198949	UniProtKB:Q9QUN7	9606	part_of(GO:1904646),regulates_o_occurs_in(CL:0000235),causally_upstream_of(GO:0006909)	20170628	P		ComplexPortal	CPX-1134	abeta-42-oligomer_human	involved_in	GO:1904469	positive regulation of tumor necrosis factor secretion	ECO:0000316	IGI	PMID:22198949	UniProtKB:Q9QUN7	9606	regulates_o_occurs_in(CL:0000113),has_regulation_target(UniProtKB:P01375)	20170628	P		PMID:24305823		3				1		4
ComplexPortal	CPX-1134	abeta-42-oligomer_human	involved_in	GO:0050718	positive regulation of interleukin-1 beta secretion	ECO:0000316	IGI	PMID:22198949	UniProtKB:Q9QUN7	9606	regulates_o_occurs_in(CL:0000113),has_regulation_target(UniProtKB:P01584)	20170628	P		ComplexPortal	CPX-1134	abeta-42-oligomer_human	involved_in	GO:2000484	positive regulation of interleukin-8 secretion	ECO:0000316	IGI	PMID:22198949	UniProtKB:O60603	9606	occurs_in(CL:0002321),occurs_in(CL:1000497)	20170628	P		PMID:24327345		26				4		30
ComplexPortal	CPX-1134	abeta-42-oligomer_human	involved_in	GO:0050729	positive regulation of inflammatory response	ECO:0000316	IGI	PMID:22198949	UniProtKB:Q9QUN7	9606	regulates_o_occurs_in(CL:0000113)	20170628	P		ComplexPortal	CPX-1134	abeta-42-oligomer_human	involved_in	GO:0010628	positive regulation of gene expression	ECO:0000316	IGI	PMID:22500019	ComplexPortal:CPX-3187|UniProtKB:O60896,UniProtKB:P30988	9606	regulates_expression_of(ENSEMBL:ENSG00000170345)	20170628	P		PMID:24383081		2						2
ComplexPortal	CPX-1134	abeta-42-oligomer_human	involved_in	GO:1904469	positive regulation of tumor necrosis factor secretion	ECO:0000316	IGI	PMID:22198949	UniProtKB:Q9QUN7	9606	regulates_o_occurs_in(CL:0000113),has_regulation_target(UniProtKB:P01375)	20170628	P		ComplexPortal	CPX-1134	abeta-42-oligomer_human	involved_in	GO:0010628	positive regulation of gene expression	ECO:0000316	IGI	PMID:22500019	UniProtKB:O60896,UniProtKB:P05067:PRO_0000000092	9606	regulates_expression_of(ENSEMBL:ENSG00000170345)	20170628	P		PMID:24412220		12				4		16
ComplexPortal	CPX-1134	abeta-42-oligomer_human	involved_in	GO:2000484	positive regulation of interleukin-8 secretion	ECO:0000316	IGI	PMID:22198949	UniProtKB:O60603	9606	occurs_in(CL:0002321),occurs_in(CL:1000497)	20170628	P		ComplexPortal	CPX-1134	abeta-42-oligomer_human	involved_in	GO:0010739	positive regulation of protein kinase A signaling	ECO:0000316	IGI	PMID:22500019	ComplexPortal:CPX-3187|UniProtKB:O60896,UniProtKB:P30988	9606	has_regulation_target(UniProtKB:P13861)	20170628	P		PMID:24607229		2				4	1	7
ComplexPortal	CPX-1134	abeta-42-oligomer_human	involved_in	GO:0010628	positive regulation of gene expression	ECO:0000316	IGI	PMID:22500019	ComplexPortal:CPX-3187|UniProtKB:O60896,UniProtKB:P30988	9606	regulates_expression_of(ENSEMBL:ENSG00000170345)	20170628	P		ComplexPortal	CPX-1134	abeta-42-oligomer_human	involved_in	GO:0010739	positive regulation of protein kinase A signaling	ECO:0000316	IGI	PMID:22500019	UniProtKB:O60896,UniProtKB:P05067:PRO_0000000092	9606	has_regulation_target(UniProtKB:P13861)	20170628	P		PMID:24658113		15				7	8	30
ComplexPortal	CPX-1134	abeta-42-oligomer_human	involved_in	GO:0010628	positive regulation of gene expression	ECO:0000316	IGI	PMID:22500019	UniProtKB:O60896,UniProtKB:P05067:PRO_0000000092	9606	regulates_expression_of(ENSEMBL:ENSG00000170345)	20170628	P		ComplexPortal	CPX-1134	abeta-42-oligomer_human	involved_in	GO:0010942	positive regulation of cell death	ECO:0000316	IGI	PMID:22500019	ComplexPortal:CPX-3187	9606		20170628	P		PMID:24836577						7		7
ComplexPortal	CPX-1134	abeta-42-oligomer_human	involved_in	GO:0010739	positive regulation of protein kinase A signaling	ECO:0000316	IGI	PMID:22500019	ComplexPortal:CPX-3187|UniProtKB:O60896,UniProtKB:P30988	9606	has_regulation_target(UniProtKB:P13861)	20170628	P		ComplexPortal	CPX-1134	abeta-42-oligomer_human	involved_in	GO:0010942	positive regulation of cell death	ECO:0000316	IGI	PMID:22500019	UniProtKB:O60896,UniProtKB:P30988	9606		20170628	P		PMID:24964035		7				5		12
ComplexPortal	CPX-1134	abeta-42-oligomer_human	involved_in	GO:0010739	positive regulation of protein kinase A signaling	ECO:0000316	IGI	PMID:22500019	UniProtKB:O60896,UniProtKB:P05067:PRO_0000000092	9606	has_regulation_target(UniProtKB:P13861)	20170628	P		ComplexPortal	CPX-1134	abeta-42-oligomer_human	involved_in	GO:0033138	positive regulation of peptidyl-serine phosphorylation	ECO:0000316	IGI	PMID:22500019	ComplexPortal:CPX-3187|UniProtKB:O60896,UniProtKB:P30988	9606	has_regulation_target(UniProtKB:P13861)	20170628	P		PMID:25006867		4						4
ComplexPortal	CPX-1134	abeta-42-oligomer_human	involved_in	GO:0010942	positive regulation of cell death	ECO:0000316	IGI	PMID:22500019	ComplexPortal:CPX-3187	9606		20170628	P		ComplexPortal	CPX-1134	abeta-42-oligomer_human	involved_in	GO:0051897	positive regulation of protein kinase B signaling	ECO:0000316	IGI	PMID:22500019	ComplexPortal:CPX-3187|UniProtKB:O60896,UniProtKB:P30988	9606		20170628	P		PMID:25015123		3						3
ComplexPortal	CPX-1134	abeta-42-oligomer_human	involved_in	GO:0010942	positive regulation of cell death	ECO:0000316	IGI	PMID:22500019	UniProtKB:O60896,UniProtKB:P30988	9606		20170628	P		ComplexPortal	CPX-1134	abeta-42-oligomer_human	involved_in	GO:0070374	positive regulation of ERK1 and ERK2 cascade	ECO:0000316	IGI	PMID:22500019	ComplexPortal:CPX-3187|UniProtKB:O60896,UniProtKB:P30988	9606		20170628	P		PMID:25051234		22						22
ComplexPortal	CPX-1134	abeta-42-oligomer_human	involved_in	GO:0033138	positive regulation of peptidyl-serine phosphorylation	ECO:0000316	IGI	PMID:22500019	ComplexPortal:CPX-3187|UniProtKB:O60896,UniProtKB:P30988	9606	has_regulation_target(UniProtKB:P13861)	20170628	P		ComplexPortal	CPX-1134	abeta-42-oligomer_human	involved_in	GO:1905665	positive regulation of calcium ion import across plasma membrane	ECO:0000316	IGI	PMID:22500019	ComplexPortal:CPX-3187|UniProtKB:O60896,UniProtKB:P30988	9606		20170628	P		PMID:2509111							7	7
ComplexPortal	CPX-1134	abeta-42-oligomer_human	involved_in	GO:0051897	positive regulation of protein kinase B signaling	ECO:0000316	IGI	PMID:22500019	ComplexPortal:CPX-3187|UniProtKB:O60896,UniProtKB:P30988	9606		20170628	P		ComplexPortal	CPX-1134	abeta-42-oligomer_human	involved_in	GO:0097647	amylin receptor signaling pathway	ECO:0000316	IGI	PMID:22500019	ComplexPortal:CPX-3187	9606		20170705	P		PMID:25123532		4						4
ComplexPortal	CPX-1134	abeta-42-oligomer_human	involved_in	GO:0070374	positive regulation of ERK1 and ERK2 cascade	ECO:0000316	IGI	PMID:22500019	ComplexPortal:CPX-3187|UniProtKB:O60896,UniProtKB:P30988	9606		20170628	P		ComplexPortal	CPX-1134	abeta-42-oligomer_human	involved_in	GO:0097647	amylin receptor signaling pathway	ECO:0000316	IGI	PMID:22500019	UniProtKB:O60896,UniProtKB:P30988	9606		20170705	P		PMID:25202012		12						12
ComplexPortal	CPX-1134	abeta-42-oligomer_human	involved_in	GO:1905665	positive regulation of calcium ion import across plasma membrane	ECO:0000316	IGI	PMID:22500019	ComplexPortal:CPX-3187|UniProtKB:O60896,UniProtKB:P30988	9606		20170628	P		ComplexPortal	CPX-1134	abeta-42-oligomer_human	involved_in	GO:0010628	positive regulation of gene expression	ECO:0000316	IGI	PMID:22635104	UniProtKB:P05019,UniProtKB:P08069	9606	regulates_o_occurs_in(CL:0000540),regulates_expression_of(ENSEMBL:ENSG00000064300),occurs_in(GO:0005886)	20170906	P		PMID:25207746		4						4
ComplexPortal	CPX-1134	abeta-42-oligomer_human	involved_in	GO:0097647	amylin receptor signaling pathway	ECO:0000316	IGI	PMID:22500019	ComplexPortal:CPX-3187	9606		20170705	P		ComplexPortal	CPX-1134	abeta-42-oligomer_human	involved_in	GO:0050731	positive regulation of peptidyl-tyrosine phosphorylation	ECO:0000314	IDA	PMID:22635104		9606	regulates_o_occurs_in(CL:0000540),has_regulation_target(UniProtKB:P08069),occurs_in(GO:0005886)	20170906	P		PMID:25326800		7				6		13
ComplexPortal	CPX-1134	abeta-42-oligomer_human	involved_in	GO:0097647	amylin receptor signaling pathway	ECO:0000316	IGI	PMID:22500019	UniProtKB:O60896,UniProtKB:P30988	9606		20170705	P		ComplexPortal	CPX-1134	abeta-42-oligomer_human	involved_in	GO:0010628	positive regulation of gene expression	ECO:0000304	TAS	PMID:23164821		9606	regulates_expression_of(ENSEMBL:ENSG00000107984),regulates_o_occurs_in(CL:0000540),negatively_regulates(GO:0060070)	20170627	P		PMID:25390368		20					4	24
ComplexPortal	CPX-1134	abeta-42-oligomer_human	involved_in	GO:0010628	positive regulation of gene expression	ECO:0000316	IGI	PMID:22635104	UniProtKB:P05019,UniProtKB:P08069	9606	regulates_o_occurs_in(CL:0000540),regulates_expression_of(ENSEMBL:ENSG00000064300),occurs_in(GO:0005886)	20170906	P		ComplexPortal	CPX-1134	abeta-42-oligomer_human	involved_in	GO:0010628	positive regulation of gene expression	ECO:0000316	IGI	PMID:23164821	UniProtKB:D3Z9J1	9606	regulates_o_occurs_in(CL:0002609),regulates_expression_of(ENSEMBL:ENSG00000166886)|regulates_o_occurs_in(CL:0002609),regulates_expression_of(ENSEMBL:ENSG00000155090)|regulates_o_occurs_in(CL:0002609),regulates_expression_of(ENSEMBL:ENSG00000110092)|regulates_o_occurs_in(CL:0002609),regulates_expression_of(ENSEMBL:ENSG00000170345)|regulates_o_occurs_in(CL:0002609),regulates_expression_of(ENSEMBL:E…	20170627	P		PMID:25390692		6					7	13
ComplexPortal	CPX-1134	abeta-42-oligomer_human	involved_in	GO:0050731	positive regulation of peptidyl-tyrosine phosphorylation	ECO:0000314	IDA	PMID:22635104		9606	regulates_o_occurs_in(CL:0000540),has_regulation_target(UniProtKB:P08069),occurs_in(GO:0005886)	20170906	P		ComplexPortal	CPX-1134	abeta-42-oligomer_human	involved_in	GO:0010628	positive regulation of gene expression	ECO:0000316	IGI	PMID:23164821	UniProtKB:O94907	9606	regulates_o_occurs_in(CL:0002609),regulates_expression_of(ENSEMBL:ENSG00000166886)|regulates_o_occurs_in(CL:0002609),regulates_expression_of(ENSEMBL:ENSG00000155090)|regulates_o_occurs_in(CL:0002609),regulates_expression_of(ENSEMBL:ENSG00000110092)|regulates_o_occurs_in(CL:0002609),regulates_expression_of(ENSEMBL:ENSG00000170345)|regulates_o_occurs_in(CL:0002609),regulates_expression_of(ENSEMBL:E…	20170627	P		PMID:25424568		15				6	10	31
ComplexPortal	CPX-1134	abeta-42-oligomer_human	involved_in	GO:0010628	positive regulation of gene expression	ECO:0000304	TAS	PMID:23164821		9606	regulates_expression_of(ENSEMBL:ENSG00000107984),regulates_o_occurs_in(CL:0000540),negatively_regulates(GO:0060070)	20170627	P		ComplexPortal	CPX-1134	abeta-42-oligomer_human	involved_in	GO:0010628	positive regulation of gene expression	ECO:0000316	IGI	PMID:23164821	UniProtKB:P10909	9606	regulates_expression_of(ENSEMBL:ENSG00000107984),occurs_in(UBERON:0000956)	20170627	P		PMID:25428619		2					2	4
ComplexPortal	CPX-1134	abeta-42-oligomer_human	involved_in	GO:0010628	positive regulation of gene expression	ECO:0000316	IGI	PMID:23164821	UniProtKB:D3Z9J1	9606	regulates_o_occurs_in(CL:0002609),regulates_expression_of(ENSEMBL:ENSG00000166886)|regulates_o_occurs_in(CL:0002609),regulates_expression_of(ENSEMBL:ENSG00000155090)|regulates_o_occurs_in(CL:0002609),regulates_expression_of(ENSEMBL:ENSG00000110092)|regulates_o_occurs_in(CL:0002609),regulates_expression_of(ENSEMBL:ENSG00000170345)|regulates_o_occurs_in(CL:0002609),regulates_expression_of(ENSEMBL:E…	20170627	P		ComplexPortal	CPX-1134	abeta-42-oligomer_human	involved_in	GO:0043507	positive regulation of JUN kinase activity	ECO:0000314	IDA	PMID:23164821		9606	regulates_o_occurs_in(CL:0002609)	20170627	P		PMID:25556849		5					3	8
ComplexPortal	CPX-1134	abeta-42-oligomer_human	involved_in	GO:0010628	positive regulation of gene expression	ECO:0000316	IGI	PMID:23164821	UniProtKB:O94907	9606	regulates_o_occurs_in(CL:0002609),regulates_expression_of(ENSEMBL:ENSG00000166886)|regulates_o_occurs_in(CL:0002609),regulates_expression_of(ENSEMBL:ENSG00000155090)|regulates_o_occurs_in(CL:0002609),regulates_expression_of(ENSEMBL:ENSG00000110092)|regulates_o_occurs_in(CL:0002609),regulates_expression_of(ENSEMBL:ENSG00000170345)|regulates_o_occurs_in(CL:0002609),regulates_expression_of(ENSEMBL:E…	20170627	P		ComplexPortal	CPX-1134	abeta-42-oligomer_human	involved_in	GO:1901216	positive regulation of neuron death	ECO:0000316	IGI	PMID:23164821	UniProtKB:A0A0H2UHR3	9606	regulates_o_occurs_in(CL:0002609)	20170627	P		PMID:2561973				7			1	8
ComplexPortal	CPX-1134	abeta-42-oligomer_human	involved_in	GO:0010628	positive regulation of gene expression	ECO:0000316	IGI	PMID:23164821	UniProtKB:P10909	9606	regulates_expression_of(ENSEMBL:ENSG00000107984),occurs_in(UBERON:0000956)	20170627	P		ComplexPortal	CPX-1134	abeta-42-oligomer_human	involved_in	GO:1901216	positive regulation of neuron death	ECO:0000316	IGI	PMID:23164821	UniProtKB:D3Z9J1	9606	regulates_o_occurs_in(CL:0002609)	20170627	P		PMID:25707991		9						9
ComplexPortal	CPX-1134	abeta-42-oligomer_human	involved_in	GO:0043507	positive regulation of JUN kinase activity	ECO:0000314	IDA	PMID:23164821		9606	regulates_o_occurs_in(CL:0002609)	20170627	P		ComplexPortal	CPX-1134	abeta-42-oligomer_human	involved_in	GO:1901216	positive regulation of neuron death	ECO:0000316	IGI	PMID:23164821	UniProtKB:P10909	9606	occurs_in(GO:0005622),occurs_in(UBERON:0000956)	20170627	P		PMID:25788287						12	16	28
ComplexPortal	CPX-1134	abeta-42-oligomer_human	involved_in	GO:1901216	positive regulation of neuron death	ECO:0000316	IGI	PMID:23164821	UniProtKB:A0A0H2UHR3	9606	regulates_o_occurs_in(CL:0002609)	20170627	P		ComplexPortal	CPX-1134	abeta-42-oligomer_human	involved_in	GO:1901216	positive regulation of neuron death	ECO:0000316	IGI	PMID:23164821	UniProtKB:P12841	9606	regulates_o_occurs_in(CL:0002609)	20170627	P		PMID:25788676						12		12
ComplexPortal	CPX-1134	abeta-42-oligomer_human	involved_in	GO:1901216	positive regulation of neuron death	ECO:0000316	IGI	PMID:23164821	UniProtKB:D3Z9J1	9606	regulates_o_occurs_in(CL:0002609)	20170627	P		ComplexPortal	CPX-1134	abeta-42-oligomer_human	involved_in	GO:1902949	positive regulation of tau-protein kinase activity	ECO:0000316	IGI	PMID:23164821	UniProtKB:A0A0H2UHR3	9606	regulates_o_occurs_in(CL:0002609)	20170627	P		PMID:25897075		15						15
ComplexPortal	CPX-1134	abeta-42-oligomer_human	involved_in	GO:1901216	positive regulation of neuron death	ECO:0000316	IGI	PMID:23164821	UniProtKB:P10909	9606	occurs_in(GO:0005622),occurs_in(UBERON:0000956)	20170627	P		ComplexPortal	CPX-1134	abeta-42-oligomer_human	involved_in	GO:1902949	positive regulation of tau-protein kinase activity	ECO:0000316	IGI	PMID:23164821	UniProtKB:D4A4F4	9606	regulates_o_occurs_in(CL:0002609)	20170627	P		PMID:25898166		20					2	22
ComplexPortal	CPX-1134	abeta-42-oligomer_human	involved_in	GO:1901216	positive regulation of neuron death	ECO:0000316	IGI	PMID:23164821	UniProtKB:P12841	9606	regulates_o_occurs_in(CL:0002609)	20170627	P		ComplexPortal	CPX-1134	abeta-42-oligomer_human	involved_in	GO:1904591	positive regulation of protein import	ECO:0000314	IDA	PMID:23164821		9606	positively_regulates(GO:0098776),has_regulation_target(UniProtKB:P05371),occurs_in(CL:0002609)	20170627	P		PMID:26005850		41				5		46
ComplexPortal	CPX-1134	abeta-42-oligomer_human	involved_in	GO:1902949	positive regulation of tau-protein kinase activity	ECO:0000316	IGI	PMID:23164821	UniProtKB:A0A0H2UHR3	9606	regulates_o_occurs_in(CL:0002609)	20170627	P		ComplexPortal	CPX-1134	abeta-42-oligomer_human	colocalizes_with	GO:0005764	lysosome	ECO:0000314	IDA	PMID:23386614		9606		20170626	C		PMID:26078884		9				2	1	12
ComplexPortal	CPX-1134	abeta-42-oligomer_human	involved_in	GO:1902949	positive regulation of tau-protein kinase activity	ECO:0000316	IGI	PMID:23164821	UniProtKB:D4A4F4	9606	regulates_o_occurs_in(CL:0002609)	20170627	P		ComplexPortal	CPX-1134	abeta-42-oligomer_human	colocalizes_with	GO:0005769	early endosome	ECO:0000314	IDA	PMID:23386614		9606		20170626	C		PMID:26224839		24					7	31
ComplexPortal	CPX-1134	abeta-42-oligomer_human	involved_in	GO:1904591	positive regulation of protein import	ECO:0000314	IDA	PMID:23164821		9606	positively_regulates(GO:0098776),has_regulation_target(UniProtKB:P05371),occurs_in(CL:0002609)	20170627	P		ComplexPortal	CPX-1134	abeta-42-oligomer_human	colocalizes_with	GO:0005886	plasma membrane	ECO:0000314	IDA	PMID:23386614		9606		20170626	C		PMID:26323690		31				3	3	37
ComplexPortal	CPX-1134	abeta-42-oligomer_human	colocalizes_with	GO:0005764	lysosome	ECO:0000314	IDA	PMID:23386614		9606		20170626	C		ComplexPortal	CPX-1134	abeta-42-oligomer_human	enables	GO:0005515	protein binding	ECO:0000353	IPI	PMID:23386614	UniProtKB:P04156	9606		20170626	F		PMID:26440732		2				2		4
ComplexPortal	CPX-1134	abeta-42-oligomer_human	colocalizes_with	GO:0005769	early endosome	ECO:0000314	IDA	PMID:23386614		9606		20170626	C		ComplexPortal	CPX-1134	abeta-42-oligomer_human	involved_in	GO:0002092	positive regulation of receptor internalization	ECO:0000314	IDA	PMID:23386614		9606	has_regulation_target(UniProtKB:P04156)	20170626	P		PMID:26444684		2				3		5
ComplexPortal	CPX-1134	abeta-42-oligomer_human	colocalizes_with	GO:0005886	plasma membrane	ECO:0000314	IDA	PMID:23386614		9606		20170626	C		ComplexPortal	CPX-1134	abeta-42-oligomer_human	involved_in	GO:0002092	positive regulation of receptor internalization	ECO:0000315	IMP	PMID:23386614		9606	has_regulation_target(UniProtKB:Q07954)	20170626	P		PMID:26609151		8				30		38
ComplexPortal	CPX-1134	abeta-42-oligomer_human	enables	GO:0005515	protein binding	ECO:0000353	IPI	PMID:23386614	UniProtKB:P04156	9606		20170626	F		ComplexPortal	CPX-1134	abeta-42-oligomer_human	involved_in	GO:0010942	positive regulation of cell death	ECO:0000316	IGI	PMID:23386614	UniProtKB:P04925	9606		20170626	P		PMID:26683154		36						36
ComplexPortal	CPX-1134	abeta-42-oligomer_human	involved_in	GO:0002092	positive regulation of receptor internalization	ECO:0000314	IDA	PMID:23386614		9606	has_regulation_target(UniProtKB:P04156)	20170626	P		ComplexPortal	CPX-1134	abeta-42-oligomer_human	involved_in	GO:0010942	positive regulation of cell death	ECO:0000316	IGI	PMID:23386614	UniProtKB:Q07954	9606		20170626	P		PMID:26704708		3						3
ComplexPortal	CPX-1134	abeta-42-oligomer_human	involved_in	GO:0002092	positive regulation of receptor internalization	ECO:0000315	IMP	PMID:23386614		9606	has_regulation_target(UniProtKB:Q07954)	20170626	P		ComplexPortal	CPX-1134	abeta-42-oligomer_human	involved_in	GO:0010954	positive regulation of protein processing	ECO:0000316	IGI	PMID:23386614	UniProtKB:P04925	9606	has_regulation_target(UniProtKB:P05067),positively_regulates(GO:0034205)	20170626	P		PMID:26719327		5						5
ComplexPortal	CPX-1134	abeta-42-oligomer_human	involved_in	GO:0010942	positive regulation of cell death	ECO:0000316	IGI	PMID:23386614	UniProtKB:P04925	9606		20170626	P		ComplexPortal	CPX-1134	abeta-42-oligomer_human	involved_in	GO:0032147	activation of protein kinase activity	ECO:0000316	IGI	PMID:23386614	UniProtKB:P04925	9606	has_regulation_target(UniProtKB:P06241),has_agent(GO:0045121)	20170626	P		PMID:26996940		6						6
ComplexPortal	CPX-1134	abeta-42-oligomer_human	involved_in	GO:0010942	positive regulation of cell death	ECO:0000316	IGI	PMID:23386614	UniProtKB:Q07954	9606		20170626	P		ComplexPortal	CPX-1134	abeta-42-oligomer_human	involved_in	GO:0043085	positive regulation of catalytic activity	ECO:0000316	IGI	PMID:23386614	UniProtKB:P04925	9606	has_regulation_target(UniProtKB:P56817),positively_regulates(GO:0034205)	20170626	P		PMID:27160703		11						11
ComplexPortal	CPX-1134	abeta-42-oligomer_human	involved_in	GO:0010954	positive regulation of protein processing	ECO:0000316	IGI	PMID:23386614	UniProtKB:P04925	9606	has_regulation_target(UniProtKB:P05067),positively_regulates(GO:0034205)	20170626	P		ComplexPortal	CPX-1134	abeta-42-oligomer_human	involved_in	GO:0044092	negative regulation of molecular function	ECO:0000314	IDA	PMID:23386614		9606	has_regulation_target(UniProtKB:P04156),positively_regulates(GO:0034205)	20170626	P		PMID:27179792		5				2		7
ComplexPortal	CPX-1134	abeta-42-oligomer_human	involved_in	GO:0032147	activation of protein kinase activity	ECO:0000316	IGI	PMID:23386614	UniProtKB:P04925	9606	has_regulation_target(UniProtKB:P06241),has_agent(GO:0045121)	20170626	P		ComplexPortal	CPX-1134	abeta-42-oligomer_human	involved_in	GO:0097202	activation of cysteine-type endopeptidase activity	ECO:0000304	TAS	PMID:23386614		9606		20170626	P		PMID:27256286		2						2
ComplexPortal	CPX-1134	abeta-42-oligomer_human	involved_in	GO:0043085	positive regulation of catalytic activity	ECO:0000316	IGI	PMID:23386614	UniProtKB:P04925	9606	has_regulation_target(UniProtKB:P56817),positively_regulates(GO:0034205)	20170626	P		ComplexPortal	CPX-1134	abeta-42-oligomer_human	involved_in	GO:1902004	positive regulation of amyloid-beta formation	ECO:0000316	IGI	PMID:23386614	UniProtKB:P04925	9606		20170626	P		PMID:27430620						25		25
ComplexPortal	CPX-1134	abeta-42-oligomer_human	involved_in	GO:0044092	negative regulation of molecular function	ECO:0000314	IDA	PMID:23386614		9606	has_regulation_target(UniProtKB:P04156),positively_regulates(GO:0034205)	20170626	P		ComplexPortal	CPX-1134	abeta-42-oligomer_human	involved_in	GO:1902966	positive regulation of protein localization to early endosome	ECO:0000314	IDA	PMID:23386614		9606	has_regulation_target(UniProtKB:Q07954)	20170626	P		PMID:27525436		19				5	13	37
ComplexPortal	CPX-1134	abeta-42-oligomer_human	involved_in	GO:0097202	activation of cysteine-type endopeptidase activity	ECO:0000304	TAS	PMID:23386614		9606		20170626	P		ComplexPortal	CPX-1134	abeta-42-oligomer_human	involved_in	GO:1903827	regulation of cellular protein localization	ECO:0000314	IDA	PMID:23386614		9606	has_regulation_target(UniProtKB:P04156),has_regulation_target(UniProtKB:Q07954)	20170626	P		PMID:27607416		4						4
ComplexPortal	CPX-1134	abeta-42-oligomer_human	involved_in	GO:1902004	positive regulation of amyloid-beta formation	ECO:0000316	IGI	PMID:23386614	UniProtKB:P04925	9606		20170626	P		ComplexPortal	CPX-1134	abeta-42-oligomer_human	involved_in	GO:1901216	positive regulation of neuron death	ECO:0000316	IGI	PMID:23921129	UniProtKB:P05067:PRO_0000000092	9606	regulates_o_occurs_in(CL:0002609),part_of(GO:1904646)	20170621	P		PMID:27626661		4					5	9
ComplexPortal	CPX-1134	abeta-42-oligomer_human	involved_in	GO:1902966	positive regulation of protein localization to early endosome	ECO:0000314	IDA	PMID:23386614		9606	has_regulation_target(UniProtKB:Q07954)	20170626	P		ComplexPortal	CPX-1134	abeta-42-oligomer_human	involved_in	GO:1902950	regulation of dendritic spine maintenance	ECO:0000316	IGI	PMID:23921129	UniProtKB:P05067:PRO_0000000092	9606	occurs_in(CL:0002608),part_of(GO:1904646),regulates_o_occurs_in(CL:0002608)	20170621	P		PMID:27708431		1						1
ComplexPortal	CPX-1134	abeta-42-oligomer_human	involved_in	GO:1903827	regulation of cellular protein localization	ECO:0000314	IDA	PMID:23386614		9606	has_regulation_target(UniProtKB:P04156),has_regulation_target(UniProtKB:Q07954)	20170626	P		ComplexPortal	CPX-1134	abeta-42-oligomer_human	involved_in	GO:1904646	cellular response to amyloid-beta	ECO:0000316	IGI	PMID:23921129	UniProtKB:P05067:PRO_0000000092	9606	occurs_in(CL:0002609)|occurs_in(CL:0002608)	20170621	P		PMID:27853422		17						17
ComplexPortal	CPX-1134	abeta-42-oligomer_human	involved_in	GO:1901216	positive regulation of neuron death	ECO:0000316	IGI	PMID:23921129	UniProtKB:P05067:PRO_0000000092	9606	regulates_o_occurs_in(CL:0002609),part_of(GO:1904646)	20170621	P		ComplexPortal	CPX-1134	abeta-42-oligomer_human	enables	GO:0005102	signaling receptor binding	ECO:0000353	IPI	PMID:23921129	UniProtKB:P31994	9606	occurs_in(UBERON:0001954)	20170622	F		PMID:27876530							1	1
ComplexPortal	CPX-1134	abeta-42-oligomer_human	involved_in	GO:1902950	regulation of dendritic spine maintenance	ECO:0000316	IGI	PMID:23921129	UniProtKB:P05067:PRO_0000000092	9606	occurs_in(CL:0002608),part_of(GO:1904646),regulates_o_occurs_in(CL:0002608)	20170621	P		ComplexPortal	CPX-1134	abeta-42-oligomer_human	involved_in	GO:0045944	positive regulation of transcription by RNA polymerase II	ECO:0000316	IGI	PMID:23921129	UniProtKB:P05067	9606	part_of(GO:1904646),regulates_transcription_of(ENSEMBL:ENSG00000072694)	20170622	P		PMID:28031292		18						18
ComplexPortal	CPX-1134	abeta-42-oligomer_human	involved_in	GO:1904646	cellular response to amyloid-beta	ECO:0000316	IGI	PMID:23921129	UniProtKB:P05067:PRO_0000000092	9606	occurs_in(CL:0002609)|occurs_in(CL:0002608)	20170621	P		ComplexPortal	CPX-1134	abeta-42-oligomer_human	involved_in	GO:0046330	positive regulation of JNK cascade	ECO:0000316	IGI	PMID:23921129	UniProtKB:P05067	9606	regulates_o_occurs_in(CL:0002609),part_of(GO:1904646),part_of(GO:1901216)	20170622	P		PMID:28242692		30						30
ComplexPortal	CPX-1134	abeta-42-oligomer_human	enables	GO:0005102	signaling receptor binding	ECO:0000353	IPI	PMID:23921129	UniProtKB:P31994	9606	occurs_in(UBERON:0001954)	20170622	F		ComplexPortal	CPX-1134	abeta-42-oligomer_human	involved_in	GO:0048169	regulation of long-term neuronal synaptic plasticity	ECO:0000316	IGI	PMID:23921129	UniProtKB:P05067	9606	regulates_o_occurs_in(UBERON:0001954),occurs_in(UBERON:0001954)	20170622	P		PMID:28377597		8					1	9
ComplexPortal	CPX-1134	abeta-42-oligomer_human	involved_in	GO:0045944	positive regulation of transcription by RNA polymerase II	ECO:0000316	IGI	PMID:23921129	UniProtKB:P05067	9606	part_of(GO:1904646),regulates_transcription_of(ENSEMBL:ENSG00000072694)	20170622	P		ComplexPortal	CPX-1134	abeta-42-oligomer_human	involved_in	GO:0051091	positive regulation of DNA-binding transcription factor activity	ECO:0000316	IGI	PMID:23921129	UniProtKB:P05067	9606	regulates_o_occurs_in(CL:0002609),part_of(GO:1904646),regulates_activity_of(UniProtKB:P05412)	20170622	P		PMID:28386764		116						116
ComplexPortal	CPX-1134	abeta-42-oligomer_human	involved_in	GO:0046330	positive regulation of JNK cascade	ECO:0000316	IGI	PMID:23921129	UniProtKB:P05067	9606	regulates_o_occurs_in(CL:0002609),part_of(GO:1904646),part_of(GO:1901216)	20170622	P		ComplexPortal	CPX-1134	abeta-42-oligomer_human	involved_in	GO:1901216	positive regulation of neuron death	ECO:0000314	IDA	PMID:23921129		9606	occurs_in(CL:0002608),part_of(GO:1904646),regulates_o_occurs_in(CL:0002608)	20170622	P		PMID:28426968		3				10	33	46
ComplexPortal	CPX-1134	abeta-42-oligomer_human	involved_in	GO:0048169	regulation of long-term neuronal synaptic plasticity	ECO:0000316	IGI	PMID:23921129	UniProtKB:P05067	9606	regulates_o_occurs_in(UBERON:0001954),occurs_in(UBERON:0001954)	20170622	P		ComplexPortal	CPX-1134	abeta-42-oligomer_human	involved_in	GO:0035584	calcium-mediated signaling using intracellular calcium source	ECO:0000314	IDA	PMID:24012003		9606		20170627	P		PMID:28455959		1				6		7
ComplexPortal	CPX-1134	abeta-42-oligomer_human	involved_in	GO:0051091	positive regulation of DNA-binding transcription factor activity	ECO:0000316	IGI	PMID:23921129	UniProtKB:P05067	9606	regulates_o_occurs_in(CL:0002609),part_of(GO:1904646),regulates_activity_of(UniProtKB:P05412)	20170622	P		ComplexPortal	CPX-1134	abeta-42-oligomer_human	involved_in	GO:1900450	negative regulation of glutamate receptor signaling pathway	ECO:0000316	IGI	PMID:24012003	UniProtKB:P04156,UniProtKB:P41594	9606	occurs_in(CL:0000540)	20170627	P		PMID:28594399						3		3
ComplexPortal	CPX-1134	abeta-42-oligomer_human	involved_in	GO:1901216	positive regulation of neuron death	ECO:0000314	IDA	PMID:23921129		9606	occurs_in(CL:0002608),part_of(GO:1904646),regulates_o_occurs_in(CL:0002608)	20170622	P		ComplexPortal	CPX-1134	abeta-42-oligomer_human	involved_in	GO:0001932	regulation of protein phosphorylation	ECO:0000316	IGI	PMID:24012003	UniProtKB:P41594	9606	occurs_in(GO:0030425),has_regulation_target(UniProtKB:P13639)	20170628	P		PMID:28679962		6				9	9	24
ComplexPortal	CPX-1134	abeta-42-oligomer_human	involved_in	GO:0035584	calcium-mediated signaling using intracellular calcium source	ECO:0000314	IDA	PMID:24012003		9606		20170627	P		ComplexPortal	CPX-1134	abeta-42-oligomer_human	involved_in	GO:0006448	regulation of translational elongation	ECO:0000316	IGI	PMID:24012003	UniProtKB:P06241,UniProtKB:P13639,UniProtKB:P41594	9606	occurs_in(GO:0030425),has_regulation_target(UniProtKB:Q7LC44)	20170628	P		PMID:28755476		5						5
ComplexPortal	CPX-1134	abeta-42-oligomer_human	involved_in	GO:1900450	negative regulation of glutamate receptor signaling pathway	ECO:0000316	IGI	PMID:24012003	UniProtKB:P04156,UniProtKB:P41594	9606	occurs_in(CL:0000540)	20170627	P		ComplexPortal	CPX-1134	abeta-42-oligomer_human	involved_in	GO:0061098	positive regulation of protein tyrosine kinase activity	ECO:0000316	IGI	PMID:24012003	UniProtKB:P04156,UniProtKB:P41594	9606	has_regulation_target(UniProtKB:P06241),occurs_in(CL:0002609)	20170628	P		PMID:29111364		6				1		7
ComplexPortal	CPX-1134	abeta-42-oligomer_human	involved_in	GO:0001932	regulation of protein phosphorylation	ECO:0000316	IGI	PMID:24012003	UniProtKB:P41594	9606	occurs_in(GO:0030425),has_regulation_target(UniProtKB:P13639)	20170628	P		ComplexPortal	CPX-1134	abeta-42-oligomer_human	involved_in	GO:1902938	regulation of intracellular calcium activated chloride channel activity	ECO:0000316	IGI	PMID:24012003	UniProtKB:P04156,UniProtKB:P41594	9606		20170628	P		PMID:29199275		9				9		18
ComplexPortal	CPX-1134	abeta-42-oligomer_human	involved_in	GO:0006448	regulation of translational elongation	ECO:0000316	IGI	PMID:24012003	UniProtKB:P06241,UniProtKB:P13639,UniProtKB:P41594	9606	occurs_in(GO:0030425),has_regulation_target(UniProtKB:Q7LC44)	20170628	P		ComplexPortal	CPX-1134	abeta-42-oligomer_human	involved_in	GO:1902951	negative regulation of dendritic spine maintenance	ECO:0000316	IGI	PMID:24012003	UniProtKB:P04156	9606	regulates_o_occurs_in(CL:0002608)	20170628	P		PMID:29206867		10						10
ComplexPortal	CPX-1134	abeta-42-oligomer_human	involved_in	GO:0061098	positive regulation of protein tyrosine kinase activity	ECO:0000316	IGI	PMID:24012003	UniProtKB:P04156,UniProtKB:P41594	9606	has_regulation_target(UniProtKB:P06241),occurs_in(CL:0002609)	20170628	P		ComplexPortal	CPX-1134	abeta-42-oligomer_human	enables	GO:0005102	signaling receptor binding	ECO:0000353	IPI	PMID:24052308	UniProtKB:P97484	9606		20170725	F		PMID:3517689							7	7
ComplexPortal	CPX-1134	abeta-42-oligomer_human	involved_in	GO:1902938	regulation of intracellular calcium activated chloride channel activity	ECO:0000316	IGI	PMID:24012003	UniProtKB:P04156,UniProtKB:P41594	9606		20170628	P		ComplexPortal	CPX-1134	abeta-42-oligomer_human	enables	GO:0005102	signaling receptor binding	ECO:0000353	IPI	PMID:24052308	UniProtKB:Q8N423	9606		20170725	F		PMID:3835499							6	6
ComplexPortal	CPX-1134	abeta-42-oligomer_human	involved_in	GO:1902951	negative regulation of dendritic spine maintenance	ECO:0000316	IGI	PMID:24012003	UniProtKB:P04156	9606	regulates_o_occurs_in(CL:0002608)	20170628	P		ComplexPortal	CPX-1134	abeta-42-oligomer_human	involved_in	GO:0035307	positive regulation of protein dephosphorylation	ECO:0000316	IGI	PMID:24052308	UniProtKB:P97484	9606	regulates_o_occurs_in(CL:0002609),has_regulation_target(UniProtKB:P18760)	20170725	P		PMID:7592957		3						3
ComplexPortal	CPX-1134	abeta-42-oligomer_human	enables	GO:0005102	signaling receptor binding	ECO:0000353	IPI	PMID:24052308	UniProtKB:P97484	9606		20170725	F		ComplexPortal	CPX-1134	abeta-42-oligomer_human	involved_in	GO:0051248	negative regulation of protein metabolic process	ECO:0000316	IGI	PMID:24052308	UniProtKB:P97484	9606	regulates_o_occurs_in(CL:0002609),has_regulation_target(UniProtKB:Q62108),causally_upstream_of(GO:0099558)	20170725	P		PMID:7683668		3						3
ComplexPortal	CPX-1134	abeta-42-oligomer_human	enables	GO:0005102	signaling receptor binding	ECO:0000353	IPI	PMID:24052308	UniProtKB:Q8N423	9606		20170725	F		ComplexPortal	CPX-1134	abeta-42-oligomer_human	involved_in	GO:1900272	negative regulation of long-term synaptic potentiation	ECO:0000316	IGI	PMID:24052308	UniProtKB:P97484	9606	regulates_o_occurs_in(UBERON:0002421)	20170725	P		PMID:8089103		3						3
ComplexPortal	CPX-1134	abeta-42-oligomer_human	involved_in	GO:0035307	positive regulation of protein dephosphorylation	ECO:0000316	IGI	PMID:24052308	UniProtKB:P97484	9606	regulates_o_occurs_in(CL:0002609),has_regulation_target(UniProtKB:P18760)	20170725	P		ComplexPortal	CPX-1134	abeta-42-oligomer_human	colocalizes_with	GO:0030425	dendrite	ECO:0000314	IDA	PMID:24658113		9606	part_of(CL:0002608)	20170627	C		PMID:8300609		2						2
ComplexPortal	CPX-1134	abeta-42-oligomer_human	involved_in	GO:0051248	negative regulation of protein metabolic process	ECO:0000316	IGI	PMID:24052308	UniProtKB:P97484	9606	regulates_o_occurs_in(CL:0002609),has_regulation_target(UniProtKB:Q62108),causally_upstream_of(GO:0099558)	20170725	P		ComplexPortal	CPX-1134	abeta-42-oligomer_human	enables	GO:0030296	protein tyrosine kinase activator activity	ECO:0000314	IDA	PMID:24658113		9606	has_input(UniProtKB:P00519),occurs_in(UBERON:0002421),regulates_o_occurs_in(GO:0043025)|has_input(UniProtKB:P00519),occurs_in(UBERON:0002421),regulates_o_occurs_in(GO:0005634),regulates_o_occurs_in(CL:0000540)|has_input(UniProtKB:P00519),occurs_in(UBERON:0002421),regulates_o_occurs_in(GO:0030425)	20170627	F		PMID:8725894		5						5
ComplexPortal	CPX-1134	abeta-42-oligomer_human	involved_in	GO:1900272	negative regulation of long-term synaptic potentiation	ECO:0000316	IGI	PMID:24052308	UniProtKB:P97484	9606	regulates_o_occurs_in(UBERON:0002421)	20170725	P		ComplexPortal	CPX-1134	abeta-42-oligomer_human	enables	GO:0030296	protein tyrosine kinase activator activity	ECO:0000314	IDA	PMID:24658113		9606	has_input(UniProtKB:P54764),occurs_in(UBERON:0002421),part_of(GO:1901189)	20170627	F		PMID:9003062		1						1
ComplexPortal	CPX-1134	abeta-42-oligomer_human	colocalizes_with	GO:0030425	dendrite	ECO:0000314	IDA	PMID:24658113		9606	part_of(CL:0002608)	20170627	C		ComplexPortal	CPX-1134	abeta-42-oligomer_human	involved_in	GO:0032092	positive regulation of protein binding	ECO:0000314	IDA	PMID:24658113		9606	occurs_in(CL:0002608),has_regulation_target(UniProtKB:P54764),has_regulation_target(UniProtKB:P00519)	20170627	P		PMID:9065484		5	3		1		1	10
ComplexPortal	CPX-1134	abeta-42-oligomer_human	enables	GO:0030296	protein tyrosine kinase activator activity	ECO:0000314	IDA	PMID:24658113		9606	has_input(UniProtKB:P00519),occurs_in(UBERON:0002421),regulates_o_occurs_in(GO:0043025)|has_input(UniProtKB:P00519),occurs_in(UBERON:0002421),regulates_o_occurs_in(GO:0005634),regulates_o_occurs_in(CL:0000540)|has_input(UniProtKB:P00519),occurs_in(UBERON:0002421),regulates_o_occurs_in(GO:0030425)	20170627	F		ComplexPortal	CPX-1134	abeta-42-oligomer_human	involved_in	GO:0032880	regulation of protein localization	ECO:0000314	IDA	PMID:24658113		9606	regulates_o_occurs_in(CL:0002608),has_regulation_target(UniProtKB:P54764),has_target_start_location(GO:0043197),has_target_end_location(GO:0043198),occurs_in(UBERON:0002421)	20170627	P		PMID:9211985		18			9		10	37
ComplexPortal	CPX-1134	abeta-42-oligomer_human	enables	GO:0030296	protein tyrosine kinase activator activity	ECO:0000314	IDA	PMID:24658113		9606	has_input(UniProtKB:P54764),occurs_in(UBERON:0002421),part_of(GO:1901189)	20170627	F		ComplexPortal	CPX-1134	abeta-42-oligomer_human	involved_in	GO:0050731	positive regulation of peptidyl-tyrosine phosphorylation	ECO:0000314	IDA	PMID:24658113		9606	has_regulation_target(UniProtKB:P00519),occurs_in(UBERON:0002421),regulates_o_occurs_in(GO:0043025)|has_regulation_target(UniProtKB:P00519),occurs_in(UBERON:0002421),regulates_o_occurs_in(GO:0005634),regulates_o_occurs_in(CL:0000540)|has_regulation_target(UniProtKB:P00519),occurs_in(UBERON:0002421),regulates_o_occurs_in(GO:0030425)	20170627	P		PMID:9228033		15	4					19
ComplexPortal	CPX-1134	abeta-42-oligomer_human	involved_in	GO:0032092	positive regulation of protein binding	ECO:0000314	IDA	PMID:24658113		9606	occurs_in(CL:0002608),has_regulation_target(UniProtKB:P54764),has_regulation_target(UniProtKB:P00519)	20170627	P		ComplexPortal	CPX-1134	abeta-42-oligomer_human	involved_in	GO:0061098	positive regulation of protein tyrosine kinase activity	ECO:0000314	IDA	PMID:24658113		9606	has_regulation_target(UniProtKB:P00519),occurs_in(UBERON:0002421),regulates_o_occurs_in(GO:0043025)|has_regulation_target(UniProtKB:P00519),occurs_in(UBERON:0002421),regulates_o_occurs_in(GO:0005634),regulates_o_occurs_in(CL:0000540)|has_regulation_target(UniProtKB:P00519),occurs_in(UBERON:0002421),regulates_o_occurs_in(GO:0030425)	20170627	P		PMID:9543386		9				4	4	17
ComplexPortal	CPX-1134	abeta-42-oligomer_human	involved_in	GO:0032880	regulation of protein localization	ECO:0000314	IDA	PMID:24658113		9606	regulates_o_occurs_in(CL:0002608),has_regulation_target(UniProtKB:P54764),has_target_start_location(GO:0043197),has_target_end_location(GO:0043198),occurs_in(UBERON:0002421)	20170627	P		ComplexPortal	CPX-1134	abeta-42-oligomer_human	involved_in	GO:0061098	positive regulation of protein tyrosine kinase activity	ECO:0000314	IDA	PMID:24658113		9606	has_regulation_target(UniProtKB:P54764),occurs_in(UBERON:0002421),regulates_o_occurs_in(CL:0002608)	20170627	P		PMID:9627185							5	5
ComplexPortal	CPX-1134	abeta-42-oligomer_human	involved_in	GO:0050731	positive regulation of peptidyl-tyrosine phosphorylation	ECO:0000314	IDA	PMID:24658113		9606	has_regulation_target(UniProtKB:P00519),occurs_in(UBERON:0002421),regulates_o_occurs_in(GO:0043025)|has_regulation_target(UniProtKB:P00519),occurs_in(UBERON:0002421),regulates_o_occurs_in(GO:0005634),regulates_o_occurs_in(CL:0000540)|has_regulation_target(UniProtKB:P00519),occurs_in(UBERON:0002421),regulates_o_occurs_in(GO:0030425)	20170627	P		ComplexPortal	CPX-1134	abeta-42-oligomer_human	involved_in	GO:0061098	positive regulation of protein tyrosine kinase activity	ECO:0000316	IGI	PMID:24658113	UniProtKB:Q03137	9606	regulates_o_occurs_in(CL:0002608),has_regulation_target(UniProtKB:P00520)	20170627	P		PMID:9821970		3						3
ComplexPortal	CPX-1134	abeta-42-oligomer_human	involved_in	GO:0061098	positive regulation of protein tyrosine kinase activity	ECO:0000314	IDA	PMID:24658113		9606	has_regulation_target(UniProtKB:P00519),occurs_in(UBERON:0002421),regulates_o_occurs_in(GO:0043025)|has_regulation_target(UniProtKB:P00519),occurs_in(UBERON:0002421),regulates_o_occurs_in(GO:0005634),regulates_o_occurs_in(CL:0000540)|has_regulation_target(UniProtKB:P00519),occurs_in(UBERON:0002421),regulates_o_occurs_in(GO:0030425)	20170627	P		ComplexPortal	CPX-1134	abeta-42-oligomer_human	involved_in	GO:1900272	negative regulation of long-term synaptic potentiation	ECO:0000316	IGI	PMID:24658113	UniProtKB:P00520,UniProtKB:Q03137	9606	regulates_o_occurs_in(UBERON:0003881)	20170627	P		Total number of annotations for each taxon	1	2106	7	15	10	649	433	3221
ComplexPortal	CPX-1134	abeta-42-oligomer_human	involved_in	GO:0061098	positive regulation of protein tyrosine kinase activity	ECO:0000314	IDA	PMID:24658113		9606	has_regulation_target(UniProtKB:P54764),occurs_in(UBERON:0002421),regulates_o_occurs_in(CL:0002608)	20170627	P		ComplexPortal	CPX-1134	abeta-42-oligomer_human	involved_in	GO:1901189	positive regulation of ephrin receptor signaling pathway	ECO:0000316	IGI	PMID:24658113	UniProtKB:Q03137	9606	regulates_o_occurs_in(CL:0002608),has_regulation_target(UniProtKB:P54764),negatively_regulates(GO:0060291)	20170627	P		Total number of PMIDs annotated per taxon	1	191	2	2	2	102	79	226
ComplexPortal	CPX-1134	abeta-42-oligomer_human	involved_in	GO:0061098	positive regulation of protein tyrosine kinase activity	ECO:0000316	IGI	PMID:24658113	UniProtKB:Q03137	9606	regulates_o_occurs_in(CL:0002608),has_regulation_target(UniProtKB:P00520)	20170627	P		ComplexPortal	CPX-1134	abeta-42-oligomer_human	involved_in	GO:1905244	regulation of modification of synaptic structure	ECO:0000316	IGI	PMID:24658113	UniProtKB:D3ZZK3	9606	regulates_o_occurs_in(CL:0002608),causally_upstream_of(GO:1900271),regulates_o_occurs_in(GO:0043197)	20170627	P
ComplexPortal	CPX-1134	abeta-42-oligomer_human	involved_in	GO:1900272	negative regulation of long-term synaptic potentiation	ECO:0000316	IGI	PMID:24658113	UniProtKB:P00520,UniProtKB:Q03137	9606	regulates_o_occurs_in(UBERON:0003881)	20170627	P		ComplexPortal	CPX-1134	abeta-42-oligomer_human	involved_in	GO:1905244	regulation of modification of synaptic structure	ECO:0000316	IGI	PMID:24658113	UniProtKB:E9PT20	9606	regulates_o_occurs_in(CL:0002608),causally_upstream_of(GO:1900271),regulates_o_occurs_in(GO:0043197)	20170627	P
ComplexPortal	CPX-1134	abeta-42-oligomer_human	involved_in	GO:1901189	positive regulation of ephrin receptor signaling pathway	ECO:0000316	IGI	PMID:24658113	UniProtKB:Q03137	9606	regulates_o_occurs_in(CL:0002608),has_regulation_target(UniProtKB:P54764),negatively_regulates(GO:0060291)	20170627	P		ComplexPortal	CPX-1134	abeta-42-oligomer_human	involved_in	GO:1905244	regulation of modification of synaptic structure	ECO:0000316	IGI	PMID:24658113	UniProtKB:P00520,UniProtKB:Q03137	9606	regulates_o_occurs_in(CL:0002608),causally_upstream_of(GO:1900271),regulates_o_occurs_in(GO:0043197)	20170627	P
ComplexPortal	CPX-1134	abeta-42-oligomer_human	involved_in	GO:1905244	regulation of modification of synaptic structure	ECO:0000316	IGI	PMID:24658113	UniProtKB:D3ZZK3	9606	regulates_o_occurs_in(CL:0002608),causally_upstream_of(GO:1900271),regulates_o_occurs_in(GO:0043197)	20170627	P		ComplexPortal	CPX-1134	abeta-42-oligomer_human	colocalizes_with	GO:0043005	neuron projection	ECO:0000314	IDA	PMID:25390368		9606	part_of(CL:0002608)	20170627	C
ComplexPortal	CPX-1134	abeta-42-oligomer_human	involved_in	GO:1905244	regulation of modification of synaptic structure	ECO:0000316	IGI	PMID:24658113	UniProtKB:E9PT20	9606	regulates_o_occurs_in(CL:0002608),causally_upstream_of(GO:1900271),regulates_o_occurs_in(GO:0043197)	20170627	P		ComplexPortal	CPX-1134	abeta-42-oligomer_human	colocalizes_with	GO:0044297	cell body	ECO:0000314	IDA	PMID:25390368		9606	part_of(CL:0000125),part_of(UBERON:0002421)|part_of(CL:0002608)	20170627	C
ComplexPortal	CPX-1134	abeta-42-oligomer_human	involved_in	GO:1905244	regulation of modification of synaptic structure	ECO:0000316	IGI	PMID:24658113	UniProtKB:P00520,UniProtKB:Q03137	9606	regulates_o_occurs_in(CL:0002608),causally_upstream_of(GO:1900271),regulates_o_occurs_in(GO:0043197)	20170627	P		ComplexPortal	CPX-1134	abeta-42-oligomer_human	colocalizes_with	GO:0098793	presynapse	ECO:0000314	IDA	PMID:25390368		9606	part_of(CL:0002608)	20170627	C
ComplexPortal	CPX-1134	abeta-42-oligomer_human	colocalizes_with	GO:0043005	neuron projection	ECO:0000314	IDA	PMID:25390368		9606	part_of(CL:0002608)	20170627	C		ComplexPortal	CPX-1134	abeta-42-oligomer_human	colocalizes_with	GO:0098794	postsynapse	ECO:0000314	IDA	PMID:25390368		9606	part_of(CL:0002608)	20170627	C
ComplexPortal	CPX-1134	abeta-42-oligomer_human	colocalizes_with	GO:0044297	cell body	ECO:0000314	IDA	PMID:25390368		9606	part_of(CL:0000125),part_of(UBERON:0002421)|part_of(CL:0002608)	20170627	C		ComplexPortal	CPX-1134	abeta-42-oligomer_human	enables	GO:0005102	signaling receptor binding	ECO:0000314	IDA	PMID:25390368		9606	occurs_in(GO:0045202)	20170627	F
ComplexPortal	CPX-1134	abeta-42-oligomer_human	colocalizes_with	GO:0098793	presynapse	ECO:0000314	IDA	PMID:25390368		9606	part_of(CL:0002608)	20170627	C		ComplexPortal	CPX-1134	abeta-42-oligomer_human	involved_in	GO:0007613	memory	ECO:0000316	IGI	PMID:25390368	UniProtKB:P70580	9606		20170627	P
ComplexPortal	CPX-1134	abeta-42-oligomer_human	colocalizes_with	GO:0098794	postsynapse	ECO:0000314	IDA	PMID:25390368		9606	part_of(CL:0002608)	20170627	C		ComplexPortal	CPX-1134	abeta-42-oligomer_human	involved_in	GO:0008306	associative learning	ECO:0000316	IGI	PMID:25390368	UniProtKB:P70580	9606		20170627	P
ComplexPortal	CPX-1134	abeta-42-oligomer_human	enables	GO:0005102	signaling receptor binding	ECO:0000314	IDA	PMID:25390368		9606	occurs_in(GO:0045202)	20170627	F		ComplexPortal	CPX-1134	abeta-42-oligomer_human	involved_in	GO:0045921	positive regulation of exocytosis	ECO:0000314	IDA	PMID:25390368		9606	regulates_o_occurs_in(CL:0002608)	20170627	P
ComplexPortal	CPX-1134	abeta-42-oligomer_human	involved_in	GO:0007613	memory	ECO:0000316	IGI	PMID:25390368	UniProtKB:P70580	9606		20170627	P		ComplexPortal	CPX-1134	abeta-42-oligomer_human	involved_in	GO:0060627	regulation of vesicle-mediated transport	ECO:0000314	IDA	PMID:25390368		9606	regulates_o_occurs_in(GO:0045202)	20170627	P
ComplexPortal	CPX-1134	abeta-42-oligomer_human	involved_in	GO:0008306	associative learning	ECO:0000316	IGI	PMID:25390368	UniProtKB:P70580	9606		20170627	P		ComplexPortal	CPX-1134	abeta-42-oligomer_human	involved_in	GO:0060627	regulation of vesicle-mediated transport	ECO:0000314	IDA	PMID:25390368		9606	regulates_o_occurs_in(GO:0045202),regulates_o_occurs_in(CL:0000540)	20170627	P
ComplexPortal	CPX-1134	abeta-42-oligomer_human	involved_in	GO:0045921	positive regulation of exocytosis	ECO:0000314	IDA	PMID:25390368		9606	regulates_o_occurs_in(CL:0002608)	20170627	P		ComplexPortal	CPX-1134	abeta-42-oligomer_human	involved_in	GO:0099563	modification of synaptic structure	ECO:0000316	IGI	PMID:25390368	UniProtKB:P70580	9606	occurs_in(UBERON:0002421)|occurs_in(UBERON:0000956)	20170627	P
ComplexPortal	CPX-1134	abeta-42-oligomer_human	involved_in	GO:0060627	regulation of vesicle-mediated transport	ECO:0000314	IDA	PMID:25390368		9606	regulates_o_occurs_in(GO:0045202)	20170627	P		ComplexPortal	CPX-1134	abeta-42-oligomer_human	involved_in	GO:1905809	negative regulation of synapse organization	ECO:0000316	IGI	PMID:25390368	UniProtKB:P70580	9606	occurs_in(UBERON:0002421)|occurs_in(UBERON:0000956)	20170627	P
ComplexPortal	CPX-1134	abeta-42-oligomer_human	involved_in	GO:0060627	regulation of vesicle-mediated transport	ECO:0000314	IDA	PMID:25390368		9606	regulates_o_occurs_in(GO:0045202),regulates_o_occurs_in(CL:0000540)	20170627	P		ComplexPortal	CPX-1134	abeta-42-oligomer_human	involved_in	GO:0090647	modulation of age-related behavioral decline	ECO:0000304	TAS	PMID:25390368		9606		20170628	P
ComplexPortal	CPX-1134	abeta-42-oligomer_human	involved_in	GO:0099563	modification of synaptic structure	ECO:0000316	IGI	PMID:25390368	UniProtKB:P70580	9606	occurs_in(UBERON:0002421)|occurs_in(UBERON:0000956)	20170627	P		ComplexPortal	CPX-1134	abeta-42-oligomer_human	colocalizes_with	GO:0009986	cell surface	ECO:0000314	IDA	PMID:25390692		9606	part_of(CL:0002608),part_of(CL:0002609)	20170627	C
ComplexPortal	CPX-1134	abeta-42-oligomer_human	involved_in	GO:1905809	negative regulation of synapse organization	ECO:0000316	IGI	PMID:25390368	UniProtKB:P70580	9606	occurs_in(UBERON:0002421)|occurs_in(UBERON:0000956)	20170627	P		ComplexPortal	CPX-1134	abeta-42-oligomer_human	involved_in	GO:0010628	positive regulation of gene expression	ECO:0000314	IDA	PMID:25390692		9606	regulates_o_occurs_in(CL:0000540),regulates_o_occurs_in(CL:0000125),regulates_expression_of(ENSEMBL:ENSRNOG00000012786)	20170627	P
ComplexPortal	CPX-1134	abeta-42-oligomer_human	involved_in	GO:0090647	modulation of age-related behavioral decline	ECO:0000304	TAS	PMID:25390368		9606		20170628	P		ComplexPortal	CPX-1134	abeta-42-oligomer_human	involved_in	GO:0060627	regulation of vesicle-mediated transport	ECO:0000315	IMP	PMID:25390692		9606	occurs_in(UBERON:0002421),regulates_o_occurs_in(CL:0000540),regulates_o_occurs_in(CL:0000125)	20170627	P
ComplexPortal	CPX-1134	abeta-42-oligomer_human	colocalizes_with	GO:0009986	cell surface	ECO:0000314	IDA	PMID:25390692		9606	part_of(CL:0002608),part_of(CL:0002609)	20170627	C		ComplexPortal	CPX-1134	abeta-42-oligomer_human	enables	GO:0033142	progesterone receptor binding	ECO:0000314	IDA	PMID:25390692		9606	occurs_in(UBERON:0002421),occurs_in(CL:0000540),occurs_at(GO:0009986)|occurs_in(UBERON:0002421),occurs_in(CL:0000125),occurs_at(GO:0009986)	20180502	F
ComplexPortal	CPX-1134	abeta-42-oligomer_human	involved_in	GO:0010628	positive regulation of gene expression	ECO:0000314	IDA	PMID:25390692		9606	regulates_o_occurs_in(CL:0000540),regulates_o_occurs_in(CL:0000125),regulates_expression_of(ENSEMBL:ENSRNOG00000012786)	20170627	P		ComplexPortal	CPX-1134	abeta-42-oligomer_human	involved_in	GO:0010628	positive regulation of gene expression	ECO:0000304	TAS	PMID:25556849		9606	regulates_expression_of(ENSEMBL:ENSG00000157540)	20180130	P
ComplexPortal	CPX-1134	abeta-42-oligomer_human	involved_in	GO:0060627	regulation of vesicle-mediated transport	ECO:0000315	IMP	PMID:25390692		9606	occurs_in(UBERON:0002421),regulates_o_occurs_in(CL:0000540),regulates_o_occurs_in(CL:0000125)	20170627	P		ComplexPortal	CPX-1134	abeta-42-oligomer_human	involved_in	GO:1905809	negative regulation of synapse organization	ECO:0000304	TAS	PMID:26224839		9606		20170831	P
ComplexPortal	CPX-1134	abeta-42-oligomer_human	enables	GO:0033142	progesterone receptor binding	ECO:0000314	IDA	PMID:25390692		9606	occurs_in(UBERON:0002421),occurs_in(CL:0000540),occurs_at(GO:0009986)|occurs_in(UBERON:0002421),occurs_in(CL:0000125),occurs_at(GO:0009986)	20180502	F		ComplexPortal	CPX-1134	abeta-42-oligomer_human	involved_in	GO:2000310	regulation of NMDA receptor activity	ECO:0000304	TAS	PMID:26224839		9606	causally_upstream_of(GO:1905809)	20170831	P
ComplexPortal	CPX-1134	abeta-42-oligomer_human	involved_in	GO:0010628	positive regulation of gene expression	ECO:0000304	TAS	PMID:25556849		9606	regulates_expression_of(ENSEMBL:ENSG00000157540)	20180130	P		ComplexPortal	CPX-1139	abeta-42-oligomer_mouse	colocalizes_with	GO:0030425	dendrite	ECO:0000353	IPI	PMID:19242475	UniProtKB:P04925	10090	part_of(UBERON:0002421)	20170626	C
ComplexPortal	CPX-1134	abeta-42-oligomer_human	involved_in	GO:1905809	negative regulation of synapse organization	ECO:0000304	TAS	PMID:26224839		9606		20170831	P		ComplexPortal	CPX-1139	abeta-42-oligomer_mouse	enables	GO:0005515	protein binding	ECO:0000353	IPI	PMID:19242475	UniProtKB:P04925	10090	has_direct_input(UniProtKB:P04156),part_of(GO:1900272)	20170626	F
ComplexPortal	CPX-1134	abeta-42-oligomer_human	involved_in	GO:2000310	regulation of NMDA receptor activity	ECO:0000304	TAS	PMID:26224839		9606	causally_upstream_of(GO:1905809)	20170831	P		ComplexPortal	CPX-1139	abeta-42-oligomer_mouse	involved_in	GO:0007613	memory	ECO:0000304	TAS	PMID:19242475		10090		20170626	P
UniProtKB	P00519	ABL1	enables	GO:0046875	ephrin receptor binding	ECO:0000250	ISS	GO_REF:0000024	UniProtKB:P00520	9606	occurs_in(CL:0002608)	20170627	F		ComplexPortal	CPX-1139	abeta-42-oligomer_mouse	involved_in	GO:1900272	negative regulation of long-term synaptic potentiation	ECO:0000316	IGI	PMID:19242475	UniProtKB:P04925	10090	occurs_in(UBERON:0002421)	20170626	P
UniProtKB	P00519	ABL1	involved_in	GO:1900272	negative regulation of long-term synaptic potentiation	ECO:0000250	ISS	GO_REF:0000024	UniProtKB:P00520	9606	regulates_o_occurs_in(UBERON:0003881)	20170627	P		ComplexPortal	CPX-1139	abeta-42-oligomer_mouse	involved_in	GO:1902951	negative regulation of dendritic spine maintenance	ECO:0000304	TAS	PMID:19242475		10090		20170626	P
UniProtKB	P00519	ABL1	involved_in	GO:1905244	regulation of modification of synaptic structure	ECO:0000250	ISS	GO_REF:0000024	UniProtKB:E9PT20	9606	regulates_o_occurs_in(CL:0002608),causally_upstream_of(GO:1900271),regulates_o_occurs_in(GO:0043197)	20170627	P		ComplexPortal	CPX-1139	abeta-42-oligomer_mouse	part_of	GO:0014069	postsynaptic density	ECO:0000314	IDA	PMID:19242475		10090		20170626	C
UniProtKB	P00519	ABL1	involved_in	GO:1905244	regulation of modification of synaptic structure	ECO:0000250	ISS	GO_REF:0000024	UniProtKB:P00520	9606	regulates_o_occurs_in(CL:0002608),causally_upstream_of(GO:1900271),regulates_o_occurs_in(GO:0043197)	20170627	P		ComplexPortal	CPX-1139	abeta-42-oligomer_mouse	involved_in	GO:0050731	positive regulation of peptidyl-tyrosine phosphorylation	ECO:0000314	IDA	PMID:22820466		10090	occurs_in(CL:0002609),has_regulation_target(UniProtKB:P06241)	20170626	P
UniProtKB	P00519	ABL1	part_of	GO:0005634	nucleus	ECO:0000250	ISS	GO_REF:0000024	UniProtKB:E9PT20	9606	part_of(CL:0002608)	20170627	C		ComplexPortal	CPX-1183	abeta-42-oligomer_rat	involved_in	GO:0010800	positive regulation of peptidyl-threonine phosphorylation	ECO:0000316	IGI	PMID:15447668	UniProtKB:Q05941	10116	has_regulation_target(UniProtKB:Q63531),occurs_in(UBERON:0002421)	20170831	P
UniProtKB	P00519	ABL1	part_of	GO:0030425	dendrite	ECO:0000250	ISS	GO_REF:0000024	UniProtKB:E9PT20	9606	part_of(CL:0002608)	20170627	C		ComplexPortal	CPX-1183	abeta-42-oligomer_rat	involved_in	GO:0070374	positive regulation of ERK1 and ERK2 cascade	ECO:0000314	IDA	PMID:15447668		10116	occurs_in(UBERON:0002421)	20170831	P
UniProtKB	P00519	ABL1	part_of	GO:0043025	neuronal cell body	ECO:0000250	ISS	GO_REF:0000024	UniProtKB:E9PT20	9606	part_of(CL:0002608)	20170627	C		UniProtKB	P00519	ABL1	part_of	GO:0098794	postsynapse	ECO:0000304	TAS	PMID:24658113		9606		20170627	C
UniProtKB	P00519	ABL1	part_of	GO:0098794	postsynapse	ECO:0000304	TAS	PMID:24658113		9606		20170627	C		UniProtKB	P00520	Abl1	enables	GO:0046875	ephrin receptor binding	ECO:0000353	IPI	PMID:24658113	UniProtKB:D3ZZK3	10090	occurs_in(CL:0002608)	20170627	F
UniProtKB	P60709	ACTB	involved_in	GO:0032091	negative regulation of protein binding	ECO:0000250	ISS	GO_REF:0000024	UniProtKB:P60710	9606	has_regulation_target(UniProtKB:Q15078),has_regulation_target(UniProtKB:Q00535)	20171103	P		UniProtKB	P00520	Abl1	involved_in	GO:1900272	negative regulation of long-term synaptic potentiation	ECO:0000316	IGI	PMID:24658113	ComplexPortal:CPX-1134,UniProtKB:Q03137	10090	regulates_o_occurs_in(UBERON:0003881)	20170627	P
UniProtKB	P60709	ACTB	involved_in	GO:0000079	regulation of cyclin-dependent protein serine/threonine kinase activity	ECO:0000250	ISS	GO_REF:0000024	UniProtKB:P60711	9606	has_regulation_target(UniProtKB:Q00535),happens_during(GO:0031532)	20180514	P		UniProtKB	P00520	Abl1	involved_in	GO:1905244	regulation of modification of synaptic structure	ECO:0000316	IGI	PMID:24658113	ComplexPortal:CPX-1134,UniProtKB:Q03137	10090	regulates_o_occurs_in(CL:0002608),causally_upstream_of(GO:1900271),regulates_o_occurs_in(GO:0043197)	20170627	P
UniProtKB	P60709	ACTB	part_of	GO:0005856	cytoskeleton	ECO:0000250	ISS	GO_REF:0000024	UniProtKB:P60711	9606	part_of(UBERON:0000955)	20180514	C		UniProtKB	E9PT20	Abl1	involved_in	GO:1905244	regulation of modification of synaptic structure	ECO:0000316	IGI	PMID:24658113	ComplexPortal:CPX-1134	10116	regulates_o_occurs_in(CL:0002608),causally_upstream_of(GO:1900271),regulates_o_occurs_in(GO:0043197)	20170627	P
UniProtKB	P60709	ACTB	involved_in	GO:0051623	positive regulation of norepinephrine uptake	ECO:0000304	TAS	PMID:18331289		9606		20180514	P		UniProtKB	E9PT20	Abl1	part_of	GO:0005634	nucleus	ECO:0000314	IDA	PMID:24658113		10116	part_of(CL:0002608)	20170627	C
UniProtKB	P60709	ACTB	part_of	GO:0098793	presynapse	ECO:0000304	TAS	PMID:18331289		9606		20180514	C		UniProtKB	E9PT20	Abl1	part_of	GO:0030425	dendrite	ECO:0000314	IDA	PMID:24658113		10116	part_of(CL:0002608)	20170627	C
UniProtKB	P60709	ACTB	enables	GO:0005515	protein binding	ECO:0000353	IPI	PMID:18331289	UniProtKB:P23975	9606		20180515	F		UniProtKB	E9PT20	Abl1	part_of	GO:0043025	neuronal cell body	ECO:0000314	IDA	PMID:24658113		10116	part_of(CL:0002608)	20170627	C
UniProtKB	P60709	ACTB	enables	GO:0005515	protein binding	ECO:0000353	IPI	PMID:18331289	UniProtKB:P37840	9606		20180515	F		UniProtKB	P60711	Actb	involved_in	GO:0000079	regulation of cyclin-dependent protein serine/threonine kinase activity	ECO:0000315	IMP	PMID:10683146		10116	has_regulation_target(UniProtKB:Q03114),happens_during(GO:0031532)	20180514	P
UniProtKB	P60709	ACTB	involved_in	GO:0022898	regulation of transmembrane transporter activity	ECO:0000250	ISS	PMID:18331289	UniProtKB:P60711	9606	has_regulation_target(UniProtKB:P23975),regulates_transport_of(CHEBI:33569),occurs_in(CL:0000540),occurs_in(UBERON:0001870)	20180515	P		UniProtKB	P60711	Actb	part_of	GO:0005856	cytoskeleton	ECO:0000314	IDA	PMID:10683146		10116	part_of(UBERON:0000955)	20180514	C
UniProtKB	P60709	ACTB	involved_in	GO:0022898	regulation of transmembrane transporter activity	ECO:0000250	ISS	PMID:18331289	UniProtKB:P60711	9606	has_regulation_target(UniProtKB:P23975),regulates_transport_of(CHEBI:33569),occurs_in(CL:0000540),occurs_in(UBERON:0002148)	20180515	P		UniProtKB	P60710	Actb	enables	GO:0005515	protein binding	ECO:0000353	IPI	PMID:10683146	UniProtKB:O35926	10090	occurs_in(UBERON:0000955)	20180515	F
UniProtKB	P60709	ACTB	involved_in	GO:0022898	regulation of transmembrane transporter activity	ECO:0000316	IGI	PMID:18331289	UniProtKB:P37840	9606	has_regulation_target(UniProtKB:P23975),regulates_transport_of(CHEBI:33569)	20180515	P		UniProtKB	P60709	ACTB	involved_in	GO:0051623	positive regulation of norepinephrine uptake	ECO:0000304	TAS	PMID:18331289		9606		20180514	P
UniProtKB	P60709	ACTB	involved_in	GO:0051621	regulation of norepinephrine uptake	ECO:0000250	ISS	PMID:18331289	UniProtKB:P60711	9606	part_of(GO:0022898),occurs_in(CL:0000540),occurs_in(UBERON:0001870)	20180515	P		UniProtKB	P60709	ACTB	part_of	GO:0098793	presynapse	ECO:0000304	TAS	PMID:18331289		9606		20180514	C
UniProtKB	P60709	ACTB	involved_in	GO:0051621	regulation of norepinephrine uptake	ECO:0000250	ISS	PMID:18331289	UniProtKB:P60711	9606	part_of(GO:0022898),occurs_in(CL:0000540),occurs_in(UBERON:0002148)	20180515	P		UniProtKB	P60709	ACTB	enables	GO:0005515	protein binding	ECO:0000353	IPI	PMID:18331289	UniProtKB:P23975	9606		20180515	F
UniProtKB	P60709	ACTB	involved_in	GO:0051621	regulation of norepinephrine uptake	ECO:0000316	IGI	PMID:18331289	UniProtKB:P37840	9606	part_of(GO:0022898)	20180515	P		UniProtKB	P60709	ACTB	enables	GO:0005515	protein binding	ECO:0000353	IPI	PMID:18331289	UniProtKB:P37840	9606		20180515	F
UniProtKB	P60709	ACTB	involved_in	GO:1903076	regulation of protein localization to plasma membrane	ECO:0000315	IMP	PMID:18331289		9606	has_regulation_target(UniProtKB:P23975),regulates(GO:0015874)	20180515	P		UniProtKB	P60709	ACTB	involved_in	GO:0022898	regulation of transmembrane transporter activity	ECO:0000250	ISS	PMID:18331289	UniProtKB:P60711	9606	has_regulation_target(UniProtKB:P23975),regulates_transport_of(CHEBI:33569),occurs_in(CL:0000540),occurs_in(UBERON:0001870)	20180515	P
UniProtKB	P60709	ACTB	part_of	GO:0005856	cytoskeleton	ECO:0000314	IDA	PMID:24327345		9606		20171204	C		UniProtKB	P60709	ACTB	involved_in	GO:0022898	regulation of transmembrane transporter activity	ECO:0000250	ISS	PMID:18331289	UniProtKB:P60711	9606	has_regulation_target(UniProtKB:P23975),regulates_transport_of(CHEBI:33569),occurs_in(CL:0000540),occurs_in(UBERON:0002148)	20180515	P
UniProtKB	P60709	ACTB	enables	GO:0019901	protein kinase binding	ECO:0000353	IPI	PMID:24327345	UniProtKB:Q13627-2	9606		20180115	F		UniProtKB	P60709	ACTB	involved_in	GO:0022898	regulation of transmembrane transporter activity	ECO:0000316	IGI	PMID:18331289	UniProtKB:P37840	9606	has_regulation_target(UniProtKB:P23975),regulates_transport_of(CHEBI:33569)	20180515	P
UniProtKB	P60709	ACTB	part_of	GO:0005737	cytoplasm	ECO:0000314	IDA	PMID:24327345		9606		20180514	C		UniProtKB	P60709	ACTB	involved_in	GO:0051621	regulation of norepinephrine uptake	ECO:0000250	ISS	PMID:18331289	UniProtKB:P60711	9606	part_of(GO:0022898),occurs_in(CL:0000540),occurs_in(UBERON:0001870)	20180515	P
UniProtKB	P60709	ACTB	enables	GO:0048156	tau protein binding	ECO:0000303	NAS	PMID:28386764		9606		20181030	F		UniProtKB	P60709	ACTB	involved_in	GO:0051621	regulation of norepinephrine uptake	ECO:0000250	ISS	PMID:18331289	UniProtKB:P60711	9606	part_of(GO:0022898),occurs_in(CL:0000540),occurs_in(UBERON:0002148)	20180515	P
UniProtKB	P35318	ADM	involved_in	GO:0097647	amylin receptor signaling pathway	ECO:0000316	IGI	PMID:22500019	ComplexPortal:CPX-3186	9606		20170524	P		UniProtKB	P60709	ACTB	involved_in	GO:0051621	regulation of norepinephrine uptake	ECO:0000316	IGI	PMID:18331289	UniProtKB:P37840	9606	part_of(GO:0022898)	20180515	P
UniProtKB	P35318	ADM	involved_in	GO:0097647	amylin receptor signaling pathway	ECO:0000316	IGI	PMID:22500019	UniProtKB:O60894,UniProtKB:P30988	9606		20170524	P		UniProtKB	P60709	ACTB	involved_in	GO:1903076	regulation of protein localization to plasma membrane	ECO:0000315	IMP	PMID:18331289		9606	has_regulation_target(UniProtKB:P23975),regulates(GO:0015874)	20180515	P
UniProtKB	P35318	ADM	involved_in	GO:0097647	amylin receptor signaling pathway	ECO:0000316	IGI	PMID:22500019	UniProtKB:O60895,UniProtKB:P30988	9606		20170524	P		UniProtKB	P60711	Actb	involved_in	GO:0022898	regulation of transmembrane transporter activity	ECO:0000315	IMP	PMID:18331289		10116	has_regulation_target(UniProtKB:F1LNR9),regulates_transport_of(CHEBI:33569),occurs_in(CL:0000540),occurs_in(UBERON:0001870)	20180515	P
UniProtKB	P07550	ADRB2	enables	GO:0001540	amyloid-beta binding	ECO:0000314	IDA	PMID:20395454		9606	has_input(ComplexPortal:CPX-1070)	20170525	F		UniProtKB	P60711	Actb	involved_in	GO:0022898	regulation of transmembrane transporter activity	ECO:0000316	IGI	PMID:18331289	UniProtKB:P37840	10116	has_regulation_target(UniProtKB:F1LNR9),regulates_transport_of(CHEBI:33569),occurs_in(CL:0000540),occurs_in(UBERON:0002148)	20180515	P
UniProtKB	P07550	ADRB2	enables	GO:0004941	beta2-adrenergic receptor activity	ECO:0000303	NAS	PMID:20395454		9606	occurs_in(UBERON:0001017)	20170525	F		UniProtKB	P60711	Actb	involved_in	GO:0051621	regulation of norepinephrine uptake	ECO:0000315	IMP	PMID:18331289		10116	part_of(GO:0022898),occurs_in(CL:0000540),occurs_in(UBERON:0001870)	20180515	P
UniProtKB	P07550	ADRB2	enables	GO:0044877	protein-containing complex binding	ECO:0000353	IPI	PMID:20395454	ComplexPortal:CPX-1070	9606	occurs_in(GO:0009897)	20170525	F		UniProtKB	P60711	Actb	involved_in	GO:0051621	regulation of norepinephrine uptake	ECO:0000316	IGI	PMID:18331289	UniProtKB:P37840	10116	part_of(GO:0022898),occurs_in(CL:0000540),occurs_in(UBERON:0002148)	20180515	P
UniProtKB	P07550	ADRB2	involved_in	GO:0010739	positive regulation of protein kinase A signaling	ECO:0000316	IGI	PMID:20395454	ComplexPortal:CPX-1070,UniProtKB:P18762	9606	part_of(GO:1904646)	20170525	P		UniProtKB	P60710	Actb	involved_in	GO:0032091	negative regulation of protein binding	ECO:0000314	IDA	PMID:19118186		10090	has_regulation_target(UniProtKB:P61809),has_regulation_target(UniProtKB:P49615)	20171103	P
UniProtKB	P07550	ADRB2	involved_in	GO:0071902	positive regulation of protein serine/threonine kinase activity	ECO:0000316	IGI	PMID:20395454	ComplexPortal:CPX-1070	9606	part_of(GO:0010739),has_regulation_target(UniProtKB:P42261),positively_regulates(GO:0004971)	20170525	P		UniProtKB	P60710	Actb	involved_in	GO:1904030	negative regulation of cyclin-dependent protein kinase activity	ECO:0000305	IC	PMID:19118186	GO:0032091	10090	has_regulation_target(UniProtKB:P49615)	20171103	P
UniProtKB	P07550	ADRB2	involved_in	GO:1904646	cellular response to amyloid-beta	ECO:0000316	IGI	PMID:20395454	ComplexPortal:CPX-1070,UniProtKB:P18762	9606		20170525	P		UniProtKB	P60710	Actb	enables	GO:0005515	protein binding	ECO:0000353	IPI	PMID:19118186	UniProtKB:P61809	10090		20171215	F
UniProtKB	P07550	ADRB2	involved_in	GO:1990911	response to psychosocial stress	ECO:0000304	TAS	PMID:20395454		9606	has_regulation_target(UniProtKB:Q05586),part_of(GO:1990911)	20170525	P		UniProtKB	P60709	ACTB	part_of	GO:0005856	cytoskeleton	ECO:0000314	IDA	PMID:24327345		9606		20171204	C
UniProtKB	P07550	ADRB2	involved_in	GO:2000481	positive regulation of cAMP-dependent protein kinase activity	ECO:0000304	TAS	PMID:20395454		9606	has_regulation_target(UniProtKB:Q05586),part_of(GO:1990911)	20170525	P		UniProtKB	P60710	Actb	part_of	GO:0005856	cytoskeleton	ECO:0000314	IDA	PMID:24327345		10090		20171204	C
UniProtKB	P07550	ADRB2	involved_in	GO:2000969	positive regulation of AMPA receptor activity	ECO:0000316	IGI	PMID:20395454	ComplexPortal:CPX-1070	9606	part_of(GO:0010739),has_regulation_target(UniProtKB:P42261)	20170525	P		UniProtKB	P60709	ACTB	enables	GO:0019901	protein kinase binding	ECO:0000353	IPI	PMID:24327345	UniProtKB:Q13627-2	9606		20180115	F
UniProtKB	P07550	ADRB2	part_of	GO:0016020	membrane	ECO:0000303	NAS	PMID:20395454		9606		20170525	C		UniProtKB	P60709	ACTB	part_of	GO:0005737	cytoplasm	ECO:0000314	IDA	PMID:24327345		9606		20180514	C
UniProtKB	Q99490	AGAP2	enables	GO:0003924	GTPase activity	ECO:0000304	TAS	PMID:18374643		9606	occurs_in(UBERON:0000955),positively_regulates(GO:0016303)	20180307	F		UniProtKB	P60710	Actb	part_of	GO:0005737	cytoplasm	ECO:0000314	IDA	PMID:24327345		10090		20180514	C
UniProtKB	Q99490	AGAP2	involved_in	GO:0061903	positive regulation of 1-phosphatidylinositol-3-kinase activity	ECO:0000304	TAS	PMID:18374643		9606	occurs_in(UBERON:0000955)	20180307	P		UniProtKB	P60709	ACTB	enables	GO:0048156	tau protein binding	ECO:0000303	NAS	PMID:28386764		9606		20181030	F
UniProtKB	Q99490	AGAP2	part_of	GO:0005634	nucleus	ECO:0000304	TAS	PMID:18374643		9606	part_of(UBERON:0000955)	20180307	C		UniProtKB	P35318	ADM	involved_in	GO:0097647	amylin receptor signaling pathway	ECO:0000316	IGI	PMID:22500019	ComplexPortal:CPX-3186	9606		20170524	P
UniProtKB	Q99490	AGAP2	part_of	GO:0005737	cytoplasm	ECO:0000304	TAS	PMID:18374643		9606		20180307	C		UniProtKB	P35318	ADM	involved_in	GO:0097647	amylin receptor signaling pathway	ECO:0000316	IGI	PMID:22500019	UniProtKB:O60894,UniProtKB:P30988	9606		20170524	P
UniProtKB	Q15109	AGER	involved_in	GO:1900272	negative regulation of long-term synaptic potentiation	ECO:0000250	ISS	GO_REF:0000024	UniProtKB:Q62151	9606	occurs_in(UBERON:0002728),regulates_o_occurs_in(UBERON:0002728),part_of(GO:1904645)	20170927	P		UniProtKB	P35318	ADM	involved_in	GO:0097647	amylin receptor signaling pathway	ECO:0000316	IGI	PMID:22500019	UniProtKB:O60895,UniProtKB:P30988	9606		20170524	P
UniProtKB	Q15109	AGER	involved_in	GO:1900744	regulation of p38MAPK cascade	ECO:0000250	ISS	GO_REF:0000024	UniProtKB:Q62151	9606	occurs_in(UBERON:0002728),regulates_o_occurs_in(UBERON:0002728),regulates(GO:0060291),regulates_o_occurs_in(CL:0002609),part_of(GO:1904646)	20170927	P		UniProtKB	P07550	ADRB2	enables	GO:0001540	amyloid-beta binding	ECO:0000314	IDA	PMID:20395454		9606	has_input(ComplexPortal:CPX-1070)	20170525	F
UniProtKB	Q15109	AGER	involved_in	GO:1904645	response to amyloid-beta	ECO:0000250	ISS	GO_REF:0000024	UniProtKB:Q62151	9606	occurs_in(UBERON:0002728)	20170927	P		UniProtKB	P07550	ADRB2	enables	GO:0004941	beta2-adrenergic receptor activity	ECO:0000303	NAS	PMID:20395454		9606	occurs_in(UBERON:0001017)	20170525	F
UniProtKB	Q15109	AGER	involved_in	GO:1900271	regulation of long-term synaptic potentiation	ECO:0000250	ISS	GO_REF:0000024	UniProtKB:Q62151	9606	occurs_in(UBERON:0005391),regulates_o_occurs_in(UBERON:0005391)|occurs_in(UBERON:0005392),regulates_o_occurs_in(UBERON:0005392)	20171222	P		UniProtKB	P07550	ADRB2	enables	GO:0044877	protein-containing complex binding	ECO:0000353	IPI	PMID:20395454	ComplexPortal:CPX-1070	9606	occurs_in(GO:0009897)	20170525	F
UniProtKB	Q15109	AGER	involved_in	GO:1904646	cellular response to amyloid-beta	ECO:0000250	ISS	GO_REF:0000024	UniProtKB:Q62151	9606	occurs_in(UBERON:0005391)|occurs_in(UBERON:0005392)	20171222	P		UniProtKB	P07550	ADRB2	involved_in	GO:0010739	positive regulation of protein kinase A signaling	ECO:0000316	IGI	PMID:20395454	ComplexPortal:CPX-1070,UniProtKB:P18762	9606	part_of(GO:1904646)	20170525	P
UniProtKB	Q15109	AGER	enables	GO:0005044	scavenger receptor activity	ECO:0000304	TAS	PMID:11240025		9606	occurs_in(CL:0000113)|occurs_in(CL:0000129)	20170530	F		UniProtKB	P07550	ADRB2	involved_in	GO:0071902	positive regulation of protein serine/threonine kinase activity	ECO:0000316	IGI	PMID:20395454	ComplexPortal:CPX-1070	9606	part_of(GO:0010739),has_regulation_target(UniProtKB:P42261),positively_regulates(GO:0004971)	20170525	P
UniProtKB	Q15109	AGER	enables	GO:0001540	amyloid-beta binding	ECO:0000304	TAS	PMID:15457210		9606	part_of(GO:0048167)	20170928	F		UniProtKB	P07550	ADRB2	involved_in	GO:1904646	cellular response to amyloid-beta	ECO:0000316	IGI	PMID:20395454	ComplexPortal:CPX-1070,UniProtKB:P18762	9606		20170525	P
UniProtKB	Q15109	AGER	enables	GO:0038023	signaling receptor activity	ECO:0000315	IMP	PMID:15457210		9606	happens_during(UBERON:0018241),occurs_in(UBERON:0000956)|happens_during(GO:0007568),occurs_in(UBERON:0000956)	20170928	F		UniProtKB	P07550	ADRB2	involved_in	GO:1990911	response to psychosocial stress	ECO:0000304	TAS	PMID:20395454		9606	has_regulation_target(UniProtKB:Q05586),part_of(GO:1990911)	20170525	P
UniProtKB	Q15109	AGER	enables	GO:0050785	advanced glycation end-product receptor activity	ECO:0000303	NAS	PMID:15457210		9606	regulates(GO:0038061)	20170928	F		UniProtKB	P07550	ADRB2	involved_in	GO:2000481	positive regulation of cAMP-dependent protein kinase activity	ECO:0000304	TAS	PMID:20395454		9606	has_regulation_target(UniProtKB:Q05586),part_of(GO:1990911)	20170525	P
UniProtKB	Q15109	AGER	involved_in	GO:0001934	positive regulation of protein phosphorylation	ECO:0000316	IGI	PMID:15457210	UniProtKB:P05067	9606	happens_during(UBERON:0007222),positively_regulates(GO:0004683),occurs_in(UBERON:0002421),regulates_o_occurs_in(UBERON:0002421)	20170928	P		UniProtKB	P07550	ADRB2	involved_in	GO:2000969	positive regulation of AMPA receptor activity	ECO:0000316	IGI	PMID:20395454	ComplexPortal:CPX-1070	9606	part_of(GO:0010739),has_regulation_target(UniProtKB:P42261)	20170525	P
UniProtKB	Q15109	AGER	involved_in	GO:0001934	positive regulation of protein phosphorylation	ECO:0000316	IGI	PMID:15457210	UniProtKB:P05067	9606	has_regulation_target(UniProtKB:Q16539),happens_during(UBERON:0018241)	20170928	P		UniProtKB	P07550	ADRB2	part_of	GO:0016020	membrane	ECO:0000303	NAS	PMID:20395454		9606		20170525	C
UniProtKB	Q15109	AGER	involved_in	GO:0001934	positive regulation of protein phosphorylation	ECO:0000316	IGI	PMID:15457210	UniProtKB:P05067	9606	part_of(GO:0032793),happens_during(UBERON:0018241)	20170928	P		UniProtKB	P18762	Adrb2	involved_in	GO:0010739	positive regulation of protein kinase A signaling	ECO:0000316	IGI	PMID:20395454	ComplexPortal:CPX-1070,UniProtKB:P07550	10090	part_of(GO:1904646)	20170525	P
UniProtKB	Q15109	AGER	involved_in	GO:0007611	learning or memory	ECO:0000316	IGI	PMID:15457210	UniProtKB:P05067	9606	happens_during(UBERON:0018241)	20170928	P		UniProtKB	P18762	Adrb2	involved_in	GO:1904646	cellular response to amyloid-beta	ECO:0000316	IGI	PMID:20395454	ComplexPortal:CPX-1070,UniProtKB:P07550	10090		20170525	P
UniProtKB	Q15109	AGER	involved_in	GO:0051092	positive regulation of NF-kappaB transcription factor activity	ECO:0000316	IGI	PMID:15457210	UniProtKB:P05067	9606	regulates_o_occurs_in(UBERON:0000956),occurs_in(UBERON:0000956),regulates_o_occurs_in(GO:0005634),regulates_o_occurs_in(UBERON:6003624)	20170928	P		UniProtKB	P10608	Adrb2	enables	GO:0005515	protein binding	ECO:0000353	IPI	PMID:20395454	UniProtKB:P12368	10116	occurs_in(UBERON:0000451)	20170525	F
UniProtKB	Q15109	AGER	involved_in	GO:0061890	positive regulation of astrocyte activation	ECO:0000316	IGI	PMID:15457210	UniProtKB:P05067	9606	regulates_o_occurs_in(UBERON:0000956),occurs_in(UBERON:0000956),happens_during(UBERON:0007222)|regulates_o_occurs_in(UBERON:0002421),occurs_in(UBERON:0002421),happens_during(UBERON:0007222)	20170928	P		UniProtKB	P10608	Adrb2	enables	GO:0005515	protein binding	ECO:0000353	IPI	PMID:20395454	UniProtKB:P24587	10116	occurs_in(UBERON:0000451)	20170525	F
UniProtKB	Q15109	AGER	involved_in	GO:0070374	positive regulation of ERK1 and ERK2 cascade	ECO:0000316	IGI	PMID:15457210	UniProtKB:P05067	9606	happens_during(UBERON:0018241)	20170928	P		UniProtKB	P10608	Adrb2	enables	GO:0005515	protein binding	ECO:0000353	IPI	PMID:20395454	UniProtKB:P31016	10116	occurs_in(UBERON:0000451)	20170525	F
UniProtKB	Q15109	AGER	involved_in	GO:0090647	modulation of age-related behavioral decline	ECO:0000316	IGI	PMID:15457210	UniProtKB:P05067	9606		20170928	P		UniProtKB	P10608	Adrb2	enables	GO:0035255	ionotropic glutamate receptor binding	ECO:0000353	IPI	PMID:20395454	UniProtKB:P19490	10116	occurs_in(UBERON:0000451)	20170525	F
UniProtKB	Q15109	AGER	involved_in	GO:1900272	negative regulation of long-term synaptic potentiation	ECO:0000316	IGI	PMID:15457210	UniProtKB:P05067	9606	occurs_in(UBERON:6003624),regulates_o_occurs_in(UBERON:0014554),happens_during(GO:0007568)	20170928	P		UniProtKB	P10608	Adrb2	enables	GO:0051721	protein phosphatase 2A binding	ECO:0000353	IPI	PMID:20395454	UniProtKB:P63331	10116	occurs_in(UBERON:0000451)	20170525	F
UniProtKB	Q15109	AGER	involved_in	GO:1901222	regulation of NIK/NF-kappaB signaling	ECO:0000303	NAS	PMID:15457210		9606		20170928	P		UniProtKB	P10608	Adrb2	enables	GO:0090722	receptor-receptor interaction	ECO:0000353	IPI	PMID:20395454	UniProtKB:P19490	10116	occurs_in(UBERON:0000451)	20170525	F
UniProtKB	Q15109	AGER	involved_in	GO:1901224	positive regulation of NIK/NF-kappaB signaling	ECO:0000316	IGI	PMID:15457210	UniProtKB:P05067	9606	regulates_o_occurs_in(UBERON:0000956),occurs_in(UBERON:0000956),regulates_o_occurs_in(GO:0005634),regulates_o_occurs_in(UBERON:6003624)	20170928	P		UniProtKB	P18762	Adrb2	involved_in	GO:0061885	positive regulation of mini excitatory postsynaptic potential	ECO:0000316	IGI	PMID:20395454	ComplexPortal:CPX-1070	10090	part_of(GO:2000969),regulates_o_occurs_in(CL:0000540)	20170612	P
UniProtKB	Q15109	AGER	involved_in	GO:1901224	positive regulation of NIK/NF-kappaB signaling	ECO:0000316	IGI	PMID:15457210	UniProtKB:P05067	9606	regulates_o_occurs_in(UBERON:0000956),occurs_in(UBERON:0000956),regulates_o_occurs_in(UBERON:6003624)	20170928	P		UniProtKB	Q99490	AGAP2	enables	GO:0003924	GTPase activity	ECO:0000304	TAS	PMID:18374643		9606	occurs_in(UBERON:0000955),positively_regulates(GO:0016303)	20180307	F
UniProtKB	Q15109	AGER	involved_in	GO:1903980	positive regulation of microglial cell activation	ECO:0000316	IGI	PMID:15457210	UniProtKB:P05067	9606	regulates_o_occurs_in(UBERON:0000956),occurs_in(UBERON:0000956),happens_during(UBERON:0007222)|regulates_o_occurs_in(UBERON:0002421),occurs_in(UBERON:0002421),happens_during(UBERON:0007222)	20170928	P		UniProtKB	Q99490	AGAP2	involved_in	GO:0061903	positive regulation of 1-phosphatidylinositol-3-kinase activity	ECO:0000304	TAS	PMID:18374643		9606	occurs_in(UBERON:0000955)	20180307	P
UniProtKB	Q15109	AGER	part_of	GO:0005887	integral component of plasma membrane	ECO:0000303	NAS	PMID:15457210		9606		20170928	C		UniProtKB	Q99490	AGAP2	part_of	GO:0005634	nucleus	ECO:0000304	TAS	PMID:18374643		9606	part_of(UBERON:0000955)	20180307	C
UniProtKB	Q15109	AGER	part_of	GO:0009986	cell surface	ECO:0000303	NAS	PMID:15457210		9606		20170928	C		UniProtKB	Q99490	AGAP2	part_of	GO:0005737	cytoplasm	ECO:0000304	TAS	PMID:18374643		9606		20180307	C
UniProtKB	Q15109	AGER	involved_in	GO:0150003	regulation of spontaneous synaptic transmission	ECO:0000316	IGI	PMID:15457210	UniProtKB:P05067	9606	happens_during(UBERON:0018241),occurs_in(UBERON:0014554)|happens_during(GO:0007568),occurs_in(UBERON:0014554)	20171215	P		UniProtKB	Q15109	AGER	enables	GO:0005044	scavenger receptor activity	ECO:0000304	TAS	PMID:11240025		9606	occurs_in(CL:0000113)|occurs_in(CL:0000129)	20170530	F
UniProtKB	Q15109	AGER	enables	GO:0001540	amyloid-beta binding	ECO:0000303	NAS	PMID:18367618		9606		20170927	F		UniProtKB	Q15109	AGER	enables	GO:0001540	amyloid-beta binding	ECO:0000304	TAS	PMID:15457210		9606	part_of(GO:0048167)	20170928	F
UniProtKB	Q15109	AGER	involved_in	GO:0048167	regulation of synaptic plasticity	ECO:0000304	TAS	PMID:18367618		9606	occurs_in(UBERON:0002421),part_of(GO:1904645),regulates_o_occurs_in(UBERON:0002421)	20170927	P		UniProtKB	Q15109	AGER	enables	GO:0038023	signaling receptor activity	ECO:0000315	IMP	PMID:15457210		9606	happens_during(UBERON:0018241),occurs_in(UBERON:0000956)|happens_during(GO:0007568),occurs_in(UBERON:0000956)	20170928	F
UniProtKB	Q15109	AGER	involved_in	GO:1904645	response to amyloid-beta	ECO:0000304	TAS	PMID:18367618		9606	occurs_in(UBERON:0002421)	20170927	P		UniProtKB	Q15109	AGER	enables	GO:0050785	advanced glycation end-product receptor activity	ECO:0000303	NAS	PMID:15457210		9606	regulates(GO:0038061)	20170928	F
UniProtKB	Q15109	AGER	involved_in	GO:0048167	regulation of synaptic plasticity	ECO:0000304	TAS	PMID:19221410		9606	part_of(GO:1904646)	20171222	P		UniProtKB	Q15109	AGER	involved_in	GO:0001934	positive regulation of protein phosphorylation	ECO:0000316	IGI	PMID:15457210	UniProtKB:P05067	9606	happens_during(UBERON:0007222),positively_regulates(GO:0004683),occurs_in(UBERON:0002421),regulates_o_occurs_in(UBERON:0002421)	20170928	P
UniProtKB	Q15109	AGER	involved_in	GO:0048167	regulation of synaptic plasticity	ECO:0000304	TAS	PMID:20739563		9606	occurs_in(UBERON:0002421),part_of(GO:1904645)|occurs_in(UBERON:0000956),part_of(GO:1904645)	20170516	P		UniProtKB	Q15109	AGER	involved_in	GO:0001934	positive regulation of protein phosphorylation	ECO:0000316	IGI	PMID:15457210	UniProtKB:P05067	9606	has_regulation_target(UniProtKB:Q16539),happens_during(UBERON:0018241)	20170928	P
UniProtKB	Q15109	AGER	involved_in	GO:1904645	response to amyloid-beta	ECO:0000304	TAS	PMID:20739563		9606	occurs_in(UBERON:0002421)|occurs_in(UBERON:0000956)	20170516	P		UniProtKB	Q15109	AGER	involved_in	GO:0001934	positive regulation of protein phosphorylation	ECO:0000316	IGI	PMID:15457210	UniProtKB:P05067	9606	part_of(GO:0032793),happens_during(UBERON:0018241)	20170928	P
UniProtKB	Q15109	AGER	involved_in	GO:0046330	positive regulation of JNK cascade	ECO:0000316	IGI	PMID:20739563	ComplexPortal:CPX-1134,UniProtKB:P10749	9606	occurs_in(UBERON:0002728),regulates(GO:0060292)	20170628	P		UniProtKB	Q15109	AGER	involved_in	GO:0007611	learning or memory	ECO:0000316	IGI	PMID:15457210	UniProtKB:P05067	9606	happens_during(UBERON:0018241)	20170928	P
UniProtKB	Q15109	AGER	involved_in	GO:1900453	negative regulation of long term synaptic depression	ECO:0000316	IGI	PMID:20739563	ComplexPortal:CPX-1134	9606	occurs_in(UBERON:0002728),occurs_in(CL:0000129)	20170628	P		UniProtKB	Q15109	AGER	involved_in	GO:0051092	positive regulation of NF-kappaB transcription factor activity	ECO:0000316	IGI	PMID:15457210	UniProtKB:P05067	9606	regulates_o_occurs_in(UBERON:0000956),occurs_in(UBERON:0000956),regulates_o_occurs_in(GO:0005634),regulates_o_occurs_in(UBERON:6003624)	20170928	P
UniProtKB	Q15109	AGER	involved_in	GO:1900745	positive regulation of p38MAPK cascade	ECO:0000316	IGI	PMID:20739563	ComplexPortal:CPX-1134,UniProtKB:P10749	9606	occurs_in(UBERON:0002728),regulates(GO:0060292)	20170628	P		UniProtKB	Q15109	AGER	involved_in	GO:0061890	positive regulation of astrocyte activation	ECO:0000316	IGI	PMID:15457210	UniProtKB:P05067	9606	regulates_o_occurs_in(UBERON:0000956),occurs_in(UBERON:0000956),happens_during(UBERON:0007222)|regulates_o_occurs_in(UBERON:0002421),occurs_in(UBERON:0002421),happens_during(UBERON:0007222)	20170928	P
UniProtKB	Q15109	AGER	part_of	GO:0016324	apical plasma membrane	ECO:0000314	IDA	PMID:26005850		9606	part_of(CL:0002144),part_of(UBERON:0013694)	20170522	C		UniProtKB	Q15109	AGER	involved_in	GO:0070374	positive regulation of ERK1 and ERK2 cascade	ECO:0000316	IGI	PMID:15457210	UniProtKB:P05067	9606	happens_during(UBERON:0018241)	20170928	P
UniProtKB	Q15109	AGER	part_of	GO:0098794	postsynapse	ECO:0000304	TAS	PMID:26224839		9606		20170329	C		UniProtKB	Q15109	AGER	involved_in	GO:0090647	modulation of age-related behavioral decline	ECO:0000316	IGI	PMID:15457210	UniProtKB:P05067	9606		20170928	P
UniProtKB	P31749	AKT1	involved_in	GO:0010628	positive regulation of gene expression	ECO:0000250	ISS	PMID:18292230	UniProtKB:P31750	9606	regulates_expression_of(ENSEMBL:ENSG00000103266),regulates_o_occurs_in(UBERON:0000955)	20180201	P		UniProtKB	Q15109	AGER	involved_in	GO:1900272	negative regulation of long-term synaptic potentiation	ECO:0000316	IGI	PMID:15457210	UniProtKB:P05067	9606	occurs_in(UBERON:6003624),regulates_o_occurs_in(UBERON:0014554),happens_during(GO:0007568)	20170928	P
UniProtKB	P31749	AKT1	involved_in	GO:0031397	negative regulation of protein ubiquitination	ECO:0000315	IMP	PMID:18292230		9606	has_regulation_target(UniProtKB:Q9UNE7),part_of(GO:0032091)	20180201	P		UniProtKB	Q15109	AGER	involved_in	GO:1901222	regulation of NIK/NF-kappaB signaling	ECO:0000303	NAS	PMID:15457210		9606		20170928	P
UniProtKB	P31749	AKT1	involved_in	GO:0032091	negative regulation of protein binding	ECO:0000315	IMP	PMID:18292230		9606	has_regulation_target(UniProtKB:Q9UNE7),has_regulation_target(UniProtKB:P10636)	20180201	P		UniProtKB	Q15109	AGER	involved_in	GO:1901224	positive regulation of NIK/NF-kappaB signaling	ECO:0000316	IGI	PMID:15457210	UniProtKB:P05067	9606	regulates_o_occurs_in(UBERON:0000956),occurs_in(UBERON:0000956),regulates_o_occurs_in(GO:0005634),regulates_o_occurs_in(UBERON:6003624)	20170928	P
UniProtKB	P31749	AKT1	enables	GO:0004674	protein serine/threonine kinase activity	ECO:0000303	NAS	PMID:28386764		9606	has_input(UniProtKB:P10636)	20180122	F		UniProtKB	Q15109	AGER	involved_in	GO:1901224	positive regulation of NIK/NF-kappaB signaling	ECO:0000316	IGI	PMID:15457210	UniProtKB:P05067	9606	regulates_o_occurs_in(UBERON:0000956),occurs_in(UBERON:0000956),regulates_o_occurs_in(UBERON:6003624)	20170928	P
UniProtKB	P31749	AKT1	involved_in	GO:0071901	negative regulation of protein serine/threonine kinase activity	ECO:0000304	TAS	PMID:28386764		9606	has_regulation_target(UniProtKB:P49841)	20180122	P		UniProtKB	Q15109	AGER	involved_in	GO:1903980	positive regulation of microglial cell activation	ECO:0000316	IGI	PMID:15457210	UniProtKB:P05067	9606	regulates_o_occurs_in(UBERON:0000956),occurs_in(UBERON:0000956),happens_during(UBERON:0007222)|regulates_o_occurs_in(UBERON:0002421),occurs_in(UBERON:0002421),happens_during(UBERON:0007222)	20170928	P
ComplexPortal	CPX-2173	amy1-receptor_human	enables	GO:0097643	amylin receptor activity	ECO:0000316	IGI	PMID:22500019	UniProtKB:P06881|UniProtKB:P10997:PRO_0000004106|UniProtKB:P12969:PRO_0000004122|UniProtKB:P35318	9606		20170524	F		UniProtKB	Q15109	AGER	part_of	GO:0005887	integral component of plasma membrane	ECO:0000303	NAS	PMID:15457210		9606		20170928	C
ComplexPortal	CPX-2173	amy1-receptor_human	involved_in	GO:0097647	amylin receptor signaling pathway	ECO:0000316	IGI	PMID:22500019	UniProtKB:P06881|UniProtKB:P10997:PRO_0000004106|UniProtKB:P12969|UniProtKB:P30988	9606		20170524	P		UniProtKB	Q15109	AGER	part_of	GO:0009986	cell surface	ECO:0000303	NAS	PMID:15457210		9606		20170928	C
ComplexPortal	CPX-3186	amy2-receptor_human	enables	GO:0097643	amylin receptor activity	ECO:0000316	IGI	PMID:22500019	UniProtKB:P12969:PRO_0000004122|UniProtKB:P35318	9606		20170524	F		UniProtKB	Q15109	AGER	involved_in	GO:0150003	regulation of spontaneous synaptic transmission	ECO:0000316	IGI	PMID:15457210	UniProtKB:P05067	9606	happens_during(UBERON:0018241),occurs_in(UBERON:0014554)|happens_during(GO:0007568),occurs_in(UBERON:0014554)	20171215	P
ComplexPortal	CPX-3186	amy2-receptor_human	involved_in	GO:0097647	amylin receptor signaling pathway	ECO:0000316	IGI	PMID:22500019	UniProtKB:P12969:PRO_0000004122|UniProtKB:P35318	9606		20170524	P		UniProtKB	Q15109	AGER	enables	GO:0001540	amyloid-beta binding	ECO:0000303	NAS	PMID:18367618		9606		20170927	F
ComplexPortal	CPX-3187	amy3-receptor_human	enables	GO:0097643	amylin receptor activity	ECO:0000316	IGI	PMID:22500019	UniProtKB:P10997:PRO_0000004106	9606		20170524	F		UniProtKB	Q15109	AGER	involved_in	GO:0048167	regulation of synaptic plasticity	ECO:0000304	TAS	PMID:18367618		9606	occurs_in(UBERON:0002421),part_of(GO:1904645),regulates_o_occurs_in(UBERON:0002421)	20170927	P
ComplexPortal	CPX-3187	amy3-receptor_human	involved_in	GO:0010628	positive regulation of gene expression	ECO:0000316	IGI	PMID:22500019	UniProtKB:P10997:PRO_0000004106	9606	regulates_expression_of(ENSEMBL:ENSG00000170345)	20170524	P		UniProtKB	Q15109	AGER	involved_in	GO:1904645	response to amyloid-beta	ECO:0000304	TAS	PMID:18367618		9606	occurs_in(UBERON:0002421)	20170927	P
ComplexPortal	CPX-3187	amy3-receptor_human	involved_in	GO:0010739	positive regulation of protein kinase A signaling	ECO:0000316	IGI	PMID:22500019	UniProtKB:P10997:PRO_0000004106	9606	has_regulation_target(UniProtKB:P13861)	20170524	P		UniProtKB	Q62151	Ager	involved_in	GO:1900272	negative regulation of long-term synaptic potentiation	ECO:0000316	IGI	PMID:18367618	ComplexPortal:CPX-1134	10090	occurs_in(UBERON:0002728),regulates_o_occurs_in(UBERON:0002728),part_of(GO:1904645)	20170927	P
ComplexPortal	CPX-3187	amy3-receptor_human	involved_in	GO:0010942	positive regulation of cell death	ECO:0000316	IGI	PMID:22500019	UniProtKB:P10997:PRO_0000004106	9606	regulates_expression_of(ENSEMBL:ENSG00000170345)	20170524	P		UniProtKB	Q62151	Ager	involved_in	GO:1900744	regulation of p38MAPK cascade	ECO:0000316	IGI	PMID:18367618	ComplexPortal:CPX-1134	10090	occurs_in(UBERON:0002728),regulates_o_occurs_in(UBERON:0002728),regulates(GO:0060291),regulates_o_occurs_in(CL:0002609),part_of(GO:1904646)	20170927	P
ComplexPortal	CPX-3187	amy3-receptor_human	involved_in	GO:0033138	positive regulation of peptidyl-serine phosphorylation	ECO:0000316	IGI	PMID:22500019	UniProtKB:P10997:PRO_0000004106	9606	has_regulation_target(UniProtKB:P13861)	20170524	P		UniProtKB	Q62151	Ager	involved_in	GO:1904645	response to amyloid-beta	ECO:0000316	IGI	PMID:18367618	ComplexPortal:CPX-1134	10090	occurs_in(UBERON:0002728)	20170927	P
ComplexPortal	CPX-3187	amy3-receptor_human	involved_in	GO:0051897	positive regulation of protein kinase B signaling	ECO:0000316	IGI	PMID:22500019	UniProtKB:P10997:PRO_0000004106	9606		20170524	P		UniProtKB	Q15109	AGER	involved_in	GO:0048167	regulation of synaptic plasticity	ECO:0000304	TAS	PMID:19221410		9606	part_of(GO:1904646)	20171222	P
ComplexPortal	CPX-3187	amy3-receptor_human	involved_in	GO:0070374	positive regulation of ERK1 and ERK2 cascade	ECO:0000316	IGI	PMID:22500019	UniProtKB:P10997:PRO_0000004106	9606		20170524	P		UniProtKB	Q62151	Ager	involved_in	GO:1900271	regulation of long-term synaptic potentiation	ECO:0000315	IMP	PMID:19221410		10090	occurs_in(UBERON:0005391),regulates_o_occurs_in(UBERON:0005391)|occurs_in(UBERON:0005392),regulates_o_occurs_in(UBERON:0005392)	20171222	P
ComplexPortal	CPX-3187	amy3-receptor_human	involved_in	GO:0097647	amylin receptor signaling pathway	ECO:0000316	IGI	PMID:22500019	UniProtKB:P10997:PRO_0000004106	9606		20170524	P		UniProtKB	Q62151	Ager	involved_in	GO:1904646	cellular response to amyloid-beta	ECO:0000315	IMP	PMID:19221410		10090	occurs_in(UBERON:0005391)|occurs_in(UBERON:0005392)	20171222	P
ComplexPortal	CPX-3187	amy3-receptor_human	involved_in	GO:1905665	positive regulation of calcium ion import across plasma membrane	ECO:0000316	IGI	PMID:22500019	UniProtKB:P10997:PRO_0000004106	9606		20170524	P		UniProtKB	Q15109	AGER	involved_in	GO:0048167	regulation of synaptic plasticity	ECO:0000304	TAS	PMID:20739563		9606	occurs_in(UBERON:0002421),part_of(GO:1904645)|occurs_in(UBERON:0000956),part_of(GO:1904645)	20170516	P
ComplexPortal	CPX-3187	amy3-receptor_human	involved_in	GO:0010628	positive regulation of gene expression	ECO:0000316	IGI	PMID:22500019	ComplexPortal:CPX-1134	9606	regulates_expression_of(ENSEMBL:ENSG00000170345)	20170628	P		UniProtKB	Q15109	AGER	involved_in	GO:1904645	response to amyloid-beta	ECO:0000304	TAS	PMID:20739563		9606	occurs_in(UBERON:0002421)|occurs_in(UBERON:0000956)	20170516	P
ComplexPortal	CPX-3187	amy3-receptor_human	involved_in	GO:0010739	positive regulation of protein kinase A signaling	ECO:0000316	IGI	PMID:22500019	ComplexPortal:CPX-1134	9606	has_regulation_target(UniProtKB:P13861)	20170628	P		UniProtKB	Q15109	AGER	involved_in	GO:0046330	positive regulation of JNK cascade	ECO:0000316	IGI	PMID:20739563	ComplexPortal:CPX-1134,UniProtKB:P10749	9606	occurs_in(UBERON:0002728),regulates(GO:0060292)	20170628	P
ComplexPortal	CPX-3187	amy3-receptor_human	involved_in	GO:0010942	positive regulation of cell death	ECO:0000316	IGI	PMID:22500019	ComplexPortal:CPX-1134	9606		20170628	P		UniProtKB	Q15109	AGER	involved_in	GO:1900453	negative regulation of long term synaptic depression	ECO:0000316	IGI	PMID:20739563	ComplexPortal:CPX-1134	9606	occurs_in(UBERON:0002728),occurs_in(CL:0000129)	20170628	P
ComplexPortal	CPX-3187	amy3-receptor_human	involved_in	GO:0033138	positive regulation of peptidyl-serine phosphorylation	ECO:0000316	IGI	PMID:22500019	ComplexPortal:CPX-1134	9606	has_regulation_target(UniProtKB:P13861)	20170628	P		UniProtKB	Q15109	AGER	involved_in	GO:1900745	positive regulation of p38MAPK cascade	ECO:0000316	IGI	PMID:20739563	ComplexPortal:CPX-1134,UniProtKB:P10749	9606	occurs_in(UBERON:0002728),regulates(GO:0060292)	20170628	P
ComplexPortal	CPX-3187	amy3-receptor_human	involved_in	GO:0051897	positive regulation of protein kinase B signaling	ECO:0000316	IGI	PMID:22500019	ComplexPortal:CPX-1134	9606		20170628	P		UniProtKB	Q15109	AGER	part_of	GO:0016324	apical plasma membrane	ECO:0000314	IDA	PMID:26005850		9606	part_of(CL:0002144),part_of(UBERON:0013694)	20170522	C
ComplexPortal	CPX-3187	amy3-receptor_human	involved_in	GO:0070374	positive regulation of ERK1 and ERK2 cascade	ECO:0000316	IGI	PMID:22500019	ComplexPortal:CPX-1134	9606		20170628	P		UniProtKB	Q15109	AGER	part_of	GO:0098794	postsynapse	ECO:0000304	TAS	PMID:26224839		9606		20170329	C
ComplexPortal	CPX-3187	amy3-receptor_human	involved_in	GO:0097647	amylin receptor signaling pathway	ECO:0000316	IGI	PMID:22500019	ComplexPortal:CPX-1134	9606		20170628	P		UniProtKB	P24587	Akap5	enables	GO:0031698	beta-2 adrenergic receptor binding	ECO:0000353	IPI	PMID:20395454	UniProtKB:P10608	10116	occurs_in(UBERON:0000451)	20170525	F
ComplexPortal	CPX-3187	amy3-receptor_human	involved_in	GO:1905665	positive regulation of calcium ion import across plasma membrane	ECO:0000316	IGI	PMID:22500019	ComplexPortal:CPX-1134	9606		20170628	P		UniProtKB	P31749	AKT1	involved_in	GO:0010628	positive regulation of gene expression	ECO:0000250	ISS	PMID:18292230	UniProtKB:P31750	9606	regulates_expression_of(ENSEMBL:ENSG00000103266),regulates_o_occurs_in(UBERON:0000955)	20180201	P
ComplexPortal	CPX-3187	amy3-receptor_human	enables	GO:0001540	amyloid-beta binding	ECO:0000305	IC	PMID:22500019	GO:1904645	9606		20181030	F		UniProtKB	P31749	AKT1	involved_in	GO:0031397	negative regulation of protein ubiquitination	ECO:0000315	IMP	PMID:18292230		9606	has_regulation_target(UniProtKB:Q9UNE7),part_of(GO:0032091)	20180201	P
ComplexPortal	CPX-3187	amy3-receptor_human	enables	GO:0001540	amyloid-beta binding	ECO:0000304	TAS	PMID:26719327		9606		20181030	F		UniProtKB	P31749	AKT1	involved_in	GO:0032091	negative regulation of protein binding	ECO:0000315	IMP	PMID:18292230		9606	has_regulation_target(UniProtKB:Q9UNE7),has_regulation_target(UniProtKB:P10636)	20180201	P
UniProtKB	CPX-3187	amy3-receptor_human	involved_in	GO:1904645	response to amyloid-beta	ECO:0000314	IDA	PMID:22500019		9606		20181030	P		UniProtKB	P31750	Akt1	involved_in	GO:0010628	positive regulation of gene expression	ECO:0000315	IMP	PMID:18292230		10090	regulates_expression_of(ENSEMBL:ENSMUSG00000039615),regulates_o_occurs_in(UBERON:0000955)	20180201	P
UniProtKB	Q12955	ANK3	part_of	GO:0033268	node of Ranvier	ECO:0000250	ISS	GO_REF:0000024	UniProtKB:G5E8K5	9606	part_of(CL:1001451)	20180327	C		UniProtKB	P31749	AKT1	enables	GO:0004674	protein serine/threonine kinase activity	ECO:0000303	NAS	PMID:28386764		9606	has_input(UniProtKB:P10636)	20180122	F
UniProtKB	Q12955	ANK3	part_of	GO:0033268	node of Ranvier	ECO:0000250	ISS	GO_REF:0000024	UniProtKB:O70511	9606	part_of(CL:1001451)	20180327	C		UniProtKB	P31749	AKT1	involved_in	GO:0071901	negative regulation of protein serine/threonine kinase activity	ECO:0000304	TAS	PMID:28386764		9606	has_regulation_target(UniProtKB:P49841)	20180122	P
UniProtKB	Q12955	ANK3	part_of	GO:0043194	axon initial segment	ECO:0000250	ISS	GO_REF:0000024	UniProtKB:O70511	9606	part_of(CL:0002608)	20180327	C		ComplexPortal	CPX-2173	amy1-receptor_human	enables	GO:0097643	amylin receptor activity	ECO:0000316	IGI	PMID:22500019	UniProtKB:P06881|UniProtKB:P10997:PRO_0000004106|UniProtKB:P12969:PRO_0000004122|UniProtKB:P35318	9606		20170524	F
UniProtKB	O95782	AP2A1	part_of	GO:0045334	clathrin-coated endocytic vesicle	ECO:0000303	NAS	PMID:25898166		9606		20170714	C		ComplexPortal	CPX-2173	amy1-receptor_human	involved_in	GO:0097647	amylin receptor signaling pathway	ECO:0000316	IGI	PMID:22500019	UniProtKB:P06881|UniProtKB:P10997:PRO_0000004106|UniProtKB:P12969|UniProtKB:P30988	9606		20170524	P
UniProtKB	O95782	AP2A1	enables	GO:0050750	low-density lipoprotein particle receptor binding	ECO:0000353	IPI	PMID:26005850	UniProtKB:Q07954	9606	activated_by(CHEBI:64646),part_of(GO:1904646),occurs_in(UBERON:0013694)	20170522	F		ComplexPortal	CPX-3186	amy2-receptor_human	enables	GO:0097643	amylin receptor activity	ECO:0000316	IGI	PMID:22500019	UniProtKB:P12969:PRO_0000004122|UniProtKB:P35318	9606		20170524	F
UniProtKB	O94973	AP2A2	part_of	GO:0045334	clathrin-coated endocytic vesicle	ECO:0000303	NAS	PMID:25898166		9606		20170714	C		ComplexPortal	CPX-3186	amy2-receptor_human	involved_in	GO:0097647	amylin receptor signaling pathway	ECO:0000316	IGI	PMID:22500019	UniProtKB:P12969:PRO_0000004122|UniProtKB:P35318	9606		20170524	P
UniProtKB	P63010	AP2B1	part_of	GO:0045334	clathrin-coated endocytic vesicle	ECO:0000303	NAS	PMID:25898166		9606		20170714	C		ComplexPortal	CPX-3187	amy3-receptor_human	enables	GO:0097643	amylin receptor activity	ECO:0000316	IGI	PMID:22500019	UniProtKB:P10997:PRO_0000004106	9606		20170524	F
UniProtKB	Q96CW1	AP2M1	part_of	GO:0045334	clathrin-coated endocytic vesicle	ECO:0000303	NAS	PMID:25898166		9606		20170714	C		ComplexPortal	CPX-3187	amy3-receptor_human	involved_in	GO:0010628	positive regulation of gene expression	ECO:0000316	IGI	PMID:22500019	UniProtKB:P10997:PRO_0000004106	9606	regulates_expression_of(ENSEMBL:ENSG00000170345)	20170524	P
UniProtKB	Q96CW1	AP2M1	involved_in	GO:0031623	receptor internalization	ECO:0000315	IMP	PMID:25898166		9606	has_input(UniProtKB:Q06AH7)|has_input(UniProtKB:P01133)	20170717	P		ComplexPortal	CPX-3187	amy3-receptor_human	involved_in	GO:0010739	positive regulation of protein kinase A signaling	ECO:0000316	IGI	PMID:22500019	UniProtKB:P10997:PRO_0000004106	9606	has_regulation_target(UniProtKB:P13861)	20170524	P
UniProtKB	Q96CW1	AP2M1	involved_in	GO:0097494	regulation of vesicle size	ECO:0000315	IMP	PMID:25898166		9606	regulates_o_occurs_in(GO:0045334)	20170717	P		ComplexPortal	CPX-3187	amy3-receptor_human	involved_in	GO:0010942	positive regulation of cell death	ECO:0000316	IGI	PMID:22500019	UniProtKB:P10997:PRO_0000004106	9606	regulates_expression_of(ENSEMBL:ENSG00000170345)	20170524	P
UniProtKB	P53680	AP2S1	part_of	GO:0045334	clathrin-coated endocytic vesicle	ECO:0000303	NAS	PMID:25898166		9606		20170714	C		ComplexPortal	CPX-3187	amy3-receptor_human	involved_in	GO:0033138	positive regulation of peptidyl-serine phosphorylation	ECO:0000316	IGI	PMID:22500019	UniProtKB:P10997:PRO_0000004106	9606	has_regulation_target(UniProtKB:P13861)	20170524	P
UniProtKB	O00213	APBB1	involved_in	GO:0000122	negative regulation of transcription by RNA polymerase II	ECO:0000316	IGI	PMID:21803450	UniProtKB:P05067:PRO_0000000099	9606	regulates_transcription_of(ENSEMBL:ENSG00000120885)	20170201	P		ComplexPortal	CPX-3187	amy3-receptor_human	involved_in	GO:0051897	positive regulation of protein kinase B signaling	ECO:0000316	IGI	PMID:22500019	UniProtKB:P10997:PRO_0000004106	9606		20170524	P
UniProtKB	P02647	APOA1	enables	GO:0001540	amyloid-beta binding	ECO:0000353	IPI	PMID:9211985	UniProtKB:P05067:PRO_0000000093	9606	occurs_in(GO:0034364)	20170425	F		ComplexPortal	CPX-3187	amy3-receptor_human	involved_in	GO:0070374	positive regulation of ERK1 and ERK2 cascade	ECO:0000316	IGI	PMID:22500019	UniProtKB:P10997:PRO_0000004106	9606		20170524	P
UniProtKB	P02647	APOA1	part_of	GO:0034364	high-density lipoprotein particle	ECO:0000314	IDA	PMID:9211985		9606		20170425	C		ComplexPortal	CPX-3187	amy3-receptor_human	involved_in	GO:0097647	amylin receptor signaling pathway	ECO:0000316	IGI	PMID:22500019	UniProtKB:P10997:PRO_0000004106	9606		20170524	P
UniProtKB	P02649	APOE	involved_in	GO:0010976	positive regulation of neuron projection development	ECO:0000250	ISS	GO_REF:0000024	UniProtKB:P08226	9606	occurs_in(UBERON:0001997)	20170126	P		ComplexPortal	CPX-3187	amy3-receptor_human	involved_in	GO:1905665	positive regulation of calcium ion import across plasma membrane	ECO:0000316	IGI	PMID:22500019	UniProtKB:P10997:PRO_0000004106	9606		20170524	P
UniProtKB	P02649	APOE	part_of	GO:0005615	extracellular space	ECO:0000250	ISS	GO_REF:0000024	UniProtKB:P08226	9606	part_of(UBERON:0000955)	20170601	C		ComplexPortal	CPX-3187	amy3-receptor_human	involved_in	GO:0010628	positive regulation of gene expression	ECO:0000316	IGI	PMID:22500019	ComplexPortal:CPX-1134	9606	regulates_expression_of(ENSEMBL:ENSG00000170345)	20170628	P
UniProtKB	P02649	APOE	part_of	GO:0005615	extracellular space	ECO:0000250	ISS	GO_REF:0000024	UniProtKB:P08226	9606	part_of(UBERON:0000955),part_of(UBERON:0000913)	20170710	C		ComplexPortal	CPX-3187	amy3-receptor_human	involved_in	GO:0010739	positive regulation of protein kinase A signaling	ECO:0000316	IGI	PMID:22500019	ComplexPortal:CPX-1134	9606	has_regulation_target(UniProtKB:P13861)	20170628	P
UniProtKB	P02649	APOE	involved_in	GO:0010629	negative regulation of gene expression	ECO:0000250	ISS	GO_REF:0000024	UniProtKB:P08226	9606	regulates_expression_of(ENSEMBL:ENSG00000100600),occurs_in(UBERON:0001637),regulates_o_occurs_in(UBERON:0001637)	20180306	P		ComplexPortal	CPX-3187	amy3-receptor_human	involved_in	GO:0010942	positive regulation of cell death	ECO:0000316	IGI	PMID:22500019	ComplexPortal:CPX-1134	9606		20170628	P
UniProtKB	P02649	APOE	involved_in	GO:1900272	negative regulation of long-term synaptic potentiation	ECO:0000314	IDA	PMID:16273551		9606	occurs_in(UBERON:0001885)	20170126	P		ComplexPortal	CPX-3187	amy3-receptor_human	involved_in	GO:0033138	positive regulation of peptidyl-serine phosphorylation	ECO:0000316	IGI	PMID:22500019	ComplexPortal:CPX-1134	9606	has_regulation_target(UniProtKB:P13861)	20170628	P
UniProtKB	P02649	APOE	involved_in	GO:0032269	negative regulation of cellular protein metabolic process	ECO:0000316	IGI	PMID:16805831	UniProtKB:O00755	9606	has_regulation_target(UniProtKB:Q9WU82),regulates_o_occurs_in(GO:0005634)	20170125	P		ComplexPortal	CPX-3187	amy3-receptor_human	involved_in	GO:0051897	positive regulation of protein kinase B signaling	ECO:0000316	IGI	PMID:22500019	ComplexPortal:CPX-1134	9606		20170628	P
UniProtKB	P02649	APOE	involved_in	GO:0090090	negative regulation of canonical Wnt signaling pathway	ECO:0000314	IDA	PMID:16805831		9606		20170125	P		ComplexPortal	CPX-3187	amy3-receptor_human	involved_in	GO:0070374	positive regulation of ERK1 and ERK2 cascade	ECO:0000316	IGI	PMID:22500019	ComplexPortal:CPX-1134	9606		20170628	P
UniProtKB	P02649	APOE	involved_in	GO:0090090	negative regulation of canonical Wnt signaling pathway	ECO:0000316	IGI	PMID:16805831	UniProtKB:O00755	9606	has_agent(GO:0034361)	20170125	P		ComplexPortal	CPX-3187	amy3-receptor_human	involved_in	GO:0097647	amylin receptor signaling pathway	ECO:0000316	IGI	PMID:22500019	ComplexPortal:CPX-1134	9606		20170628	P
UniProtKB	P02649	APOE	involved_in	GO:0090090	negative regulation of canonical Wnt signaling pathway	ECO:0000316	IGI	PMID:16805831	UniProtKB:O00755	9606	occurs_in(GO:0005576)	20170125	P		ComplexPortal	CPX-3187	amy3-receptor_human	involved_in	GO:1905665	positive regulation of calcium ion import across plasma membrane	ECO:0000316	IGI	PMID:22500019	ComplexPortal:CPX-1134	9606		20170628	P
UniProtKB	P02649	APOE	involved_in	GO:0090090	negative regulation of canonical Wnt signaling pathway	ECO:0000316	IGI	PMID:16805831	UniProtKB:O00755|UniProtKB:O00755,UniProtKB:O54908|UniProtKB:O00755,UniProtKB:O75197|UniProtKB:O00755,UniProtKB:O75581	9606		20170125	P		ComplexPortal	CPX-3187	amy3-receptor_human	enables	GO:0001540	amyloid-beta binding	ECO:0000305	IC	PMID:22500019	GO:1904645	9606		20181030	F
UniProtKB	P02649	APOE	part_of	GO:0005576	extracellular region	ECO:0000314	IDA	PMID:16805831		9606		20170125	C		UniProtKB	CPX-3187	amy3-receptor_human	involved_in	GO:1904645	response to amyloid-beta	ECO:0000314	IDA	PMID:22500019		9606		20181030	P
UniProtKB	P02649	APOE	enables	GO:0050750	low-density lipoprotein particle receptor binding	ECO:0000303	NAS	PMID:20005821		9606		20170601	F		ComplexPortal	CPX-3187	amy3-receptor_human	enables	GO:0001540	amyloid-beta binding	ECO:0000304	TAS	PMID:26719327		9606		20181030	F
UniProtKB	P02649	APOE	involved_in	GO:1905908	positive regulation of amyloid fibril formation	ECO:0000304	TAS	PMID:20005821		9606		20170601	P		UniProtKB	G5E8K5	Ank3	part_of	GO:0033268	node of Ranvier	ECO:0000314	IDA	PMID:28426968		10090	part_of(CL:1001451)	20180316	C
UniProtKB	P02649	APOE	enables	GO:0001540	amyloid-beta binding	ECO:0000353	IPI	PMID:22138302	UniProtKB:P05067:PRO_0000000092|UniProtKB:P05067:PRO_0000000093	9606	occurs_in(UBERON:0001359)	20170502	F		UniProtKB	O70511	Ank3	part_of	GO:0033268	node of Ranvier	ECO:0000314	IDA	PMID:28426968		10116	part_of(CL:1001451)	20180316	C
UniProtKB	P02649	APOE	enables	GO:0005198	structural molecule activity	ECO:0000304	TAS	PMID:22138302		9606	has_input(GO:1990777)	20170502	F		UniProtKB	O70511	Ank3	part_of	GO:0043194	axon initial segment	ECO:0000314	IDA	PMID:28426968		10116	part_of(CL:0002608)	20180316	C
UniProtKB	P02649	APOE	enables	GO:0046983	protein dimerization activity	ECO:0000314	IDA	PMID:22138302		9606		20170502	F		UniProtKB	O95782	AP2A1	part_of	GO:0045334	clathrin-coated endocytic vesicle	ECO:0000303	NAS	PMID:25898166		9606		20170714	C
UniProtKB	P02649	APOE	involved_in	GO:0006898	receptor-mediated endocytosis	ECO:0000304	TAS	PMID:22138302		9606	has_input(GO:1990777)	20170502	P		UniProtKB	O95782	AP2A1	enables	GO:0050750	low-density lipoprotein particle receptor binding	ECO:0000353	IPI	PMID:26005850	UniProtKB:Q07954	9606	activated_by(CHEBI:64646),part_of(GO:1904646),occurs_in(UBERON:0013694)	20170522	F
UniProtKB	P02649	APOE	part_of	GO:0034361	very-low-density lipoprotein particle	ECO:0000314	IDA	PMID:22138302		9606		20170502	C		UniProtKB	O94973	AP2A2	part_of	GO:0045334	clathrin-coated endocytic vesicle	ECO:0000303	NAS	PMID:25898166		9606		20170714	C
UniProtKB	P02649	APOE	part_of	GO:0034362	low-density lipoprotein particle	ECO:0000314	IDA	PMID:22138302		9606		20170502	C		UniProtKB	P63010	AP2B1	part_of	GO:0045334	clathrin-coated endocytic vesicle	ECO:0000303	NAS	PMID:25898166		9606		20170714	C
UniProtKB	P02649	APOE	part_of	GO:0034363	intermediate-density lipoprotein particle	ECO:0000314	IDA	PMID:22138302		9606		20170502	C		UniProtKB	Q96CW1	AP2M1	part_of	GO:0045334	clathrin-coated endocytic vesicle	ECO:0000303	NAS	PMID:25898166		9606		20170714	C
UniProtKB	P02649	APOE	part_of	GO:0034364	high-density lipoprotein particle	ECO:0000314	IDA	PMID:22138302		9606		20170502	C		UniProtKB	Q96CW1	AP2M1	involved_in	GO:0031623	receptor internalization	ECO:0000315	IMP	PMID:25898166		9606	has_input(UniProtKB:Q06AH7)|has_input(UniProtKB:P01133)	20170717	P
UniProtKB	P02649	APOE	part_of	GO:1990777	lipoprotein particle	ECO:0000314	IDA	PMID:22138302		9606	part_of(UBERON:0001359)	20170502	C		UniProtKB	Q96CW1	AP2M1	involved_in	GO:0097494	regulation of vesicle size	ECO:0000315	IMP	PMID:25898166		9606	regulates_o_occurs_in(GO:0045334)	20170717	P
UniProtKB	P02649	APOE	part_of	GO:0034365	discoidal high-density lipoprotein particle	ECO:0000304	TAS	PMID:22383525		9606	produced_by(CL:0000127)	20170602	C		UniProtKB	P53680	AP2S1	part_of	GO:0045334	clathrin-coated endocytic vesicle	ECO:0000303	NAS	PMID:25898166		9606		20170714	C
UniProtKB	P02649	APOE	involved_in	GO:0010976	positive regulation of neuron projection development	ECO:0000314	IDA	PMID:23845000		9606	occurs_in(UBERON:0001997)	20170126	P		UniProtKB	O00213	APBB1	involved_in	GO:0000122	negative regulation of transcription by RNA polymerase II	ECO:0000316	IGI	PMID:21803450	UniProtKB:P05067:PRO_0000000099	9606	regulates_transcription_of(ENSEMBL:ENSG00000120885)	20170201	P
UniProtKB	P02649	APOE	involved_in	GO:0007616	long-term memory	ECO:0000316	IGI	PMID:24412220	UniProtKB:P01130|UniProtKB:P35951	9606		20170704	P		UniProtKB	P02647	APOA1	enables	GO:0001540	amyloid-beta binding	ECO:0000353	IPI	PMID:9211985	UniProtKB:P05067:PRO_0000000093	9606	occurs_in(GO:0034364)	20170425	F
UniProtKB	P02649	APOE	involved_in	GO:0035641	locomotory exploration behavior	ECO:0000315	IMP	PMID:24412220		9606		20170704	P		UniProtKB	P02647	APOA1	part_of	GO:0034364	high-density lipoprotein particle	ECO:0000314	IDA	PMID:9211985		9606		20170425	C
UniProtKB	P02649	APOE	involved_in	GO:0042632	cholesterol homeostasis	ECO:0000316	IGI	PMID:24412220	UniProtKB:P01130	9606	regulates_o_occurs_in(UBERON:0001969),part_of(GO:0061771)	20170704	P		UniProtKB	P09809	APOA1	enables	GO:0001540	amyloid-beta binding	ECO:0000353	IPI	PMID:9211985	UniProtKB:P05067:PRO_0000000093	9986	occurs_in(GO:0034364)	20170425	F
UniProtKB	P02649	APOE	involved_in	GO:0051246	regulation of protein metabolic process	ECO:0000316	IGI	PMID:24412220	UniProtKB:P01130|UniProtKB:P35951	9606	has_regulation_target(UniProtKB:P02649),regulates_o_occurs_in(UBERON:0001969)|has_regulation_target(UniProtKB:P02649),regulates_o_occurs_in(UBERON:0000956)|has_regulation_target(UniProtKB:P02649),regulates_o_occurs_in(UBERON:0001876)|has_regulation_target(UniProtKB:P02649),regulates_o_occurs_in(UBERON:0002421)|has_regulation_target(UniProtKB:P02649),regulates_o_occurs_in(UBERON:0002037)	20170704	P		UniProtKB	P09809	APOA1	enables	GO:0042277	peptide binding	ECO:0000353	IPI	PMID:9211985	UniProtKB:P05067:PRO_0000000093	9986	occurs_in(GO:0034364)	20170425	F
UniProtKB	P02649	APOE	involved_in	GO:0061771	response to caloric restriction	ECO:0000316	IGI	PMID:24412220	UniProtKB:P01130	9606		20170704	P		UniProtKB	P04639	Apoa1	enables	GO:0001540	amyloid-beta binding	ECO:0000353	IPI	PMID:9211985	UniProtKB:P05067:PRO_0000000093	10116		20170425	F
UniProtKB	P02649	APOE	involved_in	GO:0061771	response to caloric restriction	ECO:0000316	IGI	PMID:24412220	UniProtKB:P35951	9606		20170704	P		UniProtKB	P04639	Apoa1	part_of	GO:0034362	low-density lipoprotein particle	ECO:0000314	IDA	PMID:9211985		10116		20170425	C
UniProtKB	P02649	APOE	involved_in	GO:0090181	regulation of cholesterol metabolic process	ECO:0000316	IGI	PMID:24412220	UniProtKB:P35951	9606	regulates_o_occurs_in(UBERON:0001969),part_of(GO:0061771)	20170704	P		UniProtKB	P04639	Apoa1	part_of	GO:0034363	intermediate-density lipoprotein particle	ECO:0000314	IDA	PMID:9211985		10116		20170425	C
UniProtKB	P02649	APOE	involved_in	GO:2000822	regulation of behavioral fear response	ECO:0000315	IMP	PMID:24412220		9606	regulates_o_occurs_in(UBERON:0001876)	20170704	P		UniProtKB	P04639	Apoa1	part_of	GO:0034364	high-density lipoprotein particle	ECO:0000314	IDA	PMID:9211985		10116		20170425	C
UniProtKB	P02649	APOE	involved_in	GO:0051044	positive regulation of membrane protein ectodomain proteolysis	ECO:0000316	IGI	PMID:25015123	UniProtKB:P05067:PRO_0000000092	9606	has_regulation_target(UniProtKB:P01130),regulates_o_occurs_in(CL:2000044)|has_regulation_target(UniProtKB:Q07954),regulates_o_occurs_in(CL:2000044)	20170704	P		UniProtKB	P02649	APOE	involved_in	GO:1900272	negative regulation of long-term synaptic potentiation	ECO:0000314	IDA	PMID:16273551		9606	occurs_in(UBERON:0001885)	20170126	P
UniProtKB	P02649	APOE	enables	GO:0001540	amyloid-beta binding	ECO:0000314	IDA	PMID:25207746		9606	has_direct_input(UniProtKB:P05067:PRO_0000000092)	20170508	F		UniProtKB	P02649	APOE	involved_in	GO:0032269	negative regulation of cellular protein metabolic process	ECO:0000316	IGI	PMID:16805831	UniProtKB:O00755	9606	has_regulation_target(UniProtKB:Q9WU82),regulates_o_occurs_in(GO:0005634)	20170125	P
UniProtKB	P02649	APOE	involved_in	GO:0032462	regulation of protein homooligomerization	ECO:0000314	IDA	PMID:25207746		9606	has_regulation_target(UniProtKB:P05067:PRO_0000000093)|has_regulation_target(UniProtKB:P05067:PRO_0000000092)	20170508	P		UniProtKB	P02649	APOE	involved_in	GO:0090090	negative regulation of canonical Wnt signaling pathway	ECO:0000314	IDA	PMID:16805831		9606		20170125	P
UniProtKB	P02649	APOE	involved_in	GO:1905906	regulation of amyloid fibril formation	ECO:0000314	IDA	PMID:25207746		9606	has_regulation_target(UniProtKB:P05067:PRO_0000000093)	20170508	P		UniProtKB	P02649	APOE	involved_in	GO:0090090	negative regulation of canonical Wnt signaling pathway	ECO:0000316	IGI	PMID:16805831	UniProtKB:O00755	9606	has_agent(GO:0034361)	20170125	P
UniProtKB	P02649	APOE	enables	GO:0044877	protein-containing complex binding	ECO:0000314	IDA	PMID:25207746		9606	has_direct_input(ComplexPortal:CPX-1134)	20180502	F		UniProtKB	P02649	APOE	involved_in	GO:0090090	negative regulation of canonical Wnt signaling pathway	ECO:0000316	IGI	PMID:16805831	UniProtKB:O00755	9606	occurs_in(GO:0005576)	20170125	P
UniProtKB	P02649	APOE	involved_in	GO:0010976	positive regulation of neuron projection development	ECO:0000314	IDA	PMID:7592957		9606	part_of(GO:1905890)	20170201	P		UniProtKB	P02649	APOE	involved_in	GO:0090090	negative regulation of canonical Wnt signaling pathway	ECO:0000316	IGI	PMID:16805831	UniProtKB:O00755|UniProtKB:O00755,UniProtKB:O54908|UniProtKB:O00755,UniProtKB:O75197|UniProtKB:O00755,UniProtKB:O75581	9606		20170125	P
UniProtKB	P02649	APOE	involved_in	GO:0010977	negative regulation of neuron projection development	ECO:0000314	IDA	PMID:7592957		9606	part_of(GO:1905890)	20170201	P		UniProtKB	P02649	APOE	part_of	GO:0005576	extracellular region	ECO:0000314	IDA	PMID:16805831		9606		20170125	C
UniProtKB	P02649	APOE	involved_in	GO:1905890	regulation of cellular response to very-low-density lipoprotein particle stimulus	ECO:0000314	IDA	PMID:7592957		9606		20170201	P		UniProtKB	P08226	Apoe	involved_in	GO:0010629	negative regulation of gene expression	ECO:0000315	IMP	PMID:18377911		10090	regulates_expression_of(ENSEMBL:ENSMUSG00000021190),occurs_in(UBERON:0001637),regulates_o_occurs_in(UBERON:0001637)	20180306	P
UniProtKB	P02649	APOE	involved_in	GO:0045807	positive regulation of endocytosis	ECO:0000314	IDA	PMID:7683668		9606	has_regulation_target(GO:0034361)	20170123	P		UniProtKB	P02649	APOE	enables	GO:0050750	low-density lipoprotein particle receptor binding	ECO:0000303	NAS	PMID:20005821		9606		20170601	F
UniProtKB	P02649	APOE	involved_in	GO:1905855	positive regulation of heparan sulfate binding	ECO:0000314	IDA	PMID:7683668		9606	has_regulation_target(GO:0034360),regulates_o_occurs_in(GO:0031240)	20170130	P		UniProtKB	P02649	APOE	involved_in	GO:1905908	positive regulation of amyloid fibril formation	ECO:0000304	TAS	PMID:20005821		9606		20170601	P
UniProtKB	P02649	APOE	involved_in	GO:1905855	positive regulation of heparan sulfate binding	ECO:0000314	IDA	PMID:7683668		9606	has_regulation_target(GO:0034361),regulates_o_occurs_in(GO:0031240)	20170130	P		UniProtKB	P08226	Apoe	part_of	GO:0005615	extracellular space	ECO:0000314	IDA	PMID:20005821		10090	part_of(UBERON:0000955)	20170601	C
UniProtKB	P02649	APOE	enables	GO:0001540	amyloid-beta binding	ECO:0000314	IDA	PMID:8089103		9606	has_input(CHEBI:64646)	20170119	F		UniProtKB	P02649	APOE	enables	GO:0001540	amyloid-beta binding	ECO:0000353	IPI	PMID:22138302	UniProtKB:P05067:PRO_0000000092|UniProtKB:P05067:PRO_0000000093	9606	occurs_in(UBERON:0001359)	20170502	F
UniProtKB	P02649	APOE	enables	GO:0042803	protein homodimerization activity	ECO:0000314	IDA	PMID:8089103		9606		20170119	F		UniProtKB	P02649	APOE	enables	GO:0005198	structural molecule activity	ECO:0000304	TAS	PMID:22138302		9606	has_input(GO:1990777)	20170502	F
UniProtKB	P02649	APOE	part_of	GO:0005576	extracellular region	ECO:0000314	IDA	PMID:8089103		9606		20170119	C		UniProtKB	P02649	APOE	enables	GO:0046983	protein dimerization activity	ECO:0000314	IDA	PMID:22138302		9606		20170502	F
UniProtKB	P02649	APOE	involved_in	GO:0045807	positive regulation of endocytosis	ECO:0000314	IDA	PMID:8300609		9606	has_regulation_target(GO:0034361)	20170123	P		UniProtKB	P02649	APOE	involved_in	GO:0006898	receptor-mediated endocytosis	ECO:0000304	TAS	PMID:22138302		9606	has_input(GO:1990777)	20170502	P
UniProtKB	P02649	APOE	involved_in	GO:1905860	positive regulation of heparan sulfate proteoglycan binding	ECO:0000314	IDA	PMID:8300609		9606	has_regulation_target(GO:0034361)	20170123	P		UniProtKB	P02649	APOE	part_of	GO:0034361	very-low-density lipoprotein particle	ECO:0000314	IDA	PMID:22138302		9606		20170502	C
UniProtKB	P02649	APOE	enables	GO:0001540	amyloid-beta binding	ECO:0000353	IPI	PMID:9003062	CHEBI:64645	9606		20170123	F		UniProtKB	P02649	APOE	part_of	GO:0034362	low-density lipoprotein particle	ECO:0000314	IDA	PMID:22138302		9606		20170502	C
UniProtKB	P02649	APOE	part_of	GO:0034361	very-low-density lipoprotein particle	ECO:0000314	IDA	PMID:9211985		9606		20170124	C		UniProtKB	P02649	APOE	part_of	GO:0034363	intermediate-density lipoprotein particle	ECO:0000314	IDA	PMID:22138302		9606		20170502	C
UniProtKB	P02649	APOE	part_of	GO:0034362	low-density lipoprotein particle	ECO:0000314	IDA	PMID:9211985		9606		20170124	C		UniProtKB	P02649	APOE	part_of	GO:0034364	high-density lipoprotein particle	ECO:0000314	IDA	PMID:22138302		9606		20170502	C
UniProtKB	P02649	APOE	part_of	GO:0034363	intermediate-density lipoprotein particle	ECO:0000314	IDA	PMID:9211985		9606		20170124	C		UniProtKB	P02649	APOE	part_of	GO:1990777	lipoprotein particle	ECO:0000314	IDA	PMID:22138302		9606	part_of(UBERON:0001359)	20170502	C
UniProtKB	P02649	APOE	part_of	GO:0034364	high-density lipoprotein particle	ECO:0000314	IDA	PMID:9211985		9606		20170124	C		UniProtKB	P02649	APOE	part_of	GO:0034365	discoidal high-density lipoprotein particle	ECO:0000304	TAS	PMID:22383525		9606	produced_by(CL:0000127)	20170602	C
UniProtKB	P02649	APOE	enables	GO:0001540	amyloid-beta binding	ECO:0000353	IPI	PMID:9211985	UniProtKB:P05067:PRO_0000000093	9606	occurs_in(GO:0034362)|occurs_in(GO:0034363)|occurs_in(GO:0034361)	20170425	F		UniProtKB	P08226	Apoe	part_of	GO:0005615	extracellular space	ECO:0000314	IDA	PMID:23640054		10090	part_of(UBERON:0000955),part_of(UBERON:0000913)	20170710	C
UniProtKB	P02649	APOE	enables	GO:0042803	protein homodimerization activity	ECO:0000314	IDA	PMID:9211985		9606	occurs_in(GO:0034364)|occurs_in(GO:0034362)|occurs_in(GO:0034363)|occurs_in(GO:0034361)	20170425	F		UniProtKB	P02649	APOE	involved_in	GO:0010976	positive regulation of neuron projection development	ECO:0000314	IDA	PMID:23845000		9606	occurs_in(UBERON:0001997)	20170126	P
UniProtKB	P02649	APOE	involved_in	GO:1905908	positive regulation of amyloid fibril formation	ECO:0000304	TAS	PMID:9228033		9606		20170502	P		UniProtKB	P08226	Apoe	involved_in	GO:0010976	positive regulation of neuron projection development	ECO:0000315	IMP	PMID:23845000		10090	occurs_in(UBERON:0001997)	20170126	P
UniProtKB	P05067	APP	involved_in	GO:0051247	positive regulation of protein metabolic process	ECO:0000250	ISS	GO_REF:0000024	UniProtKB:P08592	9606	occurs_in(UBERON:0002421),has_regulation_target(UniProtKB:P36544)	20170210	P		UniProtKB	P02649	APOE	involved_in	GO:0007616	long-term memory	ECO:0000316	IGI	PMID:24412220	UniProtKB:P01130|UniProtKB:P35951	9606		20170704	P
UniProtKB	P05067	APP	involved_in	GO:0007612	learning	ECO:0000315	IMP	PMID:11140684		9606	part_of(GO:0090647)	20170710	P		UniProtKB	P02649	APOE	involved_in	GO:0035641	locomotory exploration behavior	ECO:0000315	IMP	PMID:24412220		9606		20170704	P
UniProtKB	P05067	APP	involved_in	GO:0090647	modulation of age-related behavioral decline	ECO:0000315	IMP	PMID:11140684		9606		20170710	P		UniProtKB	P02649	APOE	involved_in	GO:0042632	cholesterol homeostasis	ECO:0000316	IGI	PMID:24412220	UniProtKB:P01130	9606	regulates_o_occurs_in(UBERON:0001969),part_of(GO:0061771)	20170704	P
UniProtKB	P05067	APP	involved_in	GO:0001934	positive regulation of protein phosphorylation	ECO:0000314	IDA	PMID:11404397		9606	occurs_in(UBERON:0001885),has_regulation_target(UniProtKB:P16220)|occurs_in(UBERON:0003881),has_regulation_target(UniProtKB:P16220),happens_during(UBERON:0018241)	20170210	P		UniProtKB	P02649	APOE	involved_in	GO:0051246	regulation of protein metabolic process	ECO:0000316	IGI	PMID:24412220	UniProtKB:P01130|UniProtKB:P35951	9606	has_regulation_target(UniProtKB:P02649),regulates_o_occurs_in(UBERON:0001969)|has_regulation_target(UniProtKB:P02649),regulates_o_occurs_in(UBERON:0000956)|has_regulation_target(UniProtKB:P02649),regulates_o_occurs_in(UBERON:0001876)|has_regulation_target(UniProtKB:P02649),regulates_o_occurs_in(UBERON:0002421)|has_regulation_target(UniProtKB:P02649),regulates_o_occurs_in(UBERON:0002037)	20170704	P
UniProtKB	P05067	APP	involved_in	GO:0001934	positive regulation of protein phosphorylation	ECO:0000314	IDA	PMID:11404397		9606	occurs_in(UBERON:0001885),has_regulation_target(UniProtKB:P28482),happens_during(UBERON:0018241)|occurs_in(UBERON:0003881),has_regulation_target(UniProtKB:P28482),happens_during(UBERON:0018241)	20170210	P		UniProtKB	P02649	APOE	involved_in	GO:0061771	response to caloric restriction	ECO:0000316	IGI	PMID:24412220	UniProtKB:P01130	9606		20170704	P
UniProtKB	P05067	APP	involved_in	GO:0051247	positive regulation of protein metabolic process	ECO:0000315	IMP	PMID:11404397		9606	occurs_in(UBERON:0001885),has_regulation_target(UniProtKB:P36544),happens_during(GO:0007568)|occurs_in(UBERON:0003881),has_regulation_target(UniProtKB:P36544),happens_during(GO:0007568)	20170210	P		UniProtKB	P02649	APOE	involved_in	GO:0061771	response to caloric restriction	ECO:0000316	IGI	PMID:24412220	UniProtKB:P35951	9606		20170704	P
UniProtKB	P05067	APP	involved_in	GO:0007611	learning or memory	ECO:0000315	IMP	PMID:11880515		9606	part_of(GO:0090647)	20170710	P		UniProtKB	P02649	APOE	involved_in	GO:0090181	regulation of cholesterol metabolic process	ECO:0000316	IGI	PMID:24412220	UniProtKB:P35951	9606	regulates_o_occurs_in(UBERON:0001969),part_of(GO:0061771)	20170704	P
UniProtKB	P05067	APP	involved_in	GO:0090647	modulation of age-related behavioral decline	ECO:0000315	IMP	PMID:11880515		9606		20170710	P		UniProtKB	P02649	APOE	involved_in	GO:2000822	regulation of behavioral fear response	ECO:0000315	IMP	PMID:24412220		9606	regulates_o_occurs_in(UBERON:0001876)	20170704	P
UniProtKB	P05067	APP	involved_in	GO:0001934	positive regulation of protein phosphorylation	ECO:0000316	IGI	PMID:15457210	UniProtKB:Q15109	9606	happens_during(UBERON:0007222),positively_regulates(GO:0004683),occurs_in(UBERON:0002421),regulates_o_occurs_in(UBERON:0002421)	20170928	P		UniProtKB	P02649	APOE	involved_in	GO:0051044	positive regulation of membrane protein ectodomain proteolysis	ECO:0000316	IGI	PMID:25015123	UniProtKB:P05067:PRO_0000000092	9606	has_regulation_target(UniProtKB:P01130),regulates_o_occurs_in(CL:2000044)|has_regulation_target(UniProtKB:Q07954),regulates_o_occurs_in(CL:2000044)	20170704	P
UniProtKB	P05067	APP	involved_in	GO:0001934	positive regulation of protein phosphorylation	ECO:0000316	IGI	PMID:15457210	UniProtKB:Q15109	9606	has_regulation_target(UniProtKB:Q16539),happens_during(UBERON:0018241)	20170928	P		UniProtKB	P02649	APOE	enables	GO:0001540	amyloid-beta binding	ECO:0000314	IDA	PMID:25207746		9606	has_direct_input(UniProtKB:P05067:PRO_0000000092)	20170508	F
UniProtKB	P05067	APP	involved_in	GO:0001934	positive regulation of protein phosphorylation	ECO:0000316	IGI	PMID:15457210	UniProtKB:Q15109	9606	part_of(GO:0032793),happens_during(UBERON:0018241)	20170928	P		UniProtKB	P02649	APOE	involved_in	GO:0032462	regulation of protein homooligomerization	ECO:0000314	IDA	PMID:25207746		9606	has_regulation_target(UniProtKB:P05067:PRO_0000000093)|has_regulation_target(UniProtKB:P05067:PRO_0000000092)	20170508	P
UniProtKB	P05067	APP	involved_in	GO:0007611	learning or memory	ECO:0000315	IMP	PMID:15457210		9606	happens_during(UBERON:0018241)	20170928	P		UniProtKB	P02649	APOE	involved_in	GO:1905906	regulation of amyloid fibril formation	ECO:0000314	IDA	PMID:25207746		9606	has_regulation_target(UniProtKB:P05067:PRO_0000000093)	20170508	P
UniProtKB	P05067	APP	involved_in	GO:0007611	learning or memory	ECO:0000316	IGI	PMID:15457210	UniProtKB:Q15109	9606	happens_during(UBERON:0018241)	20170928	P		UniProtKB	P02649	APOE	enables	GO:0044877	protein-containing complex binding	ECO:0000314	IDA	PMID:25207746		9606	has_direct_input(ComplexPortal:CPX-1134)	20180502	F
UniProtKB	P05067	APP	involved_in	GO:0010628	positive regulation of gene expression	ECO:0000315	IMP	PMID:15457210		9606	regulates_expression_of(ENSEMBL:ENSG00000204305),regulates_o_occurs_in(UBERON:0000956),occurs_in(UBERON:0000956),regulates_o_occurs_in(UBERON:6003624)	20170928	P		UniProtKB	P02649	APOE	involved_in	GO:0010976	positive regulation of neuron projection development	ECO:0000314	IDA	PMID:7592957		9606	part_of(GO:1905890)	20170201	P
UniProtKB	P05067	APP	involved_in	GO:0051092	positive regulation of NF-kappaB transcription factor activity	ECO:0000316	IGI	PMID:15457210	UniProtKB:Q15109	9606	regulates_o_occurs_in(UBERON:0000956),occurs_in(UBERON:0000956),regulates_o_occurs_in(GO:0005634),regulates_o_occurs_in(UBERON:6003624)	20170928	P		UniProtKB	P02649	APOE	involved_in	GO:0010977	negative regulation of neuron projection development	ECO:0000314	IDA	PMID:7592957		9606	part_of(GO:1905890)	20170201	P
UniProtKB	P05067	APP	involved_in	GO:0061890	positive regulation of astrocyte activation	ECO:0000316	IGI	PMID:15457210	UniProtKB:Q15109	9606	regulates_o_occurs_in(UBERON:0000956),occurs_in(UBERON:0000956),happens_during(UBERON:0007222)|regulates_o_occurs_in(UBERON:0002421),occurs_in(UBERON:0002421),happens_during(UBERON:0007222)	20170928	P		UniProtKB	P02649	APOE	involved_in	GO:1905890	regulation of cellular response to very-low-density lipoprotein particle stimulus	ECO:0000314	IDA	PMID:7592957		9606		20170201	P
UniProtKB	P05067	APP	involved_in	GO:0070374	positive regulation of ERK1 and ERK2 cascade	ECO:0000316	IGI	PMID:15457210	UniProtKB:Q15109	9606	happens_during(UBERON:0018241)	20170928	P		UniProtKB	P02649	APOE	involved_in	GO:0045807	positive regulation of endocytosis	ECO:0000314	IDA	PMID:7683668		9606	has_regulation_target(GO:0034361)	20170123	P
UniProtKB	P05067	APP	involved_in	GO:0090647	modulation of age-related behavioral decline	ECO:0000315	IMP	PMID:15457210		9606		20170928	P		UniProtKB	P02649	APOE	involved_in	GO:1905855	positive regulation of heparan sulfate binding	ECO:0000314	IDA	PMID:7683668		9606	has_regulation_target(GO:0034360),regulates_o_occurs_in(GO:0031240)	20170130	P
UniProtKB	P05067	APP	involved_in	GO:0090647	modulation of age-related behavioral decline	ECO:0000316	IGI	PMID:15457210	UniProtKB:Q15109	9606		20170928	P		UniProtKB	P02649	APOE	involved_in	GO:1905855	positive regulation of heparan sulfate binding	ECO:0000314	IDA	PMID:7683668		9606	has_regulation_target(GO:0034361),regulates_o_occurs_in(GO:0031240)	20170130	P
UniProtKB	P05067	APP	involved_in	GO:1900272	negative regulation of long-term synaptic potentiation	ECO:0000316	IGI	PMID:15457210	UniProtKB:Q15109	9606	occurs_in(UBERON:6003624),regulates_o_occurs_in(UBERON:0014554),happens_during(GO:0007568)	20170928	P		UniProtKB	P02649	APOE	enables	GO:0001540	amyloid-beta binding	ECO:0000314	IDA	PMID:8089103		9606	has_input(CHEBI:64646)	20170119	F
UniProtKB	P05067	APP	involved_in	GO:1901224	positive regulation of NIK/NF-kappaB signaling	ECO:0000316	IGI	PMID:15457210	UniProtKB:Q15109	9606	regulates_o_occurs_in(UBERON:0000956),occurs_in(UBERON:0000956),regulates_o_occurs_in(GO:0005634),regulates_o_occurs_in(UBERON:6003624)	20170928	P		UniProtKB	P02649	APOE	enables	GO:0042803	protein homodimerization activity	ECO:0000314	IDA	PMID:8089103		9606		20170119	F
UniProtKB	P05067	APP	involved_in	GO:1901224	positive regulation of NIK/NF-kappaB signaling	ECO:0000316	IGI	PMID:15457210	UniProtKB:Q15109	9606	regulates_o_occurs_in(UBERON:0000956),occurs_in(UBERON:0000956),regulates_o_occurs_in(UBERON:6003624)	20170928	P		UniProtKB	P02649	APOE	part_of	GO:0005576	extracellular region	ECO:0000314	IDA	PMID:8089103		9606		20170119	C
UniProtKB	P05067	APP	involved_in	GO:1903980	positive regulation of microglial cell activation	ECO:0000316	IGI	PMID:15457210	UniProtKB:Q15109	9606	regulates_o_occurs_in(UBERON:0000956),occurs_in(UBERON:0000956),happens_during(UBERON:0007222)|regulates_o_occurs_in(UBERON:0002421),occurs_in(UBERON:0002421),happens_during(UBERON:0007222)	20170928	P		UniProtKB	P02649	APOE	involved_in	GO:0045807	positive regulation of endocytosis	ECO:0000314	IDA	PMID:8300609		9606	has_regulation_target(GO:0034361)	20170123	P
UniProtKB	P05067	APP	involved_in	GO:0150003	regulation of spontaneous synaptic transmission	ECO:0000316	IGI	PMID:15457210	UniProtKB:Q15109	9606	happens_during(UBERON:0018241),occurs_in(UBERON:0014554)|happens_during(GO:0007568),occurs_in(UBERON:0014554)	20171215	P		UniProtKB	P02649	APOE	involved_in	GO:1905860	positive regulation of heparan sulfate proteoglycan binding	ECO:0000314	IDA	PMID:8300609		9606	has_regulation_target(GO:0034361)	20170123	P
UniProtKB	P05067	APP	involved_in	GO:0090647	modulation of age-related behavioral decline	ECO:0000304	TAS	PMID:16541076		9606		20170628	P		UniProtKB	P02649	APOE	enables	GO:0001540	amyloid-beta binding	ECO:0000353	IPI	PMID:9003062	CHEBI:64645	9606		20170123	F
UniProtKB	P05067	APP	involved_in	GO:2000310	regulation of NMDA receptor activity	ECO:0000304	TAS	PMID:17360908		9606	regulates_o_occurs_in(CL:0002609)	20170217	P		UniProtKB	P02649	APOE	part_of	GO:0034361	very-low-density lipoprotein particle	ECO:0000314	IDA	PMID:9211985		9606		20170124	C
UniProtKB	P05067	APP	involved_in	GO:0050808	synapse organization	ECO:0000316	IGI	PMID:19587288	UniProtKB:P49582	9606	occurs_in(UBERON:0001870),happens_during(UBERON:0007222),has_input(UniProtKB:P36544)|occurs_in(UBERON:0002421),happens_during(UBERON:0007222),has_input(UniProtKB:P36544)	20170110	P		UniProtKB	P02649	APOE	part_of	GO:0034362	low-density lipoprotein particle	ECO:0000314	IDA	PMID:9211985		9606		20170124	C
UniProtKB	P05067	APP	involved_in	GO:0007611	learning or memory	ECO:0000316	IGI	PMID:19587288	UniProtKB:P49582	9606	has_input(UniProtKB:P36544),happens_during(UBERON:0007222)	20170111	P		UniProtKB	P02649	APOE	part_of	GO:0034363	intermediate-density lipoprotein particle	ECO:0000314	IDA	PMID:9211985		9606		20170124	C
UniProtKB	P05067	APP	involved_in	GO:0010800	positive regulation of peptidyl-threonine phosphorylation	ECO:0000315	IMP	PMID:19660551		9606	occurs_in(UBERON:0002421),part_of(GO:0007568),has_input(UniProtKB:P10636)|occurs_in(UBERON:0000956),part_of(GO:0007568),has_input(UniProtKB:P10636)	20170710	P		UniProtKB	P02649	APOE	part_of	GO:0034364	high-density lipoprotein particle	ECO:0000314	IDA	PMID:9211985		9606		20170124	C
UniProtKB	P05067	APP	involved_in	GO:0033138	positive regulation of peptidyl-serine phosphorylation	ECO:0000315	IMP	PMID:19660551		9606	occurs_in(UBERON:0002421),part_of(GO:0007568),has_input(UniProtKB:P10636)|occurs_in(UBERON:0000956),part_of(GO:0007568),has_input(UniProtKB:P10636)	20170710	P		UniProtKB	P18287	APOE	part_of	GO:0034361	very-low-density lipoprotein particle	ECO:0000314	IDA	PMID:9211985		9986		20170124	C
UniProtKB	P05067	APP	involved_in	GO:1905908	positive regulation of amyloid fibril formation	ECO:0000315	IMP	PMID:19660551		9606	occurs_in(UBERON:0002421),part_of(GO:0007568)|occurs_in(UBERON:0000956),part_of(GO:0007568)	20170710	P		UniProtKB	P18287	APOE	part_of	GO:0034362	low-density lipoprotein particle	ECO:0000314	IDA	PMID:9211985		9986		20170124	C
UniProtKB	P05067	APP	involved_in	GO:2000406	positive regulation of T cell migration	ECO:0000315	IMP	PMID:19660551		9606	occurs_in(UBERON:0002421),part_of(GO:0007568),regulates_o_occurs_in(CL:0000813)|occurs_in(UBERON:0000956),part_of(GO:0007568),regulates_o_occurs_in(CL:0000813)	20170710	P		UniProtKB	P18287	APOE	part_of	GO:0034363	intermediate-density lipoprotein particle	ECO:0000314	IDA	PMID:9211985		9986		20170124	C
UniProtKB	P05067	APP	NOT|involved_in	GO:1905598	negative regulation of low-density lipoprotein receptor activity	ECO:0000316	IGI	PMID:20005821	UniProtKB:P35951,UniProtKB:P49768	9606		20170601	P		UniProtKB	P18287	APOE	part_of	GO:0034364	high-density lipoprotein particle	ECO:0000314	IDA	PMID:9211985		9986		20170124	C
UniProtKB	P05067	APP	involved_in	GO:0007611	learning or memory	ECO:0000316	IGI	PMID:20164328	UniProtKB:P49582	9606	has_input(UniProtKB:P36544),happens_during(UBERON:0018241)	20170111	P		UniProtKB	P02650	Apoe	NOT|enables	GO:0001540	amyloid-beta binding	ECO:0000314	IDA	PMID:9211985		10116		20170124	F
UniProtKB	P05067	APP	part_of	GO:0005886	plasma membrane	ECO:0000314	IDA	PMID:20164328		9606	exists_during(UBERON:0018241),part_of(UBERON:0002421)	20170208	C		UniProtKB	P02650	Apoe	NOT|enables	GO:0042803	protein homodimerization activity	ECO:0000314	IDA	PMID:9211985		10116		20170124	F
UniProtKB	P05067	APP	involved_in	GO:0007611	learning or memory	ECO:0000316	IGI	PMID:20445063	UniProtKB:P04156,UniProtKB:P49768	9606	part_of(GO:0090647),happens_during(GO:0007568)	20170509	P		UniProtKB	P02650	Apoe	part_of	GO:0034361	very-low-density lipoprotein particle	ECO:0000314	IDA	PMID:9211985		10116		20170124	C
UniProtKB	P05067	APP	involved_in	GO:0048143	astrocyte activation	ECO:0000316	IGI	PMID:20445063	UniProtKB:P49768	9606	occurs_in(UBERON:0000956)	20170509	P		UniProtKB	P02650	Apoe	part_of	GO:0034362	low-density lipoprotein particle	ECO:0000314	IDA	PMID:9211985		10116		20170124	C
UniProtKB	P05067	APP	involved_in	GO:0090647	modulation of age-related behavioral decline	ECO:0000316	IGI	PMID:20445063	UniProtKB:P04156,UniProtKB:P49768	9606	happens_during(GO:0007568)	20170509	P		UniProtKB	P02650	Apoe	part_of	GO:0034363	intermediate-density lipoprotein particle	ECO:0000314	IDA	PMID:9211985		10116		20170124	C
UniProtKB	P05067	APP	involved_in	GO:1990535	neuron projection maintenance	ECO:0000316	IGI	PMID:20445063	UniProtKB:P04156,UniProtKB:P49768	9606	occurs_in(CL:0000850),occurs_in(GO:0030424)	20170831	P		UniProtKB	P02650	Apoe	part_of	GO:0034364	high-density lipoprotein particle	ECO:0000314	IDA	PMID:9211985		10116		20170124	C
UniProtKB	P05067	APP	involved_in	GO:0098815	modulation of excitatory postsynaptic potential	ECO:0000316	IGI	PMID:20974225	UniProtKB:P49582	9606	occurs_in(UBERON:0003881),happens_during(UBERON:0018241)	20170425	P		UniProtKB	P02649	APOE	enables	GO:0001540	amyloid-beta binding	ECO:0000353	IPI	PMID:9211985	UniProtKB:P05067:PRO_0000000093	9606	occurs_in(GO:0034362)|occurs_in(GO:0034363)|occurs_in(GO:0034361)	20170425	F
UniProtKB	P05067	APP	involved_in	GO:1900273	positive regulation of long-term synaptic potentiation	ECO:0000316	IGI	PMID:20974225	UniProtKB:P49582	9606	occurs_in(UBERON:0003881),happens_during(UBERON:0018241)	20170425	P		UniProtKB	P02649	APOE	enables	GO:0042803	protein homodimerization activity	ECO:0000314	IDA	PMID:9211985		9606	occurs_in(GO:0034364)|occurs_in(GO:0034362)|occurs_in(GO:0034363)|occurs_in(GO:0034361)	20170425	F
UniProtKB	P05067	APP	involved_in	GO:0007611	learning or memory	ECO:0000316	IGI	PMID:21113149	UniProtKB:P54763	9606	occurs_in(UBERON:0001885)	20170620	P		UniProtKB	P18287	APOE	enables	GO:0001540	amyloid-beta binding	ECO:0000353	IPI	PMID:9211985	UniProtKB:P05067:PRO_0000000093	9986	occurs_in(GO:0034362)|occurs_in(GO:0034363)|occurs_in(GO:0034361)	20170425	F
UniProtKB	P05067	APP	involved_in	GO:0010468	regulation of gene expression	ECO:0000316	IGI	PMID:21857966	UniProtKB:P49768	9606	regulates_expression_of(ENSEMBL:ENSG00000163251),regulates(GO:0018108),occurs_in(UBERON:0002421),regulates_o_occurs_in(UBERON:0002421)|regulates_expression_of(ENSEMBL:ENSG00000114251),regulates(GO:0018108),occurs_in(UBERON:0002421),regulates_o_occurs_in(UBERON:0002421)	20171220	P		UniProtKB	P18287	APOE	enables	GO:0042277	peptide binding	ECO:0000353	IPI	PMID:9211985	UniProtKB:P05067:PRO_0000000093	9986	occurs_in(GO:0034362)|occurs_in(GO:0034363)|occurs_in(GO:0034361)	20170425	F
UniProtKB	P05067	APP	involved_in	GO:0030111	regulation of Wnt signaling pathway	ECO:0000305	IC	PMID:21857966	GO:0010468	9606	occurs_in(UBERON:0002421),regulates_o_occurs_in(UBERON:0002421),causally_upstream_of(GO:0070997)	20171220	P		UniProtKB	P18287	APOE	enables	GO:0042803	protein homodimerization activity	ECO:0000314	IDA	PMID:9211985		9986	occurs_in(GO:0034362)|occurs_in(GO:0034363)|occurs_in(GO:0034361)	20170425	F
UniProtKB	P05067	APP	involved_in	GO:0050730	regulation of peptidyl-tyrosine phosphorylation	ECO:0000316	IGI	PMID:21857966	UniProtKB:P49768	9606	has_regulation_target(UniProtKB:Q9UQM7)	20171220	P		UniProtKB	P02649	APOE	involved_in	GO:1905908	positive regulation of amyloid fibril formation	ECO:0000304	TAS	PMID:9228033		9606		20170502	P
UniProtKB	P05067	APP	involved_in	GO:0010628	positive regulation of gene expression	ECO:0000316	IGI	PMID:22198949	UniProtKB:P49768	9606	regulates_expression_of(ENSEMBL:ENSG00000136634),occurs_in(UBERON:0000955)|regulates_expression_of(ENSEMBL:ENSG00000118520),occurs_in(UBERON:0000955)	20170523	P		UniProtKB	P05067	APP	involved_in	GO:0007612	learning	ECO:0000315	IMP	PMID:11140684		9606	part_of(GO:0090647)	20170710	P
UniProtKB	P05067	APP	involved_in	GO:0010629	negative regulation of gene expression	ECO:0000316	IGI	PMID:22198949	UniProtKB:P49768	9606	regulates_expression_of(ENSEMBL:ENSG00000232810),occurs_in(UBERON:0000955)|regulates_expression_of(ENSEMBL:ENSG00000125538),occurs_in(UBERON:0000955)|regulates_expression_of(ENSEMBL:ENSG00000108691),occurs_in(UBERON:0000955)	20170523	P		UniProtKB	P05067	APP	involved_in	GO:0090647	modulation of age-related behavioral decline	ECO:0000315	IMP	PMID:11140684		9606		20170710	P
UniProtKB	P05067	APP	involved_in	GO:0014005	microglia development	ECO:0000316	IGI	PMID:22198949	UniProtKB:P49768,UniProtKB:Q9QUN7	9606	has_agent(CL:0002092),occurs_in(UBERON:0002421)	20170523	P		UniProtKB	P05067:PRO_0000000092	APP	involved_in	GO:0007613	memory	ECO:0000316	IGI	PMID:11140685	ComplexPortal:CPX-1134	9606	part_of(GO:0090647)	20170710	P
UniProtKB	P05067	APP	involved_in	GO:0032640	tumor necrosis factor production	ECO:0000316	IGI	PMID:22198949	UniProtKB:P49768,UniProtKB:Q9QUN7	9606	has_agent(CL:0002092),occurs_in(UBERON:0002421)	20170523	P		UniProtKB	P05067:PRO_0000000092	APP	involved_in	GO:0090647	modulation of age-related behavioral decline	ECO:0000316	IGI	PMID:11140685	ComplexPortal:CPX-1134	9606		20170710	P
UniProtKB	P05067	APP	involved_in	GO:0002265	astrocyte activation involved in immune response	ECO:0000316	IGI	PMID:23152628	UniProtKB:A0A0R4J0I9,UniProtKB:P49768	9606	part_of(GO:1904646),occurs_in(CL:0002590)	20170503	P		UniProtKB	P05067:PRO_0000000092	APP	involved_in	GO:1905906	regulation of amyloid fibril formation	ECO:0000316	IGI	PMID:11140685	ComplexPortal:CPX-1134	9606	occurs_in(UBERON:0002421)|occurs_in(UBERON:0000956)	20170710	P
UniProtKB	P05067	APP	involved_in	GO:1904646	cellular response to amyloid-beta	ECO:0000316	IGI	PMID:23152628	UniProtKB:A0A0R4J0I9,UniProtKB:P49768	9606	occurs_in(CL:0002590)	20170503	P		UniProtKB	P05067:PRO_0000000092	APP	involved_in	GO:0007186	G-protein coupled receptor signaling pathway	ECO:0000314	IDA	PMID:11160457		9606	part_of(GO:1904646),regulates_o_occurs_in(CL:0000576),part_of(GO:0019722),part_of(GO:0097237)	20170605	P
UniProtKB	P05067	APP	involved_in	GO:0010628	positive regulation of gene expression	ECO:0000315	IMP	PMID:23164821		9606	occurs_in(UBERON:0000956),regulates_expression_of(ENSEMBL:ENSG00000155090)|occurs_in(UBERON:0000956),regulates_expression_of(ENSEMBL:ENSG00000110092)|occurs_in(UBERON:0000956),regulates_expression_of(ENSEMBL:ENSG00000170345)|occurs_in(UBERON:0000956),regulates_expression_of(ENSEMBL:ENSG00000120738)	20170427	P		UniProtKB	P05067:PRO_0000000092	APP	involved_in	GO:0007186	G-protein coupled receptor signaling pathway	ECO:0000316	IGI	PMID:11160457	UniProtKB:P25090	9606	part_of(GO:1904646),occurs_in(CL:0000576),part_of(GO:0019722),positively_regulates(GO:0002548)	20170605	P
UniProtKB	P05067	APP	involved_in	GO:1902004	positive regulation of amyloid-beta formation	ECO:0000316	IGI	PMID:23640054	UniProtKB:P49768	9606	part_of(GO:0007568),has_output(UniProtKB:P05067:PRO_0000000092),has_output(UniProtKB:P05067:PRO_0000000093),regulates_o_occurs_in(UBERON:0000955),occurs_in(UBERON:0000955),has_output(ComplexPortal:CPX-1120)|part_of(GO:0007568),has_output(UniProtKB:P05067:PRO_0000000092),has_output(UniProtKB:P05067:PRO_0000000093),regulates_o_occurs_in(UBERON:0000913),occurs_in(UBERON:0000955),has_output(ComplexPo…	20170710	P		UniProtKB	P05067:PRO_0000000092	APP	involved_in	GO:0019722	calcium-mediated signaling	ECO:0000314	IDA	PMID:11160457		9606	part_of(GO:1904646),occurs_in(CL:0000576)	20170605	P
UniProtKB	P05067	APP	involved_in	GO:0045944	positive regulation of transcription by RNA polymerase II	ECO:0000316	IGI	PMID:23921129	ComplexPortal:CPX-1134	9606	part_of(GO:1904646),regulates_transcription_of(ENSEMBL:ENSG00000072694)	20170622	P		UniProtKB	P05067:PRO_0000000092	APP	involved_in	GO:0019722	calcium-mediated signaling	ECO:0000316	IGI	PMID:11160457	UniProtKB:P25090	9606	part_of(GO:1904646),occurs_in(CL:0000576),positively_regulates(GO:0002548)	20170605	P
UniProtKB	P05067	APP	involved_in	GO:0046330	positive regulation of JNK cascade	ECO:0000316	IGI	PMID:23921129	ComplexPortal:CPX-1134	9606	regulates_o_occurs_in(CL:0002609),part_of(GO:1904646),part_of(GO:1901216)	20170622	P		UniProtKB	P05067:PRO_0000000092	APP	involved_in	GO:0090026	positive regulation of monocyte chemotaxis	ECO:0000314	IDA	PMID:11160457		9606	part_of(GO:1904646)	20170605	P
UniProtKB	P05067	APP	involved_in	GO:0048169	regulation of long-term neuronal synaptic plasticity	ECO:0000316	IGI	PMID:23921129	ComplexPortal:CPX-1134	9606	regulates_o_occurs_in(UBERON:0001954),occurs_in(UBERON:0001954)	20170622	P		UniProtKB	P05067:PRO_0000000092	APP	involved_in	GO:0090026	positive regulation of monocyte chemotaxis	ECO:0000316	IGI	PMID:11160457	UniProtKB:P25090	9606	part_of(GO:1904646),occurs_in(CL:0000576)	20170605	P
UniProtKB	P05067	APP	involved_in	GO:0051091	positive regulation of DNA-binding transcription factor activity	ECO:0000316	IGI	PMID:23921129	ComplexPortal:CPX-1134	9606	regulates_o_occurs_in(CL:0002609),part_of(GO:1904646),regulates_activity_of(UniProtKB:P05412)	20170622	P		UniProtKB	P05067:PRO_0000000092	APP	enables	GO:0030546	receptor activator activity	ECO:0000314	IDA	PMID:11316806		9606	has_input(UniProtKB:P25090),positively_regulates(GO:0007186)	20170609	F
UniProtKB	P05067	APP	part_of	GO:0005615	extracellular space	ECO:0000314	IDA	PMID:23921129		9606	part_of(UBERON:0001954)	20170622	C		UniProtKB	P05067:PRO_0000000092	APP	enables	GO:0042056	chemoattractant activity	ECO:0000316	IGI	PMID:11316806	UniProtKB:O88536	9606	results_in_movement_of(CL:0000775)|results_in_movement_of(CL:0000129)	20170609	F
UniProtKB	P05067	APP	involved_in	GO:0007611	learning or memory	ECO:0000304	TAS	PMID:24012003		9606	part_of(GO:0090647),happens_during(GO:0007568)	20170509	P		UniProtKB	P05067:PRO_0000000092	APP	involved_in	GO:0032930	positive regulation of superoxide anion generation	ECO:0000316	IGI	PMID:11316806	UniProtKB:O88536	9606	occurs_in(CL:0000775)	20170609	P
UniProtKB	P05067	APP	involved_in	GO:0007611	learning or memory	ECO:0000316	IGI	PMID:24012003	UniProtKB:P41594,UniProtKB:P49768	9606	part_of(GO:0090647),happens_during(GO:0007568)	20170509	P		UniProtKB	P05067:PRO_0000000092	APP	involved_in	GO:0045745	positive regulation of G-protein coupled receptor protein signaling pathway	ECO:0000314	IDA	PMID:11316806		9606	has_regulation_target(UniProtKB:O88536),occurs_in(CL:0000129)|has_regulation_target(UniProtKB:P25090)|has_regulation_target(UniProtKB:O88536),occurs_in(CL:0000775)	20170609	P
UniProtKB	P05067	APP	involved_in	GO:0050808	synapse organization	ECO:0000316	IGI	PMID:24012003	UniProtKB:P41594,UniProtKB:P49768	9606	part_of(GO:0090647),happens_during(GO:0007568),occurs_in(UBERON:0001885)	20170509	P		UniProtKB	P05067	APP	involved_in	GO:0001934	positive regulation of protein phosphorylation	ECO:0000314	IDA	PMID:11404397		9606	occurs_in(UBERON:0001885),has_regulation_target(UniProtKB:P16220)|occurs_in(UBERON:0003881),has_regulation_target(UniProtKB:P16220),happens_during(UBERON:0018241)	20170210	P
UniProtKB	P05067	APP	involved_in	GO:0090647	modulation of age-related behavioral decline	ECO:0000304	TAS	PMID:24012003		9606		20170509	P		UniProtKB	P05067	APP	involved_in	GO:0001934	positive regulation of protein phosphorylation	ECO:0000314	IDA	PMID:11404397		9606	occurs_in(UBERON:0001885),has_regulation_target(UniProtKB:P28482),happens_during(UBERON:0018241)|occurs_in(UBERON:0003881),has_regulation_target(UniProtKB:P28482),happens_during(UBERON:0018241)	20170210	P
UniProtKB	P05067	APP	involved_in	GO:0090647	modulation of age-related behavioral decline	ECO:0000316	IGI	PMID:24012003	UniProtKB:P41594,UniProtKB:P49768	9606	happens_during(GO:0007568)	20170509	P		UniProtKB	P05067	APP	involved_in	GO:0051247	positive regulation of protein metabolic process	ECO:0000315	IMP	PMID:11404397		9606	occurs_in(UBERON:0001885),has_regulation_target(UniProtKB:P36544),happens_during(GO:0007568)|occurs_in(UBERON:0003881),has_regulation_target(UniProtKB:P36544),happens_during(GO:0007568)	20170210	P
UniProtKB	P05067	APP	involved_in	GO:0007611	learning or memory	ECO:0000316	IGI	PMID:24052308	UniProtKB:P49768,UniProtKB:P97484	9606	happens_during(UBERON:0018241),occurs_in(UBERON:0007023)	20170725	P		UniProtKB	P05067:PRO_0000000092	APP	involved_in	GO:0000187	activation of MAPK activity	ECO:0000304	TAS	PMID:11404397		9606	occurs_in(CL:0002609)|occurs_in(CL:0002608)	20170210	P
UniProtKB	P05067	APP	involved_in	GO:0032092	positive regulation of protein binding	ECO:0000316	IGI	PMID:24052308	UniProtKB:P49768,UniProtKB:P97484	9606	has_regulation_target(UniProtKB:P97484),has_regulation_target(UniProtKB:P18760),regulates_o_occurs_in(UBERON:0001890),occurs_in(UBERON:0001890)	20170725	P		UniProtKB	P08592	App	involved_in	GO:0051247	positive regulation of protein metabolic process	ECO:0000314	IDA	PMID:11404397		10116	occurs_in(UBERON:0002421),has_regulation_target(UniProtKB:Q05941)	20170210	P
UniProtKB	P05067	APP	involved_in	GO:0090647	modulation of age-related behavioral decline	ECO:0000304	TAS	PMID:25390368		9606	causally_upstream_of(GO:0007611)	20170421	P		UniProtKB	P08592:PRO_0000000163	App	involved_in	GO:0000187	activation of MAPK activity	ECO:0000314	IDA	PMID:11404397		10116	occurs_in(UBERON:0002421),has_regulation_target(UniProtKB:P63086)	20170210	P
UniProtKB	P05067	APP	involved_in	GO:0042327	positive regulation of phosphorylation	ECO:0000316	IGI	PMID:25707991	UniProtKB:P49768	9606	occurs_in(UBERON:0002421),has_regulation_target(UniProtKB:Q14289),regulates_o_occurs_in(UBERON:0003881)|occurs_in(UBERON:0000956),has_regulation_target(UniProtKB:Q14289)	20171031	P		UniProtKB	P08592:PRO_0000000163	App	involved_in	GO:0000187	activation of MAPK activity	ECO:0000316	IGI	PMID:11404397	UniProtKB:Q05941	10116	occurs_in(UBERON:0002421),has_regulation_target(UniProtKB:P63086),activated_by(CHEBI:39124)	20170210	P
UniProtKB	P05067	APP	involved_in	GO:0010628	positive regulation of gene expression	ECO:0000316	IGI	PMID:27853422	UniProtKB:P49768	9606	regulates_expression_of(ENSEMBL:ENSG00000067900),regulates(GO:0006914)	20171206	P		UniProtKB	P08592:PRO_0000000163	App	involved_in	GO:0070374	positive regulation of ERK1 and ERK2 cascade	ECO:0000314	IDA	PMID:11404397		10116	occurs_in(UBERON:0002421),has_regulation_target(UniProtKB:P63086)	20170210	P
UniProtKB	P05067	APP	involved_in	GO:0010629	negative regulation of gene expression	ECO:0000316	IGI	PMID:27853422	UniProtKB:P49768	9606	regulates_expression_of(ENSEMBL:ENSG00000126581),regulates(GO:0006914)	20171206	P		UniProtKB	P08592:PRO_0000000163	App	involved_in	GO:0070374	positive regulation of ERK1 and ERK2 cascade	ECO:0000316	IGI	PMID:11404397	UniProtKB:Q05941	10116	occurs_in(UBERON:0002421),has_regulation_target(UniProtKB:P63086),part_of(GO:0051592)	20170210	P
UniProtKB	P05067:PRO_0000000089	APP	part_of	GO:0005615	extracellular space	ECO:0000314	IDA	PMID:20164328		9606	exists_during(UBERON:0018241),part_of(UBERON:0002421)	20170208	C		UniProtKB	P08592:PRO_0000000163	App	involved_in	GO:1905945	regulation of response to calcium ion	ECO:0000316	IGI	PMID:11404397	UniProtKB:Q05941	10116	occurs_in(UBERON:0002421)	20170213	P
UniProtKB	P05067:PRO_0000000089	APP	involved_in	GO:0031175	neuron projection development	ECO:0000304	TAS	PMID:27853422		9606	causally_upstream_of(GO:0099177)	20171206	P		UniProtKB	P05067:PRO_0000000092	APP	colocalizes_with	GO:0005737	cytoplasm	ECO:0000314	IDA	PMID:11689470		9606	part_of(CL:0000235)	20170613	C
UniProtKB	P05067:PRO_0000000092	APP	involved_in	GO:0000187	activation of MAPK activity	ECO:0000250	ISS	GO_REF:0000024	UniProtKB:P08592:PRO_0000000163	9606	occurs_in(UBERON:0002421),has_regulation_target(UniProtKB:P28482)	20170210	P		UniProtKB	P05067:PRO_0000000092	APP	colocalizes_with	GO:0005886	plasma membrane	ECO:0000314	IDA	PMID:11689470		9606	part_of(CL:0000235)	20170613	C
UniProtKB	P05067:PRO_0000000092	APP	involved_in	GO:0000187	activation of MAPK activity	ECO:0000250	ISS	GO_REF:0000024	UniProtKB:P08592:PRO_0000000163	9606	occurs_in(UBERON:0002421),has_regulation_target(UniProtKB:P28482),activated_by(CHEBI:39124)	20170210	P		UniProtKB	P05067:PRO_0000000092	APP	involved_in	GO:0043065	positive regulation of apoptotic process	ECO:0000314	IDA	PMID:11689470		9606	regulates_o_occurs_in(CL:0000235)	20170613	P
UniProtKB	P05067:PRO_0000000092	APP	involved_in	GO:0070374	positive regulation of ERK1 and ERK2 cascade	ECO:0000250	ISS	GO_REF:0000024	UniProtKB:P08592:PRO_0000000163	9606	occurs_in(UBERON:0002421),has_regulation_target(UniProtKB:P28482)	20170210	P		UniProtKB	P05067:PRO_0000000092	APP	involved_in	GO:0043065	positive regulation of apoptotic process	ECO:0000316	IGI	PMID:11689470	UniProtKB:P25090	9606		20170613	P
UniProtKB	P05067:PRO_0000000092	APP	involved_in	GO:0070374	positive regulation of ERK1 and ERK2 cascade	ECO:0000250	ISS	GO_REF:0000024	UniProtKB:P08592:PRO_0000000163	9606	occurs_in(UBERON:0002421),has_regulation_target(UniProtKB:P28482),part_of(GO:0051592)	20170210	P		UniProtKB	P05067:PRO_0000000092	APP	involved_in	GO:0050867	positive regulation of cell activation	ECO:0000303	NAS	PMID:11689470		9606	regulates_o_occurs_in(CL:0000234)	20170613	P
UniProtKB	P05067:PRO_0000000092	APP	involved_in	GO:1905945	regulation of response to calcium ion	ECO:0000250	ISS	GO_REF:0000024	UniProtKB:P08592:PRO_0000000163	9606	occurs_in(UBERON:0002421)	20170213	P		UniProtKB	P05067	APP	involved_in	GO:0007611	learning or memory	ECO:0000315	IMP	PMID:11880515		9606	part_of(GO:0090647)	20170710	P
UniProtKB	P05067:PRO_0000000092	APP	involved_in	GO:0007613	memory	ECO:0000316	IGI	PMID:11140685	ComplexPortal:CPX-1134	9606	part_of(GO:0090647)	20170710	P		UniProtKB	P05067	APP	involved_in	GO:0090647	modulation of age-related behavioral decline	ECO:0000315	IMP	PMID:11880515		9606		20170710	P
UniProtKB	P05067:PRO_0000000092	APP	involved_in	GO:0090647	modulation of age-related behavioral decline	ECO:0000316	IGI	PMID:11140685	ComplexPortal:CPX-1134	9606		20170710	P		UniProtKB	P05067:PRO_0000000092	APP	involved_in	GO:0000185	activation of MAPKKK activity	ECO:0000316	IGI	PMID:15190117	ComplexPortal:CPX-1134	9606	occurs_in(UBERON:0002421),part_of(GO:0045666),has_agent(GO:0106003)	20170614	P
UniProtKB	P05067:PRO_0000000092	APP	involved_in	GO:1905906	regulation of amyloid fibril formation	ECO:0000316	IGI	PMID:11140685	ComplexPortal:CPX-1134	9606	occurs_in(UBERON:0002421)|occurs_in(UBERON:0000956)	20170710	P		UniProtKB	P05067:PRO_0000000092	APP	involved_in	GO:0043410	positive regulation of MAPK cascade	ECO:0000316	IGI	PMID:15190117	ComplexPortal:CPX-1134	9606	occurs_in(UBERON:0002421),part_of(GO:0045666),has_agent(GO:0106003)	20170614	P
UniProtKB	P05067:PRO_0000000092	APP	involved_in	GO:0007186	G-protein coupled receptor signaling pathway	ECO:0000314	IDA	PMID:11160457		9606	part_of(GO:1904646),regulates_o_occurs_in(CL:0000576),part_of(GO:0019722),part_of(GO:0097237)	20170605	P		UniProtKB	P05067:PRO_0000000092	APP	involved_in	GO:0045666	positive regulation of neuron differentiation	ECO:0000316	IGI	PMID:15190117	ComplexPortal:CPX-1134	9606	occurs_in(UBERON:0002421),has_agent(GO:0106003)	20170614	P
UniProtKB	P05067:PRO_0000000092	APP	involved_in	GO:0007186	G-protein coupled receptor signaling pathway	ECO:0000316	IGI	PMID:11160457	UniProtKB:P25090	9606	part_of(GO:1904646),occurs_in(CL:0000576),part_of(GO:0019722),positively_regulates(GO:0002548)	20170605	P		UniProtKB	P05067:PRO_0000000092	APP	involved_in	GO:0061098	positive regulation of protein tyrosine kinase activity	ECO:0000316	IGI	PMID:15190117	ComplexPortal:CPX-1134	9606	occurs_in(UBERON:0002421),part_of(GO:0045666),has_agent(GO:0106003)	20170614	P
UniProtKB	P05067:PRO_0000000092	APP	involved_in	GO:0019722	calcium-mediated signaling	ECO:0000314	IDA	PMID:11160457		9606	part_of(GO:1904646),occurs_in(CL:0000576)	20170605	P		UniProtKB	P05067:PRO_0000000092	APP	involved_in	GO:0051260	protein homooligomerization	ECO:0000314	IDA	PMID:15447668		9606		20170210	P
UniProtKB	P05067:PRO_0000000092	APP	involved_in	GO:0019722	calcium-mediated signaling	ECO:0000316	IGI	PMID:11160457	UniProtKB:P25090	9606	part_of(GO:1904646),occurs_in(CL:0000576),positively_regulates(GO:0002548)	20170605	P		UniProtKB	P05067:PRO_0000000093	APP	enables	GO:0042803	protein homodimerization activity	ECO:0000314	IDA	PMID:15447668		9606		20170210	F
UniProtKB	P05067:PRO_0000000092	APP	involved_in	GO:0090026	positive regulation of monocyte chemotaxis	ECO:0000314	IDA	PMID:11160457		9606	part_of(GO:1904646)	20170605	P		UniProtKB	P05067:PRO_0000000092	APP	enables	GO:0042803	protein homodimerization activity	ECO:0000314	IDA	PMID:15447668		9606		20170213	F
UniProtKB	P05067:PRO_0000000092	APP	involved_in	GO:0090026	positive regulation of monocyte chemotaxis	ECO:0000316	IGI	PMID:11160457	UniProtKB:P25090	9606	part_of(GO:1904646),occurs_in(CL:0000576)	20170605	P		UniProtKB	P05067:PRO_0000000093	APP	involved_in	GO:0051260	protein homooligomerization	ECO:0000314	IDA	PMID:15447668		9606	has_input(UniProtKB:P05067:PRO_0000000093)	20170213	P
UniProtKB	P05067:PRO_0000000092	APP	enables	GO:0030546	receptor activator activity	ECO:0000314	IDA	PMID:11316806		9606	has_input(UniProtKB:P25090),positively_regulates(GO:0007186)	20170609	F		UniProtKB	P05067	APP	involved_in	GO:0001934	positive regulation of protein phosphorylation	ECO:0000316	IGI	PMID:15457210	UniProtKB:Q15109	9606	happens_during(UBERON:0007222),positively_regulates(GO:0004683),occurs_in(UBERON:0002421),regulates_o_occurs_in(UBERON:0002421)	20170928	P
UniProtKB	P05067:PRO_0000000092	APP	enables	GO:0042056	chemoattractant activity	ECO:0000316	IGI	PMID:11316806	UniProtKB:O88536	9606	results_in_movement_of(CL:0000775)|results_in_movement_of(CL:0000129)	20170609	F		UniProtKB	P05067	APP	involved_in	GO:0001934	positive regulation of protein phosphorylation	ECO:0000316	IGI	PMID:15457210	UniProtKB:Q15109	9606	has_regulation_target(UniProtKB:Q16539),happens_during(UBERON:0018241)	20170928	P
UniProtKB	P05067:PRO_0000000092	APP	involved_in	GO:0032930	positive regulation of superoxide anion generation	ECO:0000316	IGI	PMID:11316806	UniProtKB:O88536	9606	occurs_in(CL:0000775)	20170609	P		UniProtKB	P05067	APP	involved_in	GO:0001934	positive regulation of protein phosphorylation	ECO:0000316	IGI	PMID:15457210	UniProtKB:Q15109	9606	part_of(GO:0032793),happens_during(UBERON:0018241)	20170928	P
UniProtKB	P05067:PRO_0000000092	APP	involved_in	GO:0045745	positive regulation of G-protein coupled receptor protein signaling pathway	ECO:0000314	IDA	PMID:11316806		9606	has_regulation_target(UniProtKB:O88536),occurs_in(CL:0000129)|has_regulation_target(UniProtKB:P25090)|has_regulation_target(UniProtKB:O88536),occurs_in(CL:0000775)	20170609	P		UniProtKB	P05067	APP	involved_in	GO:0007611	learning or memory	ECO:0000315	IMP	PMID:15457210		9606	happens_during(UBERON:0018241)	20170928	P
UniProtKB	P05067:PRO_0000000092	APP	involved_in	GO:0000187	activation of MAPK activity	ECO:0000304	TAS	PMID:11404397		9606	occurs_in(CL:0002609)|occurs_in(CL:0002608)	20170210	P		UniProtKB	P05067	APP	involved_in	GO:0007611	learning or memory	ECO:0000316	IGI	PMID:15457210	UniProtKB:Q15109	9606	happens_during(UBERON:0018241)	20170928	P
UniProtKB	P05067:PRO_0000000092	APP	colocalizes_with	GO:0005737	cytoplasm	ECO:0000314	IDA	PMID:11689470		9606	part_of(CL:0000235)	20170613	C		UniProtKB	P05067	APP	involved_in	GO:0010628	positive regulation of gene expression	ECO:0000315	IMP	PMID:15457210		9606	regulates_expression_of(ENSEMBL:ENSG00000204305),regulates_o_occurs_in(UBERON:0000956),occurs_in(UBERON:0000956),regulates_o_occurs_in(UBERON:6003624)	20170928	P
UniProtKB	P05067:PRO_0000000092	APP	colocalizes_with	GO:0005886	plasma membrane	ECO:0000314	IDA	PMID:11689470		9606	part_of(CL:0000235)	20170613	C		UniProtKB	P05067	APP	involved_in	GO:0051092	positive regulation of NF-kappaB transcription factor activity	ECO:0000316	IGI	PMID:15457210	UniProtKB:Q15109	9606	regulates_o_occurs_in(UBERON:0000956),occurs_in(UBERON:0000956),regulates_o_occurs_in(GO:0005634),regulates_o_occurs_in(UBERON:6003624)	20170928	P
UniProtKB	P05067:PRO_0000000092	APP	involved_in	GO:0043065	positive regulation of apoptotic process	ECO:0000314	IDA	PMID:11689470		9606	regulates_o_occurs_in(CL:0000235)	20170613	P		UniProtKB	P05067	APP	involved_in	GO:0061890	positive regulation of astrocyte activation	ECO:0000316	IGI	PMID:15457210	UniProtKB:Q15109	9606	regulates_o_occurs_in(UBERON:0000956),occurs_in(UBERON:0000956),happens_during(UBERON:0007222)|regulates_o_occurs_in(UBERON:0002421),occurs_in(UBERON:0002421),happens_during(UBERON:0007222)	20170928	P
UniProtKB	P05067:PRO_0000000092	APP	involved_in	GO:0043065	positive regulation of apoptotic process	ECO:0000316	IGI	PMID:11689470	UniProtKB:P25090	9606		20170613	P		UniProtKB	P05067	APP	involved_in	GO:0070374	positive regulation of ERK1 and ERK2 cascade	ECO:0000316	IGI	PMID:15457210	UniProtKB:Q15109	9606	happens_during(UBERON:0018241)	20170928	P
UniProtKB	P05067:PRO_0000000092	APP	involved_in	GO:0050867	positive regulation of cell activation	ECO:0000303	NAS	PMID:11689470		9606	regulates_o_occurs_in(CL:0000234)	20170613	P		UniProtKB	P05067	APP	involved_in	GO:0090647	modulation of age-related behavioral decline	ECO:0000315	IMP	PMID:15457210		9606		20170928	P
UniProtKB	P05067:PRO_0000000092	APP	involved_in	GO:0000185	activation of MAPKKK activity	ECO:0000316	IGI	PMID:15190117	ComplexPortal:CPX-1134	9606	occurs_in(UBERON:0002421),part_of(GO:0045666),has_agent(GO:0106003)	20170614	P		UniProtKB	P05067	APP	involved_in	GO:0090647	modulation of age-related behavioral decline	ECO:0000316	IGI	PMID:15457210	UniProtKB:Q15109	9606		20170928	P
UniProtKB	P05067:PRO_0000000092	APP	involved_in	GO:0043410	positive regulation of MAPK cascade	ECO:0000316	IGI	PMID:15190117	ComplexPortal:CPX-1134	9606	occurs_in(UBERON:0002421),part_of(GO:0045666),has_agent(GO:0106003)	20170614	P		UniProtKB	P05067	APP	involved_in	GO:1900272	negative regulation of long-term synaptic potentiation	ECO:0000316	IGI	PMID:15457210	UniProtKB:Q15109	9606	occurs_in(UBERON:6003624),regulates_o_occurs_in(UBERON:0014554),happens_during(GO:0007568)	20170928	P
UniProtKB	P05067:PRO_0000000092	APP	involved_in	GO:0045666	positive regulation of neuron differentiation	ECO:0000316	IGI	PMID:15190117	ComplexPortal:CPX-1134	9606	occurs_in(UBERON:0002421),has_agent(GO:0106003)	20170614	P		UniProtKB	P05067	APP	involved_in	GO:1901224	positive regulation of NIK/NF-kappaB signaling	ECO:0000316	IGI	PMID:15457210	UniProtKB:Q15109	9606	regulates_o_occurs_in(UBERON:0000956),occurs_in(UBERON:0000956),regulates_o_occurs_in(GO:0005634),regulates_o_occurs_in(UBERON:6003624)	20170928	P
UniProtKB	P05067:PRO_0000000092	APP	involved_in	GO:0061098	positive regulation of protein tyrosine kinase activity	ECO:0000316	IGI	PMID:15190117	ComplexPortal:CPX-1134	9606	occurs_in(UBERON:0002421),part_of(GO:0045666),has_agent(GO:0106003)	20170614	P		UniProtKB	P05067	APP	involved_in	GO:1901224	positive regulation of NIK/NF-kappaB signaling	ECO:0000316	IGI	PMID:15457210	UniProtKB:Q15109	9606	regulates_o_occurs_in(UBERON:0000956),occurs_in(UBERON:0000956),regulates_o_occurs_in(UBERON:6003624)	20170928	P
UniProtKB	P05067:PRO_0000000092	APP	involved_in	GO:0051260	protein homooligomerization	ECO:0000314	IDA	PMID:15447668		9606		20170210	P		UniProtKB	P05067	APP	involved_in	GO:1903980	positive regulation of microglial cell activation	ECO:0000316	IGI	PMID:15457210	UniProtKB:Q15109	9606	regulates_o_occurs_in(UBERON:0000956),occurs_in(UBERON:0000956),happens_during(UBERON:0007222)|regulates_o_occurs_in(UBERON:0002421),occurs_in(UBERON:0002421),happens_during(UBERON:0007222)	20170928	P
UniProtKB	P05067:PRO_0000000092	APP	enables	GO:0042803	protein homodimerization activity	ECO:0000314	IDA	PMID:15447668		9606		20170213	F		UniProtKB	P05067:PRO_0000000092	APP	colocalizes_with	GO:0009986	cell surface	ECO:0000303	NAS	PMID:15457210		9606		20170928	C
UniProtKB	P05067:PRO_0000000092	APP	colocalizes_with	GO:0009986	cell surface	ECO:0000303	NAS	PMID:15457210		9606		20170928	C		UniProtKB	P05067:PRO_0000000093	APP	colocalizes_with	GO:0009986	cell surface	ECO:0000303	NAS	PMID:15457210		9606		20170928	C
UniProtKB	P05067:PRO_0000000092	APP	NOT|colocalizes_with	GO:0032590	dendrite membrane	ECO:0000314	IDA	PMID:15537891		9606		20170711	C		UniProtKB	P05067	APP	involved_in	GO:0150003	regulation of spontaneous synaptic transmission	ECO:0000316	IGI	PMID:15457210	UniProtKB:Q15109	9606	happens_during(UBERON:0018241),occurs_in(UBERON:0014554)|happens_during(GO:0007568),occurs_in(UBERON:0014554)	20171215	P
UniProtKB	P05067:PRO_0000000092	APP	NOT|part_of	GO:0031232	extrinsic component of external side of plasma membrane	ECO:0000314	IDA	PMID:15537891		9606		20170711	C		UniProtKB	P05067:PRO_0000000092	APP	NOT|colocalizes_with	GO:0032590	dendrite membrane	ECO:0000314	IDA	PMID:15537891		9606		20170711	C
UniProtKB	P05067:PRO_0000000092	APP	part_of	GO:0005622	intracellular	ECO:0000314	IDA	PMID:16541076		9606		20170208	C		UniProtKB	P05067:PRO_0000000092	APP	NOT|part_of	GO:0031232	extrinsic component of external side of plasma membrane	ECO:0000314	IDA	PMID:15537891		9606		20170711	C
UniProtKB	P05067:PRO_0000000092	APP	involved_in	GO:0007613	memory	ECO:0000316	IGI	PMID:16541076	ComplexPortal:CPX-1134	9606		20170626	P		UniProtKB	P05067:PRO_0000000092	APP	part_of	GO:0005622	intracellular	ECO:0000314	IDA	PMID:16541076		9606		20170208	C
UniProtKB	P05067:PRO_0000000092	APP	part_of	GO:0005615	extracellular space	ECO:0000314	IDA	PMID:16541076		9606		20170626	C		UniProtKB	P05067:PRO_0000000094	APP	part_of	GO:0016020	membrane	ECO:0000314	IDA	PMID:16541076		9606		20170208	C
UniProtKB	P05067:PRO_0000000092	APP	involved_in	GO:0090647	modulation of age-related behavioral decline	ECO:0000304	TAS	PMID:16541076		9606		20170628	P		UniProtKB	P05067:PRO_0000384574	APP	part_of	GO:0016020	membrane	ECO:0000314	IDA	PMID:16541076		9606		20170208	C
UniProtKB	P05067:PRO_0000000092	APP	NOT|involved_in	GO:0007268	chemical synaptic transmission	ECO:0000314	IDA	PMID:18216187		9606		20170523	P		UniProtKB	P05067:PRO_0000000092	APP	involved_in	GO:0007613	memory	ECO:0000316	IGI	PMID:16541076	ComplexPortal:CPX-1134	9606		20170626	P
UniProtKB	P05067:PRO_0000000092	APP	enables	GO:0005109	frizzled binding	ECO:0000353	IPI	PMID:18234671	UniProtKB:Q13467|UniProtKB:Q9ULV1	9606		20170505	F		UniProtKB	P05067:PRO_0000000092	APP	part_of	GO:0005615	extracellular space	ECO:0000314	IDA	PMID:16541076		9606		20170626	C
UniProtKB	P05067:PRO_0000000092	APP	enables	GO:0042803	protein homodimerization activity	ECO:0000353	IPI	PMID:18568035	UniProtKB:P05067:PRO_0000000092	9606		20170213	F		UniProtKB	P05067	APP	involved_in	GO:0090647	modulation of age-related behavioral decline	ECO:0000304	TAS	PMID:16541076		9606		20170628	P
UniProtKB	P05067:PRO_0000000092	APP	enables	GO:0046982	protein heterodimerization activity	ECO:0000353	IPI	PMID:18568035	UniProtKB:P05067:PRO_0000000093	9606		20170213	F		UniProtKB	P05067:PRO_0000000092	APP	involved_in	GO:0090647	modulation of age-related behavioral decline	ECO:0000304	TAS	PMID:16541076		9606		20170628	P
UniProtKB	P05067:PRO_0000000092	APP	part_of	GO:0032991	protein-containing complex	ECO:0000353	IPI	PMID:18568035	UniProtKB:P05067:PRO_0000000092|UniProtKB:P05067:PRO_0000000093	9606		20170307	C		UniProtKB	P05067:PRO_0000000093	APP	involved_in	GO:0090647	modulation of age-related behavioral decline	ECO:0000304	TAS	PMID:16541076		9606		20170628	P
UniProtKB	P05067:PRO_0000000092	APP	involved_in	GO:0001774	microglial cell activation	ECO:0000316	IGI	PMID:18723082	UniProtKB:F1M670	9606		20170613	P		UniProtKB	P05067:PRO_0000000093	APP	NOT|colocalizes_with	GO:0030425	dendrite	ECO:0000314	IDA	PMID:17251419		9606		20170628	C
UniProtKB	P05067:PRO_0000000092	APP	involved_in	GO:0048143	astrocyte activation	ECO:0000316	IGI	PMID:18723082	UniProtKB:F1M670	9606		20170613	P		UniProtKB	P05067:PRO_0000000093	APP	NOT|colocalizes_with	GO:0097060	synaptic membrane	ECO:0000314	IDA	PMID:17308309		9606		20170406	C
UniProtKB	P05067:PRO_0000000092	APP	involved_in	GO:0070374	positive regulation of ERK1 and ERK2 cascade	ECO:0000316	IGI	PMID:18723082	UniProtKB:F1M670	9606	regulates_o_occurs_in(CL:0000129)|regulates_o_occurs_in(CL:0000127)	20170613	P		UniProtKB	P05067	APP	involved_in	GO:2000310	regulation of NMDA receptor activity	ECO:0000304	TAS	PMID:17360908		9606	regulates_o_occurs_in(CL:0002609)	20170217	P
UniProtKB	P05067:PRO_0000000092	APP	part_of	GO:0005737	cytoplasm	ECO:0000314	IDA	PMID:18723082		9606	part_of(CL:0000129)|part_of(CL:0000127)	20170613	C		UniProtKB	P05067:PRO_0000000092	APP	NOT|involved_in	GO:0007268	chemical synaptic transmission	ECO:0000314	IDA	PMID:18216187		9606		20170523	P
UniProtKB	P05067:PRO_0000000092	APP	involved_in	GO:0061903	positive regulation of 1-phosphatidylinositol-3-kinase activity	ECO:0000316	IGI	PMID:18723082	UniProtKB:F1M670	9606	regulates_o_occurs_in(CL:0000129),positively_regulates(GO:0070371)|regulates_o_occurs_in(CL:0000127),positively_regulates(GO:0070371)	20170703	P		UniProtKB	P05067:PRO_0000000092	APP	enables	GO:0005109	frizzled binding	ECO:0000353	IPI	PMID:18234671	UniProtKB:Q13467|UniProtKB:Q9ULV1	9606		20170505	F
UniProtKB	P05067:PRO_0000000092	APP	involved_in	GO:0007193	adenylate cyclase-inhibiting G-protein coupled receptor signaling pathway	ECO:0000316	IGI	PMID:18723082	UniProtKB:F1M670	9606	regulates_o_occurs_in(CL:0000129)|regulates_o_occurs_in(CL:0000127)	20171117	P		UniProtKB	P05067:PRO_0000000093	APP	enables	GO:0005109	frizzled binding	ECO:0000353	IPI	PMID:18234671	UniProtKB:Q13467|UniProtKB:Q9ULV1	9606		20170505	F
UniProtKB	P05067:PRO_0000000092	APP	involved_in	GO:1904022	positive regulation of G-protein coupled receptor internalization	ECO:0000314	IDA	PMID:18723082		9606	regulates_o_occurs_in(CL:0000129),has_regulation_target(UniProtKB:P25090)|regulates_o_occurs_in(CL:0000127),has_regulation_target(UniProtKB:P25090)	20171117	P		UniProtKB	P05067:PRO_0000000093	APP	involved_in	GO:0010629	negative regulation of gene expression	ECO:0000316	IGI	PMID:18234671	UniProtKB:P56704	9606	occurs_in(CL:0000540),regulates_expression_of(ENSEMBL:ENSG00000110092),part_of(GO:0090090)	20170505	P
UniProtKB	P05067:PRO_0000000092	APP	enables	GO:0030549	acetylcholine receptor activator activity	ECO:0000304	TAS	PMID:19118188		9606		20170424	F		UniProtKB	P05067:PRO_0000000093	APP	involved_in	GO:0010629	negative regulation of gene expression	ECO:0000316	IGI	PMID:18234671	UniProtKB:P56704	9606	occurs_in(CL:0000540),regulates_expression_of(ENSEMBL:ENSG00000138795),part_of(GO:0090090)	20170505	P
UniProtKB	P05067:PRO_0000000092	APP	involved_in	GO:0007611	learning or memory	ECO:0000316	IGI	PMID:19118188	ComplexPortal:CPX-1134,UniProtKB:P49582	9606	occurs_in(UBERON:0002421),happens_during(GO:1903048)	20170614	P		UniProtKB	P05067:PRO_0000000093	APP	involved_in	GO:0010629	negative regulation of gene expression	ECO:0000316	IGI	PMID:18234671	UniProtKB:P56704	9606	occurs_in(CL:0000540),regulates_expression_of(ENSEMBL:ENSG00000168646),part_of(GO:0090090)	20170505	P
UniProtKB	P05067:PRO_0000000092	APP	involved_in	GO:0007613	memory	ECO:0000316	IGI	PMID:19118188	ComplexPortal:CPX-1134	9606	occurs_in(UBERON:0002421)	20170614	P		UniProtKB	P05067:PRO_0000000093	APP	involved_in	GO:0090090	negative regulation of canonical Wnt signaling pathway	ECO:0000314	IDA	PMID:18234671		9606	occurs_in(CL:0000540)	20170505	P
UniProtKB	P05067:PRO_0000000092	APP	involved_in	GO:0008306	associative learning	ECO:0000316	IGI	PMID:19118188	ComplexPortal:CPX-1134	9606	occurs_in(UBERON:0002421)	20170614	P		UniProtKB	P05067:PRO_0000000093	APP	involved_in	GO:1900181	negative regulation of protein localization to nucleus	ECO:0000316	IGI	PMID:18234671	UniProtKB:P56704	9606	occurs_in(CL:0000540),has_regulation_target(UniProtKB:P35222)	20170505	P
UniProtKB	P05067:PRO_0000000092	APP	involved_in	GO:1900272	negative regulation of long-term synaptic potentiation	ECO:0000316	IGI	PMID:19118188	ComplexPortal:CPX-1134	9606	occurs_in(UBERON:0003881)	20170614	P		UniProtKB	P05067:PRO_0000000092	APP	enables	GO:0042803	protein homodimerization activity	ECO:0000353	IPI	PMID:18568035	UniProtKB:P05067:PRO_0000000092	9606		20170213	F
UniProtKB	P05067:PRO_0000000092	APP	involved_in	GO:1900273	positive regulation of long-term synaptic potentiation	ECO:0000316	IGI	PMID:19118188	ComplexPortal:CPX-1134	9606	occurs_in(UBERON:0003881)	20170614	P		UniProtKB	P05067:PRO_0000000092	APP	enables	GO:0046982	protein heterodimerization activity	ECO:0000353	IPI	PMID:18568035	UniProtKB:P05067:PRO_0000000093	9606		20170213	F
UniProtKB	P05067:PRO_0000000092	APP	involved_in	GO:1900273	positive regulation of long-term synaptic potentiation	ECO:0000316	IGI	PMID:19118188	ComplexPortal:CPX-1134,UniProtKB:P49582	9606	occurs_in(UBERON:0002421),happens_during(GO:1903048)	20170614	P		UniProtKB	P05067:PRO_0000000093	APP	enables	GO:0046982	protein heterodimerization activity	ECO:0000353	IPI	PMID:18568035	UniProtKB:P05067:PRO_0000000092	9606		20170213	F
UniProtKB	P05067:PRO_0000000092	APP	involved_in	GO:2000463	positive regulation of excitatory postsynaptic potential	ECO:0000316	IGI	PMID:19118188	ComplexPortal:CPX-1134,UniProtKB:P49582	9606	occurs_in(UBERON:0002421),happens_during(GO:1903048)	20170614	P		UniProtKB	P05067:PRO_0000000092	APP	part_of	GO:0032991	protein-containing complex	ECO:0000353	IPI	PMID:18568035	UniProtKB:P05067:PRO_0000000092|UniProtKB:P05067:PRO_0000000093	9606		20170307	C
UniProtKB	P05067:PRO_0000000092	APP	NOT|involved_in	GO:0010996	response to auditory stimulus	ECO:0000316	IGI	PMID:19118188	ComplexPortal:CPX-1134	9606		20170614	P		UniProtKB	P05067:PRO_0000000093	APP	part_of	GO:0032991	protein-containing complex	ECO:0000353	IPI	PMID:18568035	UniProtKB:P05067:PRO_0000000092	9606		20170307	C
UniProtKB	P05067:PRO_0000000092	APP	involved_in	GO:1903048	regulation of acetylcholine-gated cation channel activity	ECO:0000316	IGI	PMID:19118188	ComplexPortal:CPX-1134,UniProtKB:P49582	9606	occurs_in(UBERON:0002421),has_regulation_target(UniProtKB:P49582),part_of(GO:1900273)	20180223	P		UniProtKB	P05067:PRO_0000000092	APP	involved_in	GO:0001774	microglial cell activation	ECO:0000316	IGI	PMID:18723082	UniProtKB:F1M670	9606		20170613	P
UniProtKB	P05067:PRO_0000000092	APP	enables	GO:0005158	insulin receptor binding	ECO:0000353	IPI	PMID:19406747	UniProtKB:P06213	9606	part_of(GO:0008286)	20170720	F		UniProtKB	P05067:PRO_0000000092	APP	involved_in	GO:0048143	astrocyte activation	ECO:0000316	IGI	PMID:18723082	UniProtKB:F1M670	9606		20170613	P
UniProtKB	P05067:PRO_0000000092	APP	enables	GO:0046983	protein dimerization activity	ECO:0000315	IMP	PMID:19660551		9606	occurs_in(UBERON:0000955),part_of(GO:0007568),has_output(ComplexPortal:CPX-1120),has_output(ComplexPortal:CPX-1062),has_input(UniProtKB:P05067:PRO_0000000093)	20170710	F		UniProtKB	P05067:PRO_0000000092	APP	involved_in	GO:0070374	positive regulation of ERK1 and ERK2 cascade	ECO:0000316	IGI	PMID:18723082	UniProtKB:F1M670	9606	regulates_o_occurs_in(CL:0000129)|regulates_o_occurs_in(CL:0000127)	20170613	P
UniProtKB	P05067:PRO_0000000092	APP	involved_in	GO:0051262	protein tetramerization	ECO:0000315	IMP	PMID:19660551		9606	occurs_in(UBERON:0000955),part_of(GO:0007568),has_input(UniProtKB:P05067:PRO_0000000093),has_output(ComplexPortal:CPX-1120),has_output(ComplexPortal:CPX-1062)	20170710	P		UniProtKB	P05067:PRO_0000000092	APP	part_of	GO:0005737	cytoplasm	ECO:0000314	IDA	PMID:18723082		9606	part_of(CL:0000129)|part_of(CL:0000127)	20170613	C
UniProtKB	P05067:PRO_0000000092	APP	involved_in	GO:0070206	protein trimerization	ECO:0000315	IMP	PMID:19660551		9606	occurs_in(UBERON:0000955),part_of(GO:0007568),has_input(UniProtKB:P05067:PRO_0000000093),has_output(ComplexPortal:CPX-1120),has_output(ComplexPortal:CPX-1062)	20170710	P		UniProtKB	P05067:PRO_0000000092	APP	involved_in	GO:0061903	positive regulation of 1-phosphatidylinositol-3-kinase activity	ECO:0000316	IGI	PMID:18723082	UniProtKB:F1M670	9606	regulates_o_occurs_in(CL:0000129),positively_regulates(GO:0070371)|regulates_o_occurs_in(CL:0000127),positively_regulates(GO:0070371)	20170703	P
UniProtKB	P05067:PRO_0000000092	APP	NOT|colocalizes_with	GO:0032590	dendrite membrane	ECO:0000304	TAS	PMID:20032460		9606		20170628	C		UniProtKB	P05067:PRO_0000000092	APP	involved_in	GO:0007193	adenylate cyclase-inhibiting G-protein coupled receptor signaling pathway	ECO:0000316	IGI	PMID:18723082	UniProtKB:F1M670	9606	regulates_o_occurs_in(CL:0000129)|regulates_o_occurs_in(CL:0000127)	20171117	P
UniProtKB	P05067:PRO_0000000092	APP	involved_in	GO:0010628	positive regulation of gene expression	ECO:0000316	IGI	PMID:20037584	UniProtKB:P22366|UniProtKB:Q9EPW9|UniProtKB:Q9QUK6	9606	regulates_o_occurs_in(CL:0000129),regulates_expression_of(ENSEMBL:ENSMUSG00000027398)	20170517	P		UniProtKB	P05067:PRO_0000000092	APP	involved_in	GO:1904022	positive regulation of G-protein coupled receptor internalization	ECO:0000314	IDA	PMID:18723082		9606	regulates_o_occurs_in(CL:0000129),has_regulation_target(UniProtKB:P25090)|regulates_o_occurs_in(CL:0000127),has_regulation_target(UniProtKB:P25090)	20171117	P
UniProtKB	P05067:PRO_0000000092	APP	involved_in	GO:0010628	positive regulation of gene expression	ECO:0000316	IGI	PMID:20037584	UniProtKB:Q80UF7|UniProtKB:Q9EPW9|UniProtKB:Q9QUK6	9606	regulates_o_occurs_in(CL:0000129),regulates_expression_of(ENSEMBL:ENSMUSG00000035042)	20170517	P		UniProtKB	P05067:PRO_0000000092	APP	enables	GO:0030549	acetylcholine receptor activator activity	ECO:0000304	TAS	PMID:19118188		9606		20170424	F
UniProtKB	P05067:PRO_0000000092	APP	involved_in	GO:0034121	regulation of toll-like receptor signaling pathway	ECO:0000316	IGI	PMID:20037584	UniProtKB:P16671	9606	has_regulation_target(UniProtKB:O00206),has_regulation_target(UniProtKB:Q9Y2C9)	20170517	P		UniProtKB	P12023	App	involved_in	GO:0007613	memory	ECO:0000304	TAS	PMID:19118188		10090		20170424	P
UniProtKB	P05067:PRO_0000000092	APP	involved_in	GO:0045429	positive regulation of nitric oxide biosynthetic process	ECO:0000316	IGI	PMID:20037584	UniProtKB:O00206	9606	regulates_o_occurs_in(CL:0000129),positively_regulates(GO:0070997)	20170517	P		UniProtKB	P12023	App	involved_in	GO:0060291	long-term synaptic potentiation	ECO:0000304	TAS	PMID:19118188		10090		20170424	P
UniProtKB	P05067:PRO_0000000092	APP	involved_in	GO:0045429	positive regulation of nitric oxide biosynthetic process	ECO:0000316	IGI	PMID:20037584	UniProtKB:O00206,UniProtKB:P16671,UniProtKB:Q9Y2C9	9606	regulates_o_occurs_in(CL:0000129),positively_regulates(GO:0070997)	20170517	P		UniProtKB	P05067:PRO_0000000092	APP	involved_in	GO:0007611	learning or memory	ECO:0000316	IGI	PMID:19118188	ComplexPortal:CPX-1134,UniProtKB:P49582	9606	occurs_in(UBERON:0002421),happens_during(GO:1903048)	20170614	P
UniProtKB	P05067:PRO_0000000092	APP	involved_in	GO:0045429	positive regulation of nitric oxide biosynthetic process	ECO:0000316	IGI	PMID:20037584	UniProtKB:P16671	9606	regulates_o_occurs_in(CL:0000129),positively_regulates(GO:0070997)	20170517	P		UniProtKB	P05067:PRO_0000000092	APP	involved_in	GO:0007613	memory	ECO:0000316	IGI	PMID:19118188	ComplexPortal:CPX-1134	9606	occurs_in(UBERON:0002421)	20170614	P
UniProtKB	P05067:PRO_0000000092	APP	involved_in	GO:0051092	positive regulation of NF-kappaB transcription factor activity	ECO:0000316	IGI	PMID:20037584	UniProtKB:O00206,UniProtKB:P16671,UniProtKB:Q9Y2C9	9606		20170517	P		UniProtKB	P05067:PRO_0000000092	APP	involved_in	GO:0008306	associative learning	ECO:0000316	IGI	PMID:19118188	ComplexPortal:CPX-1134	9606	occurs_in(UBERON:0002421)	20170614	P
UniProtKB	P05067:PRO_0000000092	APP	involved_in	GO:1900122	positive regulation of receptor binding	ECO:0000314	IDA	PMID:20037584		9606	has_regulation_target(UniProtKB:O00206),has_regulation_target(UniProtKB:P16671),has_regulation_target(UniProtKB:Q9Y2C9),occurs_in(CL:0000576)	20170517	P		UniProtKB	P05067:PRO_0000000092	APP	involved_in	GO:1900272	negative regulation of long-term synaptic potentiation	ECO:0000316	IGI	PMID:19118188	ComplexPortal:CPX-1134	9606	occurs_in(UBERON:0003881)	20170614	P
UniProtKB	P05067:PRO_0000000092	APP	involved_in	GO:1903223	positive regulation of oxidative stress-induced neuron death	ECO:0000316	IGI	PMID:20037584	UniProtKB:Q9EPW9|UniProtKB:Q9QUK6	9606	regulates_o_occurs_in(CL:0000540),occurs_in(CL:0000129)	20170517	P		UniProtKB	P05067:PRO_0000000092	APP	involved_in	GO:1900273	positive regulation of long-term synaptic potentiation	ECO:0000316	IGI	PMID:19118188	ComplexPortal:CPX-1134	9606	occurs_in(UBERON:0003881)	20170614	P
UniProtKB	P05067:PRO_0000000092	APP	involved_in	GO:0001934	positive regulation of protein phosphorylation	ECO:0000316	IGI	PMID:20141570	UniProtKB:F1M670	9606	regulates_o_occurs_in(CL:0000127)|regulates_o_occurs_in(CL:0000129)	20170531	P		UniProtKB	P05067:PRO_0000000092	APP	involved_in	GO:1900273	positive regulation of long-term synaptic potentiation	ECO:0000316	IGI	PMID:19118188	ComplexPortal:CPX-1134,UniProtKB:P49582	9606	occurs_in(UBERON:0002421),happens_during(GO:1903048)	20170614	P
UniProtKB	P05067:PRO_0000000092	APP	involved_in	GO:0001934	positive regulation of protein phosphorylation	ECO:0000316	IGI	PMID:20141570	UniProtKB:P25090,UniProtKB:Q9UEW3	9606		20170531	P		UniProtKB	P05067:PRO_0000000092	APP	involved_in	GO:2000463	positive regulation of excitatory postsynaptic potential	ECO:0000316	IGI	PMID:19118188	ComplexPortal:CPX-1134,UniProtKB:P49582	9606	occurs_in(UBERON:0002421),happens_during(GO:1903048)	20170614	P
UniProtKB	P05067:PRO_0000000092	APP	involved_in	GO:0070374	positive regulation of ERK1 and ERK2 cascade	ECO:0000316	IGI	PMID:20141570	UniProtKB:F1M670	9606	regulates_o_occurs_in(CL:0000127)|regulates_o_occurs_in(CL:0000129)	20170531	P		UniProtKB	P05067:PRO_0000000092	APP	NOT|involved_in	GO:0010996	response to auditory stimulus	ECO:0000316	IGI	PMID:19118188	ComplexPortal:CPX-1134	9606		20170614	P
UniProtKB	P05067:PRO_0000000092	APP	involved_in	GO:0070374	positive regulation of ERK1 and ERK2 cascade	ECO:0000316	IGI	PMID:20141570	UniProtKB:P25090,UniProtKB:Q9UEW3	9606	part_of(GO:0001934)	20170531	P		UniProtKB	P05067:PRO_0000000092	APP	involved_in	GO:1903048	regulation of acetylcholine-gated cation channel activity	ECO:0000316	IGI	PMID:19118188	ComplexPortal:CPX-1134,UniProtKB:P49582	9606	occurs_in(UBERON:0002421),has_regulation_target(UniProtKB:P49582),part_of(GO:1900273)	20180223	P
UniProtKB	P05067:PRO_0000000092	APP	involved_in	GO:1900122	positive regulation of receptor binding	ECO:0000314	IDA	PMID:20141570		9606	occurs_in(CL:0000127),occurs_in(GO:0016020),has_regulation_target(UniProtKB:F1M670),has_regulation_target(UniProtKB:M0R9F7)|occurs_in(CL:0000129),occurs_in(GO:0016020),has_regulation_target(UniProtKB:F1M670),has_regulation_target(UniProtKB:M0R9F7)	20170531	P		UniProtKB	P05067:PRO_0000000092	APP	enables	GO:0005158	insulin receptor binding	ECO:0000353	IPI	PMID:19406747	UniProtKB:P06213	9606	part_of(GO:0008286)	20170720	F
UniProtKB	P05067:PRO_0000000092	APP	involved_in	GO:0007193	adenylate cyclase-inhibiting G-protein coupled receptor signaling pathway	ECO:0000316	IGI	PMID:20141570	UniProtKB:F1M670	9606	regulates_o_occurs_in(CL:0000127)|regulates_o_occurs_in(CL:0000129)	20171117	P		UniProtKB	P05067	APP	involved_in	GO:0050808	synapse organization	ECO:0000316	IGI	PMID:19587288	UniProtKB:P49582	9606	occurs_in(UBERON:0001870),happens_during(UBERON:0007222),has_input(UniProtKB:P36544)|occurs_in(UBERON:0002421),happens_during(UBERON:0007222),has_input(UniProtKB:P36544)	20170110	P
UniProtKB	P05067:PRO_0000000092	APP	involved_in	GO:0007193	adenylate cyclase-inhibiting G-protein coupled receptor signaling pathway	ECO:0000316	IGI	PMID:20141570	UniProtKB:P25090,UniProtKB:Q9UEW3	9606		20171117	P		UniProtKB	P05067	APP	involved_in	GO:0007611	learning or memory	ECO:0000316	IGI	PMID:19587288	UniProtKB:P49582	9606	has_input(UniProtKB:P36544),happens_during(UBERON:0007222)	20170111	P
UniProtKB	P05067:PRO_0000000092	APP	enables	GO:0046875	ephrin receptor binding	ECO:0000353	IPI	PMID:21113149	UniProtKB:P54763	9606		20170620	F		UniProtKB	P05067	APP	involved_in	GO:0010800	positive regulation of peptidyl-threonine phosphorylation	ECO:0000315	IMP	PMID:19660551		9606	occurs_in(UBERON:0002421),part_of(GO:0007568),has_input(UniProtKB:P10636)|occurs_in(UBERON:0000956),part_of(GO:0007568),has_input(UniProtKB:P10636)	20170710	P
UniProtKB	P05067:PRO_0000000092	APP	colocalizes_with	GO:0005764	lysosome	ECO:0000314	IDA	PMID:21289173		9606		20170503	C		UniProtKB	P05067	APP	involved_in	GO:0033138	positive regulation of peptidyl-serine phosphorylation	ECO:0000315	IMP	PMID:19660551		9606	occurs_in(UBERON:0002421),part_of(GO:0007568),has_input(UniProtKB:P10636)|occurs_in(UBERON:0000956),part_of(GO:0007568),has_input(UniProtKB:P10636)	20170710	P
UniProtKB	P05067:PRO_0000000092	APP	enables	GO:0043395	heparan sulfate proteoglycan binding	ECO:0000315	IMP	PMID:21289173		9606		20170503	F		UniProtKB	P05067	APP	involved_in	GO:1905908	positive regulation of amyloid fibril formation	ECO:0000315	IMP	PMID:19660551		9606	occurs_in(UBERON:0002421),part_of(GO:0007568)|occurs_in(UBERON:0000956),part_of(GO:0007568)	20170710	P
UniProtKB	P05067:PRO_0000000092	APP	enables	GO:1904399	heparan sulfate binding	ECO:0000304	TAS	PMID:21289173		9606		20170503	F		UniProtKB	P05067	APP	involved_in	GO:2000406	positive regulation of T cell migration	ECO:0000315	IMP	PMID:19660551		9606	occurs_in(UBERON:0002421),part_of(GO:0007568),regulates_o_occurs_in(CL:0000813)|occurs_in(UBERON:0000956),part_of(GO:0007568),regulates_o_occurs_in(CL:0000813)	20170710	P
UniProtKB	P05067:PRO_0000000092	APP	NOT|involved_in	GO:1902514	regulation of calcium ion transmembrane transport via high voltage-gated calcium channel	ECO:0000314	IDA	PMID:21883149		9606		20170523	P		UniProtKB	P05067:PRO_0000000092	APP	enables	GO:0046983	protein dimerization activity	ECO:0000315	IMP	PMID:19660551		9606	occurs_in(UBERON:0000955),part_of(GO:0007568),has_output(ComplexPortal:CPX-1120),has_output(ComplexPortal:CPX-1062),has_input(UniProtKB:P05067:PRO_0000000093)	20170710	F
UniProtKB	P05067:PRO_0000000092	APP	enables	GO:0034185	apolipoprotein binding	ECO:0000353	IPI	PMID:22138302	UniProtKB:P02649	9606	occurs_in(UBERON:0001359)	20170502	F		UniProtKB	P05067:PRO_0000000092	APP	involved_in	GO:0051262	protein tetramerization	ECO:0000315	IMP	PMID:19660551		9606	occurs_in(UBERON:0000955),part_of(GO:0007568),has_input(UniProtKB:P05067:PRO_0000000093),has_output(ComplexPortal:CPX-1120),has_output(ComplexPortal:CPX-1062)	20170710	P
UniProtKB	P05067:PRO_0000000092	APP	enables	GO:0046983	protein dimerization activity	ECO:0000314	IDA	PMID:22138302		9606		20170502	F		UniProtKB	P05067:PRO_0000000092	APP	involved_in	GO:0070206	protein trimerization	ECO:0000315	IMP	PMID:19660551		9606	occurs_in(UBERON:0000955),part_of(GO:0007568),has_input(UniProtKB:P05067:PRO_0000000093),has_output(ComplexPortal:CPX-1120),has_output(ComplexPortal:CPX-1062)	20170710	P
UniProtKB	P05067:PRO_0000000092	APP	part_of	GO:1990777	lipoprotein particle	ECO:0000314	IDA	PMID:22138302		9606	part_of(UBERON:0001359)	20170502	C		UniProtKB	P05067:PRO_0000000093	APP	enables	GO:0046983	protein dimerization activity	ECO:0000315	IMP	PMID:19660551		9606	occurs_in(UBERON:0000955),part_of(GO:0007568),has_output(ComplexPortal:CPX-1120),has_output(ComplexPortal:CPX-1062),has_input(UniProtKB:P05067:PRO_0000000092)	20170710	F
UniProtKB	P05067:PRO_0000000092	APP	enables	GO:0097645	amylin binding	ECO:0000304	TAS	PMID:22500019		9606		20170524	F		UniProtKB	P05067:PRO_0000000093	APP	involved_in	GO:0051262	protein tetramerization	ECO:0000315	IMP	PMID:19660551		9606	occurs_in(UBERON:0000955),part_of(GO:0007568),has_input(UniProtKB:P05067:PRO_0000000092),has_output(ComplexPortal:CPX-1120),has_output(ComplexPortal:CPX-1062)	20170710	P
UniProtKB	P05067:PRO_0000000092	APP	involved_in	GO:0007204	positive regulation of cytosolic calcium ion concentration	ECO:0000303	NAS	PMID:22500019		9606		20170524	P		UniProtKB	P05067:PRO_0000000093	APP	involved_in	GO:0070206	protein trimerization	ECO:0000315	IMP	PMID:19660551		9606	occurs_in(UBERON:0000955),part_of(GO:0007568),has_input(UniProtKB:P05067:PRO_0000000092),has_output(ComplexPortal:CPX-1120),has_output(ComplexPortal:CPX-1062)	20170710	P
UniProtKB	P05067:PRO_0000000092	APP	involved_in	GO:0010739	positive regulation of protein kinase A signaling	ECO:0000303	NAS	PMID:22500019		9606		20170524	P		UniProtKB	P05067	APP	NOT|involved_in	GO:1905598	negative regulation of low-density lipoprotein receptor activity	ECO:0000316	IGI	PMID:20005821	UniProtKB:P35951,UniProtKB:P49768	9606		20170601	P
UniProtKB	P05067:PRO_0000000092	APP	involved_in	GO:0010823	negative regulation of mitochondrion organization	ECO:0000304	TAS	PMID:22500019		9606		20170524	P		UniProtKB	P05067:PRO_0000000097	APP	involved_in	GO:0010629	negative regulation of gene expression	ECO:0000304	TAS	PMID:20005821		9606	regulates_expression_of(ENSEMBL:ENSG00000123384),causally_upstream_of(GO:0048259)	20170601	P
UniProtKB	P05067:PRO_0000000092	APP	involved_in	GO:0043065	positive regulation of apoptotic process	ECO:0000304	TAS	PMID:22500019		9606		20170524	P		UniProtKB	P05067:PRO_0000000097	APP	involved_in	GO:0051247	positive regulation of protein metabolic process	ECO:0000304	TAS	PMID:20005821		9606	has_input(UniProtKB:P02649)	20170601	P
UniProtKB	P05067:PRO_0000000092	APP	involved_in	GO:0043410	positive regulation of MAPK cascade	ECO:0000303	NAS	PMID:22500019		9606		20170524	P		UniProtKB	P05067:PRO_0000000097	APP	part_of	GO:0005622	intracellular	ECO:0000303	NAS	PMID:20005821		9606		20170601	C
UniProtKB	P05067:PRO_0000000092	APP	involved_in	GO:0051260	protein homooligomerization	ECO:0000304	TAS	PMID:22500019		9606		20170524	P		UniProtKB	P05067:PRO_0000000092	APP	NOT|colocalizes_with	GO:0032590	dendrite membrane	ECO:0000304	TAS	PMID:20032460		9606		20170628	C
UniProtKB	P05067:PRO_0000000092	APP	involved_in	GO:0051897	positive regulation of protein kinase B signaling	ECO:0000303	NAS	PMID:22500019		9606		20170524	P		UniProtKB	P05067:PRO_0000000093	APP	NOT|colocalizes_with	GO:0032590	dendrite membrane	ECO:0000304	TAS	PMID:20032460		9606		20170628	C
UniProtKB	P05067:PRO_0000000092	APP	NOT|involved_in	GO:0050731	positive regulation of peptidyl-tyrosine phosphorylation	ECO:0000314	IDA	PMID:22635104		9606		20170906	P		UniProtKB	P05067:PRO_0000000092	APP	involved_in	GO:0010628	positive regulation of gene expression	ECO:0000316	IGI	PMID:20037584	UniProtKB:P22366|UniProtKB:Q9EPW9|UniProtKB:Q9QUK6	9606	regulates_o_occurs_in(CL:0000129),regulates_expression_of(ENSEMBL:ENSMUSG00000027398)	20170517	P
UniProtKB	P05067:PRO_0000000092	APP	colocalizes_with	GO:0005764	lysosome	ECO:0000314	IDA	PMID:23152628		9606	part_of(CL:0002590)	20170503	C		UniProtKB	P05067:PRO_0000000092	APP	involved_in	GO:0010628	positive regulation of gene expression	ECO:0000316	IGI	PMID:20037584	UniProtKB:Q80UF7|UniProtKB:Q9EPW9|UniProtKB:Q9QUK6	9606	regulates_o_occurs_in(CL:0000129),regulates_expression_of(ENSEMBL:ENSMUSG00000035042)	20170517	P
UniProtKB	P05067:PRO_0000000092	APP	involved_in	GO:0010628	positive regulation of gene expression	ECO:0000304	TAS	PMID:23164821		9606	regulates_expression_of(ENSEMBL:ENSG00000107984),regulates_o_occurs_in(CL:0000540),negatively_regulates(GO:0060070)	20170426	P		UniProtKB	P05067:PRO_0000000092	APP	involved_in	GO:0034121	regulation of toll-like receptor signaling pathway	ECO:0000316	IGI	PMID:20037584	UniProtKB:P16671	9606	has_regulation_target(UniProtKB:O00206),has_regulation_target(UniProtKB:Q9Y2C9)	20170517	P
UniProtKB	P05067:PRO_0000000092	APP	involved_in	GO:0010628	positive regulation of gene expression	ECO:0000316	IGI	PMID:23164821	UniProtKB:D3Z9J1	9606	regulates_o_occurs_in(CL:0002609),regulates_expression_of(ENSEMBL:ENSG00000166886)|regulates_o_occurs_in(CL:0002609),regulates_expression_of(ENSEMBL:ENSG00000155090)|regulates_o_occurs_in(CL:0002609),regulates_expression_of(ENSEMBL:ENSG00000110092)|regulates_o_occurs_in(CL:0002609),regulates_expression_of(ENSEMBL:ENSG00000170345)|regulates_o_occurs_in(CL:0002609),regulates_expression_of(ENSEMBL:E…	20170627	P		UniProtKB	P05067:PRO_0000000092	APP	involved_in	GO:0045429	positive regulation of nitric oxide biosynthetic process	ECO:0000316	IGI	PMID:20037584	UniProtKB:O00206	9606	regulates_o_occurs_in(CL:0000129),positively_regulates(GO:0070997)	20170517	P
UniProtKB	P05067:PRO_0000000092	APP	involved_in	GO:0010628	positive regulation of gene expression	ECO:0000316	IGI	PMID:23164821	UniProtKB:O94907	9606	regulates_o_occurs_in(CL:0002609),regulates_expression_of(ENSEMBL:ENSG00000166886)|regulates_o_occurs_in(CL:0002609),regulates_expression_of(ENSEMBL:ENSG00000155090)|regulates_o_occurs_in(CL:0002609),regulates_expression_of(ENSEMBL:ENSG00000110092)|regulates_o_occurs_in(CL:0002609),regulates_expression_of(ENSEMBL:ENSG00000170345)|regulates_o_occurs_in(CL:0002609),regulates_expression_of(ENSEMBL:E…	20170627	P		UniProtKB	P05067:PRO_0000000092	APP	involved_in	GO:0045429	positive regulation of nitric oxide biosynthetic process	ECO:0000316	IGI	PMID:20037584	UniProtKB:O00206,UniProtKB:P16671,UniProtKB:Q9Y2C9	9606	regulates_o_occurs_in(CL:0000129),positively_regulates(GO:0070997)	20170517	P
UniProtKB	P05067:PRO_0000000092	APP	involved_in	GO:0010628	positive regulation of gene expression	ECO:0000316	IGI	PMID:23164821	UniProtKB:P05371	9606	regulates_o_occurs_in(CL:0002609),regulates_expression_of(ENSEMBL:ENSRNOG00000011692)|regulates_o_occurs_in(CL:0002609),regulates_expression_of(ENSEMBL:ENSRNOG00000008415)|regulates_o_occurs_in(CL:0002609),regulates_expression_of(ENSEMBL:ENSRNOG00000006118)|regulates_o_occurs_in(CL:0002609),regulates_expression_of(ENSEMBL:ENSRNOG00000020918)|regulates_o_occurs_in(CL:0002609),regulates_expression_…	20170627	P		UniProtKB	P05067:PRO_0000000092	APP	involved_in	GO:0045429	positive regulation of nitric oxide biosynthetic process	ECO:0000316	IGI	PMID:20037584	UniProtKB:P16671	9606	regulates_o_occurs_in(CL:0000129),positively_regulates(GO:0070997)	20170517	P
UniProtKB	P05067:PRO_0000000092	APP	involved_in	GO:0010628	positive regulation of gene expression	ECO:0000316	IGI	PMID:23164821	UniProtKB:P10361	9606	regulates_o_occurs_in(CL:0002609),regulates_expression_of(ENSEMBL:ENSRNOG00000008015)|regulates_o_occurs_in(CL:0002609),regulates_expression_of(ENSEMBL:ENSRNOG00000019422)|regulates_o_occurs_in(CL:0002609),regulates_expression_of(ENSEMBL:ENSRNOG00000011692)	20170627	P		UniProtKB	P05067:PRO_0000000092	APP	involved_in	GO:0051092	positive regulation of NF-kappaB transcription factor activity	ECO:0000316	IGI	PMID:20037584	UniProtKB:O00206,UniProtKB:P16671,UniProtKB:Q9Y2C9	9606		20170517	P
UniProtKB	P05067:PRO_0000000092	APP	involved_in	GO:0010628	positive regulation of gene expression	ECO:0000316	IGI	PMID:23164821	UniProtKB:P10909	9606	regulates_expression_of(ENSEMBL:ENSRNOG00000011692),occurs_in(UBERON:0000956)	20170627	P		UniProtKB	P05067:PRO_0000000092	APP	involved_in	GO:1900122	positive regulation of receptor binding	ECO:0000314	IDA	PMID:20037584		9606	has_regulation_target(UniProtKB:O00206),has_regulation_target(UniProtKB:P16671),has_regulation_target(UniProtKB:Q9Y2C9),occurs_in(CL:0000576)	20170517	P
UniProtKB	P05067:PRO_0000000092	APP	involved_in	GO:1901216	positive regulation of neuron death	ECO:0000316	IGI	PMID:23164821	UniProtKB:P10909	9606	occurs_in(GO:0005622)	20170627	P		UniProtKB	P05067:PRO_0000000092	APP	involved_in	GO:1903223	positive regulation of oxidative stress-induced neuron death	ECO:0000316	IGI	PMID:20037584	UniProtKB:Q9EPW9|UniProtKB:Q9QUK6	9606	regulates_o_occurs_in(CL:0000540),occurs_in(CL:0000129)	20170517	P
UniProtKB	P05067:PRO_0000000092	APP	enables	GO:0042803	protein homodimerization activity	ECO:0000314	IDA	PMID:23386614		9606		20170222	F		UniProtKB	P05067:PRO_0000000092	APP	involved_in	GO:0001934	positive regulation of protein phosphorylation	ECO:0000316	IGI	PMID:20141570	UniProtKB:F1M670	9606	regulates_o_occurs_in(CL:0000127)|regulates_o_occurs_in(CL:0000129)	20170531	P
UniProtKB	P05067:PRO_0000000092	APP	involved_in	GO:0051260	protein homooligomerization	ECO:0000314	IDA	PMID:23386614		9606	has_input(UniProtKB:P05067)	20170222	P		UniProtKB	P05067:PRO_0000000092	APP	involved_in	GO:0001934	positive regulation of protein phosphorylation	ECO:0000316	IGI	PMID:20141570	UniProtKB:P25090,UniProtKB:Q9UEW3	9606		20170531	P
UniProtKB	P05067:PRO_0000000092	APP	part_of	GO:0106003	amyloid-beta complex	ECO:0000353	IPI	PMID:23386614	UniProtKB:P05067:PRO_0000000092	9606		20170626	C		UniProtKB	P05067:PRO_0000000092	APP	involved_in	GO:0070374	positive regulation of ERK1 and ERK2 cascade	ECO:0000316	IGI	PMID:20141570	UniProtKB:F1M670	9606	regulates_o_occurs_in(CL:0000127)|regulates_o_occurs_in(CL:0000129)	20170531	P
UniProtKB	P05067:PRO_0000000092	APP	part_of	GO:0005615	extracellular space	ECO:0000315	IMP	PMID:23640054		9606	part_of(UBERON:0000955),part_of(UBERON:0000913),part_of(GO:0106003)	20170710	C		UniProtKB	P05067:PRO_0000000092	APP	involved_in	GO:0070374	positive regulation of ERK1 and ERK2 cascade	ECO:0000316	IGI	PMID:20141570	UniProtKB:P25090,UniProtKB:Q9UEW3	9606	part_of(GO:0001934)	20170531	P
UniProtKB	P05067:PRO_0000000092	APP	part_of	GO:0106003	amyloid-beta complex	ECO:0000315	IMP	PMID:23640054		9606	part_of(UBERON:0000955),part_of(UBERON:0000913)	20170710	C		UniProtKB	P05067:PRO_0000000092	APP	involved_in	GO:1900122	positive regulation of receptor binding	ECO:0000314	IDA	PMID:20141570		9606	occurs_in(CL:0000127),occurs_in(GO:0016020),has_regulation_target(UniProtKB:F1M670),has_regulation_target(UniProtKB:M0R9F7)|occurs_in(CL:0000129),occurs_in(GO:0016020),has_regulation_target(UniProtKB:F1M670),has_regulation_target(UniProtKB:M0R9F7)	20170531	P
UniProtKB	P05067:PRO_0000000092	APP	enables	GO:0005102	signaling receptor binding	ECO:0000353	IPI	PMID:23921129	UniProtKB:P31994	9606		20170606	F		UniProtKB	P05067:PRO_0000000092	APP	involved_in	GO:0007193	adenylate cyclase-inhibiting G-protein coupled receptor signaling pathway	ECO:0000316	IGI	PMID:20141570	UniProtKB:F1M670	9606	regulates_o_occurs_in(CL:0000127)|regulates_o_occurs_in(CL:0000129)	20171117	P
UniProtKB	P05067:PRO_0000000092	APP	involved_in	GO:1901216	positive regulation of neuron death	ECO:0000316	IGI	PMID:23921129	ComplexPortal:CPX-1134	9606	regulates_o_occurs_in(CL:0002609),part_of(GO:1904646)	20170621	P		UniProtKB	P05067:PRO_0000000092	APP	involved_in	GO:0007193	adenylate cyclase-inhibiting G-protein coupled receptor signaling pathway	ECO:0000316	IGI	PMID:20141570	UniProtKB:P25090,UniProtKB:Q9UEW3	9606		20171117	P
UniProtKB	P05067:PRO_0000000092	APP	involved_in	GO:1902950	regulation of dendritic spine maintenance	ECO:0000316	IGI	PMID:23921129	ComplexPortal:CPX-1134	9606	occurs_in(CL:0002608),part_of(GO:1904646),regulates_o_occurs_in(CL:0002608)	20170621	P		UniProtKB	P05067	APP	involved_in	GO:0007611	learning or memory	ECO:0000316	IGI	PMID:20164328	UniProtKB:P49582	9606	has_input(UniProtKB:P36544),happens_during(UBERON:0018241)	20170111	P
UniProtKB	P05067:PRO_0000000092	APP	involved_in	GO:1904646	cellular response to amyloid-beta	ECO:0000316	IGI	PMID:23921129	ComplexPortal:CPX-1134	9606	occurs_in(CL:0002609)|occurs_in(CL:0002608)	20170621	P		UniProtKB	P05067	APP	part_of	GO:0005886	plasma membrane	ECO:0000314	IDA	PMID:20164328		9606	exists_during(UBERON:0018241),part_of(UBERON:0002421)	20170208	C
UniProtKB	P05067:PRO_0000000092	APP	part_of	GO:0031904	endosome lumen	ECO:0000304	TAS	PMID:24305806		9606	exists_during(GO:0034205)	20180111	C		UniProtKB	P05067:PRO_0000000089	APP	part_of	GO:0005615	extracellular space	ECO:0000314	IDA	PMID:20164328		9606	exists_during(UBERON:0018241),part_of(UBERON:0002421)	20170208	C
UniProtKB	P05067:PRO_0000000092	APP	involved_in	GO:0051044	positive regulation of membrane protein ectodomain proteolysis	ECO:0000314	IDA	PMID:25015123		9606	has_regulation_target(UniProtKB:P01130),regulates_o_occurs_in(CL:2000044)|has_regulation_target(UniProtKB:Q07954),regulates_o_occurs_in(CL:2000044)	20170704	P		UniProtKB	P05067:PRO_0000000094	APP	part_of	GO:0005886	plasma membrane	ECO:0000314	IDA	PMID:20164328		9606		20170208	C
UniProtKB	P05067:PRO_0000000092	APP	involved_in	GO:0051044	positive regulation of membrane protein ectodomain proteolysis	ECO:0000316	IGI	PMID:25015123	UniProtKB:P02649	9606	has_regulation_target(UniProtKB:P01130),regulates_o_occurs_in(CL:2000044)|has_regulation_target(UniProtKB:Q07954),regulates_o_occurs_in(CL:2000044)	20170704	P		UniProtKB	P05067:PRO_0000384574	APP	part_of	GO:0005886	plasma membrane	ECO:0000314	IDA	PMID:20164328		9606	exists_during(UBERON:0018241),part_of(UBERON:0002421)	20170208	C
UniProtKB	P05067:PRO_0000000092	APP	colocalizes_with	GO:0043005	neuron projection	ECO:0000314	IDA	PMID:25390368		9606	part_of(CL:0002608)	20170627	C		UniProtKB	P05067	APP	involved_in	GO:0007611	learning or memory	ECO:0000316	IGI	PMID:20445063	UniProtKB:P04156,UniProtKB:P49768	9606	part_of(GO:0090647),happens_during(GO:0007568)	20170509	P
UniProtKB	P05067:PRO_0000000092	APP	colocalizes_with	GO:0044297	cell body	ECO:0000314	IDA	PMID:25390368		9606	part_of(CL:0000125),part_of(UBERON:0002421)|part_of(CL:0002608)	20170627	C		UniProtKB	P05067	APP	involved_in	GO:0048143	astrocyte activation	ECO:0000316	IGI	PMID:20445063	UniProtKB:P49768	9606	occurs_in(UBERON:0000956)	20170509	P
UniProtKB	P05067:PRO_0000000092	APP	colocalizes_with	GO:0098793	presynapse	ECO:0000314	IDA	PMID:25390368		9606	part_of(CL:0000125),part_of(UBERON:0002421)|part_of(CL:0002608)	20170627	C		UniProtKB	P05067	APP	involved_in	GO:0090647	modulation of age-related behavioral decline	ECO:0000316	IGI	PMID:20445063	UniProtKB:P04156,UniProtKB:P49768	9606	happens_during(GO:0007568)	20170509	P
UniProtKB	P05067:PRO_0000000092	APP	colocalizes_with	GO:0098794	postsynapse	ECO:0000314	IDA	PMID:25390368		9606	part_of(CL:0000125),part_of(UBERON:0002421)|part_of(CL:0002608)	20170627	C		UniProtKB	P05067	APP	involved_in	GO:1990535	neuron projection maintenance	ECO:0000316	IGI	PMID:20445063	UniProtKB:P04156,UniProtKB:P49768	9606	occurs_in(CL:0000850),occurs_in(GO:0030424)	20170831	P
UniProtKB	P05067:PRO_0000000092	APP	part_of	GO:0005615	extracellular space	ECO:0000314	IDA	PMID:26005850		9606	part_of(UBERON:0000913)|part_of(UBERON:0001969)	20170518	C		UniProtKB	P05067	APP	involved_in	GO:0098815	modulation of excitatory postsynaptic potential	ECO:0000316	IGI	PMID:20974225	UniProtKB:P49582	9606	occurs_in(UBERON:0003881),happens_during(UBERON:0018241)	20170425	P
UniProtKB	P05067:PRO_0000000092	APP	involved_in	GO:0007611	learning or memory	ECO:0000316	IGI	PMID:26005850	UniProtKB:Q7M6Y3	9606		20170522	P		UniProtKB	P05067	APP	involved_in	GO:1900273	positive regulation of long-term synaptic potentiation	ECO:0000316	IGI	PMID:20974225	UniProtKB:P49582	9606	occurs_in(UBERON:0003881),happens_during(UBERON:0018241)	20170425	P
UniProtKB	P05067:PRO_0000000092	APP	involved_in	GO:0090647	modulation of age-related behavioral decline	ECO:0000316	IGI	PMID:26005850	UniProtKB:Q7M6Y3	9606		20170522	P		UniProtKB	P05067	APP	involved_in	GO:0007611	learning or memory	ECO:0000316	IGI	PMID:21113149	UniProtKB:P54763	9606	occurs_in(UBERON:0001885)	20170620	P
UniProtKB	P05067:PRO_0000000092	APP	NOT|involved_in	GO:1902003	regulation of amyloid-beta formation	ECO:0000316	IGI	PMID:26005850	UniProtKB:Q7M6Y3	9606		20170522	P		UniProtKB	P05067:PRO_0000000092	APP	enables	GO:0046875	ephrin receptor binding	ECO:0000353	IPI	PMID:21113149	UniProtKB:P54763	9606		20170620	F
UniProtKB	P05067:PRO_0000000092	APP	part_of	GO:0005769	early endosome	ECO:0000314	IDA	PMID:26005850		9606	part_of(CL:1001602)	20170522	C		UniProtKB	P05067:PRO_0000000093	APP	enables	GO:0005178	integrin binding	ECO:0000314	IDA	PMID:21126803		9606	occurs_in(CL:0000066),occurs_in(GO:0009897)	20170717	F
UniProtKB	P05067:PRO_0000000092	APP	part_of	GO:0070381	endosome to plasma membrane transport vesicle	ECO:0000314	IDA	PMID:26005850		9606	part_of(CL:1001602)	20170522	C		UniProtKB	P05067:PRO_0000000092	APP	colocalizes_with	GO:0005764	lysosome	ECO:0000314	IDA	PMID:21289173		9606		20170503	C
UniProtKB	P05067:PRO_0000000093	APP	involved_in	GO:1904591	positive regulation of protein import	ECO:0000250	ISS	GO_REF:0000024	UniProtKB:P05067:PRO_0000000093	9606	positively_regulates(GO:0098776),has_regulation_target(UniProtKB:P05371),occurs_in(CL:0002609)	20170627	P		UniProtKB	P05067:PRO_0000000092	APP	enables	GO:0043395	heparan sulfate proteoglycan binding	ECO:0000315	IMP	PMID:21289173		9606		20170503	F
UniProtKB	P05067:PRO_0000000093	APP	enables	GO:0050750	low-density lipoprotein particle receptor binding	ECO:0000250	ISS	GO_REF:0000024	UniProtKB:P12023:PRO_0000000119	9606		20170703	F		UniProtKB	P05067:PRO_0000000092	APP	enables	GO:1904399	heparan sulfate binding	ECO:0000304	TAS	PMID:21289173		9606		20170503	F
UniProtKB	P05067:PRO_0000000093	APP	enables	GO:0042803	protein homodimerization activity	ECO:0000314	IDA	PMID:15447668		9606		20170210	F		UniProtKB	P05067:PRO_0000000093	APP	enables	GO:0043395	heparan sulfate proteoglycan binding	ECO:0000315	IMP	PMID:21289173		9606		20170503	F
UniProtKB	P05067:PRO_0000000093	APP	involved_in	GO:0051260	protein homooligomerization	ECO:0000314	IDA	PMID:15447668		9606	has_input(UniProtKB:P05067:PRO_0000000093)	20170213	P		UniProtKB	P05067:PRO_0000000093	APP	enables	GO:1904399	heparan sulfate binding	ECO:0000304	TAS	PMID:21289173		9606		20170503	F
UniProtKB	P05067:PRO_0000000093	APP	colocalizes_with	GO:0009986	cell surface	ECO:0000303	NAS	PMID:15457210		9606		20170928	C		UniProtKB	P05067:PRO_0000000099	APP	involved_in	GO:0000122	negative regulation of transcription by RNA polymerase II	ECO:0000316	IGI	PMID:21803450	UniProtKB:O00213	9606	regulates_transcription_of(ENSEMBL:ENSG00000120885)	20170201	P
UniProtKB	P05067:PRO_0000000093	APP	involved_in	GO:0090647	modulation of age-related behavioral decline	ECO:0000304	TAS	PMID:16541076		9606		20170628	P		UniProtKB	P05067:PRO_0000000099	APP	involved_in	GO:0010629	negative regulation of gene expression	ECO:0000304	TAS	PMID:21803450		9606	regulates_expression_of(ENSEMBL:ENSG00000120885)	20170201	P
UniProtKB	P05067:PRO_0000000093	APP	NOT|colocalizes_with	GO:0030425	dendrite	ECO:0000314	IDA	PMID:17251419		9606		20170628	C		UniProtKB	P05067:PRO_0000000099	APP	involved_in	GO:0043280	positive regulation of cysteine-type endopeptidase activity involved in apoptotic process	ECO:0000314	IDA	PMID:21803450		9606	part_of(GO:1905893)|part_of(GO:1905896)|part_of(GO:1905898)	20170201	P
UniProtKB	P05067:PRO_0000000093	APP	NOT|colocalizes_with	GO:0097060	synaptic membrane	ECO:0000314	IDA	PMID:17308309		9606		20170406	C		UniProtKB	P05067:PRO_0000000099	APP	involved_in	GO:1905893	positive regulation of cellular response to thapsigargin	ECO:0000314	IDA	PMID:21803450		9606		20170201	P
UniProtKB	P05067:PRO_0000000093	APP	enables	GO:0005109	frizzled binding	ECO:0000353	IPI	PMID:18234671	UniProtKB:Q13467|UniProtKB:Q9ULV1	9606		20170505	F		UniProtKB	P05067:PRO_0000000099	APP	involved_in	GO:1905896	positive regulation of cellular response to tunicamycin	ECO:0000314	IDA	PMID:21803450		9606		20170201	P
UniProtKB	P05067:PRO_0000000093	APP	involved_in	GO:0010629	negative regulation of gene expression	ECO:0000316	IGI	PMID:18234671	UniProtKB:P56704	9606	occurs_in(CL:0000540),regulates_expression_of(ENSEMBL:ENSG00000110092),part_of(GO:0090090)	20170505	P		UniProtKB	P05067:PRO_0000000099	APP	involved_in	GO:1905898	positive regulation of response to endoplasmic reticulum stress	ECO:0000314	IDA	PMID:21803450		9606		20170201	P
UniProtKB	P05067:PRO_0000000093	APP	involved_in	GO:0010629	negative regulation of gene expression	ECO:0000316	IGI	PMID:18234671	UniProtKB:P56704	9606	occurs_in(CL:0000540),regulates_expression_of(ENSEMBL:ENSG00000138795),part_of(GO:0090090)	20170505	P		UniProtKB	P05067:PRO_0000000099	APP	NOT|involved_in	GO:0006990	positive regulation of transcription from RNA polymerase II promoter involved in unfolded protein response	ECO:0000314	IDA	PMID:21803450		9606		20170201	P
UniProtKB	P05067:PRO_0000000093	APP	involved_in	GO:0010629	negative regulation of gene expression	ECO:0000316	IGI	PMID:18234671	UniProtKB:P56704	9606	occurs_in(CL:0000540),regulates_expression_of(ENSEMBL:ENSG00000168646),part_of(GO:0090090)	20170505	P		UniProtKB	P05067	APP	involved_in	GO:0010468	regulation of gene expression	ECO:0000316	IGI	PMID:21857966	UniProtKB:P49768	9606	regulates_expression_of(ENSEMBL:ENSG00000163251),regulates(GO:0018108),occurs_in(UBERON:0002421),regulates_o_occurs_in(UBERON:0002421)|regulates_expression_of(ENSEMBL:ENSG00000114251),regulates(GO:0018108),occurs_in(UBERON:0002421),regulates_o_occurs_in(UBERON:0002421)	20171220	P
UniProtKB	P05067:PRO_0000000093	APP	involved_in	GO:0090090	negative regulation of canonical Wnt signaling pathway	ECO:0000314	IDA	PMID:18234671		9606	occurs_in(CL:0000540)	20170505	P		UniProtKB	P05067	APP	involved_in	GO:0030111	regulation of Wnt signaling pathway	ECO:0000305	IC	PMID:21857966	GO:0010468	9606	occurs_in(UBERON:0002421),regulates_o_occurs_in(UBERON:0002421),causally_upstream_of(GO:0070997)	20171220	P
UniProtKB	P05067:PRO_0000000093	APP	involved_in	GO:1900181	negative regulation of protein localization to nucleus	ECO:0000316	IGI	PMID:18234671	UniProtKB:P56704	9606	occurs_in(CL:0000540),has_regulation_target(UniProtKB:P35222)	20170505	P		UniProtKB	P05067	APP	involved_in	GO:0050730	regulation of peptidyl-tyrosine phosphorylation	ECO:0000316	IGI	PMID:21857966	UniProtKB:P49768	9606	has_regulation_target(UniProtKB:Q9UQM7)	20171220	P
UniProtKB	P05067:PRO_0000000093	APP	enables	GO:0046982	protein heterodimerization activity	ECO:0000353	IPI	PMID:18568035	UniProtKB:P05067:PRO_0000000092	9606		20170213	F		UniProtKB	P05067:PRO_0000000092	APP	NOT|involved_in	GO:1902514	regulation of calcium ion transmembrane transport via high voltage-gated calcium channel	ECO:0000314	IDA	PMID:21883149		9606		20170523	P
UniProtKB	P05067:PRO_0000000093	APP	part_of	GO:0032991	protein-containing complex	ECO:0000353	IPI	PMID:18568035	UniProtKB:P05067:PRO_0000000092	9606		20170307	C		UniProtKB	P05067:PRO_0000000092	APP	enables	GO:0034185	apolipoprotein binding	ECO:0000353	IPI	PMID:22138302	UniProtKB:P02649	9606	occurs_in(UBERON:0001359)	20170502	F
UniProtKB	P05067:PRO_0000000093	APP	enables	GO:0046983	protein dimerization activity	ECO:0000315	IMP	PMID:19660551		9606	occurs_in(UBERON:0000955),part_of(GO:0007568),has_output(ComplexPortal:CPX-1120),has_output(ComplexPortal:CPX-1062),has_input(UniProtKB:P05067:PRO_0000000092)	20170710	F		UniProtKB	P05067:PRO_0000000092	APP	enables	GO:0046983	protein dimerization activity	ECO:0000314	IDA	PMID:22138302		9606		20170502	F
UniProtKB	P05067:PRO_0000000093	APP	involved_in	GO:0051262	protein tetramerization	ECO:0000315	IMP	PMID:19660551		9606	occurs_in(UBERON:0000955),part_of(GO:0007568),has_input(UniProtKB:P05067:PRO_0000000092),has_output(ComplexPortal:CPX-1120),has_output(ComplexPortal:CPX-1062)	20170710	P		UniProtKB	P05067:PRO_0000000092	APP	part_of	GO:1990777	lipoprotein particle	ECO:0000314	IDA	PMID:22138302		9606	part_of(UBERON:0001359)	20170502	C
UniProtKB	P05067:PRO_0000000093	APP	involved_in	GO:0070206	protein trimerization	ECO:0000315	IMP	PMID:19660551		9606	occurs_in(UBERON:0000955),part_of(GO:0007568),has_input(UniProtKB:P05067:PRO_0000000092),has_output(ComplexPortal:CPX-1120),has_output(ComplexPortal:CPX-1062)	20170710	P		UniProtKB	P05067:PRO_0000000093	APP	enables	GO:0034185	apolipoprotein binding	ECO:0000353	IPI	PMID:22138302	UniProtKB:P02649	9606	occurs_in(UBERON:0001359)	20170502	F
UniProtKB	P05067:PRO_0000000093	APP	NOT|colocalizes_with	GO:0032590	dendrite membrane	ECO:0000304	TAS	PMID:20032460		9606		20170628	C		UniProtKB	P05067:PRO_0000000093	APP	enables	GO:0046983	protein dimerization activity	ECO:0000314	IDA	PMID:22138302		9606		20170502	F
UniProtKB	P05067:PRO_0000000093	APP	enables	GO:0005178	integrin binding	ECO:0000314	IDA	PMID:21126803		9606	occurs_in(CL:0000066),occurs_in(GO:0009897)	20170717	F		UniProtKB	P05067:PRO_0000000093	APP	part_of	GO:0034363	intermediate-density lipoprotein particle	ECO:0000314	IDA	PMID:22138302		9606		20170502	C
UniProtKB	P05067:PRO_0000000093	APP	enables	GO:0043395	heparan sulfate proteoglycan binding	ECO:0000315	IMP	PMID:21289173		9606		20170503	F		UniProtKB	P05067:PRO_0000000093	APP	part_of	GO:0034364	high-density lipoprotein particle	ECO:0000314	IDA	PMID:22138302		9606		20170502	C
UniProtKB	P05067:PRO_0000000093	APP	enables	GO:1904399	heparan sulfate binding	ECO:0000304	TAS	PMID:21289173		9606		20170503	F		UniProtKB	P05067:PRO_0000000093	APP	part_of	GO:1990777	lipoprotein particle	ECO:0000314	IDA	PMID:22138302		9606	part_of(UBERON:0001359)	20170502	C
UniProtKB	P05067:PRO_0000000093	APP	enables	GO:0034185	apolipoprotein binding	ECO:0000353	IPI	PMID:22138302	UniProtKB:P02649	9606	occurs_in(UBERON:0001359)	20170502	F		UniProtKB	P05067:PRO_0000000093	APP	enables	GO:0042803	protein homodimerization activity	ECO:0000314	IDA	PMID:22179788		9606		20170206	F
UniProtKB	P05067:PRO_0000000093	APP	enables	GO:0046983	protein dimerization activity	ECO:0000314	IDA	PMID:22138302		9606		20170502	F		UniProtKB	P05067:PRO_0000000093	APP	involved_in	GO:0051260	protein homooligomerization	ECO:0000314	IDA	PMID:22179788		9606	has_input(UniProtKB:P05067:PRO_0000000093)	20170213	P
UniProtKB	P05067:PRO_0000000093	APP	part_of	GO:0034363	intermediate-density lipoprotein particle	ECO:0000314	IDA	PMID:22138302		9606		20170502	C		UniProtKB	P05067:PRO_0000000093	APP	part_of	GO:0106003	amyloid-beta complex	ECO:0000353	IPI	PMID:22179788	UniProtKB:P05067:PRO_0000000093	9606		20180118	C
UniProtKB	P05067:PRO_0000000093	APP	part_of	GO:0034364	high-density lipoprotein particle	ECO:0000314	IDA	PMID:22138302		9606		20170502	C		UniProtKB	P05067:PRO_0000000093	APP	involved_in	GO:1901215	negative regulation of neuron death	ECO:0000314	IDA	PMID:2218531		9606	happens_during(GO:0030182),occurs_in(UBERON:0002421)	20170508	P
UniProtKB	P05067:PRO_0000000093	APP	part_of	GO:1990777	lipoprotein particle	ECO:0000314	IDA	PMID:22138302		9606	part_of(UBERON:0001359)	20170502	C		UniProtKB	P05067:PRO_0000000093	APP	involved_in	GO:1901216	positive regulation of neuron death	ECO:0000314	IDA	PMID:2218531		9606	happens_during(GO:0007416),happens_during(GO:0016358),occurs_in(UBERON:0002421)	20170508	P
UniProtKB	P05067:PRO_0000000093	APP	enables	GO:0042803	protein homodimerization activity	ECO:0000314	IDA	PMID:22179788		9606		20170206	F		UniProtKB	P05067	APP	involved_in	GO:0010628	positive regulation of gene expression	ECO:0000316	IGI	PMID:22198949	UniProtKB:P49768	9606	regulates_expression_of(ENSEMBL:ENSG00000136634),occurs_in(UBERON:0000955)|regulates_expression_of(ENSEMBL:ENSG00000118520),occurs_in(UBERON:0000955)	20170523	P
UniProtKB	P05067:PRO_0000000093	APP	involved_in	GO:0051260	protein homooligomerization	ECO:0000314	IDA	PMID:22179788		9606	has_input(UniProtKB:P05067:PRO_0000000093)	20170213	P		UniProtKB	P05067	APP	involved_in	GO:0010629	negative regulation of gene expression	ECO:0000316	IGI	PMID:22198949	UniProtKB:P49768	9606	regulates_expression_of(ENSEMBL:ENSG00000232810),occurs_in(UBERON:0000955)|regulates_expression_of(ENSEMBL:ENSG00000125538),occurs_in(UBERON:0000955)|regulates_expression_of(ENSEMBL:ENSG00000108691),occurs_in(UBERON:0000955)	20170523	P
UniProtKB	P05067:PRO_0000000093	APP	part_of	GO:0106003	amyloid-beta complex	ECO:0000353	IPI	PMID:22179788	UniProtKB:P05067:PRO_0000000093	9606		20180118	C		UniProtKB	P05067	APP	involved_in	GO:0014005	microglia development	ECO:0000316	IGI	PMID:22198949	UniProtKB:P49768,UniProtKB:Q9QUN7	9606	has_agent(CL:0002092),occurs_in(UBERON:0002421)	20170523	P
UniProtKB	P05067:PRO_0000000093	APP	involved_in	GO:1901215	negative regulation of neuron death	ECO:0000314	IDA	PMID:2218531		9606	happens_during(GO:0030182),occurs_in(UBERON:0002421)	20170508	P		UniProtKB	P05067	APP	involved_in	GO:0032640	tumor necrosis factor production	ECO:0000316	IGI	PMID:22198949	UniProtKB:P49768,UniProtKB:Q9QUN7	9606	has_agent(CL:0002092),occurs_in(UBERON:0002421)	20170523	P
UniProtKB	P05067:PRO_0000000093	APP	involved_in	GO:1901216	positive regulation of neuron death	ECO:0000314	IDA	PMID:2218531		9606	happens_during(GO:0007416),happens_during(GO:0016358),occurs_in(UBERON:0002421)	20170508	P		UniProtKB	P12023:PRO_0000000119	App	enables	GO:0050750	low-density lipoprotein particle receptor binding	ECO:0000353	IPI	PMID:22383525	UniProtKB:P35951	10090		20170602	F
UniProtKB	P05067:PRO_0000000093	APP	enables	GO:0097645	amylin binding	ECO:0000304	TAS	PMID:22500019		9606		20170524	F		UniProtKB	P05067:PRO_0000000092	APP	enables	GO:0097645	amylin binding	ECO:0000304	TAS	PMID:22500019		9606		20170524	F
UniProtKB	P05067:PRO_0000000093	APP	involved_in	GO:0051260	protein homooligomerization	ECO:0000304	TAS	PMID:22500019		9606		20170524	P		UniProtKB	P05067:PRO_0000000092	APP	involved_in	GO:0007204	positive regulation of cytosolic calcium ion concentration	ECO:0000303	NAS	PMID:22500019		9606		20170524	P
UniProtKB	P05067:PRO_0000000093	APP	enables	GO:0051087	chaperone binding	ECO:0000353	IPI	PMID:23106396	UniProtKB:P02511|UniProtKB:P10909	9606		20180118	F		UniProtKB	P05067:PRO_0000000092	APP	involved_in	GO:0010739	positive regulation of protein kinase A signaling	ECO:0000303	NAS	PMID:22500019		9606		20170524	P
UniProtKB	P05067:PRO_0000000093	APP	colocalizes_with	GO:0005764	lysosome	ECO:0000314	IDA	PMID:23152628		9606	part_of(CL:0002590)	20170503	C		UniProtKB	P05067:PRO_0000000092	APP	involved_in	GO:0010823	negative regulation of mitochondrion organization	ECO:0000304	TAS	PMID:22500019		9606		20170524	P
UniProtKB	P05067:PRO_0000000093	APP	involved_in	GO:0010628	positive regulation of gene expression	ECO:0000316	IGI	PMID:23164821	UniProtKB:O94907	9606	regulates_o_occurs_in(CL:0002609),regulates_expression_of(ENSEMBL:ENSG00000166886)|regulates_o_occurs_in(CL:0002609),regulates_expression_of(ENSEMBL:ENSG00000155090)|regulates_o_occurs_in(CL:0002609),regulates_expression_of(ENSEMBL:ENSG00000110092)|regulates_o_occurs_in(CL:0002609),regulates_expression_of(ENSEMBL:ENSG00000170345)|regulates_o_occurs_in(CL:0002609),regulates_expression_of(ENSEMBL:E…	20170627	P		UniProtKB	P05067:PRO_0000000092	APP	involved_in	GO:0043065	positive regulation of apoptotic process	ECO:0000304	TAS	PMID:22500019		9606		20170524	P
UniProtKB	P05067:PRO_0000000093	APP	involved_in	GO:1901216	positive regulation of neuron death	ECO:0000316	IGI	PMID:23164821	UniProtKB:D3Z9J1	9606	regulates_o_occurs_in(CL:0002609)	20170627	P		UniProtKB	P05067:PRO_0000000092	APP	involved_in	GO:0043410	positive regulation of MAPK cascade	ECO:0000303	NAS	PMID:22500019		9606		20170524	P
UniProtKB	P05067:PRO_0000000093	APP	involved_in	GO:1901216	positive regulation of neuron death	ECO:0000316	IGI	PMID:23164821	UniProtKB:P10909	9606	occurs_in(GO:0005622)	20170627	P		UniProtKB	P05067:PRO_0000000092	APP	involved_in	GO:0051260	protein homooligomerization	ECO:0000304	TAS	PMID:22500019		9606		20170524	P
UniProtKB	P05067:PRO_0000000093	APP	involved_in	GO:1902949	positive regulation of tau-protein kinase activity	ECO:0000316	IGI	PMID:23164821	UniProtKB:D4A4F4	9606	regulates_o_occurs_in(CL:0002609)	20170627	P		UniProtKB	P05067:PRO_0000000092	APP	involved_in	GO:0051897	positive regulation of protein kinase B signaling	ECO:0000303	NAS	PMID:22500019		9606		20170524	P
UniProtKB	P05067:PRO_0000000093	APP	involved_in	GO:1904591	positive regulation of protein import	ECO:0000314	IDA	PMID:23164821		9606	positively_regulates(GO:0098776),has_regulation_target(UniProtKB:P05371),occurs_in(CL:0002609)	20170627	P		UniProtKB	P05067:PRO_0000000093	APP	enables	GO:0097645	amylin binding	ECO:0000304	TAS	PMID:22500019		9606		20170524	F
UniProtKB	P05067:PRO_0000000093	APP	part_of	GO:0005615	extracellular space	ECO:0000315	IMP	PMID:23640054		9606	part_of(UBERON:0000955),part_of(UBERON:0000913),part_of(GO:0106003)	20170710	C		UniProtKB	P05067:PRO_0000000093	APP	involved_in	GO:0051260	protein homooligomerization	ECO:0000304	TAS	PMID:22500019		9606		20170524	P
UniProtKB	P05067:PRO_0000000093	APP	part_of	GO:0106003	amyloid-beta complex	ECO:0000315	IMP	PMID:23640054		9606	part_of(UBERON:0000955),part_of(UBERON:0000913)	20170710	C		UniProtKB	P05067:PRO_0000000092	APP	NOT|involved_in	GO:0050731	positive regulation of peptidyl-tyrosine phosphorylation	ECO:0000314	IDA	PMID:22635104		9606		20170906	P
UniProtKB	P05067:PRO_0000000093	APP	part_of	GO:0031904	endosome lumen	ECO:0000304	TAS	PMID:24305806		9606	exists_during(GO:0034205)	20180111	C		UniProtKB	P05067:PRO_0000000093	APP	enables	GO:0051087	chaperone binding	ECO:0000353	IPI	PMID:23106396	UniProtKB:P02511|UniProtKB:P10909	9606		20180118	F
UniProtKB	P05067:PRO_0000000093	APP	part_of	GO:0005615	extracellular space	ECO:0000314	IDA	PMID:26005850		9606	part_of(UBERON:0000913)|part_of(UBERON:0001969)	20170518	C		UniProtKB	P05067	APP	involved_in	GO:0002265	astrocyte activation involved in immune response	ECO:0000316	IGI	PMID:23152628	UniProtKB:A0A0R4J0I9,UniProtKB:P49768	9606	part_of(GO:1904646),occurs_in(CL:0002590)	20170503	P
UniProtKB	P05067:PRO_0000000093	APP	involved_in	GO:0032092	positive regulation of protein binding	ECO:0000314	IDA	PMID:26005850		9606	has_regulation_target(UniProtKB:O95782),has_regulation_target(UniProtKB:Q07954),regulates_o_occurs_in(UBERON:0013694)|has_regulation_target(UniProtKB:Q00610),has_regulation_target(UniProtKB:Q07954),regulates_o_occurs_in(UBERON:0013694)|has_regulation_target(UniProtKB:Q13492),has_regulation_target(UniProtKB:Q07954),regulates_o_occurs_in(UBERON:0013694)	20170522	P		UniProtKB	P05067	APP	involved_in	GO:1904646	cellular response to amyloid-beta	ECO:0000316	IGI	PMID:23152628	UniProtKB:A0A0R4J0I9,UniProtKB:P49768	9606	occurs_in(CL:0002590)	20170503	P
UniProtKB	P05067:PRO_0000000093	APP	part_of	GO:0005769	early endosome	ECO:0000314	IDA	PMID:26005850		9606	part_of(CL:1001602)	20170522	C		UniProtKB	P05067:PRO_0000000092	APP	colocalizes_with	GO:0005764	lysosome	ECO:0000314	IDA	PMID:23152628		9606	part_of(CL:0002590)	20170503	C
UniProtKB	P05067:PRO_0000000093	APP	part_of	GO:0070381	endosome to plasma membrane transport vesicle	ECO:0000314	IDA	PMID:26005850		9606	part_of(CL:1001602)	20170522	C		UniProtKB	P05067:PRO_0000000093	APP	colocalizes_with	GO:0005764	lysosome	ECO:0000314	IDA	PMID:23152628		9606	part_of(CL:0002590)	20170503	C
UniProtKB	P05067:PRO_0000000093	APP	involved_in	GO:0010628	positive regulation of gene expression	ECO:0000315	IMP	PMID:27853422		9606	regulates_expression_of(ENSEMBL:ENSG00000067900)	20171206	P		UniProtKB	P05067:PRO_0000000092	APP	involved_in	GO:0010628	positive regulation of gene expression	ECO:0000304	TAS	PMID:23164821		9606	regulates_expression_of(ENSEMBL:ENSG00000107984),regulates_o_occurs_in(CL:0000540),negatively_regulates(GO:0060070)	20170426	P
UniProtKB	P05067:PRO_0000000093	APP	colocalizes_with	GO:0034361	very-low-density lipoprotein particle	ECO:0000353	IPI	PMID:9211985	UniProtKB:P02649	9606		20170425	C		UniProtKB	P05067	APP	involved_in	GO:0010628	positive regulation of gene expression	ECO:0000315	IMP	PMID:23164821		9606	occurs_in(UBERON:0000956),regulates_expression_of(ENSEMBL:ENSG00000155090)|occurs_in(UBERON:0000956),regulates_expression_of(ENSEMBL:ENSG00000110092)|occurs_in(UBERON:0000956),regulates_expression_of(ENSEMBL:ENSG00000170345)|occurs_in(UBERON:0000956),regulates_expression_of(ENSEMBL:ENSG00000120738)	20170427	P
UniProtKB	P05067:PRO_0000000093	APP	colocalizes_with	GO:0034362	low-density lipoprotein particle	ECO:0000353	IPI	PMID:9211985	UniProtKB:P02649	9606		20170425	C		UniProtKB	P05067:PRO_0000000092	APP	involved_in	GO:0010628	positive regulation of gene expression	ECO:0000316	IGI	PMID:23164821	UniProtKB:D3Z9J1	9606	regulates_o_occurs_in(CL:0002609),regulates_expression_of(ENSEMBL:ENSG00000166886)|regulates_o_occurs_in(CL:0002609),regulates_expression_of(ENSEMBL:ENSG00000155090)|regulates_o_occurs_in(CL:0002609),regulates_expression_of(ENSEMBL:ENSG00000110092)|regulates_o_occurs_in(CL:0002609),regulates_expression_of(ENSEMBL:ENSG00000170345)|regulates_o_occurs_in(CL:0002609),regulates_expression_of(ENSEMBL:E…	20170627	P
UniProtKB	P05067:PRO_0000000093	APP	colocalizes_with	GO:0034363	intermediate-density lipoprotein particle	ECO:0000353	IPI	PMID:9211985	UniProtKB:P02649	9606		20170425	C		UniProtKB	P05067:PRO_0000000092	APP	involved_in	GO:0010628	positive regulation of gene expression	ECO:0000316	IGI	PMID:23164821	UniProtKB:O94907	9606	regulates_o_occurs_in(CL:0002609),regulates_expression_of(ENSEMBL:ENSG00000166886)|regulates_o_occurs_in(CL:0002609),regulates_expression_of(ENSEMBL:ENSG00000155090)|regulates_o_occurs_in(CL:0002609),regulates_expression_of(ENSEMBL:ENSG00000110092)|regulates_o_occurs_in(CL:0002609),regulates_expression_of(ENSEMBL:ENSG00000170345)|regulates_o_occurs_in(CL:0002609),regulates_expression_of(ENSEMBL:E…	20170627	P
UniProtKB	P05067:PRO_0000000093	APP	colocalizes_with	GO:0034364	high-density lipoprotein particle	ECO:0000353	IPI	PMID:9211985	UniProtKB:P02647	9606		20170425	C		UniProtKB	P05067:PRO_0000000092	APP	involved_in	GO:0010628	positive regulation of gene expression	ECO:0000316	IGI	PMID:23164821	UniProtKB:P05371	9606	regulates_o_occurs_in(CL:0002609),regulates_expression_of(ENSEMBL:ENSRNOG00000011692)|regulates_o_occurs_in(CL:0002609),regulates_expression_of(ENSEMBL:ENSRNOG00000008415)|regulates_o_occurs_in(CL:0002609),regulates_expression_of(ENSEMBL:ENSRNOG00000006118)|regulates_o_occurs_in(CL:0002609),regulates_expression_of(ENSEMBL:ENSRNOG00000020918)|regulates_o_occurs_in(CL:0002609),regulates_expression_…	20170627	P
UniProtKB	P05067:PRO_0000000093	APP	enables	GO:0034185	apolipoprotein binding	ECO:0000353	IPI	PMID:9211985	UniProtKB:P02647	9606	occurs_in(GO:0034364)	20170425	F		UniProtKB	P05067:PRO_0000000092	APP	involved_in	GO:0010628	positive regulation of gene expression	ECO:0000316	IGI	PMID:23164821	UniProtKB:P10361	9606	regulates_o_occurs_in(CL:0002609),regulates_expression_of(ENSEMBL:ENSRNOG00000008015)|regulates_o_occurs_in(CL:0002609),regulates_expression_of(ENSEMBL:ENSRNOG00000019422)|regulates_o_occurs_in(CL:0002609),regulates_expression_of(ENSEMBL:ENSRNOG00000011692)	20170627	P
UniProtKB	P05067:PRO_0000000093	APP	enables	GO:0034185	apolipoprotein binding	ECO:0000353	IPI	PMID:9211985	UniProtKB:P02649	9606	occurs_in(GO:0034362)|occurs_in(GO:0034363)|occurs_in(GO:0034361)	20170425	F		UniProtKB	P05067:PRO_0000000092	APP	involved_in	GO:0010628	positive regulation of gene expression	ECO:0000316	IGI	PMID:23164821	UniProtKB:P10909	9606	regulates_expression_of(ENSEMBL:ENSRNOG00000011692),occurs_in(UBERON:0000956)	20170627	P
UniProtKB	P05067:PRO_0000000093	APP	enables	GO:0034185	apolipoprotein binding	ECO:0000353	IPI	PMID:9211985	UniProtKB:P04639	9606	occurs_in(GO:0034362)|occurs_in(GO:0034363)|occurs_in(GO:0034361)|occurs_in(GO:0034364)	20170425	F		UniProtKB	P05067:PRO_0000000092	APP	involved_in	GO:1901216	positive regulation of neuron death	ECO:0000316	IGI	PMID:23164821	UniProtKB:P10909	9606	occurs_in(GO:0005622)	20170627	P
UniProtKB	P05067:PRO_0000000093	APP	enables	GO:0034185	apolipoprotein binding	ECO:0000353	IPI	PMID:9211985	UniProtKB:P09809	9606	occurs_in(GO:0034364)	20170425	F		UniProtKB	P05067:PRO_0000000093	APP	involved_in	GO:0010628	positive regulation of gene expression	ECO:0000316	IGI	PMID:23164821	UniProtKB:O94907	9606	regulates_o_occurs_in(CL:0002609),regulates_expression_of(ENSEMBL:ENSG00000166886)|regulates_o_occurs_in(CL:0002609),regulates_expression_of(ENSEMBL:ENSG00000155090)|regulates_o_occurs_in(CL:0002609),regulates_expression_of(ENSEMBL:ENSG00000110092)|regulates_o_occurs_in(CL:0002609),regulates_expression_of(ENSEMBL:ENSG00000170345)|regulates_o_occurs_in(CL:0002609),regulates_expression_of(ENSEMBL:E…	20170627	P
UniProtKB	P05067:PRO_0000000093	APP	enables	GO:0034185	apolipoprotein binding	ECO:0000353	IPI	PMID:9211985	UniProtKB:P18287	9606	occurs_in(GO:0034362)|occurs_in(GO:0034363)|occurs_in(GO:0034361)	20170425	F		UniProtKB	P05067:PRO_0000000093	APP	involved_in	GO:1901216	positive regulation of neuron death	ECO:0000316	IGI	PMID:23164821	UniProtKB:D3Z9J1	9606	regulates_o_occurs_in(CL:0002609)	20170627	P
UniProtKB	P05067:PRO_0000000093	APP	involved_in	GO:0042157	lipoprotein metabolic process	ECO:0000305	IC	PMID:9211985	GO:0034185,GO:0034361,GO:0034362,GO:0034363,GO:0034364	9606		20170425	P		UniProtKB	P05067:PRO_0000000093	APP	involved_in	GO:1901216	positive regulation of neuron death	ECO:0000316	IGI	PMID:23164821	UniProtKB:P10909	9606	occurs_in(GO:0005622)	20170627	P
UniProtKB	P05067:PRO_0000000093	APP	enables	GO:0051087	chaperone binding	ECO:0000353	IPI	PMID:9228033	UniProtKB:P10909	9606		20170502	F		UniProtKB	P05067:PRO_0000000093	APP	involved_in	GO:1902949	positive regulation of tau-protein kinase activity	ECO:0000316	IGI	PMID:23164821	UniProtKB:D4A4F4	9606	regulates_o_occurs_in(CL:0002609)	20170627	P
UniProtKB	P05067:PRO_0000000093	APP	part_of	GO:0032991	protein-containing complex	ECO:0000314	IDA	PMID:9228033		9606		20170502	C		UniProtKB	P05067:PRO_0000000093	APP	involved_in	GO:1904591	positive regulation of protein import	ECO:0000314	IDA	PMID:23164821		9606	positively_regulates(GO:0098776),has_regulation_target(UniProtKB:P05371),occurs_in(CL:0002609)	20170627	P
UniProtKB	P05067:PRO_0000000094	APP	part_of	GO:0016020	membrane	ECO:0000314	IDA	PMID:16541076		9606		20170208	C		UniProtKB	P05067:PRO_0000000092	APP	enables	GO:0042803	protein homodimerization activity	ECO:0000314	IDA	PMID:23386614		9606		20170222	F
UniProtKB	P05067:PRO_0000000094	APP	part_of	GO:0005886	plasma membrane	ECO:0000314	IDA	PMID:20164328		9606		20170208	C		UniProtKB	P05067:PRO_0000000092	APP	involved_in	GO:0051260	protein homooligomerization	ECO:0000314	IDA	PMID:23386614		9606	has_input(UniProtKB:P05067)	20170222	P
UniProtKB	P05067:PRO_0000000097	APP	involved_in	GO:0010629	negative regulation of gene expression	ECO:0000304	TAS	PMID:20005821		9606	regulates_expression_of(ENSEMBL:ENSG00000123384),causally_upstream_of(GO:0048259)	20170601	P		UniProtKB	P05067:PRO_0000000092	APP	part_of	GO:0106003	amyloid-beta complex	ECO:0000353	IPI	PMID:23386614	UniProtKB:P05067:PRO_0000000092	9606		20170626	C
UniProtKB	P05067:PRO_0000000097	APP	involved_in	GO:0051247	positive regulation of protein metabolic process	ECO:0000304	TAS	PMID:20005821		9606	has_input(UniProtKB:P02649)	20170601	P		UniProtKB	P05067	APP	involved_in	GO:1902004	positive regulation of amyloid-beta formation	ECO:0000316	IGI	PMID:23640054	UniProtKB:P49768	9606	part_of(GO:0007568),has_output(UniProtKB:P05067:PRO_0000000092),has_output(UniProtKB:P05067:PRO_0000000093),regulates_o_occurs_in(UBERON:0000955),occurs_in(UBERON:0000955),has_output(ComplexPortal:CPX-1120)|part_of(GO:0007568),has_output(UniProtKB:P05067:PRO_0000000092),has_output(UniProtKB:P05067:PRO_0000000093),regulates_o_occurs_in(UBERON:0000913),occurs_in(UBERON:0000955),has_output(ComplexPo…	20170710	P
UniProtKB	P05067:PRO_0000000097	APP	part_of	GO:0005622	intracellular	ECO:0000303	NAS	PMID:20005821		9606		20170601	C		UniProtKB	P05067:PRO_0000000092	APP	part_of	GO:0005615	extracellular space	ECO:0000315	IMP	PMID:23640054		9606	part_of(UBERON:0000955),part_of(UBERON:0000913),part_of(GO:0106003)	20170710	C
UniProtKB	P05067:PRO_0000000099	APP	involved_in	GO:0000122	negative regulation of transcription by RNA polymerase II	ECO:0000316	IGI	PMID:21803450	UniProtKB:O00213	9606	regulates_transcription_of(ENSEMBL:ENSG00000120885)	20170201	P		UniProtKB	P05067:PRO_0000000092	APP	part_of	GO:0106003	amyloid-beta complex	ECO:0000315	IMP	PMID:23640054		9606	part_of(UBERON:0000955),part_of(UBERON:0000913)	20170710	C
UniProtKB	P05067:PRO_0000000099	APP	involved_in	GO:0010629	negative regulation of gene expression	ECO:0000304	TAS	PMID:21803450		9606	regulates_expression_of(ENSEMBL:ENSG00000120885)	20170201	P		UniProtKB	P05067:PRO_0000000093	APP	part_of	GO:0005615	extracellular space	ECO:0000315	IMP	PMID:23640054		9606	part_of(UBERON:0000955),part_of(UBERON:0000913),part_of(GO:0106003)	20170710	C
UniProtKB	P05067:PRO_0000000099	APP	involved_in	GO:0043280	positive regulation of cysteine-type endopeptidase activity involved in apoptotic process	ECO:0000314	IDA	PMID:21803450		9606	part_of(GO:1905893)|part_of(GO:1905896)|part_of(GO:1905898)	20170201	P		UniProtKB	P05067:PRO_0000000093	APP	part_of	GO:0106003	amyloid-beta complex	ECO:0000315	IMP	PMID:23640054		9606	part_of(UBERON:0000955),part_of(UBERON:0000913)	20170710	C
UniProtKB	P05067:PRO_0000000099	APP	involved_in	GO:1905893	positive regulation of cellular response to thapsigargin	ECO:0000314	IDA	PMID:21803450		9606		20170201	P		UniProtKB	P05067:PRO_0000000092	APP	enables	GO:0005102	signaling receptor binding	ECO:0000353	IPI	PMID:23921129	UniProtKB:P31994	9606		20170606	F
UniProtKB	P05067:PRO_0000000099	APP	involved_in	GO:1905896	positive regulation of cellular response to tunicamycin	ECO:0000314	IDA	PMID:21803450		9606		20170201	P		UniProtKB	P05067:PRO_0000000092	APP	involved_in	GO:1901216	positive regulation of neuron death	ECO:0000316	IGI	PMID:23921129	ComplexPortal:CPX-1134	9606	regulates_o_occurs_in(CL:0002609),part_of(GO:1904646)	20170621	P
UniProtKB	P05067:PRO_0000000099	APP	involved_in	GO:1905898	positive regulation of response to endoplasmic reticulum stress	ECO:0000314	IDA	PMID:21803450		9606		20170201	P		UniProtKB	P05067:PRO_0000000092	APP	involved_in	GO:1902950	regulation of dendritic spine maintenance	ECO:0000316	IGI	PMID:23921129	ComplexPortal:CPX-1134	9606	occurs_in(CL:0002608),part_of(GO:1904646),regulates_o_occurs_in(CL:0002608)	20170621	P
UniProtKB	P05067:PRO_0000000099	APP	NOT|involved_in	GO:0006990	positive regulation of transcription from RNA polymerase II promoter involved in unfolded protein response	ECO:0000314	IDA	PMID:21803450		9606		20170201	P		UniProtKB	P05067:PRO_0000000092	APP	involved_in	GO:1904646	cellular response to amyloid-beta	ECO:0000316	IGI	PMID:23921129	ComplexPortal:CPX-1134	9606	occurs_in(CL:0002609)|occurs_in(CL:0002608)	20170621	P
UniProtKB	P05067:PRO_0000384574	APP	part_of	GO:0016020	membrane	ECO:0000314	IDA	PMID:16541076		9606		20170208	C		UniProtKB	P05067	APP	involved_in	GO:0045944	positive regulation of transcription by RNA polymerase II	ECO:0000316	IGI	PMID:23921129	ComplexPortal:CPX-1134	9606	part_of(GO:1904646),regulates_transcription_of(ENSEMBL:ENSG00000072694)	20170622	P
UniProtKB	P05067:PRO_0000384574	APP	part_of	GO:0005886	plasma membrane	ECO:0000314	IDA	PMID:20164328		9606	exists_during(UBERON:0018241),part_of(UBERON:0002421)	20170208	C		UniProtKB	P05067	APP	involved_in	GO:0046330	positive regulation of JNK cascade	ECO:0000316	IGI	PMID:23921129	ComplexPortal:CPX-1134	9606	regulates_o_occurs_in(CL:0002609),part_of(GO:1904646),part_of(GO:1901216)	20170622	P
UniProtKB	Q7LC44	ARC	involved_in	GO:0061001	regulation of dendritic spine morphogenesis	ECO:0000250	ISS	GO_REF:0000024	UniProtKB:Q63053	9606	regulates_o_occurs_in(CL:0002608)	20170712	P		UniProtKB	P05067	APP	involved_in	GO:0048169	regulation of long-term neuronal synaptic plasticity	ECO:0000316	IGI	PMID:23921129	ComplexPortal:CPX-1134	9606	regulates_o_occurs_in(UBERON:0001954),occurs_in(UBERON:0001954)	20170622	P
UniProtKB	Q7LC44	ARC	involved_in	GO:0007616	long-term memory	ECO:0000304	TAS	PMID:15537891		9606		20170711	P		UniProtKB	P05067	APP	involved_in	GO:0051091	positive regulation of DNA-binding transcription factor activity	ECO:0000316	IGI	PMID:23921129	ComplexPortal:CPX-1134	9606	regulates_o_occurs_in(CL:0002609),part_of(GO:1904646),regulates_activity_of(UniProtKB:P05412)	20170622	P
UniProtKB	Q7LC44	ARC	involved_in	GO:0060291	long-term synaptic potentiation	ECO:0000304	TAS	PMID:15537891		9606		20170711	P		UniProtKB	P05067	APP	part_of	GO:0005615	extracellular space	ECO:0000314	IDA	PMID:23921129		9606	part_of(UBERON:0001954)	20170622	C
UniProtKB	Q7LC44	ARC	part_of	GO:0043025	neuronal cell body	ECO:0000304	TAS	PMID:15537891		9606	part_of(CL:0002608)	20170711	C		UniProtKB	P05067	APP	involved_in	GO:0007611	learning or memory	ECO:0000304	TAS	PMID:24012003		9606	part_of(GO:0090647),happens_during(GO:0007568)	20170509	P
UniProtKB	Q7LC44	ARC	involved_in	GO:0060997	dendritic spine morphogenesis	ECO:0000304	TAS	PMID:15537891		9606	occurs_at(GO:0098938)	20170712	P		UniProtKB	P05067	APP	involved_in	GO:0007611	learning or memory	ECO:0000316	IGI	PMID:24012003	UniProtKB:P41594,UniProtKB:P49768	9606	part_of(GO:0090647),happens_during(GO:0007568)	20170509	P
UniProtKB	O14497	ARID1A	involved_in	GO:0071277	cellular response to calcium ion	ECO:0007007	HEP	PMID:21237226		9606	occurs_in(GO:0005634)	20180307	P		UniProtKB	P05067	APP	involved_in	GO:0050808	synapse organization	ECO:0000316	IGI	PMID:24012003	UniProtKB:P41594,UniProtKB:P49768	9606	part_of(GO:0090647),happens_during(GO:0007568),occurs_in(UBERON:0001885)	20170509	P
UniProtKB	P13637	ATP1A3	part_of	GO:0016020	membrane	ECO:0000250	ISS	GO_REF:0000024	UniProtKB:P06687	9606	part_of(CL:0002608),exists_during(UBERON:0000066)|part_of(CL:1001611),exists_during(UBERON:0000066)	20170405	C		UniProtKB	P05067	APP	involved_in	GO:0090647	modulation of age-related behavioral decline	ECO:0000304	TAS	PMID:24012003		9606		20170509	P
UniProtKB	P13637	ATP1A3	involved_in	GO:1904646	cellular response to amyloid-beta	ECO:0000250	ISS	GO_REF:0000024	UniProtKB:P06687	9606	occurs_in(CL:0002608),happens_during(UBERON:0000066),occurs_in(GO:0016020),causally_upstream_of(GO:1903407)	20170831	P		UniProtKB	P05067	APP	involved_in	GO:0090647	modulation of age-related behavioral decline	ECO:0000316	IGI	PMID:24012003	UniProtKB:P41594,UniProtKB:P49768	9606	happens_during(GO:0007568)	20170509	P
UniProtKB	P13637	ATP1A3	enables	GO:0005391	sodium:potassium-exchanging ATPase activity	ECO:0000303	NAS	PMID:26224839		9606		20170329	F		UniProtKB	P05067	APP	involved_in	GO:0007611	learning or memory	ECO:0000316	IGI	PMID:24052308	UniProtKB:P49768,UniProtKB:P97484	9606	happens_during(UBERON:0018241),occurs_in(UBERON:0007023)	20170725	P
UniProtKB	P13637	ATP1A3	involved_in	GO:0060075	regulation of resting membrane potential	ECO:0000304	TAS	PMID:26224839		9606	occurs_in(CL:0000540)	20170329	P		UniProtKB	P05067	APP	involved_in	GO:0032092	positive regulation of protein binding	ECO:0000316	IGI	PMID:24052308	UniProtKB:P49768,UniProtKB:P97484	9606	has_regulation_target(UniProtKB:P97484),has_regulation_target(UniProtKB:P18760),regulates_o_occurs_in(UBERON:0001890),occurs_in(UBERON:0001890)	20170725	P
UniProtKB	P13637	ATP1A3	part_of	GO:0005890	sodium:potassium-exchanging ATPase complex	ECO:0000303	NAS	PMID:26224839		9606		20170329	C		UniProtKB	P05067:PRO_0000000092	APP	part_of	GO:0031904	endosome lumen	ECO:0000304	TAS	PMID:24305806		9606	exists_during(GO:0034205)	20180111	C
UniProtKB	P13637	ATP1A3	part_of	GO:0030424	axon	ECO:0000314	IDA	PMID:26224839		9606	part_of(CL:0000598),part_of(UBERON:0001869)|part_of(UBERON:0013693)	20170405	C		UniProtKB	P05067:PRO_0000000093	APP	part_of	GO:0031904	endosome lumen	ECO:0000304	TAS	PMID:24305806		9606	exists_during(GO:0034205)	20180111	C
UniProtKB	P13637	ATP1A3	part_of	GO:0032809	neuronal cell body membrane	ECO:0000305	IC	PMID:26224839	GO:0043025	9606	part_of(CL:0000598),part_of(UBERON:0001869)	20170405	C		UniProtKB	P05067:PRO_0000000092	APP	involved_in	GO:0051044	positive regulation of membrane protein ectodomain proteolysis	ECO:0000314	IDA	PMID:25015123		9606	has_regulation_target(UniProtKB:P01130),regulates_o_occurs_in(CL:2000044)|has_regulation_target(UniProtKB:Q07954),regulates_o_occurs_in(CL:2000044)	20170704	P
UniProtKB	P13637	ATP1A3	part_of	GO:0043025	neuronal cell body	ECO:0000314	IDA	PMID:26224839		9606	part_of(CL:0000598),part_of(UBERON:0001869)	20170405	C		UniProtKB	P05067:PRO_0000000092	APP	involved_in	GO:0051044	positive regulation of membrane protein ectodomain proteolysis	ECO:0000316	IGI	PMID:25015123	UniProtKB:P02649	9606	has_regulation_target(UniProtKB:P01130),regulates_o_occurs_in(CL:2000044)|has_regulation_target(UniProtKB:Q07954),regulates_o_occurs_in(CL:2000044)	20170704	P
UniProtKB	P13637	ATP1A3	enables	GO:0001540	amyloid-beta binding	ECO:0000314	IDA	PMID:26224839		9606	occurs_in(CL:0002608),happens_during(UBERON:0000066)|occurs_in(CL:1001611),happens_during(UBERON:0000066)	20170831	F		UniProtKB	P05067	APP	involved_in	GO:0090647	modulation of age-related behavioral decline	ECO:0000304	TAS	PMID:25390368		9606	causally_upstream_of(GO:0007611)	20170421	P
UniProtKB	P13637	ATP1A3	involved_in	GO:1990535	neuron projection maintenance	ECO:0000316	IGI	PMID:26224839	UniProtKB:P05067	9606	occurs_at(CL:0002608)	20170831	P		UniProtKB	P05067:PRO_0000000092	APP	colocalizes_with	GO:0043005	neuron projection	ECO:0000314	IDA	PMID:25390368		9606	part_of(CL:0002608)	20170627	C
UniProtKB	P56817	BACE1	enables	GO:0005515	protein binding	ECO:0000353	IPI	PMID:17573534	UniProtKB:P04925	9606		20170516	F		UniProtKB	P05067:PRO_0000000092	APP	colocalizes_with	GO:0044297	cell body	ECO:0000314	IDA	PMID:25390368		9606	part_of(CL:0000125),part_of(UBERON:0002421)|part_of(CL:0002608)	20170627	C
UniProtKB	P56817	BACE1	part_of	GO:0005769	early endosome	ECO:0000314	IDA	PMID:24305806		9606		20180111	C		UniProtKB	P05067:PRO_0000000092	APP	colocalizes_with	GO:0098793	presynapse	ECO:0000314	IDA	PMID:25390368		9606	part_of(CL:0000125),part_of(UBERON:0002421)|part_of(CL:0002608)	20170627	C
UniProtKB	P56817	BACE1	enables	GO:0005515	protein binding	ECO:0000353	IPI	PMID:27179792	UniProtKB:O00499	9606		20180205	F		UniProtKB	P05067:PRO_0000000092	APP	colocalizes_with	GO:0098794	postsynapse	ECO:0000314	IDA	PMID:25390368		9606	part_of(CL:0000125),part_of(UBERON:0002421)|part_of(CL:0002608)	20170627	C
UniProtKB	Q99933	BAG1	enables	GO:0031625	ubiquitin protein ligase binding	ECO:0000353	IPI	PMID:16207813	UniProtKB:Q9UNE7	9606		20180305	F		UniProtKB	P05067	APP	involved_in	GO:0042327	positive regulation of phosphorylation	ECO:0000316	IGI	PMID:25707991	UniProtKB:P49768	9606	occurs_in(UBERON:0002421),has_regulation_target(UniProtKB:Q14289),regulates_o_occurs_in(UBERON:0003881)|occurs_in(UBERON:0000956),has_regulation_target(UniProtKB:Q14289)	20171031	P
UniProtKB	O95816	BAG2	enables	GO:0005515	protein binding	ECO:0000353	IPI	PMID:16207813	UniProtKB:P11142	9606		20180305	F		UniProtKB	P05067:PRO_0000000092	APP	part_of	GO:0005615	extracellular space	ECO:0000314	IDA	PMID:26005850		9606	part_of(UBERON:0000913)|part_of(UBERON:0001969)	20170518	C
UniProtKB	O95816	BAG2	enables	GO:0044325	ion channel binding	ECO:0000353	IPI	PMID:16207813	UniProtKB:P13569	9606	part_of(GO:0050821)	20180305	F		UniProtKB	P05067:PRO_0000000093	APP	part_of	GO:0005615	extracellular space	ECO:0000314	IDA	PMID:26005850		9606	part_of(UBERON:0000913)|part_of(UBERON:0001969)	20170518	C
UniProtKB	O95816	BAG2	enables	GO:0051087	chaperone binding	ECO:0000353	IPI	PMID:16207813	UniProtKB:P11142	9606		20180305	F		UniProtKB	P05067:PRO_0000000092	APP	involved_in	GO:0007611	learning or memory	ECO:0000316	IGI	PMID:26005850	UniProtKB:Q7M6Y3	9606		20170522	P
UniProtKB	O95816	BAG2	involved_in	GO:0010954	positive regulation of protein processing	ECO:0000315	IMP	PMID:16207813		9606	has_regulation_target(UniProtKB:P13569)	20180305	P		UniProtKB	P05067:PRO_0000000092	APP	involved_in	GO:0090647	modulation of age-related behavioral decline	ECO:0000316	IGI	PMID:26005850	UniProtKB:Q7M6Y3	9606		20170522	P
UniProtKB	O95816	BAG2	involved_in	GO:0032091	negative regulation of protein binding	ECO:0000314	IDA	PMID:16207813		9606	has_regulation_target(UniProtKB:Q9UNE7),has_regulation_target(UniProtKB:P62837),negatively_regulates(GO:0061630)	20180305	P		UniProtKB	P05067:PRO_0000000092	APP	NOT|involved_in	GO:1902003	regulation of amyloid-beta formation	ECO:0000316	IGI	PMID:26005850	UniProtKB:Q7M6Y3	9606		20170522	P
UniProtKB	O95816	BAG2	involved_in	GO:0050821	protein stabilization	ECO:0000314	IDA	PMID:16207813		9606	has_regulation_target(UniProtKB:P13569)	20180305	P		UniProtKB	P05067:PRO_0000000092	APP	part_of	GO:0005769	early endosome	ECO:0000314	IDA	PMID:26005850		9606	part_of(CL:1001602)	20170522	C
UniProtKB	O95816	BAG2	involved_in	GO:1904667	negative regulation of ubiquitin protein ligase activity	ECO:0000314	IDA	PMID:16207813		9606	has_regulation_target(UniProtKB:Q9UNE7)	20180305	P		UniProtKB	P05067:PRO_0000000092	APP	part_of	GO:0070381	endosome to plasma membrane transport vesicle	ECO:0000314	IDA	PMID:26005850		9606	part_of(CL:1001602)	20170522	C
UniProtKB	O95816	BAG2	part_of	GO:0101031	chaperone complex	ECO:0000353	IPI	PMID:16207813	UniProtKB:P11142,UniProtKB:Q9UNE7	9606		20180305	C		UniProtKB	P05067:PRO_0000000093	APP	involved_in	GO:0032092	positive regulation of protein binding	ECO:0000314	IDA	PMID:26005850		9606	has_regulation_target(UniProtKB:O95782),has_regulation_target(UniProtKB:Q07954),regulates_o_occurs_in(UBERON:0013694)|has_regulation_target(UniProtKB:Q00610),has_regulation_target(UniProtKB:Q07954),regulates_o_occurs_in(UBERON:0013694)|has_regulation_target(UniProtKB:Q13492),has_regulation_target(UniProtKB:Q07954),regulates_o_occurs_in(UBERON:0013694)	20170522	P
UniProtKB	O95816	BAG2	colocalizes_with	GO:0005874	microtubule	ECO:0000250	ISS	PMID:19228967	UniProtKB:Q91YN9	9606	part_of(CL:0002608),part_of(GO:0030424)|part_of(CL:0002608),part_of(GO:0030425)	20180306	C		UniProtKB	P05067:PRO_0000000093	APP	part_of	GO:0005769	early endosome	ECO:0000314	IDA	PMID:26005850		9606	part_of(CL:1001602)	20170522	C
UniProtKB	O95816	BAG2	colocalizes_with	GO:1901588	dendritic microtubule	ECO:0000250	ISS	PMID:19228967	UniProtKB:Q91YN9	9606	part_of(CL:0002608)	20180306	C		UniProtKB	P05067:PRO_0000000093	APP	part_of	GO:0070381	endosome to plasma membrane transport vesicle	ECO:0000314	IDA	PMID:26005850		9606	part_of(CL:1001602)	20170522	C
UniProtKB	O95816	BAG2	involved_in	GO:0031397	negative regulation of protein ubiquitination	ECO:0000250	ISS	PMID:19228967	UniProtKB:Q91YN9	9606	has_regulation_target(UniProtKB:P10636)	20180306	P		UniProtKB	P05067	APP	involved_in	GO:0010628	positive regulation of gene expression	ECO:0000316	IGI	PMID:27853422	UniProtKB:P49768	9606	regulates_expression_of(ENSEMBL:ENSG00000067900),regulates(GO:0006914)	20171206	P
UniProtKB	O95816	BAG2	involved_in	GO:1901800	positive regulation of proteasomal protein catabolic process	ECO:0000250	ISS	PMID:19228967	UniProtKB:Q91YN9	9606	has_regulation_target(UniProtKB:P10636),has_regulation_target(PR:000037070),occurs_in(CL:0002608),regulates_o_occurs_in(CL:0002608)	20180306	P		UniProtKB	P05067	APP	involved_in	GO:0010629	negative regulation of gene expression	ECO:0000316	IGI	PMID:27853422	UniProtKB:P49768	9606	regulates_expression_of(ENSEMBL:ENSG00000126581),regulates(GO:0006914)	20171206	P
UniProtKB	O95816	BAG2	NOT|involved_in	GO:0032436	positive regulation of proteasomal ubiquitin-dependent protein catabolic process	ECO:0000250	ISS	PMID:19228967	UniProtKB:Q91YN9	9606		20180306	P		UniProtKB	P05067:PRO_0000000089	APP	involved_in	GO:0031175	neuron projection development	ECO:0000304	TAS	PMID:27853422		9606	causally_upstream_of(GO:0099177)	20171206	P
UniProtKB	O95816	BAG2	part_of	GO:0030424	axon	ECO:0000250	ISS	PMID:19228967	UniProtKB:Q91YN9	9606	part_of(CL:0002608)	20180306	C		UniProtKB	P05067:PRO_0000000093	APP	involved_in	GO:0010628	positive regulation of gene expression	ECO:0000315	IMP	PMID:27853422		9606	regulates_expression_of(ENSEMBL:ENSG00000067900)	20171206	P
UniProtKB	O95816	BAG2	part_of	GO:0030425	dendrite	ECO:0000250	ISS	PMID:19228967	UniProtKB:Q91YN9	9606	part_of(CL:0002608)	20180306	C		UniProtKB	P05067:PRO_0000000093	APP	colocalizes_with	GO:0034361	very-low-density lipoprotein particle	ECO:0000353	IPI	PMID:9211985	UniProtKB:P02649	9606		20170425	C
UniProtKB	O95816	BAG2	involved_in	GO:0031397	negative regulation of protein ubiquitination	ECO:0000314	IDA	PMID:24383081		9606	has_regulation_target(UniProtKB:Q9BXM7),part_of(GO:0050821)	20180306	P		UniProtKB	P05067:PRO_0000000093	APP	colocalizes_with	GO:0034362	low-density lipoprotein particle	ECO:0000353	IPI	PMID:9211985	UniProtKB:P02649	9606		20170425	C
UniProtKB	O95816	BAG2	involved_in	GO:0050821	protein stabilization	ECO:0000314	IDA	PMID:24383081		9606	has_regulation_target(UniProtKB:Q9BXM7)	20180306	P		UniProtKB	P05067:PRO_0000000093	APP	colocalizes_with	GO:0034363	intermediate-density lipoprotein particle	ECO:0000353	IPI	PMID:9211985	UniProtKB:P02649	9606		20170425	C
UniProtKB	O95816	BAG2	involved_in	GO:0031397	negative regulation of protein ubiquitination	ECO:0000314	IDA	PMID:25006867		9606	has_regulation_target(UniProtKB:P54252)	20180306	P		UniProtKB	P05067:PRO_0000000093	APP	colocalizes_with	GO:0034364	high-density lipoprotein particle	ECO:0000353	IPI	PMID:9211985	UniProtKB:P02647	9606		20170425	C
UniProtKB	O95816	BAG2	involved_in	GO:0050821	protein stabilization	ECO:0000314	IDA	PMID:25006867		9606	has_regulation_target(UniProtKB:P54252)	20180306	P		UniProtKB	P05067:PRO_0000000093	APP	enables	GO:0034185	apolipoprotein binding	ECO:0000353	IPI	PMID:9211985	UniProtKB:P02647	9606	occurs_in(GO:0034364)	20170425	F
UniProtKB	O95816	BAG2	enables	GO:0048156	tau protein binding	ECO:0000303	NAS	PMID:28386764		9606		20181030	F		UniProtKB	P05067:PRO_0000000093	APP	enables	GO:0034185	apolipoprotein binding	ECO:0000353	IPI	PMID:9211985	UniProtKB:P02649	9606	occurs_in(GO:0034362)|occurs_in(GO:0034363)|occurs_in(GO:0034361)	20170425	F
UniProtKB	Q9UL15	BAG5	involved_in	GO:0031397	negative regulation of protein ubiquitination	ECO:0000314	IDA	PMID:25006867		9606	has_regulation_target(UniProtKB:P54252)	20180306	P		UniProtKB	P05067:PRO_0000000093	APP	enables	GO:0034185	apolipoprotein binding	ECO:0000353	IPI	PMID:9211985	UniProtKB:P04639	9606	occurs_in(GO:0034362)|occurs_in(GO:0034363)|occurs_in(GO:0034361)|occurs_in(GO:0034364)	20170425	F
UniProtKB	Q9UL15	BAG5	involved_in	GO:0050821	protein stabilization	ECO:0000314	IDA	PMID:25006867		9606	has_regulation_target(UniProtKB:P54252)	20180306	P		UniProtKB	P05067:PRO_0000000093	APP	enables	GO:0034185	apolipoprotein binding	ECO:0000353	IPI	PMID:9211985	UniProtKB:P09809	9606	occurs_in(GO:0034364)	20170425	F
UniProtKB	Q07812	BAX	colocalizes_with	GO:0071944	cell periphery	ECO:0000314	IDA	PMID:21803450		9606	part_of(GO:0042981)	20170201	C		UniProtKB	P05067:PRO_0000000093	APP	enables	GO:0034185	apolipoprotein binding	ECO:0000353	IPI	PMID:9211985	UniProtKB:P18287	9606	occurs_in(GO:0034362)|occurs_in(GO:0034363)|occurs_in(GO:0034361)	20170425	F
UniProtKB	O43521	BCL2L11	involved_in	GO:0042981	regulation of apoptotic process	ECO:0000304	TAS	PMID:20371704		9606	part_of(GO:0071385)	20171027	P		UniProtKB	P05067:PRO_0000000093	APP	involved_in	GO:0042157	lipoprotein metabolic process	ECO:0000305	IC	PMID:9211985	GO:0034185,GO:0034361,GO:0034362,GO:0034363,GO:0034364	9606		20170425	P
UniProtKB	O43521	BCL2L11	involved_in	GO:0071385	cellular response to glucocorticoid stimulus	ECO:0000304	TAS	PMID:20371704		9606		20171027	P		UniProtKB	P05067:PRO_0000000093	APP	enables	GO:0051087	chaperone binding	ECO:0000353	IPI	PMID:9228033	UniProtKB:P10909	9606		20170502	F
UniProtKB	Q14457	BECN1	enables	GO:0019901	protein kinase binding	ECO:0000353	IPI	PMID:27853422	UniProtKB:Q13464	9606	positively_regulates(GO:0097242),positively_regulates(GO:0006914)	20171206	F		UniProtKB	P05067:PRO_0000000093	APP	part_of	GO:0032991	protein-containing complex	ECO:0000314	IDA	PMID:9228033		9606		20170502	C
UniProtKB	Q96G01	BICD1	colocalizes_with	GO:0005794	Golgi apparatus	ECO:0000314	IDA	PMID:17139249		9606	part_of(GO:0048471)	20171016	C		UniProtKB	Q7LC44	ARC	involved_in	GO:0007616	long-term memory	ECO:0000304	TAS	PMID:15537891		9606		20170711	P
UniProtKB	Q96G01	BICD1	enables	GO:0019901	protein kinase binding	ECO:0000353	IPI	PMID:17139249	UniProtKB:P49841	9606		20171016	F		UniProtKB	Q7LC44	ARC	involved_in	GO:0060291	long-term synaptic potentiation	ECO:0000304	TAS	PMID:15537891		9606		20170711	P
UniProtKB	Q96G01	BICD1	enables	GO:0045505	dynein intermediate chain binding	ECO:0000314	IDA	PMID:17139249		9606		20171016	F		UniProtKB	Q7LC44	ARC	part_of	GO:0043025	neuronal cell body	ECO:0000304	TAS	PMID:15537891		9606	part_of(CL:0002608)	20170711	C
UniProtKB	Q96G01	BICD1	involved_in	GO:0070507	regulation of microtubule cytoskeleton organization	ECO:0000316	IGI	PMID:17139249	UniProtKB:Q8TD16	9606		20171016	P		UniProtKB	Q7LC44	ARC	involved_in	GO:0060997	dendritic spine morphogenesis	ECO:0000304	TAS	PMID:15537891		9606	occurs_at(GO:0098938)	20170712	P
UniProtKB	Q96G01	BICD1	part_of	GO:0005813	centrosome	ECO:0000315	IMP	PMID:17139249		9606	part_of(GO:0048471)	20171016	C		UniProtKB	Q63053	Arc	involved_in	GO:0061001	regulation of dendritic spine morphogenesis	ECO:0000316	IGI	PMID:15537891	ComplexPortal:CPX-1134	10116	regulates_o_occurs_in(CL:0002608)	20170712	P
UniProtKB	Q96G01	BICD1	part_of	GO:0048471	perinuclear region of cytoplasm	ECO:0000315	IMP	PMID:17139249		9606		20171016	C		UniProtKB	O14497	ARID1A	involved_in	GO:0071277	cellular response to calcium ion	ECO:0007007	HEP	PMID:21237226		9606	occurs_in(GO:0005634)	20180307	P
UniProtKB	Q96G01	BICD1	enables	GO:0034452	dynactin binding	ECO:0000353	IPI	PMID:17139249	UniProtKB:Q13561|UniProtKB:Q14203	9606		20171017	F		UniProtKB	P13637	ATP1A3	enables	GO:0005391	sodium:potassium-exchanging ATPase activity	ECO:0000303	NAS	PMID:26224839		9606		20170329	F
UniProtKB	Q96G01	BICD1	involved_in	GO:1904781	positive regulation of protein localization to centrosome	ECO:0000316	IGI	PMID:17139249	UniProtKB:Q8TD16	9606	has_direct_input(UniProtKB:Q8N4C6),regulates(GO:0000226)	20171017	P		UniProtKB	P13637	ATP1A3	involved_in	GO:0060075	regulation of resting membrane potential	ECO:0000304	TAS	PMID:26224839		9606	occurs_in(CL:0000540)	20170329	P
UniProtKB	Q8TD16	BICD2	involved_in	GO:0070507	regulation of microtubule cytoskeleton organization	ECO:0000316	IGI	PMID:17139249	UniProtKB:Q96G01	9606		20171016	P		UniProtKB	P13637	ATP1A3	part_of	GO:0005890	sodium:potassium-exchanging ATPase complex	ECO:0000303	NAS	PMID:26224839		9606		20170329	C
UniProtKB	Q8TD16	BICD2	part_of	GO:0005737	cytoplasm	ECO:0000315	IMP	PMID:17139249		9606		20171016	C		UniProtKB	P06687	Atp1a3	enables	GO:0005391	sodium:potassium-exchanging ATPase activity	ECO:0000303	NAS	PMID:26224839		10116		20170329	F
UniProtKB	Q8TD16	BICD2	part_of	GO:0005813	centrosome	ECO:0000315	IMP	PMID:17139249		9606		20171016	C		UniProtKB	P06687	Atp1a3	part_of	GO:0005890	sodium:potassium-exchanging ATPase complex	ECO:0000303	NAS	PMID:26224839		10116		20170329	C
UniProtKB	O00499	BIN1	involved_in	GO:0030838	positive regulation of actin filament polymerization	ECO:0000250	ISS	GO_REF:0000024	UniProtKB:O08539	9606	occurs_in(CL:0000746),part_of(GO:0033292),regulates_o_occurs_in(CL:0000746)	20180510	P		UniProtKB	P06687	Atp1a3	part_of	GO:0016020	membrane	ECO:0000314	IDA	PMID:26224839		10116	part_of(CL:0002608),exists_during(UBERON:0000066)|part_of(CL:1001611),exists_during(UBERON:0000066)	20170329	C
UniProtKB	O00499	BIN1	involved_in	GO:0033292	T-tubule organization	ECO:0000250	ISS	GO_REF:0000024	UniProtKB:O08539	9606	occurs_in(CL:0000746)	20180510	P		UniProtKB	P13637	ATP1A3	part_of	GO:0030424	axon	ECO:0000314	IDA	PMID:26224839		9606	part_of(CL:0000598),part_of(UBERON:0001869)|part_of(UBERON:0013693)	20170405	C
UniProtKB	O00499	BIN1	involved_in	GO:0086091	regulation of heart rate by cardiac conduction	ECO:0000250	ISS	GO_REF:0000024	UniProtKB:O08539	9606	occurs_in(CL:0000746),regulates_o_occurs_in(CL:0000746)	20180510	P		UniProtKB	P13637	ATP1A3	part_of	GO:0032809	neuronal cell body membrane	ECO:0000305	IC	PMID:26224839	GO:0043025	9606	part_of(CL:0000598),part_of(UBERON:0001869)	20170405	C
UniProtKB	O00499	BIN1	involved_in	GO:1901380	negative regulation of potassium ion transmembrane transport	ECO:0000250	ISS	GO_REF:0000024	UniProtKB:O08539	9606	occurs_in(CL:0000746),regulates_o_occurs_in(CL:0000746),occurs_at(GO:1902937)	20180510	P		UniProtKB	P13637	ATP1A3	part_of	GO:0043025	neuronal cell body	ECO:0000314	IDA	PMID:26224839		9606	part_of(CL:0000598),part_of(UBERON:0001869)	20170405	C
UniProtKB	O00499	BIN1	involved_in	GO:1903946	negative regulation of ventricular cardiac muscle cell action potential	ECO:0000250	ISS	GO_REF:0000024	UniProtKB:O08539	9606	occurs_in(CL:0000746),regulates_o_occurs_in(CL:0000746),occurs_at(GO:1902937),part_of(GO:1901380)	20180510	P		UniProtKB	P13637	ATP1A3	enables	GO:0001540	amyloid-beta binding	ECO:0000314	IDA	PMID:26224839		9606	occurs_in(CL:0002608),happens_during(UBERON:0000066)|occurs_in(CL:1001611),happens_during(UBERON:0000066)	20170831	F
UniProtKB	O00499	BIN1	involved_in	GO:1904878	negative regulation of calcium ion transmembrane transport via high voltage-gated calcium channel	ECO:0000250	ISS	GO_REF:0000024	UniProtKB:O08539	9606	occurs_in(CL:0000746),regulates_o_occurs_in(CL:0000746)	20180510	P		UniProtKB	P13637	ATP1A3	involved_in	GO:1990535	neuron projection maintenance	ECO:0000316	IGI	PMID:26224839	UniProtKB:P05067	9606	occurs_at(CL:0002608)	20170831	P
UniProtKB	O00499	BIN1	part_of	GO:0030315	T-tubule	ECO:0000250	ISS	GO_REF:0000024	UniProtKB:O08539	9606	part_of(CL:0000746)	20180510	C		UniProtKB	P06687	Atp1a3	enables	GO:0001540	amyloid-beta binding	ECO:0000314	IDA	PMID:26224839		10116	occurs_in(CL:0002608),happens_during(UBERON:0000066)|occurs_in(CL:1001611),happens_during(UBERON:0000066)	20170831	F
UniProtKB	O00499	BIN1	involved_in	GO:0006897	endocytosis	ECO:0000304	TAS	PMID:23399914		9606		20180205	P		UniProtKB	P06687	Atp1a3	involved_in	GO:1904646	cellular response to amyloid-beta	ECO:0000314	IDA	PMID:26224839		10116	occurs_in(CL:0002608),happens_during(UBERON:0000066),occurs_in(GO:0016020),causally_upstream_of(GO:1903407)	20170831	P
UniProtKB	O00499	BIN1	involved_in	GO:0007010	cytoskeleton organization	ECO:0000304	TAS	PMID:23399914		9606		20180205	P		UniProtKB	P56817	BACE1	enables	GO:0005515	protein binding	ECO:0000353	IPI	PMID:17573534	UniProtKB:P04925	9606		20170516	F
UniProtKB	O00499	BIN1	colocalizes_with	GO:0005856	cytoskeleton	ECO:0000314	IDA	PMID:25051234		9606	part_of(UBERON:0000955)	20180205	C		UniProtKB	P56818	Bace1	involved_in	GO:0007613	memory	ECO:0000304	TAS	PMID:19118188		10090		20170424	P
UniProtKB	O00499	BIN1	enables	GO:0030276	clathrin binding	ECO:0000304	TAS	PMID:25051234		9606	occurs_in(CL:0000540)	20180205	F		UniProtKB	P56818	Bace1	involved_in	GO:0048167	regulation of synaptic plasticity	ECO:0000304	TAS	PMID:19118188		10090		20170424	P
UniProtKB	O00499	BIN1	enables	GO:0048156	tau protein binding	ECO:0000353	IPI	PMID:25051234	UniProtKB:P10636	9606		20180205	F		UniProtKB	P56818	Bace1	involved_in	GO:0050804	modulation of chemical synaptic transmission	ECO:0000304	TAS	PMID:20943921		10090	regulates_o_occurs_in(GO:0097471)	20170112	P
UniProtKB	O00499	BIN1	enables	GO:0051087	chaperone binding	ECO:0000353	IPI	PMID:25051234	UniProtKB:P10909	9606		20180205	F		UniProtKB	P56818	Bace1	involved_in	GO:0050804	modulation of chemical synaptic transmission	ECO:0000316	IGI	PMID:20943921	UniProtKB:P49582	10090		20170112	P
UniProtKB	O00499	BIN1	involved_in	GO:0006897	endocytosis	ECO:0000304	TAS	PMID:25051234		9606	occurs_in(CL:0000540)	20180205	P		UniProtKB	P56817	BACE1	part_of	GO:0005769	early endosome	ECO:0000314	IDA	PMID:24305806		9606		20180111	C
UniProtKB	O00499	BIN1	part_of	GO:0005634	nucleus	ECO:0000314	IDA	PMID:25051234		9606	part_of(UBERON:0000955)	20180205	C		UniProtKB	P56817	BACE1	enables	GO:0005515	protein binding	ECO:0000353	IPI	PMID:27179792	UniProtKB:O00499	9606		20180205	F
UniProtKB	O00499	BIN1	part_of	GO:0005737	cytoplasm	ECO:0000314	IDA	PMID:25051234		9606	part_of(CL:0000540),part_of(UBERON:0000955)|part_of(CL:0000127),part_of(UBERON:0000955)	20180205	C		UniProtKB	Q99933	BAG1	enables	GO:0031625	ubiquitin protein ligase binding	ECO:0000353	IPI	PMID:16207813	UniProtKB:Q9UNE7	9606		20180305	F
UniProtKB	O00499	BIN1	part_of	GO:0016020	membrane	ECO:0000314	IDA	PMID:25051234		9606	part_of(UBERON:0000955)	20180205	C		UniProtKB	O95816	BAG2	enables	GO:0005515	protein binding	ECO:0000353	IPI	PMID:16207813	UniProtKB:P11142	9606		20180305	F
UniProtKB	O00499	BIN1	enables	GO:0002020	protease binding	ECO:0000353	IPI	PMID:27179792	UniProtKB:P56817	9606		20180205	F		UniProtKB	O95816	BAG2	enables	GO:0044325	ion channel binding	ECO:0000353	IPI	PMID:16207813	UniProtKB:P13569	9606	part_of(GO:0050821)	20180305	F
UniProtKB	O00499	BIN1	involved_in	GO:0008333	endosome to lysosome transport	ECO:0000315	IMP	PMID:27179792		9606	has_input(UniProtKB:P56817),has_agent(GO:0005769)	20180205	P		UniProtKB	O95816	BAG2	enables	GO:0051087	chaperone binding	ECO:0000353	IPI	PMID:16207813	UniProtKB:P11142	9606		20180305	F
UniProtKB	O00499	BIN1	involved_in	GO:1902430	negative regulation of amyloid-beta formation	ECO:0000315	IMP	PMID:27179792		9606	has_regulation_target(UniProtKB:P56817),has_output(UniProtKB:P05067:PRO_0000000092),has_output(UniProtKB:P05067:PRO_0000000093)	20180205	P		UniProtKB	O95816	BAG2	involved_in	GO:0010954	positive regulation of protein processing	ECO:0000315	IMP	PMID:16207813		9606	has_regulation_target(UniProtKB:P13569)	20180305	P
UniProtKB	O00499	BIN1	involved_in	GO:1902960	negative regulation of aspartic-type endopeptidase activity involved in amyloid precursor protein catabolic process	ECO:0000315	IMP	PMID:27179792		9606	has_regulation_target(UniProtKB:P56817),has_output(UniProtKB:P05067:PRO_0000000092),has_output(UniProtKB:P05067:PRO_0000000093)	20180205	P		UniProtKB	O95816	BAG2	involved_in	GO:0032091	negative regulation of protein binding	ECO:0000314	IDA	PMID:16207813		9606	has_regulation_target(UniProtKB:Q9UNE7),has_regulation_target(UniProtKB:P62837),negatively_regulates(GO:0061630)	20180305	P
UniProtKB	O00499	BIN1	part_of	GO:0016020	membrane	ECO:0000304	TAS	PMID:28755476		9606		20180205	C		UniProtKB	O95816	BAG2	involved_in	GO:0050821	protein stabilization	ECO:0000314	IDA	PMID:16207813		9606	has_regulation_target(UniProtKB:P13569)	20180305	P
UniProtKB	O00499-1	BIN1	enables	GO:0048156	tau protein binding	ECO:0000353	IPI	PMID:28755476	UniProtKB:P10636	9606		20180205	F		UniProtKB	O95816	BAG2	involved_in	GO:1904667	negative regulation of ubiquitin protein ligase activity	ECO:0000314	IDA	PMID:16207813		9606	has_regulation_target(UniProtKB:Q9UNE7)	20180305	P
UniProtKB	O00499-9	BIN1	enables	GO:0048156	tau protein binding	ECO:0000353	IPI	PMID:28755476	UniProtKB:P10636	9606		20180219	F		UniProtKB	O95816	BAG2	part_of	GO:0101031	chaperone complex	ECO:0000353	IPI	PMID:16207813	UniProtKB:P11142,UniProtKB:Q9UNE7	9606		20180305	C
UniProtKB	O00499	BIN1	enables	GO:0048156	tau protein binding	ECO:0000303	NAS	PMID:28386764		9606		20181030	F		UniProtKB	O95816	BAG2	colocalizes_with	GO:0005874	microtubule	ECO:0000250	ISS	PMID:19228967	UniProtKB:Q91YN9	9606	part_of(CL:0002608),part_of(GO:0030424)|part_of(CL:0002608),part_of(GO:0030425)	20180306	C
UniProtKB	Q8TDC3	BRSK1	enables	GO:0004674	protein serine/threonine kinase activity	ECO:0000250	ISS	GO_REF:0000024	UniProtKB:B2DD29	9606	occurs_in(GO:0150034),occurs_in(CL:0002608)	20180309	F		UniProtKB	O95816	BAG2	colocalizes_with	GO:1901588	dendritic microtubule	ECO:0000250	ISS	PMID:19228967	UniProtKB:Q91YN9	9606	part_of(CL:0002608)	20180306	C
UniProtKB	Q8TDC3	BRSK1	part_of	GO:0150034	distal axon	ECO:0000250	ISS	GO_REF:0000024	UniProtKB:B2DD29	9606	part_of(CL:0002608)	20180309	C		UniProtKB	O95816	BAG2	involved_in	GO:0031397	negative regulation of protein ubiquitination	ECO:0000250	ISS	PMID:19228967	UniProtKB:Q91YN9	9606	has_regulation_target(UniProtKB:P10636)	20180306	P
UniProtKB	Q8TDC3	BRSK1	involved_in	GO:0010975	regulation of neuron projection development	ECO:0000250	ISS	GO_REF:0000024	UniProtKB:Q5RJI5	9606	occurs_in(CL:0002608)	20180313	P		UniProtKB	O95816	BAG2	involved_in	GO:1901800	positive regulation of proteasomal protein catabolic process	ECO:0000250	ISS	PMID:19228967	UniProtKB:Q91YN9	9606	has_regulation_target(UniProtKB:P10636),has_regulation_target(PR:000037070),occurs_in(CL:0002608),regulates_o_occurs_in(CL:0002608)	20180306	P
UniProtKB	Q8TDC3	BRSK1	involved_in	GO:0030010	establishment of cell polarity	ECO:0000250	ISS	GO_REF:0000024	UniProtKB:Q5RJI5	9606	occurs_in(CL:0000117),occurs_in(UBERON:0000956)|occurs_in(CL:0000117),occurs_in(UBERON:0002421)	20180313	P		UniProtKB	O95816	BAG2	NOT|involved_in	GO:0032436	positive regulation of proteasomal ubiquitin-dependent protein catabolic process	ECO:0000250	ISS	PMID:19228967	UniProtKB:Q91YN9	9606		20180306	P
UniProtKB	Q8TDC3	BRSK1	involved_in	GO:0030182	neuron differentiation	ECO:0000250	ISS	GO_REF:0000024	UniProtKB:Q5RJI5	9606	occurs_in(UBERON:0000956),results_in_acquisition_of_features_of(CL:0000117)|occurs_in(UBERON:0002421),results_in_acquisition_of_features_of(CL:0000117)	20180313	P		UniProtKB	O95816	BAG2	part_of	GO:0030424	axon	ECO:0000250	ISS	PMID:19228967	UniProtKB:Q91YN9	9606	part_of(CL:0002608)	20180306	C
UniProtKB	Q8TDC3	BRSK1	involved_in	GO:0050770	regulation of axonogenesis	ECO:0000250	ISS	GO_REF:0000024	UniProtKB:Q5RJI5	9606	occurs_in(CL:0002608)	20180313	P		UniProtKB	O95816	BAG2	part_of	GO:0030425	dendrite	ECO:0000250	ISS	PMID:19228967	UniProtKB:Q91YN9	9606	part_of(CL:0002608)	20180306	C
UniProtKB	Q8TDC3	BRSK1	involved_in	GO:0090176	microtubule cytoskeleton organization involved in establishment of planar polarity	ECO:0000250	ISS	GO_REF:0000024	UniProtKB:Q5RJI5	9606	occurs_in(CL:0002608),regulates(GO:0031175),regulates(GO:0007409)	20180313	P		UniProtKB	Q91YN9	Bag2	colocalizes_with	GO:0005874	microtubule	ECO:0000314	IDA	PMID:19228967		10090	part_of(CL:0002608),part_of(GO:0030424)|part_of(CL:0002608),part_of(GO:0030425)	20180306	C
UniProtKB	Q8TDC3	BRSK1	involved_in	GO:0008306	associative learning	ECO:0000250	ISS	GO_REF:0000024	UniProtKB:Q5RJI5	9606		20180314	P		UniProtKB	Q91YN9	Bag2	colocalizes_with	GO:1901588	dendritic microtubule	ECO:0000314	IDA	PMID:19228967		10090	part_of(CL:0002608)	20180306	C
UniProtKB	Q8TDC3	BRSK1	involved_in	GO:0048167	regulation of synaptic plasticity	ECO:0000250	ISS	GO_REF:0000024	UniProtKB:Q5RJI5	9606	regulates_o_occurs_in(UBERON:0003881),regulates_o_occurs_in(UBERON:0003882),regulates_o_occurs_in(UBERON:0003883)	20180314	P		UniProtKB	Q91YN9	Bag2	enables	GO:0031072	heat shock protein binding	ECO:0000353	IPI	PMID:19228967	UniProtKB:P14659	10090	occurs_in(CL:0002608)|occurs_in(CL:0002609)	20180306	F
UniProtKB	Q8TDC3	BRSK1	involved_in	GO:0099504	synaptic vesicle cycle	ECO:0000250	ISS	GO_REF:0000024	UniProtKB:Q5RJI5	9606	occurs_in(UBERON:0003881),occurs_in(UBERON:0003882),occurs_in(UBERON:0003883)	20180314	P		UniProtKB	Q91YN9	Bag2	enables	GO:0031625	ubiquitin protein ligase binding	ECO:0000353	IPI	PMID:19228967	UniProtKB:D4A4T0	10090		20180306	F
UniProtKB	Q8TDC3	BRSK1	involved_in	GO:2000807	regulation of synaptic vesicle clustering	ECO:0000304	TAS	PMID:18268107		9606		20180313	P		UniProtKB	Q91YN9	Bag2	enables	GO:0048156	tau protein binding	ECO:0000353	IPI	PMID:19228967	UniProtKB:P19332	10090	occurs_in(CL:0002608)|occurs_in(CL:0002609)	20180306	F
UniProtKB	Q8TDC3	BRSK1	part_of	GO:0008021	synaptic vesicle	ECO:0000304	TAS	PMID:26444684		9606		20180314	C		UniProtKB	Q91YN9	Bag2	involved_in	GO:0031397	negative regulation of protein ubiquitination	ECO:0000316	IGI	PMID:19228967	UniProtKB:P10636	10090	has_regulation_target(UniProtKB:P10637)	20180306	P
UniProtKB	Q8TDC3	BRSK1	part_of	GO:0048786	presynaptic active zone	ECO:0000304	TAS	PMID:26444684		9606		20180314	C		UniProtKB	Q91YN9	Bag2	involved_in	GO:1901800	positive regulation of proteasomal protein catabolic process	ECO:0000316	IGI	PMID:19228967	UniProtKB:P10636	10090	has_regulation_target(UniProtKB:P10637),has_regulation_target(PR:000037070),occurs_in(CL:0002608),regulates_o_occurs_in(CL:0002608)	20180306	P
UniProtKB	Q8TDC3	BRSK1	involved_in	GO:0006468	protein phosphorylation	ECO:0000304	TAS	PMID:27626661		9606	has_input(UniProtKB:Q86UR5)	20180516	P		UniProtKB	Q91YN9	Bag2	NOT|involved_in	GO:0032436	positive regulation of proteasomal ubiquitin-dependent protein catabolic process	ECO:0000316	IGI	PMID:19228967	UniProtKB:P10636	10090		20180306	P
UniProtKB	Q8TDC3	BRSK1	part_of	GO:0008021	synaptic vesicle	ECO:0000304	TAS	PMID:27626661		9606		20180516	C		UniProtKB	Q91YN9	Bag2	part_of	GO:0030424	axon	ECO:0000314	IDA	PMID:19228967		10090	part_of(CL:0002608)	20180306	C
UniProtKB	Q8TDC3	BRSK1	part_of	GO:0048786	presynaptic active zone	ECO:0000304	TAS	PMID:27626661		9606		20180516	C		UniProtKB	Q91YN9	Bag2	part_of	GO:0030425	dendrite	ECO:0000314	IDA	PMID:19228967		10090	part_of(CL:0002608)	20180306	C
UniProtKB	Q8TDC3	BRSK1	enables	GO:0048156	tau protein binding	ECO:0000303	NAS	PMID:28386764		9606		20181030	F		UniProtKB	O95816	BAG2	involved_in	GO:0031397	negative regulation of protein ubiquitination	ECO:0000314	IDA	PMID:24383081		9606	has_regulation_target(UniProtKB:Q9BXM7),part_of(GO:0050821)	20180306	P
UniProtKB	Q8TDC3	BRSK1	enables	GO:0050321	tau-protein kinase activity	ECO:0000303	NAS	PMID:28386764		9606		20181030	F		UniProtKB	O95816	BAG2	involved_in	GO:0050821	protein stabilization	ECO:0000314	IDA	PMID:24383081		9606	has_regulation_target(UniProtKB:Q9BXM7)	20180306	P
UniProtKB	Q8IWQ3	BRSK2	enables	GO:0004674	protein serine/threonine kinase activity	ECO:0000250	ISS	GO_REF:0000024	UniProtKB:D3ZML2	9606	occurs_in(GO:0150034),occurs_in(CL:0002608)	20180309	F		UniProtKB	O95816	BAG2	involved_in	GO:0031397	negative regulation of protein ubiquitination	ECO:0000314	IDA	PMID:25006867		9606	has_regulation_target(UniProtKB:P54252)	20180306	P
UniProtKB	Q8IWQ3	BRSK2	part_of	GO:0150034	distal axon	ECO:0000250	ISS	GO_REF:0000024	UniProtKB:D3ZML2	9606	part_of(CL:0002608)	20180309	C		UniProtKB	O95816	BAG2	involved_in	GO:0050821	protein stabilization	ECO:0000314	IDA	PMID:25006867		9606	has_regulation_target(UniProtKB:P54252)	20180306	P
UniProtKB	Q8IWQ3	BRSK2	involved_in	GO:0010975	regulation of neuron projection development	ECO:0000250	ISS	GO_REF:0000024	UniProtKB:Q69Z98	9606	occurs_in(CL:0002608)	20180313	P		UniProtKB	O95816	BAG2	enables	GO:0048156	tau protein binding	ECO:0000303	NAS	PMID:28386764		9606		20181030	F
UniProtKB	Q8IWQ3	BRSK2	involved_in	GO:0030010	establishment of cell polarity	ECO:0000250	ISS	GO_REF:0000024	UniProtKB:Q69Z98	9606	occurs_in(CL:0000117),occurs_in(UBERON:0000956)|occurs_in(CL:0000117),occurs_in(UBERON:0002421)	20180313	P		UniProtKB	Q9UL15	BAG5	involved_in	GO:0031397	negative regulation of protein ubiquitination	ECO:0000314	IDA	PMID:25006867		9606	has_regulation_target(UniProtKB:P54252)	20180306	P
UniProtKB	Q8IWQ3	BRSK2	involved_in	GO:0030182	neuron differentiation	ECO:0000250	ISS	GO_REF:0000024	UniProtKB:Q69Z98	9606	occurs_in(UBERON:0000956),results_in_acquisition_of_features_of(CL:0000117)|occurs_in(UBERON:0002421),results_in_acquisition_of_features_of(CL:0000117)	20180313	P		UniProtKB	Q9UL15	BAG5	involved_in	GO:0050821	protein stabilization	ECO:0000314	IDA	PMID:25006867		9606	has_regulation_target(UniProtKB:P54252)	20180306	P
UniProtKB	Q8IWQ3	BRSK2	involved_in	GO:0050770	regulation of axonogenesis	ECO:0000250	ISS	GO_REF:0000024	UniProtKB:Q69Z98	9606	occurs_in(CL:0002608)	20180313	P		UniProtKB	Q07812	BAX	colocalizes_with	GO:0071944	cell periphery	ECO:0000314	IDA	PMID:21803450		9606	part_of(GO:0042981)	20170201	C
UniProtKB	Q8IWQ3	BRSK2	involved_in	GO:0090176	microtubule cytoskeleton organization involved in establishment of planar polarity	ECO:0000250	ISS	GO_REF:0000024	UniProtKB:Q69Z98	9606	occurs_in(CL:0002608),regulates(GO:0031175),regulates(GO:0007409)	20180313	P		UniProtKB	O43521	BCL2L11	involved_in	GO:0042981	regulation of apoptotic process	ECO:0000304	TAS	PMID:20371704		9606	part_of(GO:0071385)	20171027	P
UniProtKB	Q8IWQ3	BRSK2	involved_in	GO:2000807	regulation of synaptic vesicle clustering	ECO:0000304	TAS	PMID:18268107		9606		20180313	P		UniProtKB	O43521	BCL2L11	involved_in	GO:0071385	cellular response to glucocorticoid stimulus	ECO:0000304	TAS	PMID:20371704		9606		20171027	P
UniProtKB	Q8IWQ3	BRSK2	enables	GO:0048156	tau protein binding	ECO:0000303	NAS	PMID:28386764		9606		20181030	F		UniProtKB	O54918	Bcl2l11	enables	GO:0019901	protein kinase binding	ECO:0000353	IPI	PMID:20371704	UniProtKB:Q2NL51	10090	part_of(GO:0071549)	20171027	F
UniProtKB	Q8IWQ3	BRSK2	enables	GO:0050321	tau-protein kinase activity	ECO:0000303	NAS	PMID:28386764		9606		20181030	F		UniProtKB	O54918	Bcl2l11	enables	GO:0019901	protein kinase binding	ECO:0000353	IPI	PMID:20371704	UniProtKB:Q9WV60	10090	part_of(GO:0071549)	20171027	F
UniProtKB	P01024	C3	involved_in	GO:0006911	phagocytosis, engulfment	ECO:0000250	ISS	GO_REF:0000024	UniProtKB:P01027	9606	has_input(GO:0106003),occurs_in(CL:0000129),part_of(GO:0097242)	20170605	P		UniProtKB	Q14457	BECN1	enables	GO:0019901	protein kinase binding	ECO:0000353	IPI	PMID:27853422	UniProtKB:Q13464	9606	positively_regulates(GO:0097242),positively_regulates(GO:0006914)	20171206	F
UniProtKB	P01024	C3	involved_in	GO:0097242	amyloid-beta clearance	ECO:0000250	ISS	GO_REF:0000024	UniProtKB:P01027	9606	has_input(GO:0106003),has_input(UniProtKB:P05067:PRO_0000000092),occurs_in(CL:0000129)	20170605	P		UniProtKB	Q96G01	BICD1	colocalizes_with	GO:0005794	Golgi apparatus	ECO:0000314	IDA	PMID:17139249		9606	part_of(GO:0048471)	20171016	C
UniProtKB	P01024	C3	involved_in	GO:0097242	amyloid-beta clearance	ECO:0000250	ISS	GO_REF:0000024	UniProtKB:P01027	9606	has_input(GO:0106003),occurs_in(CL:0000129)	20170605	P		UniProtKB	Q96G01	BICD1	enables	GO:0019901	protein kinase binding	ECO:0000353	IPI	PMID:17139249	UniProtKB:P49841	9606		20171016	F
UniProtKB	O00555	CACNA1A	part_of	GO:0043025	neuronal cell body	ECO:0000250	ISS	GO_REF:0000024	UniProtKB:P54282	9606	part_of(CL:0000121)	20170523	C		UniProtKB	Q96G01	BICD1	enables	GO:0045505	dynein intermediate chain binding	ECO:0000314	IDA	PMID:17139249		9606		20171016	F
UniProtKB	O00555	CACNA1A	involved_in	GO:1904645	response to amyloid-beta	ECO:0000314	IDA	PMID:18216187		9606	causally_upstream_of(GO:1901842)|causally_upstream_of(GO:1904878)|causally_upstream_of(GO:2000301)|causally_upstream_of(GO:0050804)	20170831	P		UniProtKB	Q96G01	BICD1	involved_in	GO:0070507	regulation of microtubule cytoskeleton organization	ECO:0000316	IGI	PMID:17139249	UniProtKB:Q8TD16	9606		20171016	P
UniProtKB	O00555	CACNA1A	enables	GO:0005245	voltage-gated calcium channel activity	ECO:0000316	IGI	PMID:21883149	UniProtKB:P54289,UniProtKB:Q02641	9606		20170523	F		UniProtKB	Q96G01	BICD1	part_of	GO:0005813	centrosome	ECO:0000315	IMP	PMID:17139249		9606	part_of(GO:0048471)	20171016	C
UniProtKB	O00555	CACNA1A	enables	GO:0008331	high voltage-gated calcium channel activity	ECO:0000314	IDA	PMID:21883149		9606		20170523	F		UniProtKB	Q96G01	BICD1	part_of	GO:0048471	perinuclear region of cytoplasm	ECO:0000315	IMP	PMID:17139249		9606		20171016	C
UniProtKB	O00555	CACNA1A	involved_in	GO:1904646	cellular response to amyloid-beta	ECO:0000314	IDA	PMID:21883149		9606	causally_upstream_of(GO:1904879)	20170831	P		UniProtKB	Q96G01	BICD1	enables	GO:0034452	dynactin binding	ECO:0000353	IPI	PMID:17139249	UniProtKB:Q13561|UniProtKB:Q14203	9606		20171017	F
UniProtKB	O00555	CACNA1A	involved_in	GO:1904646	cellular response to amyloid-beta	ECO:0000316	IGI	PMID:21883149	UniProtKB:P54289,UniProtKB:Q02641	9606	causally_upstream_of(GO:1901387)	20170831	P		UniProtKB	Q96G01	BICD1	involved_in	GO:1904781	positive regulation of protein localization to centrosome	ECO:0000316	IGI	PMID:17139249	UniProtKB:Q8TD16	9606	has_direct_input(UniProtKB:Q8N4C6),regulates(GO:0000226)	20171017	P
UniProtKB	O00555	CACNA1A	enables	GO:0001540	amyloid-beta binding	ECO:0000305	IC	PMID:23376566	GO:0050804,GO:1904645	9606		20181030	F		UniProtKB	Q8TD16	BICD2	involved_in	GO:0070507	regulation of microtubule cytoskeleton organization	ECO:0000316	IGI	PMID:17139249	UniProtKB:Q96G01	9606		20171016	P
UniProtKB	O00555	CACNA1A	enables	GO:0008331	high voltage-gated calcium channel activity	ECO:0000315	IMP	PMID:23376566		9606		20181030	F		UniProtKB	Q8TD16	BICD2	part_of	GO:0005737	cytoplasm	ECO:0000315	IMP	PMID:17139249		9606		20171016	C
UniProtKB	O00555	CACNA1A	involved_in	GO:1904645	response to amyloid-beta	ECO:0000314	IDA	PMID:23376566		9606		20181030	P		UniProtKB	Q8TD16	BICD2	part_of	GO:0005813	centrosome	ECO:0000315	IMP	PMID:17139249		9606		20171016	C
UniProtKB	O00555	CACNA1A	involved_in	GO:0050804	modulation of chemical synaptic transmission	ECO:0000314	IDA	PMID:23376566		9606	part_of(GO:1904645),occurs_in(UBERON:0002421)	20181030	P		UniProtKB	O00499	BIN1	involved_in	GO:0006897	endocytosis	ECO:0000304	TAS	PMID:23399914		9606		20180205	P
UniProtKB	Q00975	CACNA1B	enables	GO:0001540	amyloid-beta binding	ECO:0000305	IC	PMID:23376566	GO:0050804,GO:1904645	9606		20181030	F		UniProtKB	O00499	BIN1	involved_in	GO:0007010	cytoskeleton organization	ECO:0000304	TAS	PMID:23399914		9606		20180205	P
UniProtKB	Q00975	CACNA1B	enables	GO:0008331	high voltage-gated calcium channel activity	ECO:0000315	IMP	PMID:23376566		9606		20181030	F		UniProtKB	O08539	Bin1	involved_in	GO:0030838	positive regulation of actin filament polymerization	ECO:0000314	IDA	PMID:24836577		10090	occurs_in(CL:0000746),part_of(GO:0033292),regulates_o_occurs_in(CL:0000746)	20180510	P
UniProtKB	Q00975	CACNA1B	involved_in	GO:1904645	response to amyloid-beta	ECO:0000314	IDA	PMID:23376566		9606		20181030	P		UniProtKB	O08539	Bin1	involved_in	GO:0033292	T-tubule organization	ECO:0000315	IMP	PMID:24836577		10090	occurs_in(CL:0000746)	20180510	P
UniProtKB	Q00975	CACNA1B	involved_in	GO:0050804	modulation of chemical synaptic transmission	ECO:0000314	IDA	PMID:23376566		9606	part_of(GO:1904645),occurs_in(UBERON:0002421)	20181030	P		UniProtKB	O08539	Bin1	involved_in	GO:0086091	regulation of heart rate by cardiac conduction	ECO:0000315	IMP	PMID:24836577		10090	occurs_in(CL:0000746),regulates_o_occurs_in(CL:0000746)	20180510	P
UniProtKB	P54289	CACNA2D1	enables	GO:0005245	voltage-gated calcium channel activity	ECO:0000316	IGI	PMID:21883149	UniProtKB:O00555,UniProtKB:Q02641	9606		20170523	F		UniProtKB	O08539	Bin1	involved_in	GO:1901380	negative regulation of potassium ion transmembrane transport	ECO:0000315	IMP	PMID:24836577		10090	occurs_in(CL:0000746),regulates_o_occurs_in(CL:0000746),occurs_at(GO:1902937)	20180510	P
UniProtKB	P54289	CACNA2D1	involved_in	GO:1902514	regulation of calcium ion transmembrane transport via high voltage-gated calcium channel	ECO:0000316	IGI	PMID:21883149	UniProtKB:O00555,UniProtKB:P05067:PRO_0000000092,UniProtKB:Q02641	9606	has_regulation_target(UniProtKB:O00555)	20170831	P		UniProtKB	O08539	Bin1	involved_in	GO:1903946	negative regulation of ventricular cardiac muscle cell action potential	ECO:0000315	IMP	PMID:24836577		10090	occurs_in(CL:0000746),regulates_o_occurs_in(CL:0000746),occurs_at(GO:1902937),part_of(GO:1901380)	20180510	P
UniProtKB	P54289	CACNA2D1	involved_in	GO:1904646	cellular response to amyloid-beta	ECO:0000316	IGI	PMID:21883149	UniProtKB:O00555,UniProtKB:Q02641	9606	causally_upstream_of(GO:1901387)	20170831	P		UniProtKB	O08539	Bin1	involved_in	GO:1904878	negative regulation of calcium ion transmembrane transport via high voltage-gated calcium channel	ECO:0000315	IMP	PMID:24836577		10090	occurs_in(CL:0000746),regulates_o_occurs_in(CL:0000746)	20180510	P
UniProtKB	Q02641	CACNB1	enables	GO:0005245	voltage-gated calcium channel activity	ECO:0000316	IGI	PMID:21883149	UniProtKB:O00555,UniProtKB:P54289	9606		20170523	F		UniProtKB	O08539	Bin1	part_of	GO:0030315	T-tubule	ECO:0000314	IDA	PMID:24836577		10090	part_of(CL:0000746)	20180510	C
UniProtKB	Q02641	CACNB1	involved_in	GO:1902514	regulation of calcium ion transmembrane transport via high voltage-gated calcium channel	ECO:0000316	IGI	PMID:21883149	UniProtKB:O00555,UniProtKB:P05067:PRO_0000000092,UniProtKB:P54289	9606	has_regulation_target(UniProtKB:O00555)	20170831	P		UniProtKB	O00499	BIN1	colocalizes_with	GO:0005856	cytoskeleton	ECO:0000314	IDA	PMID:25051234		9606	part_of(UBERON:0000955)	20180205	C
UniProtKB	Q02641	CACNB1	involved_in	GO:1904646	cellular response to amyloid-beta	ECO:0000316	IGI	PMID:21883149	UniProtKB:O00555,UniProtKB:P54289	9606	causally_upstream_of(GO:1901387)	20170831	P		UniProtKB	O00499	BIN1	enables	GO:0030276	clathrin binding	ECO:0000304	TAS	PMID:25051234		9606	occurs_in(CL:0000540)	20180205	F
UniProtKB	P06881	CALCA	involved_in	GO:0097647	amylin receptor signaling pathway	ECO:0000316	IGI	PMID:22500019	ComplexPortal:CPX-2173	9606		20170524	P		UniProtKB	O00499	BIN1	enables	GO:0048156	tau protein binding	ECO:0000353	IPI	PMID:25051234	UniProtKB:P10636	9606		20180205	F
UniProtKB	P06881	CALCA	involved_in	GO:0097647	amylin receptor signaling pathway	ECO:0000316	IGI	PMID:22500019	UniProtKB:O60894,UniProtKB:P30988	9606		20170524	P		UniProtKB	O00499	BIN1	enables	GO:0051087	chaperone binding	ECO:0000353	IPI	PMID:25051234	UniProtKB:P10909	9606		20180205	F
UniProtKB	P30988	CALCR	contributes_to	GO:0097643	amylin receptor activity	ECO:0000316	IGI	PMID:22500019	UniProtKB:O60894,UniProtKB:P06881|UniProtKB:O60894,UniProtKB:P10997:PRO_0000004106|UniProtKB:O60894,UniProtKB:P12969:PRO_0000004122|UniProtKB:O60894,UniProtKB:P35318|UniProtKB:O60895,UniProtKB:P12969:PRO_0000004122|UniProtKB:O60895,UniProtKB:P35318|UniProtKB:O60896,UniProtKB:P10997:PRO_0000004106	9606		20170524	F		UniProtKB	O00499	BIN1	involved_in	GO:0006897	endocytosis	ECO:0000304	TAS	PMID:25051234		9606	occurs_in(CL:0000540)	20180205	P
UniProtKB	P30988	CALCR	involved_in	GO:0010628	positive regulation of gene expression	ECO:0000316	IGI	PMID:22500019	UniProtKB:O60896,UniProtKB:P10997:PRO_0000004106	9606	regulates_expression_of(ENSEMBL:ENSG00000170345)	20170524	P		UniProtKB	O00499	BIN1	part_of	GO:0005634	nucleus	ECO:0000314	IDA	PMID:25051234		9606	part_of(UBERON:0000955)	20180205	C
UniProtKB	P30988	CALCR	involved_in	GO:0010739	positive regulation of protein kinase A signaling	ECO:0000316	IGI	PMID:22500019	UniProtKB:O60896,UniProtKB:P10997:PRO_0000004106	9606	has_regulation_target(UniProtKB:P13861)	20170524	P		UniProtKB	O00499	BIN1	part_of	GO:0005737	cytoplasm	ECO:0000314	IDA	PMID:25051234		9606	part_of(CL:0000540),part_of(UBERON:0000955)|part_of(CL:0000127),part_of(UBERON:0000955)	20180205	C
UniProtKB	P30988	CALCR	involved_in	GO:0010942	positive regulation of cell death	ECO:0000316	IGI	PMID:22500019	UniProtKB:O60896,UniProtKB:P10997:PRO_0000004106	9606	regulates_expression_of(ENSEMBL:ENSG00000170345)	20170524	P		UniProtKB	O00499	BIN1	part_of	GO:0016020	membrane	ECO:0000314	IDA	PMID:25051234		9606	part_of(UBERON:0000955)	20180205	C
UniProtKB	P30988	CALCR	involved_in	GO:0033138	positive regulation of peptidyl-serine phosphorylation	ECO:0000316	IGI	PMID:22500019	UniProtKB:O60896,UniProtKB:P10997:PRO_0000004106	9606	has_regulation_target(UniProtKB:P13861)	20170524	P		UniProtKB	O00499	BIN1	enables	GO:0002020	protease binding	ECO:0000353	IPI	PMID:27179792	UniProtKB:P56817	9606		20180205	F
UniProtKB	P30988	CALCR	involved_in	GO:0051897	positive regulation of protein kinase B signaling	ECO:0000316	IGI	PMID:22500019	UniProtKB:O60896,UniProtKB:P10997:PRO_0000004106	9606		20170524	P		UniProtKB	O00499	BIN1	involved_in	GO:0008333	endosome to lysosome transport	ECO:0000315	IMP	PMID:27179792		9606	has_input(UniProtKB:P56817),has_agent(GO:0005769)	20180205	P
UniProtKB	P30988	CALCR	involved_in	GO:0070374	positive regulation of ERK1 and ERK2 cascade	ECO:0000316	IGI	PMID:22500019	UniProtKB:O60896,UniProtKB:P05067:PRO_0000000092	9606		20170524	P		UniProtKB	O00499	BIN1	involved_in	GO:1902430	negative regulation of amyloid-beta formation	ECO:0000315	IMP	PMID:27179792		9606	has_regulation_target(UniProtKB:P56817),has_output(UniProtKB:P05067:PRO_0000000092),has_output(UniProtKB:P05067:PRO_0000000093)	20180205	P
UniProtKB	P30988	CALCR	involved_in	GO:0070374	positive regulation of ERK1 and ERK2 cascade	ECO:0000316	IGI	PMID:22500019	UniProtKB:O60896,UniProtKB:P10997:PRO_0000004106	9606		20170524	P		UniProtKB	O00499	BIN1	involved_in	GO:1902960	negative regulation of aspartic-type endopeptidase activity involved in amyloid precursor protein catabolic process	ECO:0000315	IMP	PMID:27179792		9606	has_regulation_target(UniProtKB:P56817),has_output(UniProtKB:P05067:PRO_0000000092),has_output(UniProtKB:P05067:PRO_0000000093)	20180205	P
UniProtKB	P30988	CALCR	involved_in	GO:0097647	amylin receptor signaling pathway	ECO:0000316	IGI	PMID:22500019	ComplexPortal:CPX-2173	9606		20170524	P		UniProtKB	O08539	Bin1	involved_in	GO:1902430	negative regulation of amyloid-beta formation	ECO:0000315	IMP	PMID:27179792		10090	has_regulation_target(UniProtKB:P56818),occurs_in(CL:0002609),has_output(UniProtKB:P12023:PRO_0000000116),has_output(UniProtKB:P12023:PRO_0000000118),has_output(UniProtKB:P12023:PRO_0000000119)	20180205	P
UniProtKB	P30988	CALCR	involved_in	GO:0097647	amylin receptor signaling pathway	ECO:0000316	IGI	PMID:22500019	UniProtKB:O60894,UniProtKB:P06881	9606		20170524	P		UniProtKB	O08539	Bin1	involved_in	GO:1902960	negative regulation of aspartic-type endopeptidase activity involved in amyloid precursor protein catabolic process	ECO:0000315	IMP	PMID:27179792		10090	has_regulation_target(UniProtKB:P56818),occurs_in(CL:0002609),has_output(UniProtKB:P12023:PRO_0000000116),has_output(UniProtKB:P12023:PRO_0000000118),has_output(UniProtKB:P12023:PRO_0000000119)	20180205	P
UniProtKB	P30988	CALCR	involved_in	GO:0097647	amylin receptor signaling pathway	ECO:0000316	IGI	PMID:22500019	UniProtKB:O60894,UniProtKB:P10997:PRO_0000004106	9606		20170524	P		UniProtKB	O00499	BIN1	part_of	GO:0016020	membrane	ECO:0000304	TAS	PMID:28755476		9606		20180205	C
UniProtKB	P30988	CALCR	involved_in	GO:0097647	amylin receptor signaling pathway	ECO:0000316	IGI	PMID:22500019	UniProtKB:O60894,UniProtKB:P12969:PRO_0000004122	9606		20170524	P		UniProtKB	O00499-1	BIN1	enables	GO:0048156	tau protein binding	ECO:0000353	IPI	PMID:28755476	UniProtKB:P10636	9606		20180205	F
UniProtKB	P30988	CALCR	involved_in	GO:0097647	amylin receptor signaling pathway	ECO:0000316	IGI	PMID:22500019	UniProtKB:O60894,UniProtKB:P35318	9606		20170524	P		UniProtKB	O00499-9	BIN1	enables	GO:0048156	tau protein binding	ECO:0000353	IPI	PMID:28755476	UniProtKB:P10636	9606		20180219	F
UniProtKB	P30988	CALCR	involved_in	GO:0097647	amylin receptor signaling pathway	ECO:0000316	IGI	PMID:22500019	UniProtKB:O60895,UniProtKB:P12969:PRO_0000004122	9606		20170524	P		UniProtKB	O00499	BIN1	enables	GO:0048156	tau protein binding	ECO:0000303	NAS	PMID:28386764		9606		20181030	F
UniProtKB	P30988	CALCR	involved_in	GO:0097647	amylin receptor signaling pathway	ECO:0000316	IGI	PMID:22500019	UniProtKB:O60895,UniProtKB:P35318	9606		20170524	P		UniProtKB	Q8TDC3	BRSK1	involved_in	GO:2000807	regulation of synaptic vesicle clustering	ECO:0000304	TAS	PMID:18268107		9606		20180313	P
UniProtKB	P30988	CALCR	involved_in	GO:0097647	amylin receptor signaling pathway	ECO:0000316	IGI	PMID:22500019	UniProtKB:O60896,UniProtKB:P10997:PRO_0000004106	9606		20170524	P		UniProtKB	Q5RJI5	Brsk1	involved_in	GO:0010975	regulation of neuron projection development	ECO:0000316	IGI	PMID:18268107	UniProtKB:Q69Z98	10090	occurs_in(CL:0002608)	20180313	P
UniProtKB	P30988	CALCR	involved_in	GO:1905665	positive regulation of calcium ion import across plasma membrane	ECO:0000316	IGI	PMID:22500019	UniProtKB:O60896,UniProtKB:P10997:PRO_0000004106	9606		20170524	P		UniProtKB	Q5RJI5	Brsk1	involved_in	GO:0050770	regulation of axonogenesis	ECO:0000316	IGI	PMID:18268107	UniProtKB:Q69Z98	10090	occurs_in(CL:0002608)	20180313	P
UniProtKB	P30988	CALCR	involved_in	GO:0010942	positive regulation of cell death	ECO:0000316	IGI	PMID:22500019	ComplexPortal:CPX-1134,UniProtKB:O60896	9606		20170628	P		UniProtKB	Q5RJI5	Brsk1	involved_in	GO:0090176	microtubule cytoskeleton organization involved in establishment of planar polarity	ECO:0000316	IGI	PMID:18268107	UniProtKB:Q69Z98	10090	occurs_in(CL:0002608),regulates(GO:0031175),regulates(GO:0007409)	20180313	P
UniProtKB	P30988	CALCR	involved_in	GO:0033138	positive regulation of peptidyl-serine phosphorylation	ECO:0000316	IGI	PMID:22500019	ComplexPortal:CPX-1134,UniProtKB:O60896	9606	has_regulation_target(UniProtKB:P13861)	20170628	P		UniProtKB	B2DD29	Brsk1	enables	GO:0004674	protein serine/threonine kinase activity	ECO:0000315	IMP	PMID:25788287		10116	occurs_in(GO:0150034),occurs_in(CL:0002608)	20180309	F
UniProtKB	P30988	CALCR	involved_in	GO:0051897	positive regulation of protein kinase B signaling	ECO:0000316	IGI	PMID:22500019	ComplexPortal:CPX-1134,UniProtKB:O60896	9606		20170628	P		UniProtKB	B2DD29	Brsk1	part_of	GO:0150034	distal axon	ECO:0000315	IMP	PMID:25788287		10116	part_of(CL:0002608)	20180309	C
UniProtKB	P30988	CALCR	involved_in	GO:0097647	amylin receptor signaling pathway	ECO:0000316	IGI	PMID:22500019	ComplexPortal:CPX-1134,UniProtKB:O60896	9606		20170628	P		UniProtKB	Q8TDC3	BRSK1	part_of	GO:0008021	synaptic vesicle	ECO:0000304	TAS	PMID:26444684		9606		20180314	C
UniProtKB	P30988	CALCR	involved_in	GO:1905665	positive regulation of calcium ion import across plasma membrane	ECO:0000316	IGI	PMID:22500019	ComplexPortal:CPX-1134,UniProtKB:O60896	9606		20170628	P		UniProtKB	Q8TDC3	BRSK1	part_of	GO:0048786	presynaptic active zone	ECO:0000304	TAS	PMID:26444684		9606		20180314	C
UniProtKB	P30988	CALCR	enables	GO:0001540	amyloid-beta binding	ECO:0000305	IC	PMID:22500019	GO:1904645	9606		20181030	F		UniProtKB	Q5RJI5	Brsk1	involved_in	GO:0008306	associative learning	ECO:0000315	IMP	PMID:26444684		10090		20180314	P
UniProtKB	P30988	CALCR	involved_in	GO:1904645	response to amyloid-beta	ECO:0000316	IGI	PMID:22500019	UniProtKB:O60896	9606		20181030	P		UniProtKB	Q5RJI5	Brsk1	involved_in	GO:0048167	regulation of synaptic plasticity	ECO:0000315	IMP	PMID:26444684		10090	regulates_o_occurs_in(UBERON:0003881),regulates_o_occurs_in(UBERON:0003882),regulates_o_occurs_in(UBERON:0003883)	20180314	P
UniProtKB	P07384	CAPN1	enables	GO:0004198	calcium-dependent cysteine-type endopeptidase activity	ECO:0000304	TAS	PMID:17526495		9606	has_input(UniProtKB:Q13224)	20171218	F		UniProtKB	Q5RJI5	Brsk1	involved_in	GO:0099504	synaptic vesicle cycle	ECO:0000315	IMP	PMID:26444684		10090	occurs_in(UBERON:0003881),occurs_in(UBERON:0003882),occurs_in(UBERON:0003883)	20180314	P
UniProtKB	P07384	CAPN1	involved_in	GO:2000310	regulation of NMDA receptor activity	ECO:0000304	TAS	PMID:17526495		9606	has_regulation_target(UniProtKB:Q13224),regulates_o_occurs_in(CL:0002608),occurs_in(CL:0002608)	20171218	P		UniProtKB	Q8TDC3	BRSK1	involved_in	GO:0006468	protein phosphorylation	ECO:0000304	TAS	PMID:27626661		9606	has_input(UniProtKB:Q86UR5)	20180516	P
UniProtKB	P20810	CAST	involved_in	GO:1990709	presynaptic active zone organization	ECO:0000304	TAS	PMID:27626661		9606		20180516	P		UniProtKB	Q8TDC3	BRSK1	part_of	GO:0008021	synaptic vesicle	ECO:0000304	TAS	PMID:27626661		9606		20180516	C
UniProtKB	P16671	CD36	involved_in	GO:0010628	positive regulation of gene expression	ECO:0000250	ISS	GO_REF:0000024	UniProtKB:Q08857	9606	regulates_o_occurs_in(CL:0000235),positively_regulates(GO:0002269),part_of(GO:0071404),regulates_expression_of(ENSEMBL:ENSG00000163739)|regulates_o_occurs_in(CL:0000235),positively_regulates(GO:0002269),part_of(GO:0071404),regulates_expression_of(ENSEMBL:ENSG00000081041)|regulates_o_occurs_in(CL:0000235),positively_regulates(GO:0002269),part_of(GO:0071404),regulates_expression_of(ENSEMBL:ENSG0000…	20170517	P		UniProtKB	Q8TDC3	BRSK1	part_of	GO:0048786	presynaptic active zone	ECO:0000304	TAS	PMID:27626661		9606		20180516	C
UniProtKB	P16671	CD36	involved_in	GO:0045429	positive regulation of nitric oxide biosynthetic process	ECO:0000250	ISS	GO_REF:0000024	UniProtKB:Q08857	9606	part_of(GO:1904646),regulates_o_occurs_in(CL:0000129),positively_regulates(GO:0070997)	20170517	P		UniProtKB	Q8TDC3	BRSK1	enables	GO:0048156	tau protein binding	ECO:0000303	NAS	PMID:28386764		9606		20181030	F
UniProtKB	P16671	CD36	involved_in	GO:1903428	positive regulation of reactive oxygen species biosynthetic process	ECO:0000250	ISS	GO_REF:0000024	UniProtKB:Q08857	9606	regulates_o_occurs_in(CL:0000235),positively_regulates(GO:0002269),part_of(GO:0071404)	20170517	P		UniProtKB	Q8TDC3	BRSK1	enables	GO:0050321	tau-protein kinase activity	ECO:0000303	NAS	PMID:28386764		9606		20181030	F
UniProtKB	P16671	CD36	enables	GO:0005044	scavenger receptor activity	ECO:0000304	TAS	PMID:11240025		9606	occurs_in(CL:0000113)	20170530	F		UniProtKB	Q8IWQ3	BRSK2	involved_in	GO:2000807	regulation of synaptic vesicle clustering	ECO:0000304	TAS	PMID:18268107		9606		20180313	P
UniProtKB	P16671	CD36	enables	GO:0001540	amyloid-beta binding	ECO:0000304	TAS	PMID:20037584		9606		20170517	F		UniProtKB	Q69Z98	Brsk2	involved_in	GO:0010975	regulation of neuron projection development	ECO:0000316	IGI	PMID:18268107	UniProtKB:Q5RJI5	10090	occurs_in(CL:0002608)	20180313	P
UniProtKB	P16671	CD36	enables	GO:0035325	Toll-like receptor binding	ECO:0000353	IPI	PMID:20037584	UniProtKB:O00206,UniProtKB:Q9Y2C9	9606	occurs_in(CL:0000576),part_of(GO:1904646)|occurs_in(CL:0000576),part_of(GO:0071404)	20170517	F		UniProtKB	Q69Z98	Brsk2	involved_in	GO:0050770	regulation of axonogenesis	ECO:0000316	IGI	PMID:18268107	UniProtKB:Q5RJI5	10090	occurs_in(CL:0002608)	20180313	P
UniProtKB	P16671	CD36	involved_in	GO:0034121	regulation of toll-like receptor signaling pathway	ECO:0000316	IGI	PMID:20037584	UniProtKB:P05067:PRO_0000000092	9606	has_regulation_target(UniProtKB:O00206),has_regulation_target(UniProtKB:Q9Y2C9)	20170517	P		UniProtKB	Q69Z98	Brsk2	involved_in	GO:0090176	microtubule cytoskeleton organization involved in establishment of planar polarity	ECO:0000316	IGI	PMID:18268107	UniProtKB:Q5RJI5	10090	occurs_in(CL:0002608),regulates(GO:0031175),regulates(GO:0007409)	20180313	P
UniProtKB	P16671	CD36	involved_in	GO:0043497	regulation of protein heterodimerization activity	ECO:0000315	IMP	PMID:20037584		9606	has_regulation_target(UniProtKB:O00206),has_regulation_target(UniProtKB:Q9Y2C9)	20170517	P		UniProtKB	D3ZML2	Brsk2	enables	GO:0004674	protein serine/threonine kinase activity	ECO:0000315	IMP	PMID:25788287		10116	occurs_in(GO:0150034),occurs_in(CL:0002608)	20180309	F
UniProtKB	P16671	CD36	involved_in	GO:0051092	positive regulation of NF-kappaB transcription factor activity	ECO:0000316	IGI	PMID:20037584	UniProtKB:O00206,UniProtKB:P05067:PRO_0000000092,UniProtKB:Q9Y2C9	9606		20170517	P		UniProtKB	D3ZML2	Brsk2	part_of	GO:0150034	distal axon	ECO:0000315	IMP	PMID:25788287		10116	part_of(CL:0002608)	20180309	C
UniProtKB	P16671	CD36	involved_in	GO:0051092	positive regulation of NF-kappaB transcription factor activity	ECO:0000316	IGI	PMID:20037584	UniProtKB:O00206,UniProtKB:Q9Y2C9	9606	regulates_o_occurs_in(CL:0000235),positively_regulates(GO:0002269),part_of(GO:0071404)	20170517	P		UniProtKB	Q8IWQ3	BRSK2	enables	GO:0048156	tau protein binding	ECO:0000303	NAS	PMID:28386764		9606		20181030	F
UniProtKB	P16671	CD36	involved_in	GO:1904646	cellular response to amyloid-beta	ECO:0000316	IGI	PMID:20037584	UniProtKB:O00206,UniProtKB:Q9Y2C9	9606		20170517	P		UniProtKB	Q8IWQ3	BRSK2	enables	GO:0050321	tau-protein kinase activity	ECO:0000303	NAS	PMID:28386764		9606		20181030	F
UniProtKB	P16671	CD36	part_of	GO:0005622	intracellular	ECO:0000353	IPI	PMID:20037584	UniProtKB:O00206,UniProtKB:Q9Y2C9	9606	part_of(CL:0000576),coincident_with(CHEBI:64647),exists_during(GO:0006897)|part_of(CL:0000576),coincident_with(CHEBI:60151),exists_during(GO:0006897)	20170517	C		UniProtKB	P01027	C3	involved_in	GO:0097242	amyloid-beta clearance	ECO:0000316	IGI	PMID:20199584	UniProtKB:P05555	10090	has_input(GO:0106003),has_input(UniProtKB:P12023:PRO_0000000118),occurs_in(CL:0000129)	20170605	P
UniProtKB	P16671	CD36	part_of	GO:0043235	receptor complex	ECO:0000353	IPI	PMID:20037584	UniProtKB:O00206,UniProtKB:Q9Y2C9	9606	part_of(CL:0000576),coincident_with(CHEBI:64647),part_of(GO:0005622)|part_of(CL:0000576),coincident_with(CHEBI:60151),part_of(GO:0005622)	20170517	C		UniProtKB	P01027	C3	involved_in	GO:0006911	phagocytosis, engulfment	ECO:0000315	IMP	PMID:22438044		10090	has_input(GO:0106003),occurs_in(CL:0000129),part_of(GO:0097242)	20170605	P
UniProtKB	P16671	CD36	involved_in	GO:0140052	cellular response to oxidised low-density lipoprotein particle stimulus	ECO:0000315	IMP	PMID:27607416		9606	occurs_in(CL:0002586)	20170703	P		UniProtKB	P01027	C3	involved_in	GO:0097242	amyloid-beta clearance	ECO:0000315	IMP	PMID:22438044		10090	has_input(GO:0106003),occurs_in(CL:0000129)	20170605	P
UniProtKB	P16671	CD36	involved_in	GO:0010942	positive regulation of cell death	ECO:0000315	IMP	PMID:27607416		9606	occurs_in(CL:0002586),part_of(GO:0140052)	20180118	P		UniProtKB	P54282	Cacna1a	part_of	GO:0043025	neuronal cell body	ECO:0000314	IDA	PMID:10964945		10116	part_of(CL:0000121)	20170523	C
UniProtKB	P16671	CD36	enables	GO:0150025	oxidised low-density lipoprotein particle receptor activity	ECO:0000315	IMP	PMID:27607416		9606	occurs_in(CL:0002586),part_of(GO:0034383)	20180219	F		UniProtKB	O00555	CACNA1A	involved_in	GO:1904645	response to amyloid-beta	ECO:0000314	IDA	PMID:18216187		9606	causally_upstream_of(GO:1901842)|causally_upstream_of(GO:1904878)|causally_upstream_of(GO:2000301)|causally_upstream_of(GO:0050804)	20170831	P
UniProtKB	P16671	CD36	involved_in	GO:0150024	oxidised low-density lipoprotein particle clearance	ECO:0000315	IMP	PMID:27607416		9606	occurs_in(CL:0002586)	20180219	P		UniProtKB	O00555	CACNA1A	enables	GO:0005245	voltage-gated calcium channel activity	ECO:0000316	IGI	PMID:21883149	UniProtKB:P54289,UniProtKB:Q02641	9606		20170523	F
UniProtKB	P16671	CD36	involved_in	GO:0098900	regulation of action potential	ECO:0000250	ISS	GO_REF:0000024	UniProtKB:Q08857	9606	occurs_in(CL:1001571)	20171220	P		UniProtKB	O00555	CACNA1A	enables	GO:0008331	high voltage-gated calcium channel activity	ECO:0000314	IDA	PMID:21883149		9606		20170523	F
UniProtKB	P16671	CD36	enables	GO:0005044	scavenger receptor activity	ECO:0000304	TAS	PMID:29111364		9606	occurs_at(GO:0009986)	20171220	F		UniProtKB	O00555	CACNA1A	involved_in	GO:1904646	cellular response to amyloid-beta	ECO:0000314	IDA	PMID:21883149		9606	causally_upstream_of(GO:1904879)	20170831	P
UniProtKB	P16671	CD36	involved_in	GO:0002532	production of molecular mediator involved in inflammatory response	ECO:0000304	TAS	PMID:29111364		9606		20171220	P		UniProtKB	O00555	CACNA1A	involved_in	GO:1904646	cellular response to amyloid-beta	ECO:0000316	IGI	PMID:21883149	UniProtKB:P54289,UniProtKB:Q02641	9606	causally_upstream_of(GO:1901387)	20170831	P
UniProtKB	P16671	CD36	involved_in	GO:0006631	fatty acid metabolic process	ECO:0000304	TAS	PMID:29111364		9606		20171220	P		UniProtKB	O00555	CACNA1A	enables	GO:0001540	amyloid-beta binding	ECO:0000305	IC	PMID:23376566	GO:0050804,GO:1904645	9606		20181030	F
UniProtKB	P16671	CD36	involved_in	GO:0006911	phagocytosis, engulfment	ECO:0000304	TAS	PMID:29111364		9606		20171220	P		UniProtKB	O00555	CACNA1A	enables	GO:0008331	high voltage-gated calcium channel activity	ECO:0000315	IMP	PMID:23376566		9606		20181030	F
UniProtKB	P16671	CD36	involved_in	GO:0031664	regulation of lipopolysaccharide-mediated signaling pathway	ECO:0000304	TAS	PMID:29111364		9606		20171220	P		UniProtKB	O00555	CACNA1A	involved_in	GO:1904645	response to amyloid-beta	ECO:0000314	IDA	PMID:23376566		9606		20181030	P
UniProtKB	P16671	CD36	part_of	GO:0009986	cell surface	ECO:0000304	TAS	PMID:29111364		9606		20171220	C		UniProtKB	O00555	CACNA1A	involved_in	GO:0050804	modulation of chemical synaptic transmission	ECO:0000314	IDA	PMID:23376566		9606	part_of(GO:1904645),occurs_in(UBERON:0002421)	20181030	P
UniProtKB	P16671	CD36	enables	GO:0001540	amyloid-beta binding	ECO:0000305	IC	PMID:20037584	GO:1904646	9606		20181030	F		UniProtKB	Q00975	CACNA1B	enables	GO:0001540	amyloid-beta binding	ECO:0000305	IC	PMID:23376566	GO:0050804,GO:1904645	9606		20181030	F
UniProtKB	P30307	CDC25C	enables	GO:0005515	protein binding	ECO:0000353	IPI	PMID:9543386	UniProtKB:P63104	9606		20180328	F		UniProtKB	Q00975	CACNA1B	enables	GO:0008331	high voltage-gated calcium channel activity	ECO:0000315	IMP	PMID:23376566		9606		20181030	F
UniProtKB	P30307	CDC25C	enables	GO:0019901	protein kinase binding	ECO:0000353	IPI	PMID:9543386	UniProtKB:P27448	9606	part_of(GO:0018105)	20180328	F		UniProtKB	Q00975	CACNA1B	involved_in	GO:1904645	response to amyloid-beta	ECO:0000314	IDA	PMID:23376566		9606		20181030	P
UniProtKB	P24941	CDK2	enables	GO:0004674	protein serine/threonine kinase activity	ECO:0000316	IGI	PMID:26996940	UniProtKB:P51943	9606	has_input(UniProtKB:P10636)	20180205	F		UniProtKB	Q00975	CACNA1B	involved_in	GO:0050804	modulation of chemical synaptic transmission	ECO:0000314	IDA	PMID:23376566		9606	part_of(GO:1904645),occurs_in(UBERON:0002421)	20181030	P
UniProtKB	Q00535	CDK5	involved_in	GO:1904646	cellular response to amyloid-beta	ECO:0000250	ISS	GO_REF:0000024	UniProtKB:Q03114	9606	causally_upstream_of(GO:0071902),occurs_in(CL:0002608)	20170831	P		UniProtKB	P54289	CACNA2D1	enables	GO:0005245	voltage-gated calcium channel activity	ECO:0000316	IGI	PMID:21883149	UniProtKB:O00555,UniProtKB:Q02641	9606		20170523	F
UniProtKB	Q00535	CDK5	involved_in	GO:0018105	peptidyl-serine phosphorylation	ECO:0000250	ISS	GO_REF:0000024	UniProtKB:P49615	9606	has_input(UniProtKB:Q13224),occurs_in(UBERON:0002421),regulates(GO:0072659)	20171030	P		UniProtKB	P54289	CACNA2D1	involved_in	GO:1902514	regulation of calcium ion transmembrane transport via high voltage-gated calcium channel	ECO:0000316	IGI	PMID:21883149	UniProtKB:O00555,UniProtKB:P05067:PRO_0000000092,UniProtKB:Q02641	9606	has_regulation_target(UniProtKB:O00555)	20170831	P
UniProtKB	Q00535	CDK5	involved_in	GO:0018107	peptidyl-threonine phosphorylation	ECO:0000250	ISS	GO_REF:0000024	UniProtKB:P49615	9606	has_input(UniProtKB:Q9UD71),occurs_in(UBERON:0002421)	20171030	P		UniProtKB	P54289	CACNA2D1	involved_in	GO:1904646	cellular response to amyloid-beta	ECO:0000316	IGI	PMID:21883149	UniProtKB:O00555,UniProtKB:Q02641	9606	causally_upstream_of(GO:1901387)	20170831	P
UniProtKB	Q00535	CDK5	involved_in	GO:1903076	regulation of protein localization to plasma membrane	ECO:0000250	ISS	GO_REF:0000024	UniProtKB:P49615	9606	has_regulation_target(UniProtKB:Q13224),regulates_o_occurs_in(GO:0030425),regulates_o_occurs_in(CL:0002608)	20171030	P		UniProtKB	Q02641	CACNB1	enables	GO:0005245	voltage-gated calcium channel activity	ECO:0000316	IGI	PMID:21883149	UniProtKB:O00555,UniProtKB:P54289	9606		20170523	F
UniProtKB	Q00535	CDK5	colocalizes_with	GO:0005874	microtubule	ECO:0000250	ISS	GO_REF:0000024	UniProtKB:Q03114	9606	part_of(UBERON:0000955)	20171102	C		UniProtKB	Q02641	CACNB1	involved_in	GO:1902514	regulation of calcium ion transmembrane transport via high voltage-gated calcium channel	ECO:0000316	IGI	PMID:21883149	UniProtKB:O00555,UniProtKB:P05067:PRO_0000000092,UniProtKB:P54289	9606	has_regulation_target(UniProtKB:O00555)	20170831	P
UniProtKB	Q00535	CDK5	part_of	GO:0005737	cytoplasm	ECO:0000250	ISS	GO_REF:0000024	UniProtKB:Q03114	9606	part_of(UBERON:0000955)	20171102	C		UniProtKB	Q02641	CACNB1	involved_in	GO:1904646	cellular response to amyloid-beta	ECO:0000316	IGI	PMID:21883149	UniProtKB:O00555,UniProtKB:P54289	9606	causally_upstream_of(GO:1901387)	20170831	P
UniProtKB	Q00535	CDK5	involved_in	GO:0051966	regulation of synaptic transmission, glutamatergic	ECO:0000250	ISS	GO_REF:0000024	UniProtKB:P49615	9606	occurs_in(UBERON:0014548),regulates_o_occurs_in(CL:0002608),regulates_o_occurs_in(UBERON:0014548)	20180109	P		UniProtKB	P06881	CALCA	involved_in	GO:0097647	amylin receptor signaling pathway	ECO:0000316	IGI	PMID:22500019	ComplexPortal:CPX-2173	9606		20170524	P
UniProtKB	Q00535	CDK5	part_of	GO:0016020	membrane	ECO:0000250	ISS	GO_REF:0000024	UniProtKB:Q03114	9606	part_of(UBERON:0000955)	20180514	C		UniProtKB	P06881	CALCA	involved_in	GO:0097647	amylin receptor signaling pathway	ECO:0000316	IGI	PMID:22500019	UniProtKB:O60894,UniProtKB:P30988	9606		20170524	P
UniProtKB	Q00535	CDK5	part_of	GO:0030426	growth cone	ECO:0000250	ISS	GO_REF:0000024	UniProtKB:Q03114	9606	part_of(UBERON:0000955),part_of(CL:1001611)|part_of(UBERON:0000955),part_of(CL:0002608)	20180514	C		UniProtKB	P30988	CALCR	contributes_to	GO:0097643	amylin receptor activity	ECO:0000316	IGI	PMID:22500019	UniProtKB:O60894,UniProtKB:P06881|UniProtKB:O60894,UniProtKB:P10997:PRO_0000004106|UniProtKB:O60894,UniProtKB:P12969:PRO_0000004122|UniProtKB:O60894,UniProtKB:P35318|UniProtKB:O60895,UniProtKB:P12969:PRO_0000004122|UniProtKB:O60895,UniProtKB:P35318|UniProtKB:O60896,UniProtKB:P10997:PRO_0000004106	9606		20170524	F
UniProtKB	Q00535	CDK5	part_of	GO:0043005	neuron projection	ECO:0000250	ISS	GO_REF:0000024	UniProtKB:Q03114	9606	part_of(UBERON:0000955),part_of(CL:1001611)|part_of(UBERON:0000955),part_of(CL:0002608)	20180514	C		UniProtKB	P30988	CALCR	involved_in	GO:0010628	positive regulation of gene expression	ECO:0000316	IGI	PMID:22500019	UniProtKB:O60896,UniProtKB:P10997:PRO_0000004106	9606	regulates_expression_of(ENSEMBL:ENSG00000170345)	20170524	P
UniProtKB	Q00535	CDK5	involved_in	GO:0000226	microtubule cytoskeleton organization	ECO:0000304	TAS	PMID:17491008		9606		20171030	P		UniProtKB	P30988	CALCR	involved_in	GO:0010739	positive regulation of protein kinase A signaling	ECO:0000316	IGI	PMID:22500019	UniProtKB:O60896,UniProtKB:P10997:PRO_0000004106	9606	has_regulation_target(UniProtKB:P13861)	20170524	P
UniProtKB	Q00535	CDK5	involved_in	GO:0006468	protein phosphorylation	ECO:0000304	TAS	PMID:17491008		9606	has_input(UniProtKB:P46821)|has_input(UniProtKB:P11137)|has_input(UniProtKB:P10636)|has_input(UniProtKB:O43602)	20171030	P		UniProtKB	P30988	CALCR	involved_in	GO:0010942	positive regulation of cell death	ECO:0000316	IGI	PMID:22500019	UniProtKB:O60896,UniProtKB:P10997:PRO_0000004106	9606	regulates_expression_of(ENSEMBL:ENSG00000170345)	20170524	P
UniProtKB	Q00535	CDK5	involved_in	GO:0031175	neuron projection development	ECO:0000304	TAS	PMID:17491008		9606		20171030	P		UniProtKB	P30988	CALCR	involved_in	GO:0033138	positive regulation of peptidyl-serine phosphorylation	ECO:0000316	IGI	PMID:22500019	UniProtKB:O60896,UniProtKB:P10997:PRO_0000004106	9606	has_regulation_target(UniProtKB:P13861)	20170524	P
UniProtKB	Q00535	CDK5	NOT|enables	GO:0008017	microtubule binding	ECO:0000304	TAS	PMID:17491008		9606		20171102	F		UniProtKB	P30988	CALCR	involved_in	GO:0051897	positive regulation of protein kinase B signaling	ECO:0000316	IGI	PMID:22500019	UniProtKB:O60896,UniProtKB:P10997:PRO_0000004106	9606		20170524	P
UniProtKB	Q00535	CDK5	involved_in	GO:0048167	regulation of synaptic plasticity	ECO:0000304	TAS	PMID:24607229		9606		20171030	P		UniProtKB	P30988	CALCR	involved_in	GO:0070374	positive regulation of ERK1 and ERK2 cascade	ECO:0000316	IGI	PMID:22500019	UniProtKB:O60896,UniProtKB:P05067:PRO_0000000092	9606		20170524	P
UniProtKB	Q00535	CDK5	enables	GO:0004674	protein serine/threonine kinase activity	ECO:0000303	NAS	PMID:28386764		9606	has_input(UniProtKB:P10636)	20180122	F		UniProtKB	P30988	CALCR	involved_in	GO:0070374	positive regulation of ERK1 and ERK2 cascade	ECO:0000316	IGI	PMID:22500019	UniProtKB:O60896,UniProtKB:P10997:PRO_0000004106	9606		20170524	P
UniProtKB	Q00535	CDK5	enables	GO:0048156	tau protein binding	ECO:0000303	NAS	PMID:28386764		9606		20181030	F		UniProtKB	P30988	CALCR	involved_in	GO:0097647	amylin receptor signaling pathway	ECO:0000316	IGI	PMID:22500019	ComplexPortal:CPX-2173	9606		20170524	P
UniProtKB	Q00535	CDK5	enables	GO:0050321	tau-protein kinase activity	ECO:0000303	NAS	PMID:28386764		9606		20181030	F		UniProtKB	P30988	CALCR	involved_in	GO:0097647	amylin receptor signaling pathway	ECO:0000316	IGI	PMID:22500019	UniProtKB:O60894,UniProtKB:P06881	9606		20170524	P
UniProtKB	Q15078	CDK5R1	colocalizes_with	GO:0005874	microtubule	ECO:0000250	ISS	GO_REF:0000024	UniProtKB:Q28199	9606	part_of(GO:0043005),part_of(UBERON:0000955)|part_of(GO:0030426),part_of(UBERON:0000955)	20171102	C		UniProtKB	P30988	CALCR	involved_in	GO:0097647	amylin receptor signaling pathway	ECO:0000316	IGI	PMID:22500019	UniProtKB:O60894,UniProtKB:P10997:PRO_0000004106	9606		20170524	P
UniProtKB	Q15078	CDK5R1	enables	GO:0043014	alpha-tubulin binding	ECO:0000250	ISS	GO_REF:0000024	UniProtKB:Q28199	9606	occurs_in(UBERON:0000955)	20171102	F		UniProtKB	P30988	CALCR	involved_in	GO:0097647	amylin receptor signaling pathway	ECO:0000316	IGI	PMID:22500019	UniProtKB:O60894,UniProtKB:P12969:PRO_0000004122	9606		20170524	P
UniProtKB	Q15078	CDK5R1	enables	GO:0048487	beta-tubulin binding	ECO:0000250	ISS	GO_REF:0000024	UniProtKB:Q28199	9606	occurs_in(UBERON:0000955)	20171102	F		UniProtKB	P30988	CALCR	involved_in	GO:0097647	amylin receptor signaling pathway	ECO:0000316	IGI	PMID:22500019	UniProtKB:O60894,UniProtKB:P35318	9606		20170524	P
UniProtKB	Q15078	CDK5R1	involved_in	GO:0031116	positive regulation of microtubule polymerization	ECO:0000250	ISS	GO_REF:0000024	UniProtKB:Q28199	9606		20171102	P		UniProtKB	P30988	CALCR	involved_in	GO:0097647	amylin receptor signaling pathway	ECO:0000316	IGI	PMID:22500019	UniProtKB:O60895,UniProtKB:P12969:PRO_0000004122	9606		20170524	P
UniProtKB	Q15078	CDK5R1	part_of	GO:0030426	growth cone	ECO:0000250	ISS	GO_REF:0000024	UniProtKB:Q28199	9606		20171102	C		UniProtKB	P30988	CALCR	involved_in	GO:0097647	amylin receptor signaling pathway	ECO:0000316	IGI	PMID:22500019	UniProtKB:O60895,UniProtKB:P35318	9606		20170524	P
UniProtKB	Q15078	CDK5R1	part_of	GO:0043005	neuron projection	ECO:0000250	ISS	GO_REF:0000024	UniProtKB:Q28199	9606		20171102	C		UniProtKB	P30988	CALCR	involved_in	GO:0097647	amylin receptor signaling pathway	ECO:0000316	IGI	PMID:22500019	UniProtKB:O60896,UniProtKB:P10997:PRO_0000004106	9606		20170524	P
UniProtKB	Q15078	CDK5R1	enables	GO:0016534	cyclin-dependent protein kinase 5 activator activity	ECO:0000304	TAS	PMID:17491008		9606	has_regulation_target(UniProtKB:Q00535),occurs_in(CL:0000540)	20171030	F		UniProtKB	P30988	CALCR	involved_in	GO:1905665	positive regulation of calcium ion import across plasma membrane	ECO:0000316	IGI	PMID:22500019	UniProtKB:O60896,UniProtKB:P10997:PRO_0000004106	9606		20170524	P
UniProtKB	Q15078	CDK5R1	involved_in	GO:0000226	microtubule cytoskeleton organization	ECO:0000304	TAS	PMID:17491008		9606		20171030	P		UniProtKB	P30988	CALCR	involved_in	GO:0010942	positive regulation of cell death	ECO:0000316	IGI	PMID:22500019	ComplexPortal:CPX-1134,UniProtKB:O60896	9606		20170628	P
UniProtKB	Q15078	CDK5R1	involved_in	GO:0031175	neuron projection development	ECO:0000304	TAS	PMID:17491008		9606		20171030	P		UniProtKB	P30988	CALCR	involved_in	GO:0033138	positive regulation of peptidyl-serine phosphorylation	ECO:0000316	IGI	PMID:22500019	ComplexPortal:CPX-1134,UniProtKB:O60896	9606	has_regulation_target(UniProtKB:P13861)	20170628	P
UniProtKB	Q15078:PRO_0000004795	CDK5R1	NOT|enables	GO:0043014	alpha-tubulin binding	ECO:0000250	ISS	GO_REF:0000024	UniProtKB:Q28199:PRO_0000004795	9606		20171102	F		UniProtKB	P30988	CALCR	involved_in	GO:0051897	positive regulation of protein kinase B signaling	ECO:0000316	IGI	PMID:22500019	ComplexPortal:CPX-1134,UniProtKB:O60896	9606		20170628	P
UniProtKB	Q15078:PRO_0000004795	CDK5R1	NOT|enables	GO:0048487	beta-tubulin binding	ECO:0000250	ISS	GO_REF:0000024	UniProtKB:Q28199:PRO_0000004795	9606		20171102	F		UniProtKB	P30988	CALCR	involved_in	GO:0097647	amylin receptor signaling pathway	ECO:0000316	IGI	PMID:22500019	ComplexPortal:CPX-1134,UniProtKB:O60896	9606		20170628	P
UniProtKB	Q13319	CDK5R2	enables	GO:0003779	actin binding	ECO:0000250	ISS	GO_REF:0000024	UniProtKB:O35926	9606	occurs_in(UBERON:0000955)	20180514	F		UniProtKB	P30988	CALCR	involved_in	GO:1905665	positive regulation of calcium ion import across plasma membrane	ECO:0000316	IGI	PMID:22500019	ComplexPortal:CPX-1134,UniProtKB:O60896	9606		20170628	P
UniProtKB	Q13319	CDK5R2	enables	GO:0016534	cyclin-dependent protein kinase 5 activator activity	ECO:0000250	ISS	GO_REF:0000024	UniProtKB:O35926	9606	occurs_in(UBERON:0000955),has_regulation_target(UniProtKB:Q00535)	20180514	F		UniProtKB	P30988	CALCR	enables	GO:0001540	amyloid-beta binding	ECO:0000305	IC	PMID:22500019	GO:1904645	9606		20181030	F
UniProtKB	Q13319	CDK5R2	part_of	GO:0005737	cytoplasm	ECO:0000250	ISS	GO_REF:0000024	UniProtKB:F1M491	9606	part_of(UBERON:0000955)	20180514	C		UniProtKB	P30988	CALCR	involved_in	GO:1904645	response to amyloid-beta	ECO:0000316	IGI	PMID:22500019	UniProtKB:O60896	9606		20181030	P
UniProtKB	Q13319	CDK5R2	part_of	GO:0016020	membrane	ECO:0000250	ISS	GO_REF:0000024	UniProtKB:F1M491	9606	part_of(UBERON:0000955)	20180514	C		UniProtKB	P11275	Camk2a	involved_in	GO:1903076	regulation of protein localization to plasma membrane	ECO:0000316	IGI	PMID:19188609	ComplexPortal:CPX-1134,UniProtKB:P08413,UniProtKB:P11730,UniProtKB:P15791	10116	occurs_in(CL:0002608),has_target_start_location(GO:0032590),transports_or_maintains_localization_of(UniProtKB:P06213),has_target_end_location(GO:0032809)|occurs_in(CL:0002608),has_target_start_location(GO:0032590),transports_or_maintains_localization_of(GO:0017146),has_target_end_location(GO:0032809)	20170628	P
UniProtKB	Q13319	CDK5R2	part_of	GO:0030426	growth cone	ECO:0000250	ISS	GO_REF:0000024	UniProtKB:F1M491	9606	part_of(UBERON:0000955),part_of(CL:1001611)|part_of(UBERON:0000955),part_of(CL:0002608)	20180514	C		UniProtKB	P08413	Camk2b	involved_in	GO:1903076	regulation of protein localization to plasma membrane	ECO:0000316	IGI	PMID:19188609	ComplexPortal:CPX-1134,UniProtKB:P11275,UniProtKB:P11730,UniProtKB:P15791	10116	occurs_in(CL:0002608),has_target_start_location(GO:0032590),transports_or_maintains_localization_of(UniProtKB:P06213),has_target_end_location(GO:0032809)|occurs_in(CL:0002608),has_target_start_location(GO:0032590),transports_or_maintains_localization_of(GO:0017146),has_target_end_location(GO:0032809)	20170628	P
UniProtKB	Q13319	CDK5R2	part_of	GO:0043005	neuron projection	ECO:0000250	ISS	GO_REF:0000024	UniProtKB:F1M491	9606	part_of(UBERON:0000955),part_of(CL:1001611)|part_of(UBERON:0000955),part_of(CL:0002608)	20180514	C		UniProtKB	P15791	Camk2d	involved_in	GO:1903076	regulation of protein localization to plasma membrane	ECO:0000316	IGI	PMID:19188609	ComplexPortal:CPX-1134,UniProtKB:P08413,UniProtKB:P11275,UniProtKB:P11730	10116	occurs_in(CL:0002608),has_target_start_location(GO:0032590),transports_or_maintains_localization_of(UniProtKB:P06213),has_target_end_location(GO:0032809)|occurs_in(CL:0002608),has_target_start_location(GO:0032590),transports_or_maintains_localization_of(GO:0017146),has_target_end_location(GO:0032809)	20170628	P
UniProtKB	Q13319	CDK5R2	enables	GO:0016534	cyclin-dependent protein kinase 5 activator activity	ECO:0000304	TAS	PMID:17491008		9606	has_regulation_target(UniProtKB:Q00535),occurs_in(UBERON:0001017)	20171030	F		UniProtKB	P11730	Camk2g	involved_in	GO:1903076	regulation of protein localization to plasma membrane	ECO:0000316	IGI	PMID:19188609	ComplexPortal:CPX-1134,UniProtKB:P08413,UniProtKB:P11275,UniProtKB:P15791	10116	occurs_in(CL:0002608),has_target_start_location(GO:0032590),transports_or_maintains_localization_of(UniProtKB:P06213),has_target_end_location(GO:0032809)|occurs_in(CL:0002608),has_target_start_location(GO:0032590),transports_or_maintains_localization_of(GO:0017146),has_target_end_location(GO:0032809)	20170628	P
UniProtKB	Q96SZ6	CDK5RAP1	involved_in	GO:0045736	negative regulation of cyclin-dependent protein serine/threonine kinase activity	ECO:0000304	TAS	PMID:17491008		9606	has_regulation_target(UniProtKB:Q00535)	20171030	P		UniProtKB	P07384	CAPN1	enables	GO:0004198	calcium-dependent cysteine-type endopeptidase activity	ECO:0000304	TAS	PMID:17526495		9606	has_input(UniProtKB:Q13224)	20171218	F
UniProtKB	P23528	CFL1	involved_in	GO:0030042	actin filament depolymerization	ECO:0000303	NAS	PMID:24052308		9606		20170725	P		UniProtKB	P07384	CAPN1	involved_in	GO:2000310	regulation of NMDA receptor activity	ECO:0000304	TAS	PMID:17526495		9606	has_regulation_target(UniProtKB:Q13224),regulates_o_occurs_in(CL:0002608),occurs_in(CL:0002608)	20171218	P
UniProtKB	P13569	CFTR	enables	GO:0051087	chaperone binding	ECO:0000353	IPI	PMID:16207813	UniProtKB:O95816	9606	part_of(GO:0050821)	20180305	F		UniProtKB	O35350	Capn1	enables	GO:0005515	protein binding	ECO:0000353	IPI	PMID:19118186	UniProtKB:P61809	10090		20171106	F
UniProtKB	O43633	CHMP2A	colocalizes_with	GO:0000785	chromatin	ECO:0000314	IDA	PMID:28242692		9606	exists_during(GO:0000092)	20170912	C		UniProtKB	P20810	CAST	involved_in	GO:1990709	presynaptic active zone organization	ECO:0000304	TAS	PMID:27626661		9606		20180516	P
UniProtKB	Q8WUX9	CHMP7	enables	GO:0005515	protein binding	ECO:0000353	IPI	PMID:28242692	UniProtKB:Q8NC56	9606	happens_during(GO:0051322)	20170504	F		UniProtKB	P27321	Cast	part_of	GO:0014069	postsynaptic density	ECO:0000314	IDA	PMID:27626661		10116		20180516	C
UniProtKB	Q8WUX9	CHMP7	part_of	GO:0000815	ESCRT III complex	ECO:0000303	NAS	PMID:28242692		9606		20170504	C		UniProtKB	P27321	Cast	part_of	GO:0016020	membrane	ECO:0000314	IDA	PMID:27626661		10116		20180516	C
UniProtKB	Q8WUX9	CHMP7	colocalizes_with	GO:0000785	chromatin	ECO:0000314	IDA	PMID:28242692		9606	exists_during(GO:0000092)	20170912	C		UniProtKB	P16671	CD36	enables	GO:0005044	scavenger receptor activity	ECO:0000304	TAS	PMID:11240025		9606	occurs_in(CL:0000113)	20170530	F
UniProtKB	Q8WUX9	CHMP7	involved_in	GO:0031468	nuclear envelope reassembly	ECO:0000304	TAS	PMID:28242692		9606		20170912	P		UniProtKB	P16671	CD36	enables	GO:0001540	amyloid-beta binding	ECO:0000304	TAS	PMID:20037584		9606		20170517	F
UniProtKB	Q8WUX9	CHMP7	involved_in	GO:0071168	protein localization to chromatin	ECO:0000315	IMP	PMID:28242692		9606	has_input(UniProtKB:P53990),happens_during(GO:0000092)|has_input(UniProtKB:Q8WUX9),happens_during(GO:0051322)|has_input(UniProtKB:O43633),happens_during(GO:0000092)|has_input(ComplexPortal:CPX-329),happens_during(GO:0051322)	20170912	P		UniProtKB	P16671	CD36	enables	GO:0035325	Toll-like receptor binding	ECO:0000353	IPI	PMID:20037584	UniProtKB:O00206,UniProtKB:Q9Y2C9	9606	occurs_in(CL:0000576),part_of(GO:1904646)|occurs_in(CL:0000576),part_of(GO:0071404)	20170517	F
UniProtKB	P32297	CHRNA3	involved_in	GO:0095500	acetylcholine receptor signaling pathway	ECO:0000250	ISS	GO_REF:0000024	UniProtKB:P04757	9606	occurs_in(CL:0002608)	20170120	P		UniProtKB	P16671	CD36	involved_in	GO:0034121	regulation of toll-like receptor signaling pathway	ECO:0000316	IGI	PMID:20037584	UniProtKB:P05067:PRO_0000000092	9606	has_regulation_target(UniProtKB:O00206),has_regulation_target(UniProtKB:Q9Y2C9)	20170517	P
UniProtKB	P32297	CHRNA3	involved_in	GO:1905144	response to acetylcholine	ECO:0000250	ISS	GO_REF:0000024	UniProtKB:P04757	9606	occurs_in(CL:0002608),occurs_in(GO:0044853)	20170120	P		UniProtKB	P16671	CD36	involved_in	GO:0043497	regulation of protein heterodimerization activity	ECO:0000315	IMP	PMID:20037584		9606	has_regulation_target(UniProtKB:O00206),has_regulation_target(UniProtKB:Q9Y2C9)	20170517	P
UniProtKB	P32297	CHRNA3	enables	GO:0022848	acetylcholine-gated cation-selective channel activity	ECO:0000250	ISS	GO_REF:0000024	UniProtKB:P04757	9606	occurs_in(CL:0002608),occurs_at(GO:0044853)	20170425	F		UniProtKB	P16671	CD36	involved_in	GO:0051092	positive regulation of NF-kappaB transcription factor activity	ECO:0000316	IGI	PMID:20037584	UniProtKB:O00206,UniProtKB:P05067:PRO_0000000092,UniProtKB:Q9Y2C9	9606		20170517	P
UniProtKB	P32297	CHRNA3	part_of	GO:0044853	plasma membrane raft	ECO:0000250	ISS	GO_REF:0000024	UniProtKB:P04757	9606		20170425	C		UniProtKB	P16671	CD36	involved_in	GO:0051092	positive regulation of NF-kappaB transcription factor activity	ECO:0000316	IGI	PMID:20037584	UniProtKB:O00206,UniProtKB:Q9Y2C9	9606	regulates_o_occurs_in(CL:0000235),positively_regulates(GO:0002269),part_of(GO:0071404)	20170517	P
UniProtKB	P36544	CHRNA7	involved_in	GO:0097061	dendritic spine organization	ECO:0000250	ISS	GO_REF:0000024	UniProtKB:P49582	9606	occurs_in(UBERON:0003881),occurs_in(CL:0002608),occurs_in(GO:0098794)	20170109	P		UniProtKB	P16671	CD36	involved_in	GO:1904646	cellular response to amyloid-beta	ECO:0000316	IGI	PMID:20037584	UniProtKB:O00206,UniProtKB:Q9Y2C9	9606		20170517	P
UniProtKB	P36544	CHRNA7	involved_in	GO:0001934	positive regulation of protein phosphorylation	ECO:0000250	ISS	GO_REF:0000024	UniProtKB:P49582	9606	occurs_in(UBERON:0003027)	20170120	P		UniProtKB	P16671	CD36	part_of	GO:0005622	intracellular	ECO:0000353	IPI	PMID:20037584	UniProtKB:O00206,UniProtKB:Q9Y2C9	9606	part_of(CL:0000576),coincident_with(CHEBI:64647),exists_during(GO:0006897)|part_of(CL:0000576),coincident_with(CHEBI:60151),exists_during(GO:0006897)	20170517	C
UniProtKB	P36544	CHRNA7	involved_in	GO:0007613	memory	ECO:0000250	ISS	GO_REF:0000024	UniProtKB:Q05941	9606		20170120	P		UniProtKB	P16671	CD36	part_of	GO:0043235	receptor complex	ECO:0000353	IPI	PMID:20037584	UniProtKB:O00206,UniProtKB:Q9Y2C9	9606	part_of(CL:0000576),coincident_with(CHEBI:64647),part_of(GO:0005622)|part_of(CL:0000576),coincident_with(CHEBI:60151),part_of(GO:0005622)	20170517	C
UniProtKB	P36544	CHRNA7	involved_in	GO:0007614	short-term memory	ECO:0000250	ISS	GO_REF:0000024	UniProtKB:Q866A2	9606		20170120	P		UniProtKB	Q08857	Cd36	involved_in	GO:0010628	positive regulation of gene expression	ECO:0000315	IMP	PMID:20037584		10090	regulates_o_occurs_in(CL:0000235),positively_regulates(GO:0002269),part_of(GO:0071404),regulates_expression_of(ENSEMBL:ENSMUSG00000029380)|regulates_o_occurs_in(CL:0000235),positively_regulates(GO:0002269),part_of(GO:0071404),regulates_expression_of(ENSEMBL:ENSMUSG00000058427)|regulates_o_occurs_in(CL:0000235),positively_regulates(GO:0002269),part_of(GO:0071404),regulates_expression_of(ENSEMBL:EN…	20170517	P
UniProtKB	P36544	CHRNA7	involved_in	GO:0050893	sensory processing	ECO:0000250	ISS	GO_REF:0000024	UniProtKB:P49582	9606		20170120	P		UniProtKB	Q08857	Cd36	involved_in	GO:0045429	positive regulation of nitric oxide biosynthetic process	ECO:0000316	IGI	PMID:20037584	UniProtKB:P05067:PRO_0000000092	10090	part_of(GO:1904646),regulates_o_occurs_in(CL:0000129),positively_regulates(GO:0070997)	20170517	P
UniProtKB	P36544	CHRNA7	involved_in	GO:0050893	sensory processing	ECO:0000250	ISS	GO_REF:0000024	UniProtKB:Q05941	9606		20170120	P		UniProtKB	Q08857	Cd36	involved_in	GO:1903428	positive regulation of reactive oxygen species biosynthetic process	ECO:0000315	IMP	PMID:20037584		10090	regulates_o_occurs_in(CL:0000235),positively_regulates(GO:0002269),part_of(GO:0071404)	20170517	P
UniProtKB	P36544	CHRNA7	involved_in	GO:0070374	positive regulation of ERK1 and ERK2 cascade	ECO:0000250	ISS	GO_REF:0000024	UniProtKB:P49582	9606	occurs_in(UBERON:0003027),regulates_o_occurs_in(GO:0043005)|occurs_in(UBERON:0001885),regulates_o_occurs_in(GO:0043005)	20170120	P		UniProtKB	P16671	CD36	involved_in	GO:0140052	cellular response to oxidised low-density lipoprotein particle stimulus	ECO:0000315	IMP	PMID:27607416		9606	occurs_in(CL:0002586)	20170703	P
UniProtKB	P36544	CHRNA7	involved_in	GO:0070374	positive regulation of ERK1 and ERK2 cascade	ECO:0000250	ISS	GO_REF:0000024	UniProtKB:Q05941	9606		20170120	P		UniProtKB	P16671	CD36	involved_in	GO:0010942	positive regulation of cell death	ECO:0000315	IMP	PMID:27607416		9606	occurs_in(CL:0002586),part_of(GO:0140052)	20180118	P
[truncated: 2,933 more rows]

## Sheet: Table S4
Table S4. All manually-curated GO annotations for the prioritised gene products (Table S1), contributed by ARUK-UCL, as well as by other groups (Data from QuickGO - accessed: 31 October 2018; filtered by database identifiers from Table S1 and evidence used in manual assertion (ECO:0000352)). Approximately 27 % of all these annotations were contributed by ARUK-UCL (2070 ARUK-UCL annotations out of…
[truncated: 7,700 more rows]

[truncated: 7 more sheets: Table S5, Table S6, Table S7, Table S8, Table S9, Table S10, Table S11]
